# Supplementary material
Source: publisher figshare collection journal article supplement (https://gsajournals.figshare.com/ndownloader/files/22015065)
Supplement: Supplementary file 1 [file 22015065]

## Sheet: List_of_genes
gene_id	gene_description	gene_name	baseMeanCPM_T_30	baseMeanCPM_V_30	FC	logFC	logCPM	LR	PValue	FDR	transcript_count	gene_biotype	zfin_id_id	Entrez_id	Uniprot_id	go_id	go_term	go_ontology	interpro_family	interpro_family_description	goslim_goa_accession	goslim_goa_description	kegg_path_enzyme
ENSONIG00000006279	palmitoyltransferase ZDHHC3	zgc:77880	6.54094	17.9253	-2.74858	-1.45869	3.34119	39.1845	3.85582e-10	4.35965e-06	2	protein_coding	ZDB-GENE-040426-1901	100707932	I3JGC1;I3JGC2	GO:0016020;GO:0016021;GO:0016740;GO:0016746;GO:0019706	membrane;integral component of membrane;transferase activity;transferase activity, transferring acyl groups;protein-cysteine S-palmitoyltransferase activity	cellular_component;molecular_function	PTHR22883_SF21	PALMITOYLTRANSFERASE EC_2.3.1.225	GO:0005575;GO:0016746	cellular_component;transferase activity, transferring acyl groups
ENSONIG00000016380			0.0585875	3.50686	-51.5606	-5.6882	0.17381	37.993	7.09987e-10	4.35965e-06	1	protein_coding				GO:0005515	protein binding	molecular_function			GO:0003674	molecular_function
ENSONIG00000025501			0.476725	17.9423	-36.5861	-5.19322	2.52429	37.914	7.39342e-10	4.35965e-06	2	lincRNA
ENSONIG00000008086	myosin-6		1.46443	6.95493	-4.79538	-2.26165	1.91505	36.2463	1.7389e-09	7.69027e-06	1	protein_coding		100707241	I3JMU2	GO:0016459;GO:0003774;GO:0051015;GO:0005524;GO:0005515;GO:0000166;GO:0003779	myosin complex;motor activity;actin filament binding;ATP binding;protein binding;nucleotide binding;actin binding	cellular_component;molecular_function	PTHR13140_SF260	MYOSIN 6 MYOSIN HEAVY CHAIN 6 MYOSIN HEAVY CHAIN CARDIAC MUSCLE ALPHA MYHC ALPHA	GO:0003674;GO:0043167;GO:0008092;GO:0032991;GO:0005575;GO:0043226;GO:0005856	molecular_function;ion binding;cytoskeletal protein binding;protein-containing complex;cellular_component;organelle;cytoskeleton
ENSONIG00000020090			0.175749	3.49955	-18.3255	-4.19578	0.711775	32.4484	1.224e-08	4.33053e-05	1	protein_coding							PTHR23220_SF17	INTEGRIN ALPHA X PRECURSOR CD11 ANTIGEN FAMILY MEMBER C LEUKOCYTE ADHESION GLYCOPROTEIN P150 95 ALPHA CHAIN LEUKOCYTE ADHESION RECEPTOR P150 95 CD11C ANTIGEN
ENSONIG00000017772			0.389177	6.46801	-16.0191	-4.00173	1.62315	29.5595	5.42265e-08	0.000159878	1	protein_coding				GO:0005515	protein binding	molecular_function	PTHR10271	INTERFERON INDUCED WITH TETRATRICOPEPTIDE REPEATS IFIT INTERFERON INDUCED KDA IFI	GO:0003674	molecular_function
ENSONIG00000003458	POP4 homolog, ribonuclease P/MRP subunit	pop4	6.04693	13.4943	-2.22372	-1.15298	3.24986	24.4265	7.7201e-07	0.00195098	1	protein_coding	ZDB-GENE-050522-505			GO:0006396;GO:0004540;GO:0008033;GO:0003723;GO:0030677;GO:0005634;GO:0090501;GO:0090502;GO:0005730;GO:0004526	RNA processing;ribonuclease activity;tRNA processing;RNA binding;ribonuclease P complex;nucleus;RNA phosphodiester bond hydrolysis;RNA phosphodiester bond hydrolysis, endonucleolytic;nucleolus;ribonuclease P activity	biological_process;molecular_function;cellular_component	PTHR13348_SF0	RIBONUCLEASE P SUBUNIT EC_3.1.26.5	GO:0003674;GO:0003723;GO:0034641;GO:0006399;GO:0004518;GO:0032991;GO:0005575;GO:0043226;GO:0005634;GO:0005730	molecular_function;RNA binding;cellular nitrogen compound metabolic process;tRNA metabolic process;nuclease activity;protein-containing complex;cellular_component;organelle;nucleus;nucleolus
ENSONIG00000012073			4.9842	10.4683	-2.09746	-1.06864	2.8042	24.1344	8.98417e-07	0.00198663	2	protein_coding							PTHR23250	TECTONIN BETA PROPELLER REPEAT CONTAINING 1
ENSONIG00000017094	potassium channel subfamily K member 2		5.71432	12.7848	-2.23219	-1.15846	3.52963	23.6104	1.17951e-06	0.00231839	1	protein_coding		100699231		GO:0071805;GO:0005267;GO:0016020;GO:0016021;GO:0006811	potassium ion transmembrane transport;potassium channel activity;membrane;integral component of membrane;ion transport	biological_process;molecular_function;cellular_component	PTHR11003_SF21	POTASSIUM CHANNEL SUBFAMILY K MEMBER 2 OUTWARD RECTIFYING POTASSIUM CHANNEL TREK 1 TREK 1 K + CHANNEL SUBUNIT TWO PORE DOMAIN POTASSIUM CHANNEL TREK 1 TWO PORE POTASSIUM CHANNEL TPKC1	GO:0005575;GO:0022857;GO:0003674;GO:0006810;GO:0055085	cellular_component;transmembrane transporter activity;molecular_function;transport;transmembrane transport
ENSONIG00000005497	SUV3-like helicase	supv3l1	20.0331	12.3722	1.62136	0.697206	4.06562	21.2697	3.98992e-06	0.00705817	2	protein_coding	ZDB-GENE-030131-2838						PTHR12131	ATP DEPENDENT RNA HELICASE MITOCHONDRIAL PRECURSOR EC_3.6.4.13
ENSONIG00000001153	solute carrier family 8 (sodium/calcium exchanger), member 1b	slc8a1b	144.83	254.084	-1.75446	-0.811029	7.62457	20.259	6.76357e-06	0.00817592	1	protein_coding	ZDB-GENE-060110-3			GO:0005432;GO:0006816;GO:0007154;GO:0055085;GO:0016021;GO:0016020;GO:0035725	calcium:sodium antiporter activity;calcium ion transport;cell communication;transmembrane transport;integral component of membrane;membrane;sodium ion transmembrane transport	molecular_function;biological_process;cellular_component	PTHR11878_SF6	SODIUM/CALCIUM EXCHANGER 1 PRECURSOR NA + /CA 2+ EXCHANGE 1 SOLUTE CARRIER FAMILY 8 MEMBER 1	GO:0005575;GO:0006810;GO:0055085;GO:0022857;GO:0003674	cellular_component;transport;transmembrane transport;transmembrane transporter activity;molecular_function
ENSONIG00000004915			34.4853	60.7961	-1.76372	-0.818618	5.48578	20.1435	7.18421e-06	0.00817592	1	protein_coding				GO:0005891;GO:0070588;GO:0005245;GO:0005216;GO:0006811;GO:0055085;GO:0016020;GO:0016021;GO:0005244;GO:0034765;GO:0005262;GO:0006816	voltage-gated calcium channel complex;calcium ion transmembrane transport;voltage-gated calcium channel activity;ion channel activity;ion transport;transmembrane transport;membrane;integral component of membrane;voltage-gated ion channel activity;regulation of ion transmembrane transport;calcium channel activity;calcium ion transport	cellular_component;biological_process;molecular_function	PTHR10037_SF161	VOLTAGE DEPENDENT N TYPE CALCIUM CHANNEL SUBUNIT ALPHA 1B BRAIN CALCIUM CHANNEL III BIII CALCIUM CHANNEL L TYPE ALPHA 1 POLYPEPTIDE 5 VOLTAGE GATED CALCIUM CHANNEL SUBUNIT ALPHA CAV2 2	GO:0005575;GO:0006810;GO:0055085;GO:0022857;GO:0003674;GO:0032991	cellular_component;transport;transmembrane transport;transmembrane transporter activity;molecular_function;protein-containing complex
ENSONIG00000013290	monoacylglycerol lipase ABHD2-A	abhd2a	62.3565	127.081	-2.03928	-1.02806	6.60566	20.0883	7.39484e-06	0.00817592	1	protein_coding	ZDB-GENE-040426-784	100698626	I3K6H1				PTHR10794	ABHYDROLASE DOMAIN CONTAINING
ENSONIG00000022741			0.254323	1.14781	-4.35184	-2.12163	-0.317721	20.5848	5.70475e-06	0.00817592	1	lincRNA
ENSONIG00000022844			14.5741	30.5415	-2.09952	-1.07006	4.28624	20.2937	6.64179e-06	0.00817592	1	lincRNA
ENSONIG00000023172			0.816258	2.25099	-2.73069	-1.44927	0.686666	20.6329	5.56326e-06	0.00817592	1	lincRNA
ENSONIG00000007647	sodium/glucose cotransporter 4	slc5a9	0.390803	8.39847	-21.2137	-4.40693	1.82201	19.5759	9.66796e-06	0.0100604	2	protein_coding	ZDB-GENE-080513-3	100706132	I3JL92;I3JL93	GO:0055085;GO:0022857;GO:0016020;GO:0016021	transmembrane transport;transmembrane transporter activity;membrane;integral component of membrane	biological_process;molecular_function;cellular_component	PTHR11819_SF96	SODIUM/GLUCOSE COTRANSPORTER 4 NA + /GLUCOSE COTRANSPORTER 4 SOLUTE CARRIER FAMILY 5 MEMBER 9	GO:0005575;GO:0022857;GO:0003674;GO:0006810;GO:0055085	cellular_component;transmembrane transporter activity;molecular_function;transport;transmembrane transport
ENSONIG00000000709	kinesin family member 17	kif17	12.7693	4.58566	2.78691	1.47867	3.27993	18.3038	1.88329e-05	0.0133261	1	protein_coding	ZDB-GENE-080724-12			GO:0007018;GO:0008017;GO:0003777;GO:0005524;GO:0000166;GO:0005874;GO:0030030;GO:0035845;GO:0042462;GO:0005871;GO:0005930;GO:0036064	microtubule-based movement;microtubule binding;microtubule motor activity;ATP binding;nucleotide binding;microtubule;cell projection organization;photoreceptor cell outer segment organization;eye photoreceptor cell development;kinesin complex;axoneme;ciliary basal body	biological_process;molecular_function;cellular_component	PTHR24115_SF415	KINESIN	GO:0003674;GO:0043167;GO:0008092;GO:0005575;GO:0048856;GO:0032991;GO:0005815	molecular_function;ion binding;cytoskeletal protein binding;cellular_component;anatomical structure development;protein-containing complex;microtubule organizing center
ENSONIG00000002433	granzyme E-like		0.0585875	0.993548	-14.6523	-3.87305	-0.697973	18.8649	1.40307e-05	0.0133261	2	protein_coding		100691703	I3J2F4;I3J2F5	GO:0004252;GO:0006508;GO:0008233;GO:0016787;GO:0008236	serine-type endopeptidase activity;proteolysis;peptidase activity;hydrolase activity;serine-type peptidase activity	molecular_function;biological_process	PTHR24271	PRECURSOR	GO:0008233	peptidase activity
ENSONIG00000003182	myosin XVAb	myo15ab	2.53392	6.55355	-2.57601	-1.36514	2.01742	18.3184	1.86895e-05	0.0133261	2	protein_coding	ZDB-GENE-090312-149			GO:0016459;GO:0003774;GO:0005856;GO:0005524;GO:0005515;GO:0000166;GO:0003779	myosin complex;motor activity;cytoskeleton;ATP binding;protein binding;nucleotide binding;actin binding	cellular_component;molecular_function	PTHR13140_SF351	UNCONVENTIONAL MYOSIN XV UNCONVENTIONAL MYOSIN 15	GO:0003674;GO:0043167;GO:0005575;GO:0043226;GO:0005856;GO:0032991;GO:0008092	molecular_function;ion binding;cellular_component;organelle;cytoskeleton;protein-containing complex;cytoskeletal protein binding
ENSONIG00000010239	semaphorin-4E	sema4e	0.344277	1.44217	-4.01649	-2.00593	0.0709788	18.4744	1.72199e-05	0.0133261	1	protein_coding	ZDB-GENE-990715-7	100709840	I3JVH7	GO:0005515;GO:0016020;GO:0016021	protein binding;membrane;integral component of membrane	molecular_function;cellular_component	PTHR11036_SF75	SEMAPHORIN 4E PRECURSOR SEMAPHORIN 7 SEMAPHORIN Z7 SEMA Z7	GO:0003674;GO:0005575	molecular_function;cellular_component
ENSONIG00000015497			24.7021	38.774	-1.57204	-0.652633	4.80121	18.4297	1.76286e-05	0.0133261	4	protein_coding			I3KEF6;I3KEF5;I3KEF7;I3KEF4	GO:0004842;GO:0007166;GO:0005509;GO:0001784;GO:0023051;GO:0016567	ubiquitin-protein transferase activity;cell surface receptor signaling pathway;calcium ion binding;phosphotyrosine residue binding;regulation of signaling;protein ubiquitination	molecular_function;biological_process	PTHR23007_SF3	E3 UBIQUITIN LIGASE CBL B EC_2.3.2.27 CASITAS B LINEAGE LYMPHOMA PROTO ONCOGENE B RING TYPE E3 UBIQUITIN TRANSFERASE CBL B SH3 BINDING CBL B SIGNAL TRANSDUCTION CBL B	GO:0003674;GO:0043167;GO:0007165;GO:0006464	molecular_function;ion binding;signal transduction;cellular protein modification process
ENSONIG00000020134	charged multivesicular body protein 3	chmp3	82.8193	53.0788	1.55973	0.641299	6.20388	18.5548	1.65086e-05	0.0133261	1	protein_coding	ZDB-GENE-040426-2600	100706149	I3KW69	GO:0007034	vacuolar transport	biological_process	PTHR10476	CHARGED MULTIVESICULAR BODY CHROMATIN MODIFYING	GO:0006810;GO:0007034	transport;vacuolar transport
ENSONIG00000021513		RF00026	0.364119	2.01013	-5.54918	-2.47227	0.126274	18.3438	1.84421e-05	0.0133261	1	snRNA
ENSONIG00000022575			0.672562	2.14104	-3.14818	-1.65452	0.837182	18.4545	1.74014e-05	0.0133261	1	lincRNA
ENSONIG00000026519			3.03262	7.73604	-2.54426	-1.34724	2.2671	18.0094	2.19816e-05	0.0149559	1	lincRNA
ENSONIG00000012496	protein phosphatase 1 regulatory subunit 3B	ppp1r3b	0.94932	0.168434	5.41181	2.43611	-0.310212	17.8378	2.4056e-05	0.0157612	1	protein_coding	ZDB-GENE-030131-5496	100700587	I3K3N9	GO:0000164;GO:0019888;GO:0005515;GO:0005981;GO:0005975;GO:0043666;GO:0005977	protein phosphatase type 1 complex;protein phosphatase regulator activity;protein binding;regulation of glycogen catabolic process;carbohydrate metabolic process;regulation of phosphoprotein phosphatase activity;glycogen metabolic process	cellular_component;molecular_function;biological_process	PTHR12307_SF13	PHOSPHATASE 1 REGULATORY SUBUNIT 3B	GO:0003674;GO:0008150;GO:0030234;GO:0032991;GO:0005575;GO:0005975;GO:0006091	molecular_function;biological_process;enzyme regulator activity;protein-containing complex;cellular_component;carbohydrate metabolic process;generation of precursor metabolites and energy
ENSONIG00000014736			2.75705	7.13824	-2.57239	-1.36311	2.48058	17.5364	2.81855e-05	0.0178072	2	protein_coding				GO:0005515	protein binding	molecular_function	PTHR19900_SF53	IMMUNOGLOBULIN SUPERFAMILY MEMBER 22 IGSF22	GO:0003674	molecular_function
ENSONIG00000007088			1.11703	8.0024	-7.16888	-2.84175	1.96639	17.3664	3.08234e-05	0.0188023	1	protein_coding				GO:0003676	nucleic acid binding	molecular_function	PTHR24377_SF240	ZINC FINGER	GO:0003674	molecular_function
ENSONIG00000022565			1.43695	4.83136	-3.34663	-1.74271	1.61861	17.1861	3.38913e-05	0.0199846	1	lincRNA
ENSONIG00000008270	single Ig and TIR domain containing	sigirr	2.94706	1.05863	2.77216	1.47101	1.06303	17.0321	3.6753e-05	0.0205313	2	protein_coding	ZDB-GENE-080303-3	100692158	I3JNG3;I3JNG2	GO:0007165;GO:0005515;GO:0016020;GO:0016021;GO:0050728;GO:0009986	signal transduction;protein binding;membrane;integral component of membrane;negative regulation of inflammatory response;cell surface	biological_process;molecular_function;cellular_component	PTHR11890	INTERLEUKIN 1 RECEPTOR PRECURSOR IL IL INTERLEUKIN 1 RECEPTOR	GO:0003674;GO:0007165;GO:0005575	molecular_function;signal transduction;cellular_component
ENSONIG00000015404	ariadne RBR E3 ubiquitin protein ligase 1	arih1	67.6965	96.181	-1.42032	-0.506216	6.35609	17.0122	3.71397e-05	0.0205313	1	protein_coding	ZDB-GENE-030131-5213	100693226	I3KE35	GO:0016567;GO:0004842;GO:0016740;GO:0046872	protein ubiquitination;ubiquitin-protein transferase activity;transferase activity;metal ion binding	biological_process;molecular_function	PTHR11685_SF10	E3 UBIQUITIN LIGASE ARIH1 EC_2.3.2.31 ARIADNE 1 HOMOLOG ARI 1 RING TYPE E3 UBIQUITIN TRANSFERASE ARIH1	GO:0006464;GO:0003674;GO:0043167	cellular protein modification process;molecular_function;ion binding
ENSONIG00000008321	dehydrogenase/reductase SDR family member 13	dhrs13b	13.5596	6.68795	2.03198	1.02288	3.38703	16.9496	3.83854e-05	0.0205769	1	protein_coding	ZDB-GENE-040801-253	100693310	I3JNM3				PTHR24320_SF53	DEHYDROGENASE/REDUCTASE SDR FAMILY MEMBER 13 PRECURSOR EC_1.1.-.- SHORT CHAIN DEHYDROGENASE/REDUCTASE FAMILY 7C MEMBER 5
ENSONIG00000007149	neural EGFL like 1	NELL1	67.3583	92.0666	-1.36594	-0.449894	6.32184	16.3012	5.40303e-05	0.0279254	1	protein_coding		100705180	I3JJH2	GO:0005509;GO:0005515	calcium ion binding;protein binding	molecular_function	PTHR24042	KINASE C BINDING NELL2 PRECURSOR NEL 2	GO:0003674;GO:0043167	molecular_function;ion binding
ENSONIG00000018767			8.31352	4.40992	1.88062	0.91121	2.85077	16.2588	5.52509e-05	0.0279254	1	protein_coding				GO:0003676	nucleic acid binding	molecular_function	PTHR24409_SF11	ZINC FINGER	GO:0003674	molecular_function
ENSONIG00000016129	RNA polymerase III subunit A	polr3a	27.6589	47.0951	-1.70174	-0.767007	5.20622	15.8665	6.79697e-05	0.0333995	1	protein_coding	ZDB-GENE-050208-103	100698561	I3KGS1	GO:0006351;GO:0003899;GO:0003677;GO:0016740;GO:0016779	transcription, DNA-templated;DNA-directed 5'-3' RNA polymerase activity;DNA binding;transferase activity;nucleotidyltransferase activity	biological_process;molecular_function	PTHR19376_SF31	DNA DIRECTED RNA POLYMERASE III SUBUNIT RPC1 RNA POLYMERASE III SUBUNIT C1 EC_2.7.7.6 DNA DIRECTED RNA POLYMERASE III LARGEST SUBUNIT RNA POLYMERASE III SUBUNIT C160	GO:0003674;GO:0003677;GO:0016779;GO:0009058;GO:0034641	molecular_function;DNA binding;nucleotidyltransferase activity;biosynthetic process;cellular nitrogen compound metabolic process	00230+2.7.7.6;00240+2.7.7.6
ENSONIG00000016398	ankyrin 2	ANK2	110.724	151.716	-1.37055	-0.454751	6.99596	15.7399	7.26764e-05	0.0347472	3	protein_coding			I3KHQ5;I3KHQ6;I3KHQ7	GO:0007165;GO:0005515	signal transduction;protein binding	biological_process;molecular_function	PTHR24123_SF17	ANKYRIN 2 ANK 2 ANKYRIN B BRAIN ANKYRIN	GO:0003674;GO:0007165	molecular_function;signal transduction
ENSONIG00000024179			0.0448721	1.28936	-25.919	-4.69594	-0.718306	14.7132	0.000125169	0.0582696	1	lincRNA
ENSONIG00000000461	dysferlin, limb girdle muscular dystrophy 2B (autosomal recessive)	dysf	7.15042	11.6494	-1.62384	-0.699413	3.20828	14.6558	0.000129034	0.0585286	1	protein_coding	ZDB-GENE-070501-1			GO:0016021;GO:0016020;GO:0001778;GO:0033292;GO:0048644;GO:0030315;GO:0042383	integral component of membrane;membrane;plasma membrane repair;T-tubule organization;muscle organ morphogenesis;T-tubule;sarcolemma	cellular_component;biological_process	PTHR12546_SF35	DYSFERLIN DYSTROPHY ASSOCIATED FER 1 FER 1 1	GO:0005575;GO:0061024;GO:0007009;GO:0048856;GO:0005886	cellular_component;membrane organization;plasma membrane organization;anatomical structure development;plasma membrane
ENSONIG00000005595	dachsous cadherin-related 1a	dchs1a	7.84808	12.9025	-1.65034	-0.722765	3.33281	14.6049	0.000132567	0.0586276	2	protein_coding	ZDB-GENE-120410-3			GO:0007155;GO:0007156;GO:0005886;GO:0005509;GO:0016020;GO:0016021	cell adhesion;homophilic cell adhesion via plasma membrane adhesion molecules;plasma membrane;calcium ion binding;membrane;integral component of membrane	biological_process;cellular_component;molecular_function	PTHR24027_SF248	CADHERIN	GO:0005575;GO:0003674;GO:0043167;GO:0005886;GO:0007155	cellular_component;molecular_function;ion binding;plasma membrane;cell adhesion
ENSONIG00000010123	egl-9 family hypoxia-inducible factor 1a	egln1a	7.32127	13.3844	-1.82477	-0.867714	3.38719	14.4615	0.000143057	0.0587314	1	protein_coding	ZDB-GENE-110408-34			GO:0031418;GO:0016705;GO:0005506;GO:0055114;GO:0016491;GO:0046872	L-ascorbic acid binding;oxidoreductase activity, acting on paired donors, with incorporation or reduction of molecular oxygen;iron ion binding;oxidation-reduction process;oxidoreductase activity;metal ion binding	molecular_function;biological_process	PTHR12907_SF4	EGL NINE HOMOLOG 1 EC_1.14.11.29 HYPOXIA INDUCIBLE FACTOR PROLYL HYDROXYLASE 2 HIF PH2 HIF PROLYL HYDROXYLASE 2 HPH 2 PROLYL HYDROXYLASE DOMAIN CONTAINING 2 PHD2 SM 20	GO:0016491;GO:0003674;GO:0043167	oxidoreductase activity;molecular_function;ion binding
ENSONIG00000010591	nitric oxide synthase 1	nos1	308.329	405.473	-1.3151	-0.395172	8.52003	14.4095	0.000147057	0.0587314	2	protein_coding	ZDB-GENE-001101-1	100534582	I3JWS0;I3JWS1	GO:0050661;GO:0005516;GO:0050660;GO:0020037;GO:0055114;GO:0016491;GO:0005515;GO:0010181;GO:0004517;GO:0006809;GO:0046872;GO:0001889;GO:0007263;GO:0021517;GO:0048668;GO:0060218	NADP binding;calmodulin binding;flavin adenine dinucleotide binding;heme binding;oxidation-reduction process;oxidoreductase activity;protein binding;FMN binding;nitric-oxide synthase activity;nitric oxide biosynthetic process;metal ion binding;liver development;nitric oxide mediated signal transduction;ventral spinal cord development;collateral sprouting;hematopoietic stem cell differentiation	molecular_function;biological_process	PTHR19384_SF63	NITRIC OXIDE SYNTHASE BRAIN EC_1.14.13.39 CONSTITUTIVE NOS NC NOS NOS TYPE I NEURONAL NOS N NOS NNOS PEPTIDYL CYSTEINE S NITROSYLASE NOS1	GO:0003674;GO:0016491;GO:0043167;GO:0009058;GO:0034641;GO:0048856;GO:0007165;GO:0040007;GO:0030154	molecular_function;oxidoreductase activity;ion binding;biosynthetic process;cellular nitrogen compound metabolic process;anatomical structure development;signal transduction;growth;cell differentiation	00460+1.14.13.39;00220+1.14.13.39;00330+1.14.13.39
ENSONIG00000013841	intraflagellar transport 27 homolog (Chlamydomonas)	ift27	19.8759	13.5984	1.46196	0.547907	4.05277	14.4259	0.000145783	0.0587314	1	protein_coding	ZDB-GENE-041212-9			GO:0003924;GO:0005525;GO:0001822;GO:0060271;GO:1902908	GTPase activity;GTP binding;kidney development;cilium assembly;regulation of melanosome transport	molecular_function;biological_process	PTHR24073_SF386	INTRAFLAGELLAR TRANSPORT 27 HOMOLOG GTP BINDING RAY RAB 4	GO:0003674;GO:0043167;GO:0003924;GO:0048856;GO:0022607	molecular_function;ion binding;GTPase activity;anatomical structure development;cellular component assembly
ENSONIG00000022521			0.321037	1.26313	-3.80508	-1.92793	-0.267241	14.4901	0.000140898	0.0587314	1	lincRNA
ENSONIG00000025718			4.51685	1.80052	2.5227	1.33497	1.62425	14.3797	0.000149402	0.0587314	2	lincRNA
ENSONIG00000023694			1.40607	3.37379	-2.41212	-1.2703	1.20307	14.331	0.000153319	0.0589612	1	lincRNA
ENSONIG00000016835	MAGI family member, X-linked b	magixb	15.1368	6.74667	2.23878	1.16271	3.49204	14.087	0.000174547	0.063239	2	protein_coding	ZDB-GENE-081105-33			GO:0005515	protein binding	molecular_function	PTHR10316_SF41	UNKNOWN	GO:0003674	molecular_function	00230+2.7.4.8
ENSONIG00000022509			14.4854	24.0353	-1.6558	-0.727527	4.14601	14.0845	0.000174779	0.063239	3	lincRNA
ENSONIG00000024212			1.59961	4.42606	-2.74389	-1.45622	1.68431	14.0803	0.000175167	0.063239	1	lincRNA
ENSONIG00000000238			0	2.19201	-319.874	-8.32136	-0.28803	13.7406	0.000209868	0.0645246	1	protein_coding							PTHR31025	UNCHARACTERIZED
ENSONIG00000000351	calcium channel, voltage-dependent, P/Q type, alpha 1A subunit, b	cacna1ab	74.32	110.521	-1.48714	-0.572539	6.46336	13.7256	0.000211556	0.0645246	2	protein_coding	ZDB-GENE-090514-3			GO:0005891;GO:0070588;GO:0005245;GO:0005216;GO:0006811;GO:0055085;GO:0005509;GO:0016020;GO:0016021;GO:0005244;GO:0034765;GO:0005262;GO:0008331;GO:0001966;GO:0006816;GO:0007274;GO:0036269	voltage-gated calcium channel complex;calcium ion transmembrane transport;voltage-gated calcium channel activity;ion channel activity;ion transport;transmembrane transport;calcium ion binding;membrane;integral component of membrane;voltage-gated ion channel activity;regulation of ion transmembrane transport;calcium channel activity;high voltage-gated calcium channel activity;thigmotaxis;calcium i…	cellular_component;biological_process;molecular_function	PTHR10037_SF59	VOLTAGE DEPENDENT P/Q TYPE CALCIUM CHANNEL SUBUNIT ALPHA 1A BRAIN CALCIUM CHANNEL I BI CALCIUM CHANNEL L TYPE ALPHA 1 POLYPEPTIDE 4 VOLTAGE GATED CALCIUM CHANNEL SUBUNIT ALPHA CAV2 1	GO:0005575;GO:0003674;GO:0043167;GO:0006810;GO:0055085;GO:0022857;GO:0032991;GO:0040011;GO:0007267	cellular_component;molecular_function;ion binding;transport;transmembrane transport;transmembrane transporter activity;protein-containing complex;locomotion;cell-cell signaling
ENSONIG00000008548	si:ch211-200p22.4	si:ch211-200p22.4	45.8191	60.1743	-1.31441	-0.39442	5.7136	13.7271	0.00021138	0.0645246	1	protein_coding	ZDB-GENE-081104-61			GO:0005543;GO:0030136;GO:0030276;GO:0048268;GO:0005545	phospholipid binding;clathrin-coated vesicle;clathrin binding;clathrin coat assembly;1-phosphatidylinositol binding	molecular_function;cellular_component;biological_process	PTHR22951	CLATHRIN ASSEMBLY	GO:0003674;GO:0043167;GO:0008289;GO:0022607;GO:0065003;GO:0005575;GO:0043226;GO:0031410	molecular_function;ion binding;lipid binding;cellular component assembly;protein-containing complex assembly;cellular_component;organelle;cytoplasmic vesicle
ENSONIG00000013103	death effector domain-containing 1	dedd1	120.945	159.606	-1.32032	-0.400883	7.09859	13.93	0.000189744	0.0645246	2	protein_coding	ZDB-GENE-000616-2			GO:0042981;GO:0006915;GO:0005515	regulation of apoptotic process;apoptotic process;protein binding	biological_process;molecular_function	PTHR15205	DNA BINDING DEATH EFFECTOR DOMAIN CONTAINING 2 DED CONTAINING FLAME 3 FADD ANTI APOPTOTIC MOLECULE 3	GO:0003674;GO:0008219	molecular_function;cell death
ENSONIG00000013562	RING finger protein B	krcp	0.984514	3.14507	-3.15625	-1.65821	1.10662	13.7734	0.000206237	0.0645246	1	protein_coding	ZDB-GENE-030131-2126	100708373	I3K7F8	GO:0005515	protein binding	molecular_function	PTHR23244_SF291	UNCHARACTERIZED	GO:0003674	molecular_function
ENSONIG00000015488	ARFGEF family member 3	arfgef3	30.289	48.1918	-1.59448	-0.673086	5.11584	13.7491	0.000208924	0.0645246	1	protein_coding	ZDB-GENE-081107-37			GO:0032012;GO:0005086	regulation of ARF protein signal transduction;ARF guanyl-nucleotide exchange factor activity	biological_process;molecular_function	TF638465	BREFELDIN A INHIBITED GUANINE NUCLEOTIDE EXCHANGE 3 ARFGEF FAMILY MEMBER 3	GO:0003674	molecular_function
ENSONIG00000018453	semaphorin-4G	sema4ga	32.365	46.1071	-1.42351	-0.509453	5.33864	13.7912	0.000204291	0.0645246	2	protein_coding	ZDB-GENE-060503-381	100710688	I3KQ36;I3KQ35	GO:0005515;GO:0016020;GO:0016021	protein binding;membrane;integral component of membrane	molecular_function;cellular_component	PTHR11036_SF17	SEMAPHORIN 4G PRECURSOR	GO:0003674;GO:0005575	molecular_function;cellular_component
ENSONIG00000020746			0.838344	3.88676	-4.6072	-2.20389	1.06108	13.9229	0.000190467	0.0645246	1	protein_coding							PTHR19446_SF301	RNA DIRECTED DNA POLYMERASE FROM MOBILE ELEMENT JOCKEY EC_2.7.7.49 REVERSE TRANSCRIPTASE
ENSONIG00000026949			0.114619	1.4174	-11.7366	-3.55294	-0.433837	13.7812	0.000205382	0.0645246	1	lincRNA
ENSONIG00000022832			0.177719	1.68223	-8.94312	-3.16078	-0.118644	13.6407	0.000221338	0.0663638	1	lincRNA
ENSONIG00000011151	transportin 1	tnpo1	21.6889	31.1426	-1.43889	-0.524952	4.65605	13.569	0.00022995	0.0677968	1	protein_coding	ZDB-GENE-080819-1			GO:0006606;GO:0006886;GO:0008536;GO:0005634;GO:0007224;GO:0061053	protein import into nucleus;intracellular protein transport;Ran GTPase binding;nucleus;smoothened signaling pathway;somite development	biological_process;molecular_function;cellular_component	PTHR10527_SF21	TRANSPORTIN 1 IMPORTIN BETA 2 KARYOPHERIN BETA 2	GO:0006810;GO:0006913;GO:0005575;GO:0043226;GO:0005634;GO:0007165;GO:0048856;GO:0009790	transport;nucleocytoplasmic transport;cellular_component;organelle;nucleus;signal transduction;anatomical structure development;embryo development
ENSONIG00000005589	PTPRF interacting protein, binding protein 2a (liprin beta 2)	ppfibp2a	2.02754	0.622373	3.22708	1.69023	0.559095	13.2358	0.000274647	0.0735377	2	protein_coding	ZDB-GENE-070705-277			GO:0005515	protein binding	molecular_function	PTHR12587	LIPRIN ALPHA TYROSINE PHOSPHATASE RECEPTOR TYPE F POLYPEPTIDE INTERACTING ALPHA PTPRF INTERACTING ALPHA	GO:0003674	molecular_function
ENSONIG00000005862	rhomboid domain containing 1	rhbdd1	1.55148	3.76836	-2.45233	-1.29415	1.66253	13.3825	0.000253988	0.0735377	1	protein_coding	ZDB-GENE-050417-85			GO:0004252;GO:0016021;GO:0016020;GO:0006508	serine-type endopeptidase activity;integral component of membrane;membrane;proteolysis	molecular_function;cellular_component;biological_process	PTHR22790_SF7	RHOMBOID RELATED 4 RRP4 EC_3.4.21.105 RHOMBOID DOMAIN CONTAINING 1 RHOMBOID 4	GO:0005575;GO:0008233	cellular_component;peptidase activity
ENSONIG00000007254	sulfotransferase family 2, cytosolic sulfotransferase 3	sult2st3 (1 of many)	7.16225	2.67678	2.66014	1.4115	2.51094	13.2536	0.000272058	0.0735377	1	protein_coding	ZDB-GENE-061117-4			GO:0008146;GO:0016740	sulfotransferase activity;transferase activity	molecular_function	PTHR11783_SF49	SULFOTRANSFERASE EC_2.8.2.-
ENSONIG00000007284	calpain 8	capn8	0.822222	2.64959	-3.13666	-1.64923	0.55673	13.2799	0.000268265	0.0735377	1	protein_coding	ZDB-GENE-050522-279			GO:0005622;GO:0006508;GO:0004198;GO:0005509;GO:0051493;GO:0008233;GO:0008234;GO:0016787	intracellular;proteolysis;calcium-dependent cysteine-type endopeptidase activity;calcium ion binding;regulation of cytoskeleton organization;peptidase activity;cysteine-type peptidase activity;hydrolase activity	cellular_component;biological_process;molecular_function	PTHR10183_SF268	CALPAIN 2 CATALYTIC SUBUNIT EC_3.4.22.53 CALCIUM ACTIVATED NEUTRAL PROTEINASE 2 CANP 2 CALPAIN M TYPE CALPAIN 2 LARGE SUBUNIT MILLIMOLAR CALPAIN M CALPAIN	GO:0003674;GO:0043167;GO:0005575;GO:0005622;GO:0008233	molecular_function;ion binding;cellular_component;intracellular;peptidase activity
ENSONIG00000008410	ubiquitin-conjugating enzyme E2 Q2	ube2q2	39.9447	54.5725	-1.36475	-0.448636	5.56818	13.2096	0.00027852	0.0735377	1	protein_coding	ZDB-GENE-040426-1919	100695995	I3JNX9				PTHR24068_SF35	UBIQUITIN CONJUGATING ENZYME E2 Q2 EC_2.3.2.23 E2 UBIQUITIN CONJUGATING ENZYME Q2 UBIQUITIN CARRIER Q2 UBIQUITIN LIGASE Q2
ENSONIG00000008715	A disintegrin and metalloproteinase with thrombospondin motifs 20	ADAMTS20	12.2746	6.59315	1.85674	0.892775	3.09716	13.3252	0.000261864	0.0735377	2	protein_coding		100709964	I3JQ11;I3JQ10	GO:0004222;GO:0008237;GO:0008270;GO:0006508	metalloendopeptidase activity;metallopeptidase activity;zinc ion binding;proteolysis	molecular_function;biological_process	PTHR13723_SF165	A DISINTEGRIN AND METALLOPROTEINASE WITH THROMBOSPONDIN MOTIFS 20 PRECURSOR ADAM TS 20 ADAM TS20 ADAMTS 20 EC_3.4.24.-	GO:0003674;GO:0043167;GO:0008233	molecular_function;ion binding;peptidase activity
ENSONIG00000014459	homeobox protein orthopedia B	otpb	37.8441	26.5555	1.42565	0.511618	4.92799	13.2312	0.000275321	0.0735377	1	protein_coding	ZDB-GENE-990708-7	100704442	I3KAN4	GO:0043565;GO:0006355;GO:0003677;GO:0005634;GO:0007275;GO:0021767;GO:0021854;GO:0021884;GO:0030182	sequence-specific DNA binding;regulation of transcription, DNA-templated;DNA binding;nucleus;multicellular organism development;mammillary body development;hypothalamus development;forebrain neuron development;neuron differentiation	molecular_function;biological_process;cellular_component	PTHR24329_SF274	HOMEOBOX ORTHOPEDIA	GO:0003674;GO:0003677;GO:0005575;GO:0043226;GO:0005634;GO:0048856;GO:0030154	molecular_function;DNA binding;cellular_component;organelle;nucleus;anatomical structure development;cell differentiation
ENSONIG00000022678			21.1411	29.0482	-1.37418	-0.458568	4.67005	13.1609	0.000285853	0.0743637	1	lincRNA
ENSONIG00000005996	solute carrier family 45, member 4	slc45a4	1.00567	2.73194	-2.73396	-1.45099	1.15899	12.98	0.000314835	0.0784428	1	protein_coding	ZDB-GENE-091230-5			GO:0055085;GO:0016021;GO:0016020	transmembrane transport;integral component of membrane;membrane	biological_process;cellular_component	PTHR19432	SOLUTE CARRIER FAMILY 45 MEMBER	GO:0005575;GO:0006810;GO:0055085	cellular_component;transport;transmembrane transport
ENSONIG00000012756	leukocyte receptor cluster (LRC) member 8	leng8	72.923	99.6408	-1.36756	-0.451609	6.33629	12.9952	0.000312291	0.0784428	3	protein_coding	ZDB-GENE-070410-6						PTHR12436_SF4	LEUKOCYTE RECEPTOR CLUSTER MEMBER 8
ENSONIG00000023261			5.23534	2.47374	2.11902	1.0834	1.92382	12.9923	0.000312769	0.0784428	1	lincRNA
ENSONIG00000019591	solute carrier family 8 member A3	slc8a3	34.5273	49.1388	-1.42446	-0.510414	5.44366	12.9326	0.00032291	0.078726	2	protein_coding	ZDB-GENE-050810-1	100707890	I3KU69;I3KU70	GO:0005432;GO:0006816;GO:0007154;GO:0055085;GO:0016021;GO:0016020;GO:0035725	calcium:sodium antiporter activity;calcium ion transport;cell communication;transmembrane transport;integral component of membrane;membrane;sodium ion transmembrane transport	molecular_function;biological_process;cellular_component	PTHR11878_SF7	SODIUM/CALCIUM EXCHANGER 3 PRECURSOR NA + /CA 2+ EXCHANGE 3 SOLUTE CARRIER FAMILY 8 MEMBER 3	GO:0005575;GO:0006810;GO:0055085;GO:0022857;GO:0003674	cellular_component;transport;transmembrane transport;transmembrane transporter activity;molecular_function
ENSONIG00000020210	whirlin b	whrnb	32.9522	53.0845	-1.61287	-0.689632	5.43807	12.9213	0.000324873	0.078726	2	protein_coding	ZDB-GENE-060526-377			GO:0007605;GO:0005515;GO:0050953	sensory perception of sound;protein binding;sensory perception of light stimulus	biological_process;molecular_function	PTHR23116	PDZ DOMAIN CONTAINING	GO:0003674;GO:0050877	molecular_function;nervous system process
ENSONIG00000011691			0.41757	1.36626	-3.21411	-1.68442	-0.0784224	12.7074	0.000364206	0.0845092	3	protein_coding				GO:0005515;GO:0000166;GO:0005524	protein binding;nucleotide binding;ATP binding	molecular_function	PTHR24106_SF58	AMBIGUOUS	GO:0003674;GO:0043167	molecular_function;ion binding
ENSONIG00000016533	inter-alpha-trypsin inhibitor heavy chain family member 6	itih6	1.91336	0.496453	3.79441	1.92388	0.662802	12.6897	0.000367671	0.0845092	2	protein_coding	ZDB-GENE-050603-1	100700703	I3KI76;I3KI77	GO:0004867;GO:0030212;GO:0010951	serine-type endopeptidase inhibitor activity;hyaluronan metabolic process;negative regulation of endopeptidase activity	molecular_function;biological_process	PTHR10338_SF10	INTER ALPHA TRYPSIN INHIBITOR HEAVY CHAIN H6 PRECURSOR INTER ALPHA TRYPSIN INHIBITOR HEAVY CHAIN H5 INTER ALPHA INHIBITOR H5	GO:0003674;GO:0030234;GO:0044281	molecular_function;enzyme regulator activity;small molecule metabolic process
ENSONIG00000020221			4.00383	1.03648	3.85844	1.94802	1.1715	12.7159	0.000362565	0.0845092	1	protein_coding				GO:0003676	nucleic acid binding	molecular_function	PTHR23080_SF34	UNCHARACTERIZED	GO:0003674	molecular_function
ENSONIG00000026398			0.733351	2.24734	-3.04307	-1.60553	0.45337	12.6888	0.000367847	0.0845092	1	lincRNA
ENSONIG00000005500			108.393	158.592	-1.46326	-0.549185	7.01396	12.5766	0.000390607	0.0853145	1	protein_coding				GO:0016020;GO:0016021	membrane;integral component of membrane	cellular_component	PTHR19325_SF323	CUB AND SUSHI DOMAIN CONTAINING 1 PRECURSOR CUB AND SUSHI MULTIPLE DOMAINS 1	GO:0005575	cellular_component
ENSONIG00000012642	DCC netrin 1 receptor	dcc	15.5233	23.4523	-1.51085	-0.595359	4.19327	12.5764	0.000390643	0.0853145	1	protein_coding	ZDB-GENE-011101-2			GO:0007399;GO:0007411;GO:0016021;GO:0006915;GO:0005515;GO:0005042;GO:0016020;GO:0038006;GO:0016358;GO:0021952;GO:0021960;GO:0030516;GO:0031103;GO:0033564;GO:0038007;GO:0048665;GO:0048846;GO:0050918;GO:0071678	nervous system development;axon guidance;integral component of membrane;apoptotic process;protein binding;netrin receptor activity;membrane;netrin receptor activity involved in chemoattraction;dendrite development;central nervous system projection neuron axonogenesis;anterior commissure morphogenesis;regulation of axon extension;axon regeneration;anterior/posterior axon guidance;netrin-activated …	biological_process;cellular_component;molecular_function	PTHR10489_SF68	NETRIN RECEPTOR DCC PRECURSOR TUMOR SUPPRESSOR DCC	GO:0003674;GO:0008219;GO:0005575;GO:0048856;GO:0040011;GO:0006950;GO:0007165;GO:0040007	molecular_function;cell death;cellular_component;anatomical structure development;locomotion;response to stress;signal transduction;growth
ENSONIG00000014067	si:ch211-161h7.8	si:ch211-161h7.8 (1 of many)	22.4773	14.3889	1.56527	0.64641	4.28354	12.5959	0.000386594	0.0853145	1	protein_coding	ZDB-GENE-091204-302						PTHR13253_SF12	UNCHARACTERIZED
ENSONIG00000023726			0.725599	2.51369	-3.45232	-1.78757	0.663937	12.646	0.000376379	0.0853145	1	lincRNA
ENSONIG00000009124	programmed cell death 1 ligand 1		0.332374	4.33139	-12.7882	-3.67675	1.0717	12.5116	0.000404428	0.087248	1	protein_coding		102078530
ENSONIG00000006903	barrier-to-autointegration factor-like protein		11.1645	4.80074	2.32383	1.21651	2.87295	12.4425	0.000419668	0.0894449	1	protein_coding		102076719	I3JIL4	GO:0003677	DNA binding	molecular_function	TF661058	BARRIER TO AUTOINTEGRATION FACTOR	GO:0003674;GO:0003677	molecular_function;DNA binding
ENSONIG00000003179	mitochondrial elongation factor 2	mief2	47.4298	36.2942	1.3083	0.387695	5.39655	12.2983	0.000453365	0.0921841	2	protein_coding	ZDB-GENE-060929-864			GO:0016020;GO:0016021	membrane;integral component of membrane	cellular_component	PTHR16451	MITOCHONDRIAL DYNAMICS MID51 MITOCHONDRIAL DYNAMICS OF 51 KDA HOMOLOG MITOCHONDRIAL ELONGATION FACTOR 1 SMITH MAGENIS SYNDROME CHROMOSOMAL REGION CANDIDATE GENE 7	GO:0005575	cellular_component
ENSONIG00000005692	ryanodine receptor 3	ryr3	46.7135	69.5649	-1.48922	-0.574555	5.8039	12.3265	0.000446581	0.0921841	1	protein_coding	ZDB-GENE-041001-165		I3JE80	GO:0006816;GO:0006874;GO:0005219;GO:0005262;GO:0070588;GO:0005216;GO:0006811;GO:0055085;GO:0016021;GO:0016020;GO:0005515;GO:0005623;GO:0051209	calcium ion transport;cellular calcium ion homeostasis;ryanodine-sensitive calcium-release channel activity;calcium channel activity;calcium ion transmembrane transport;ion channel activity;ion transport;transmembrane transport;integral component of membrane;membrane;protein binding;cell;release of sequestered calcium ion into cytosol	biological_process;molecular_function;cellular_component	PTHR13715_SF16	RYANODINE RECEPTOR 3 RYR 3 RYR3 BRAIN RYANODINE RECEPTOR CALCIUM RELEASE CHANNEL BRAIN TYPE RYANODINE RECEPTOR TYPE 3 RYANODINE RECEPTOR	GO:0003674;GO:0005575;GO:0006810;GO:0055085;GO:0022857;GO:0042592;GO:0005623	molecular_function;cellular_component;transport;transmembrane transport;transmembrane transporter activity;homeostatic process;cell
ENSONIG00000007210	secretagogin		221.931	165.934	1.33747	0.419506	7.60712	12.3044	0.000451903	0.0921841	2	protein_coding		100708303	I3JJP8;I3JJP7	GO:0005509	calcium ion binding	molecular_function	PTHR19972	SECRETAGOGIN	GO:0003674;GO:0043167	molecular_function;ion binding
ENSONIG00000010217	methyl-CpG-binding domain protein 3	mbd3a	28.8328	21.529	1.34081	0.423106	4.67664	12.3317	0.000445336	0.0921841	1	protein_coding	ZDB-GENE-030131-9077	100698109	I3JVF0	GO:0016581;GO:0008327	NuRD complex;methyl-CpG binding	cellular_component;molecular_function	PTHR12396	METHYL CPG BINDING DOMAIN 3 MBD3	GO:0032991;GO:0005575;GO:0003674;GO:0003677	protein-containing complex;cellular_component;molecular_function;DNA binding
ENSONIG00000003823	leucine rich repeat kinase 2	lrrk2	25.729	34.4173	-1.33941	-0.421594	4.95531	12.258	0.000463262	0.0931262	2	protein_coding	ZDB-GENE-071218-6	100693798	I3J7H5;I3J7H6	GO:0006468;GO:0004672;GO:0005524;GO:0005525;GO:0005515	protein phosphorylation;protein kinase activity;ATP binding;GTP binding;protein binding	biological_process;molecular_function	PTHR23257_SF417	LEUCINE RICH REPEAT SERINE/THREONINE KINASE 2 EC_2.7.11.1	GO:0003674;GO:0043167;GO:0016301;GO:0006464	molecular_function;ion binding;kinase activity;cellular protein modification process	04151+2.7.11.1;04150+2.7.11.1;05165+2.7.11.1;04926+2.7.11.1;04714+2.7.11.1;05170+2.7.11.1;05163+2.7.11.1
ENSONIG00000003800	nucleolar complex associated 4 homolog	noc4l	17.8943	12.3374	1.45114	0.537185	3.9558	12.0244	0.00052508	0.0998053	1	protein_coding	ZDB-GENE-050522-98	100704416	I3J7D9	GO:0042254;GO:0016020;GO:0016021	ribosome biogenesis;membrane;integral component of membrane	biological_process;cellular_component	PTHR12455	NUCLEOLAR COMPLEX 4 HOMOLOG NOC4 HOMOLOG NOC4 NUCLEOLAR COMPLEX ASSOCIATED 4	GO:0042254;GO:0005575	ribosome biogenesis;cellular_component
ENSONIG00000003892	ryanodine receptor 1	ryr1b	43.188	58.3685	-1.3525	-0.43563	5.71579	12.0201	0.000526302	0.0998053	1	protein_coding	ZDB-GENE-070705-417	100709030	I3J7R3	GO:0006816;GO:0006874;GO:0005219;GO:0005262;GO:0070588;GO:0005216;GO:0006811;GO:0055085;GO:0016021;GO:0005509;GO:0016020;GO:0005515;GO:0005623;GO:0051209;GO:0008345;GO:0031443;GO:0034599	calcium ion transport;cellular calcium ion homeostasis;ryanodine-sensitive calcium-release channel activity;calcium channel activity;calcium ion transmembrane transport;ion channel activity;ion transport;transmembrane transport;integral component of membrane;calcium ion binding;membrane;protein binding;cell;release of sequestered calcium ion into cytosol;larval locomotory behavior;fast-twitch ske…	biological_process;molecular_function;cellular_component	PTHR13715_SF15	RYANODINE RECEPTOR 1 RYR 1 RYR1 SKELETAL MUSCLE CALCIUM RELEASE CHANNEL SKELETAL MUSCLE RYANODINE RECEPTOR SKELETAL MUSCLE TYPE RYANODINE RECEPTOR TYPE 1 RYANODINE RECEPTOR	GO:0003674;GO:0005575;GO:0043167;GO:0006810;GO:0055085;GO:0022857;GO:0042592;GO:0005623;GO:0006950	molecular_function;cellular_component;ion binding;transport;transmembrane transport;transmembrane transporter activity;homeostatic process;cell;response to stress
ENSONIG00000003974			15.846	8.15445	1.95094	0.964167	3.55334	11.9053	0.000559754	0.0998053	1	protein_coding
ENSONIG00000004344	DENN domain containing 6A	dennd6aa	11.6588	17.1648	-1.47876	-0.564385	3.8514	11.8906	0.000564191	0.0998053	1	protein_coding	ZDB-GENE-041010-63	100710060	I3J9D6	GO:0017112	Rab guanyl-nucleotide exchange factor activity	molecular_function	PTHR13677	DENN DOMAIN CONTAINING	GO:0003674	molecular_function
ENSONIG00000005665	microtubule associated scaffold protein 2		49.5684	64.1056	-1.29423	-0.372098	5.79934	12.068	0.000512951	0.0998053	3	protein_coding		100696198	I3JE43;I3JE42;I3JE41				PTHR24200	MICROTUBULE ASSOCIATED TUMOR SUPPRESSOR 1 MITOCHONDRIAL TUMOR SUPPRESSOR 1
ENSONIG00000006968	diacylglycerol kinase delta	si:dkey-172j4.3	436.115	554.074	-1.27047	-0.345366	9.02141	12.0435	0.000519746	0.0998053	2	protein_coding	ZDB-GENE-081104-24	100708735	I3JIU3;I3JIU4	GO:0016301;GO:0035556;GO:0007165;GO:0003951;GO:0004143;GO:0007205;GO:0016740;GO:0000166;GO:0005524;GO:0016310	kinase activity;intracellular signal transduction;signal transduction;NAD+ kinase activity;diacylglycerol kinase activity;protein kinase C-activating G protein-coupled receptor signaling pathway;transferase activity;nucleotide binding;ATP binding;phosphorylation	molecular_function;biological_process	PTHR11255_SF33	DIACYLGLYCEROL KINASE DAG KINASE EC_2.7.1.107	GO:0007165;GO:0016301;GO:0003674;GO:0043167	signal transduction;kinase activity;molecular_function;ion binding	00564+2.7.1.107;00561+2.7.1.107;04070+2.7.1.107
ENSONIG00000007421			0.548715	2.55376	-4.71414	-2.23699	0.837554	11.9549	0.000545029	0.0998053	1	protein_coding				GO:0005515	protein binding	molecular_function	PTHR24106_SF58	AMBIGUOUS	GO:0003674	molecular_function
ENSONIG00000020019	myosin phosphatase Rho interacting protein	MPRIP	635.639	829.615	-1.30519	-0.384259	9.53513	11.9265	0.000553401	0.0998053	2	protein_coding			I3KVR3;I3KVR4				PTHR17271_SF9	MYOSIN PHOSPHATASE RHO INTERACTING RHO INTERACTING 3 RIP3 P116RIP
ENSONIG00000020020			0.0103374	9.55852	-551.025	-9.10597	2.08863	11.9707	0.000540448	0.0998053	1	protein_coding				GO:0007010;GO:0003779;GO:0046872	cytoskeleton organization;actin binding;metal ion binding	biological_process;molecular_function	PTHR24213	ACTIN BINDING LIM ABLIM ACTIN BINDING LIM FAMILY MEMBER	GO:0003674;GO:0008092;GO:0007010;GO:0043167	molecular_function;cytoskeletal protein binding;cytoskeleton organization;ion binding
ENSONIG00000023492			34.7929	23.5901	1.4742	0.559934	4.89947	11.9157	0.000556624	0.0998053	2	lincRNA
ENSONIG00000024417			13.6606	8.86111	1.53325	0.616594	3.58952	12.0238	0.00052525	0.0998053	2	lincRNA
ENSONIG00000024770			0.487662	1.64465	-3.26489	-1.70703	-0.144741	11.9274	0.000553129	0.0998053	1	lincRNA
ENSONIG00000016155	ecto-NOX disulfide-thiol exchanger 1	enox1	83.3485	105.572	-1.2672	-0.34165	6.60565	11.8685	0.000570927	0.0999971	2	protein_coding	ZDB-GENE-081104-328	100697884	I3KGV2;I3KGV3	GO:0009897;GO:0007624;GO:0003676;GO:0016491;GO:0003723;GO:0055114;GO:0001944	external side of plasma membrane;ultradian rhythm;nucleic acid binding;oxidoreductase activity;RNA binding;oxidation-reduction process;vasculature development	cellular_component;biological_process;molecular_function	PTHR16001	ECTO NOX DISULFIDE THIOL EXCHANGER 2 APK1 ANTIGEN CYTOSOLIC OVARIAN CARCINOMA ANTIGEN 1 TUMOR ASSOCIATED HYDROQUINONE OXIDASE TNOX [INCLUDES HYDROQUINONE [NADH] OXIDASE EC 1 ; DISULFIDE THIOL OXIDOREDUCTASE EC 1 ]	GO:0016491;GO:0003674;GO:0005575;GO:0003723;GO:0048856	oxidoreductase activity;molecular_function;cellular_component;RNA binding;anatomical structure development
ENSONIG00000013794	lysyl oxidase		8.32108	4.82385	1.72651	0.787859	2.79602	11.8222	0.000585277	0.101505	1	protein_coding		100708791	I3K8A2	GO:0016641;GO:0005507;GO:0055114	oxidoreductase activity, acting on the CH-NH2 group of donors, oxygen as acceptor;copper ion binding;oxidation-reduction process	molecular_function;biological_process	PTHR19331_SF3	LYSINE 6 OXIDASE EC_1.4.3.13 LYSYL OXIDASE	GO:0003674;GO:0043167	molecular_function;ion binding
ENSONIG00000004352	filamin B	FLNB	4.01297	7.52643	-1.88645	-0.915671	2.56313	11.7839	0.00059744	0.102609	1	protein_coding			I3J9E4	GO:0030154;GO:0030036;GO:0003779;GO:0005515	cell differentiation;actin cytoskeleton organization;actin binding;protein binding	biological_process;molecular_function	PTHR11915_SF238	FILAMIN B FLN B ABP 280 ACTIN BINDING BETA FILAMIN	GO:0003674;GO:0008092;GO:0007010;GO:0030154	molecular_function;cytoskeletal protein binding;cytoskeleton organization;cell differentiation
ENSONIG00000003586	P2Y purinoceptor 13	p2ry13	1.24639	0.241573	5.16871	2.3698	-0.149488	11.6581	0.000639246	0.108733	1	protein_coding	ZDB-GENE-110208-5	100693192	I3J6M2	GO:0045028;GO:0016021;GO:0007186;GO:0004930;GO:0007194;GO:0016020;GO:0007165;GO:0035589	G protein-coupled purinergic nucleotide receptor activity;integral component of membrane;G protein-coupled receptor signaling pathway;G protein-coupled receptor activity;negative regulation of adenylate cyclase activity;membrane;signal transduction;G protein-coupled purinergic nucleotide receptor signaling pathway	molecular_function;cellular_component;biological_process	PTHR24233	RECEPTOR	GO:0003674;GO:0007165;GO:0005575	molecular_function;signal transduction;cellular_component
ENSONIG00000016003	non-SMC condensin I complex, subunit H	ncaph	23.1565	9.28819	2.48991	1.31609	3.96463	11.5908	0.000662804	0.111667	2	protein_coding	ZDB-GENE-070112-652			GO:0016192;GO:0016021;GO:0007076;GO:0000796;GO:0016020;GO:0051301;GO:0007049;GO:0030261;GO:0000070	vesicle-mediated transport;integral component of membrane;mitotic chromosome condensation;condensin complex;membrane;cell division;cell cycle;chromosome condensation;mitotic sister chromatid segregation	biological_process;cellular_component	PTHR13108	CONDENSIN COMPLEX SUBUNIT 2 BARREN HOMOLOG 1 CHROMOSOME ASSOCIATED H H NON SMC CONDENSIN I COMPLEX SUBUNIT H XCAP H HOMOLOG	GO:0005575;GO:0006810;GO:0016192;GO:0051276;GO:0032991;GO:0051301;GO:0007049;GO:0007059	cellular_component;transport;vesicle-mediated transport;chromosome organization;protein-containing complex;cell division;cell cycle;chromosome segregation
ENSONIG00000024088			7.71385	4.12674	1.86731	0.90096	2.58491	11.545	0.000679301	0.113366	1	lincRNA
ENSONIG00000009573	calcium channel, voltage-dependent, R type, alpha 1E subunit b	cacna1eb	287.652	376.592	-1.30932	-0.388816	8.39681	11.5164	0.000689835	0.113678	1	protein_coding	ZDB-GENE-070705-133			GO:0005891;GO:0070588;GO:0005245;GO:0005216;GO:0006811;GO:0055085;GO:0016020;GO:0016021;GO:0005244;GO:0034765;GO:0005262;GO:0006816	voltage-gated calcium channel complex;calcium ion transmembrane transport;voltage-gated calcium channel activity;ion channel activity;ion transport;transmembrane transport;membrane;integral component of membrane;voltage-gated ion channel activity;regulation of ion transmembrane transport;calcium channel activity;calcium ion transport	cellular_component;biological_process;molecular_function	PTHR10037_SF57	VOLTAGE DEPENDENT R TYPE CALCIUM CHANNEL SUBUNIT ALPHA 1E BRAIN CALCIUM CHANNEL II CALCIUM CHANNEL L TYPE ALPHA 1 POLYPEPTIDE 6 VOLTAGE GATED CALCIUM CHANNEL SUBUNIT ALPHA CAV2 3	GO:0005575;GO:0006810;GO:0055085;GO:0022857;GO:0003674;GO:0032991	cellular_component;transport;transmembrane transport;transmembrane transporter activity;molecular_function;protein-containing complex
ENSONIG00000015281	protein FAM184A	zgc:85722	31.6827	44.7872	-1.41303	-0.498793	5.26782	11.5052	0.000694022	0.113678	1	protein_coding	ZDB-GENE-040516-7	100706589	I3KDN3				PTHR18870	UNKNOWN
ENSONIG00000002742	chemokine-like receptor 1		1.04808	0.295696	3.47529	1.79713	-0.296075	11.2951	0.00077711	0.117496	1	protein_coding		100698787	I3J3J7	GO:0016021;GO:0007186;GO:0004930;GO:0016020;GO:0007165	integral component of membrane;G protein-coupled receptor signaling pathway;G protein-coupled receptor activity;membrane;signal transduction	cellular_component;biological_process;molecular_function	PTHR24225	RECEPTOR	GO:0003674;GO:0007165;GO:0005575	molecular_function;signal transduction;cellular_component
ENSONIG00000004868	hydroxysteroid 11-beta-dehydrogenase 1-like protein	hsd11b1la (1 of many)	15.9251	10.6984	1.49677	0.581851	3.69809	11.3257	0.000764437	0.117496	1	protein_coding	ZDB-GENE-040426-1002	100710599	I3JB84	GO:0016491;GO:0055114	oxidoreductase activity;oxidation-reduction process	molecular_function;biological_process	PTHR24322_SF269	HYDROXYSTEROID 11 BETA DEHYDROGENASE 1 PRECURSOR EC_1.1.1.- 11 BETA HYDROXYSTEROID DEHYDROGENASE TYPE 3 11 DH3 11 BETA HSD3	GO:0016491	oxidoreductase activity
ENSONIG00000007510			8.51996	13.9593	-1.62855	-0.703586	3.4822	11.3195	0.000766968	0.117496	1	protein_coding							PTHR10314_SF17	UNCHARACTERIZED
ENSONIG00000008260	bromodomain PHD finger transcription factor	bptf	49.5096	63.2816	-1.27861	-0.354575	5.78474	11.2982	0.000775826	0.117496	1	protein_coding	ZDB-GENE-030131-3200			GO:0005515;GO:0016589;GO:0035064;GO:0046872	protein binding;NURF complex;methylated histone binding;metal ion binding	molecular_function;cellular_component	PTHR22880_SF5	NUCLEOSOME REMODELING FACTOR SUBUNIT FACTOR	GO:0003674;GO:0032991;GO:0005575;GO:0042393;GO:0043167	molecular_function;protein-containing complex;cellular_component;histone binding;ion binding
ENSONIG00000014347	solute carrier family 6 member 1	slc6a1b	475.439	335.72	1.41596	0.501785	8.70279	11.3041	0.00077336	0.117496	1	protein_coding	ZDB-GENE-041114-57	100690061	I3KA94	GO:0005328;GO:0006836;GO:0005887;GO:0016021;GO:0016020;GO:0005332;GO:0055085;GO:0015293;GO:0015812	neurotransmitter:sodium symporter activity;neurotransmitter transport;integral component of plasma membrane;integral component of membrane;membrane;gamma-aminobutyric acid:sodium symporter activity;transmembrane transport;symporter activity;gamma-aminobutyric acid transport	molecular_function;biological_process;cellular_component	PTHR11616_SF138	SODIUM AND CHLORIDE DEPENDENT GABA TRANSPORTER 1 GAT 1 SOLUTE CARRIER FAMILY 6 MEMBER 1	GO:0005575;GO:0006810;GO:0022857;GO:0003674;GO:0055085	cellular_component;transport;transmembrane transporter activity;molecular_function;transmembrane transport
ENSONIG00000017088	centromere protein F	cenpf	10.1578	14.9244	-1.47039	-0.556194	3.68927	11.3365	0.000759991	0.117496	3	protein_coding	ZDB-GENE-041111-205	100698969	I3KKA2;I3KKA4;I3KKA3	GO:0042803;GO:0008134;GO:0070840;GO:0001822;GO:0001947;GO:0021591;GO:0060271	protein homodimerization activity;transcription factor binding;dynein complex binding;kidney development;heart looping;ventricular system development;cilium assembly	molecular_function;biological_process	PTHR18874	CENTROMERE F PRECURSOR CENP F AH ANTIGEN KINETOCHORE CENPF MITOSIN	GO:0003674;GO:0008134;GO:0048856;GO:0022607	molecular_function;transcription factor binding;anatomical structure development;cellular component assembly
ENSONIG00000018785	transmembrane channel like 6	TMC6	8.8113	4.84102	1.81622	0.860935	2.81154	11.3372	0.000759712	0.117496	2	protein_coding		100705089	I3KRA6;I3KRA7	GO:0005887;GO:0016021;GO:0016020	integral component of plasma membrane;integral component of membrane;membrane	cellular_component	PTHR23302	TRANSMEMBRANE CHANNEL	GO:0005575	cellular_component
ENSONIG00000019195	MCF.2 cell line derived transforming sequence-like 2	mcf2l2	54.2537	72.2498	-1.33247	-0.414107	5.97837	11.3224	0.000765779	0.117496	1	protein_coding	ZDB-GENE-100812-1			GO:0005085;GO:0035556;GO:0035023;GO:0005089	guanyl-nucleotide exchange factor activity;intracellular signal transduction;regulation of Rho protein signal transduction;Rho guanyl-nucleotide exchange factor activity	molecular_function;biological_process	PTHR22826_SF89	PROBABLE GUANINE NUCLEOTIDE EXCHANGE FACTOR MC DBS RELATED RHO FAMILY GUANINE NUCLEOTIDE EXCHANGE FACTOR MCF2 TRANSFORMING SEQUENCE 2	GO:0003674;GO:0007165	molecular_function;signal transduction
ENSONIG00000026855			0.594738	2.95868	-5.00683	-2.3239	0.460633	11.3328	0.00076151	0.117496	2	lincRNA
ENSONIG00000000434	survival motor neuron domain containing 1	smndc1	177.939	143.696	1.23871	0.308837	7.41886	11.2399	0.000800591	0.120021	1	protein_coding	ZDB-GENE-030131-614	100697211	I3IVB0	GO:0006397;GO:0005737;GO:0003723;GO:0005634	mRNA processing;cytoplasm;RNA binding;nucleus	biological_process;cellular_component;molecular_function	PTHR12664	SURVIVAL OF MOTOR NEURON RELATED SPLICING FACTOR 30 SURVIVAL MOTOR NEURON DOMAIN CONTAINING 1	GO:0005575;GO:0043226;GO:0005634;GO:0003674;GO:0003723;GO:0005737;GO:0034641;GO:0006397	cellular_component;organelle;nucleus;molecular_function;RNA binding;cytoplasm;cellular nitrogen compound metabolic process;mRNA processing
ENSONIG00000006104	tripartite motif containing 66	trim66	45.5079	59.4977	-1.30769	-0.387023	5.76913	11.193	0.000821079	0.122058	1	protein_coding	ZDB-GENE-040724-145			GO:0008270;GO:0005622;GO:0005515;GO:0046872	zinc ion binding;intracellular;protein binding;metal ion binding	molecular_function;cellular_component	PTHR24103_SF121	TRIPARTITE MOTIF CONTAINING 66	GO:0003674;GO:0005575;GO:0005622;GO:0043167	molecular_function;cellular_component;intracellular;ion binding
ENSONIG00000000501	Scm polycomb group protein like 4	scml4	44.3232	32.1551	1.37647	0.460973	5.32082	11.1259	0.000851299	0.123438	2	protein_coding	ZDB-GENE-041210-338			GO:0005515;GO:0016020;GO:0016021;GO:0060216	protein binding;membrane;integral component of membrane;definitive hemopoiesis	molecular_function;cellular_component;biological_process	PTHR12247_SF6	SEX COMB ON MIDLEG 4	GO:0003674;GO:0005575;GO:0048856	molecular_function;cellular_component;anatomical structure development
ENSONIG00000011080	splicing regulatory glutamine/lysine-rich protein 1	srek1	51.4502	66.8278	-1.30003	-0.378541	5.88961	11.1564	0.000837428	0.123438	3	protein_coding	ZDB-GENE-040801-132			GO:0003676;GO:0000381;GO:0003723	nucleic acid binding;regulation of alternative mRNA splicing, via spliceosome;RNA binding	molecular_function;biological_process	PTHR32343	SERINE/ARGININE RICH SPLICING SPLICING FACTOR ARGININE/SERINE RICH	GO:0003674;GO:0003723	molecular_function;RNA binding
ENSONIG00000012031	alpha-1,6-mannosylglycoprotein 6-beta-N-acetylglucosaminyltransferase	mgat5	22.231	29.7009	-1.33782	-0.419879	4.68959	11.1292	0.000849782	0.123438	1	protein_coding	ZDB-GENE-060616-238	100691248	I3K1Z9	GO:0006487;GO:0030144;GO:0016020;GO:0016021;GO:0042246;GO:0070658	protein N-linked glycosylation;alpha-1,6-mannosylglycoprotein 6-beta-N-acetylglucosaminyltransferase activity;membrane;integral component of membrane;tissue regeneration;neuromast hair cell differentiation involved in neuromast regeneration	biological_process;molecular_function;cellular_component	PTHR15075	ALPHA 1 6 MANNOSYLGLYCOPROTEIN 6 BETA N ACETYLGLUCOSAMINYLTRANSFERASE A PRECURSOR EC_2.4.1.155 ALPHA MANNOSIDE BETA 1 6 N ACETYLGLUCOSAMINYLTRANSFERASE GLCNAC T V GNT V MANNOSIDE ACETYLGLUCOSAMINYLTRANSFERASE 5 N ACETYLGLUCOSAMINYL TRANSFERASE V [CONTAINS SECRETED ALPHA 1 6 MANNOSYLGLYCOPROTEIN 6 BETA N ACETYLGLUCOSAMINYLTRANSFERASE A SECRETED BETA 1 6 N ACETYLGLUCOSAMINYLTRANSFERASE V SECRETED G…	GO:0006464;GO:0016757;GO:0005575;GO:0048856;GO:0040007;GO:0030154	cellular protein modification process;transferase activity, transferring glycosyl groups;cellular_component;anatomical structure development;growth;cell differentiation	00510+2.4.1.155
ENSONIG00000014619	RCC1 domain containing 1	rccd1	13.548	19.7134	-1.45315	-0.53918	4.02188	11.0858	0.000869932	0.125115	1	protein_coding	ZDB-GENE-030131-3552						PTHR22870_SF171	UNCHARACTERIZED
ENSONIG00000022345			32.4327	44.9137	-1.38069	-0.465393	5.26413	11.0656	0.00087945	0.125464	1	lincRNA
ENSONIG00000016079			0.283269	1.007	-3.42135	-1.77457	-0.507591	11.0474	0.000888134	0.125689	1	protein_coding
ENSONIG00000014176	beta-2-microglobulin		256.403	186.635	1.3737	0.458071	7.77088	11.0134	0.000904549	0.126996	1	protein_coding		100697370	I3K9M4	GO:0006955;GO:0042612;GO:0005576;GO:0002376;GO:0002474	immune response;MHC class I protein complex;extracellular region;immune system process;antigen processing and presentation of peptide antigen via MHC class I	biological_process;cellular_component	TF661950	BETA 2 MICROGLOBULIN PRECURSOR	GO:0002376;GO:0032991;GO:0005575;GO:0005576;GO:0008150	immune system process;protein-containing complex;cellular_component;extracellular region;biological_process
ENSONIG00000012935	TAP binding protein like	tapbpl	2.15921	0.583428	3.69705	1.88637	0.757607	10.8309	0.000998221	0.139044	1	protein_coding	ZDB-GENE-121003-1	100706487	I3K576	GO:0016020;GO:0019885;GO:0016021	membrane;antigen processing and presentation of endogenous peptide antigen via MHC class I;integral component of membrane	cellular_component;biological_process	PTHR23411_SF3	TAPASIN RELATED PRECURSOR TAPASIN R TAP BINDING TAP BINDING RELATED TAPBP R TAPASIN	GO:0005575;GO:0002376	cellular_component;immune system process
ENSONIG00000000927	protein phosphatase, Mg2+/Mn2+ dependent, 1Ba	ppm1ba	11.6718	18.6864	-1.60494	-0.682517	3.85028	10.7614	0.00103638	0.139221	1	protein_coding	ZDB-GENE-991102-16			GO:0030145;GO:0004721;GO:0000287;GO:0004722;GO:0043169;GO:0006470;GO:0003824;GO:0016787;GO:0046872	manganese ion binding;phosphoprotein phosphatase activity;magnesium ion binding;protein serine/threonine phosphatase activity;cation binding;protein dephosphorylation;catalytic activity;hydrolase activity;metal ion binding	molecular_function;biological_process	PTHR13832_SF244	PHOSPHATASE 1B EC_3.1.3.16 PHOSPHATASE 2C BETA PP2C BETA	GO:0003674;GO:0006464;GO:0043167;GO:0016791	molecular_function;cellular protein modification process;ion binding;phosphatase activity	04660+3.1.3.16;04658+3.1.3.16
ENSONIG00000001552	attractin-like 1a	atrnl1a	22.6227	32.3371	-1.43052	-0.516536	4.7646	10.7421	0.00104723	0.139221	1	protein_coding	ZDB-GENE-081028-60			GO:0005515;GO:0016020;GO:0016021	protein binding;membrane;integral component of membrane	molecular_function;cellular_component	PTHR10574_SF224	ATTRACTIN 1 PRECURSOR	GO:0003674;GO:0005575	molecular_function;cellular_component
ENSONIG00000013945	insulin gene enhancer protein ISL-1	isl1	27.5114	20.2633	1.35381	0.437027	4.50864	10.7922	0.0010193	0.139221	1	protein_coding	ZDB-GENE-980526-112	100700683	I3K8T3	GO:0043565;GO:0006355;GO:0003677;GO:0005634;GO:0046872;GO:0003322;GO:0003323;GO:0003324;GO:0008016;GO:0021522;GO:0021527;GO:0031017;GO:0031018;GO:0048665;GO:0048666;GO:0048675;GO:0048936;GO:0055011;GO:0097154	sequence-specific DNA binding;regulation of transcription, DNA-templated;DNA binding;nucleus;metal ion binding;pancreatic A cell development;type B pancreatic cell development;pancreatic D cell development;regulation of heart contraction;spinal cord motor neuron differentiation;spinal cord association neuron differentiation;exocrine pancreas development;endocrine pancreas development;neuron fate …	molecular_function;biological_process;cellular_component	PTHR24204	INSULIN GENE ENHANCER ISL ISLET	GO:0003674;GO:0003677;GO:0005575;GO:0043226;GO:0005634;GO:0043167;GO:0048856;GO:0030154;GO:0040007	molecular_function;DNA binding;cellular_component;organelle;nucleus;ion binding;anatomical structure development;cell differentiation;growth
ENSONIG00000016438			16.9017	24.2363	-1.44156	-0.527629	4.34686	10.7287	0.00105485	0.139221	1	protein_coding				GO:0007605;GO:0007155;GO:0007156;GO:0005886;GO:0005509;GO:0016020;GO:0048839;GO:0032420;GO:0016021	sensory perception of sound;cell adhesion;homophilic cell adhesion via plasma membrane adhesion molecules;plasma membrane;calcium ion binding;membrane;inner ear development;stereocilium;integral component of membrane	biological_process;cellular_component;molecular_function	PTHR24028_SF11	PROTOCADHERIN 15 PRECURSOR	GO:0005575;GO:0003674;GO:0043167;GO:0005886;GO:0007155;GO:0050877;GO:0048856	cellular_component;molecular_function;ion binding;plasma membrane;cell adhesion;nervous system process;anatomical structure development
ENSONIG00000018980	plac8 onzin related protein 1	ponzr1 (1 of many)	3.3353	1.59641	2.07812	1.05528	1.30433	10.738	0.00104959	0.139221	2	protein_coding	ZDB-GENE-070727-1						PTHR15907_SF34	UNCHARACTERIZED
ENSONIG00000020069			56.0403	74.8136	-1.33474	-0.416557	5.97853	10.7538	0.00104064	0.139221	1	protein_coding				GO:0006468;GO:0004672;GO:0005524	protein phosphorylation;protein kinase activity;ATP binding	biological_process;molecular_function	PTHR24343_SF118	SERINE/THREONINE KINASE	GO:0003674;GO:0043167;GO:0016301;GO:0006464	molecular_function;ion binding;kinase activity;cellular protein modification process
ENSONIG00000024229			1.46633	0.295689	4.97324	2.31419	0.00720207	10.7154	0.00106246	0.139221	1	lincRNA
ENSONIG00000025423			32.7777	23.4519	1.39694	0.482275	4.79756	10.756	0.00103944	0.139221	1	lincRNA
ENSONIG00000015339	calcium and integrin-binding family member 2	cib2	2.66784	0.89044	3.00251	1.58617	1.10384	10.6553	0.00109757	0.141723	2	protein_coding	ZDB-GENE-040426-1663	100692410	I3KDV3;I3KDV4	GO:0005509;GO:0007638;GO:0043010;GO:0048884	calcium ion binding;mechanosensory behavior;camera-type eye development;neuromast development	molecular_function;biological_process	PTHR23056_SF22	CALCIUM AND INTEGRIN BINDING FAMILY MEMBER 2 KINASE INTERACTING 2 KIP 2	GO:0003674;GO:0043167;GO:0048856	molecular_function;ion binding;anatomical structure development
ENSONIG00000016967	trafficking protein particle complex subunit 6B		197.287	154.159	1.27988	0.356004	7.61893	10.6684	0.00108979	0.141723	1	protein_coding		100707247	I3KJV1	GO:0048193;GO:0043087	Golgi vesicle transport;regulation of GTPase activity	biological_process	PTHR12817	TRAFFICKING PARTICLE COMPLEX SUBUNIT TRAPP COMPLEX SUBUNIT	GO:0008150;GO:0006810;GO:0016192	biological_process;transport;vesicle-mediated transport
ENSONIG00000011175	Rho guanine nucleotide exchange factor (GEF) 28a	arhgef28a	4.088	7.26191	-1.76743	-0.821655	2.30459	10.6383	0.00110769	0.141993	1	protein_coding	ZDB-GENE-060531-28			GO:0005085;GO:0035556;GO:0035023;GO:0005089;GO:0046872;GO:0007030;GO:0007160;GO:0060415	guanyl-nucleotide exchange factor activity;intracellular signal transduction;regulation of Rho protein signal transduction;Rho guanyl-nucleotide exchange factor activity;metal ion binding;Golgi organization;cell-matrix adhesion;muscle tissue morphogenesis	molecular_function;biological_process	PTHR22825_SF4	RHO GUANINE NUCLEOTIDE EXCHANGE FACTOR 28.190 KDA GUANINE NUCLEOTIDE EXCHANGE FACTOR P190 RHOGEF P190RHOGEF RHO GUANINE NUCLEOTIDE EXCHANGE FACTOR	GO:0003674;GO:0007165;GO:0043167;GO:0007155	molecular_function;signal transduction;ion binding;cell adhesion
ENSONIG00000019669	dolichyl-diphosphooligosaccharide--protein glycosyltransferase subunit STT3B	STT3B (1 of many)	26.2059	34.4337	-1.31546	-0.395569	4.93902	10.582	0.00114193	0.145329	1	protein_coding		100692553	I3KUG5	GO:0006486;GO:0016020;GO:0004576;GO:0016021	protein glycosylation;membrane;oligosaccharyl transferase activity;integral component of membrane	biological_process;cellular_component;molecular_function	PTHR13872_SF1	DOLICHYL DIPHOSPHOOLIGOSACCHARIDE GLYCOSYLTRANSFERASE SUBUNIT STT3B OLIGOSACCHARYL TRANSFERASE SUBUNIT STT3B STT3 B EC_2.4.99.18	GO:0005575;GO:0006464;GO:0016757	cellular_component;cellular protein modification process;transferase activity, transferring glycosyl groups
ENSONIG00000002021	ADP ribosylation factor like GTPase 16	arl16	34.7141	26.2592	1.32254	0.403316	4.99033	10.5569	0.00115753	0.146262	1	protein_coding	ZDB-GENE-070410-114	100702080	I3J0Y9	GO:0005525;GO:0000166	GTP binding;nucleotide binding	molecular_function	PTHR11711_SF42	UNCHARACTERIZED	GO:0003674;GO:0043167	molecular_function;ion binding
ENSONIG00000003026	kinesin family member 13Ba	kif13ba	14.8057	21.8488	-1.48089	-0.566463	4.20583	10.5351	0.00117126	0.14638	2	protein_coding	ZDB-GENE-070521-1			GO:0007018;GO:0008017;GO:0003777;GO:0005524;GO:0005515;GO:0000166;GO:0003774	microtubule-based movement;microtubule binding;microtubule motor activity;ATP binding;protein binding;nucleotide binding;motor activity	biological_process;molecular_function	PTHR24115_SF338	KINESIN KIF13B KINESIN GAKIN	GO:0003674;GO:0043167;GO:0008092	molecular_function;ion binding;cytoskeletal protein binding
ENSONIG00000026811			5.2499	3.06942	1.70634	0.770905	2.02964	10.5292	0.00117501	0.14638	1	lincRNA
ENSONIG00000016953	eph receptor B2a	ephb2a	58.9277	82.5702	-1.40104	-0.486495	6.15239	10.4821	0.00120539	0.149114	1	protein_coding	ZDB-GENE-070713-2		I3KJT5	GO:0007169;GO:0005003;GO:0004713;GO:0005887;GO:0016021;GO:0006468;GO:0004672;GO:0005524;GO:0005515;GO:0016020;GO:0016740;GO:0000166;GO:0016301;GO:0016310;GO:0018108;GO:0004714;GO:0001568;GO:0048013;GO:0060026	transmembrane receptor protein tyrosine kinase signaling pathway;ephrin receptor activity;protein tyrosine kinase activity;integral component of plasma membrane;integral component of membrane;protein phosphorylation;protein kinase activity;ATP binding;protein binding;membrane;transferase activity;nucleotide binding;kinase activity;phosphorylation;peptidyl-tyrosine phosphorylation;transmembrane re…	biological_process;molecular_function;cellular_component	PTHR24416_SF123	EPHRIN TYPE B RECEPTOR 2 PRECURSOR EC_2.7.10.1 TYROSINE KINASE TYROSINE KINASE EPH 3 TYROSINE KINASE RECEPTOR 3 [CONTAINS EPHB2/CTF1 ; EPHB2/CTF2]	GO:0003674;GO:0043167;GO:0016301;GO:0006464;GO:0005575;GO:0007165;GO:0048856	molecular_function;ion binding;kinase activity;cellular protein modification process;cellular_component;signal transduction;anatomical structure development
ENSONIG00000009414	hydroperoxide isomerase ALOXE3		20.7335	11.221	1.84741	0.885501	4.07269	10.4562	0.0012224	0.150169	1	protein_coding		100691581	I3JSI7	GO:0016702;GO:0005506;GO:0046872;GO:0055114;GO:0005515;GO:0016491;GO:0051213	oxidoreductase activity, acting on single donors with incorporation of molecular oxygen, incorporation of two atoms of oxygen;iron ion binding;metal ion binding;oxidation-reduction process;protein binding;oxidoreductase activity;dioxygenase activity	molecular_function;biological_process	PTHR11771_SF40	HYDROPEROXIDE ISOMERASE ALOXE3 EC_5.4.4.7 EPIDERMIS TYPE LIPOXYGENASE 3 EPIDERMAL LOX 3 E LOX 3 ELOX 3 HYDROPEROXY ICOSATETRAENOATE DEHYDRATASE EC_4.2.1.- 152	GO:0003674;GO:0043167;GO:0016491	molecular_function;ion binding;oxidoreductase activity
ENSONIG00000012250	si:dkey-188i13.11	si:dkey-188i13.11	5.23307	1.69331	3.0838	1.62471	1.83802	10.4137	0.00125086	0.15156	1	protein_coding	ZDB-GENE-090313-209			GO:0016021;GO:0016020	integral component of membrane;membrane	cellular_component	TF626424	UNCHARACTERIZED	GO:0005575	cellular_component
ENSONIG00000025078			0.70731	2.17437	-3.00357	-1.58668	0.537352	10.4162	0.00124913	0.15156	1	lincRNA
ENSONIG00000011977			0.662083	2.86576	-4.35631	-2.12311	1.30446	10.3765	0.00127627	0.152129	1	protein_coding
ENSONIG00000011987	tripartite motif containing 25, like	trim25l	1.22313	0.364625	3.35993	1.74843	0.0946025	10.393	0.00126495	0.152129	1	protein_coding	ZDB-GENE-040914-87			GO:0008270;GO:0005515;GO:0046872	zinc ion binding;protein binding;metal ion binding	molecular_function	PTHR24103_SF263	E3 UBIQUITIN LIGASE RNF135 EC_2.3.2.27 RING FINGER 135 RING TYPE E3 UBIQUITIN TRANSFERASE RNF135	GO:0003674;GO:0043167	molecular_function;ion binding
ENSONIG00000026856			0.67908	2.57504	-3.8203	-1.93369	0.279749	10.3692	0.00128136	0.152129	1	lincRNA
ENSONIG00000010511	small G protein signaling modulator 2	sgsm2	38.4598	48.9132	-1.27329	-0.348565	5.39849	10.3365	0.00130426	0.152797	2	protein_coding	ZDB-GENE-131119-52			GO:0005096;GO:0043547	GTPase activator activity;positive regulation of GTPase activity	molecular_function;biological_process	PTHR22957_SF194	SMALL G SIGNALING MODULATOR 2 RUN AND TBC1 DOMAIN CONTAINING 1	GO:0003674;GO:0030234	molecular_function;enzyme regulator activity
ENSONIG00000017217	interferon regulatory factor 1		11.5023	6.70439	1.72177	0.783894	3.22469	10.3369	0.00130394	0.152797	1	protein_coding		100704899	I3KKS3	GO:0044212;GO:0050776;GO:0008285;GO:0003700;GO:0006355;GO:0006915;GO:0003677;GO:0005634	transcription regulatory region DNA binding;regulation of immune response;negative regulation of cell population proliferation;DNA-binding transcription factor activity;regulation of transcription, DNA-templated;apoptotic process;DNA binding;nucleus	molecular_function;biological_process;cellular_component	PTHR11949_SF3	INTERFERON REGULATORY FACTOR 1 IRF 1	GO:0008219;GO:0003674;GO:0003700;GO:0003677;GO:0005575;GO:0043226;GO:0005634	cell death;molecular_function;DNA-binding transcription factor activity;DNA binding;cellular_component;organelle;nucleus
ENSONIG00000002165	PR domain containing 2, with ZNF domain a	prdm2a	38.9239	51.193	-1.3179	-0.39824	5.49979	10.2465	0.00136941	0.15646	1	protein_coding	ZDB-GENE-081104-139			GO:0003676	nucleic acid binding	molecular_function	PTHR24385_SF54	PR DOMAIN CONTAINING 2 WITH ZNF DOMAIN A	GO:0003674	molecular_function
ENSONIG00000002392	ATPase phospholipid transporting 8A1	ATP8A1	189.646	237.015	-1.24984	-0.321745	7.75272	10.2391	0.00137498	0.15646	2	protein_coding				GO:0004012;GO:0015914;GO:0000287;GO:0016021;GO:0005524;GO:0016020;GO:0000166;GO:0045332	phospholipid-translocating ATPase activity;phospholipid transport;magnesium ion binding;integral component of membrane;ATP binding;membrane;nucleotide binding;phospholipid translocation	molecular_function;biological_process;cellular_component	PTHR24092_SF56	PHOSPHOLIPID TRANSPORTING ATPASE IA EC_7.6.2.1 ATPASE CLASS I TYPE 8A MEMBER 1 CHROMAFFIN GRANULE ATPASE II P4 ATPASE FLIPPASE COMPLEX ALPHA SUBUNIT AT	GO:0003674;GO:0043167;GO:0005575;GO:0006810;GO:0016887;GO:0061024	molecular_function;ion binding;cellular_component;transport;ATPase activity;membrane organization
ENSONIG00000007571	adhesion G protein-coupled receptor L3	ADGRL3	68.5558	89.1478	-1.30012	-0.378646	6.25644	10.2691	0.00135275	0.15646	2	protein_coding		100692188		GO:0030246;GO:0004888;GO:0007166;GO:0016021;GO:0007186;GO:0004930;GO:0016020;GO:0007165	carbohydrate binding;transmembrane signaling receptor activity;cell surface receptor signaling pathway;integral component of membrane;G protein-coupled receptor signaling pathway;G protein-coupled receptor activity;membrane;signal transduction	molecular_function;biological_process;cellular_component	PTHR12011_SF60	ADHESION G COUPLED RECEPTOR L3 PRECURSOR CALCIUM INDEPENDENT ALPHA LATROTOXIN RECEPTOR 3 CIRL 3 LATROPHILIN 3	GO:0005575;GO:0003674;GO:0007165	cellular_component;molecular_function;signal transduction
ENSONIG00000011731			6.94415	10.1704	-1.45337	-0.539406	3.08091	10.2327	0.00137975	0.15646	1	protein_coding							PTHR11818_SF2	BETA/GAMMA CRYSTALLIN DOMAIN CONTAINING 1 ABSENT IN MELANOMA 1
ENSONIG00000014818	WD repeat and SOCS box containing 1	wsb1	77.7138	96.5011	-1.24174	-0.31236	6.49214	10.2379	0.00137583	0.15646	1	protein_coding	ZDB-GENE-030131-1946	100701234	I3KC11	GO:0035556;GO:0005515;GO:0016567	intracellular signal transduction;protein binding;protein ubiquitination	biological_process;molecular_function	PTHR15622	WD REPEAT AND SOCS BOX CONTAINING WSB	GO:0003674;GO:0007165;GO:0006464	molecular_function;signal transduction;cellular protein modification process
ENSONIG00000013809	ceramide synthase 2	cers3a	6.32587	11.0058	-1.74313	-0.80168	3.06868	10.2086	0.00139791	0.157509	2	protein_coding	ZDB-GENE-130320-1	100710960	I3K8B9;I3K8C0	GO:0016021;GO:0003677;GO:0016020;GO:0005634	integral component of membrane;DNA binding;membrane;nucleus	cellular_component;molecular_function	PTHR12560	CERAMIDE SYNTHASE LAG1 LONGEVITY ASSURANCE HOMOLOG	GO:0003674;GO:0003677;GO:0005575;GO:0043226;GO:0005634	molecular_function;DNA binding;cellular_component;organelle;nucleus
ENSONIG00000001684	centrosomal protein 85, like	cep85l	39.8474	49.859	-1.25147	-0.323618	5.57796	10.1679	0.0014291	0.158005	3	protein_coding	ZDB-GENE-041014-309						PTHR31075	CENTROSOMAL OF 85 KDA CEP85 COILED COIL DOMAIN CONTAINING 21
ENSONIG00000001733	MAM domain-containing glycosylphosphatidylinositol anchor protein 2		28.3177	40.3522	-1.42795	-0.513947	5.01714	10.1764	0.00142247	0.158005	2	protein_coding		100711078	I3IZY0;I3IZX9	GO:0016020;GO:0005515	membrane;protein binding	cellular_component;molecular_function	PTHR23282_SF62	MAM DOMAIN CONTAINING GLYCOSYLPHOSPHATIDYLINOSITOL ANCHOR 2 PRECURSOR MAM DOMAIN CONTAINING 1	GO:0003674;GO:0005575	molecular_function;cellular_component
ENSONIG00000024354			0.539611	1.6638	-3.00005	-1.58499	0.120864	10.1872	0.00141422	0.158005	2	lincRNA
ENSONIG00000007604	transportin 3	tnpo3	6.78076	17.0972	-2.52319	-1.33525	3.48416	10.0786	0.00150002	0.164816	1	protein_coding	ZDB-GENE-040426-708	100709983	I3JL41	GO:0006886;GO:0008536;GO:0005634;GO:0006397;GO:0008380;GO:0030217	intracellular protein transport;Ran GTPase binding;nucleus;mRNA processing;RNA splicing;T cell differentiation	biological_process;molecular_function;cellular_component	PTHR12363	IMPORTIN	GO:0006810;GO:0005575;GO:0043226;GO:0005634;GO:0034641;GO:0006397;GO:0002376;GO:0030154	transport;cellular_component;organelle;nucleus;cellular nitrogen compound metabolic process;mRNA processing;immune system process;cell differentiation
ENSONIG00000000248	small nuclear ribonucleoprotein polypeptides B and B1	snrpb	16.5664	28.323	-1.71169	-0.775418	4.30434	10.0352	0.00153577	0.167702	1	protein_coding	ZDB-GENE-040426-1819	100700782	I3IUM7	GO:0005634;GO:0003723	nucleus;RNA binding	cellular_component;molecular_function	PTHR10701_SF2	SMALL NUCLEAR RIBONUCLEOPROTEIN ASSOCIATED B' SNRNP B' SNRPB' SM B' SM B' SMB'	GO:0005575;GO:0043226;GO:0005634;GO:0003674;GO:0003723	cellular_component;organelle;nucleus;molecular_function;RNA binding
ENSONIG00000002577	isocitrate dehydrogenase		7.5898	14.0372	-1.85572	-0.891982	3.43372	9.98466	0.00157849	0.170146	1	protein_coding		100702411	I3J2Y9	GO:0006102;GO:0004450;GO:0000287;GO:0016616;GO:0051287;GO:0055114;GO:0016491;GO:0046872;GO:0006099	isocitrate metabolic process;isocitrate dehydrogenase (NADP+) activity;magnesium ion binding;oxidoreductase activity, acting on the CH-OH group of donors, NAD or NADP as acceptor;NAD binding;oxidation-reduction process;oxidoreductase activity;metal ion binding;tricarboxylic acid cycle	biological_process;molecular_function	PTHR11822	ISOCITRATE DEHYDROGENASE [NADP] IDH EC_1.1.1.42 IDP NADP + SPECIFIC ICDH OXALOSUCCINATE DECARBOXYLASE	GO:0003674;GO:0043167;GO:0044281;GO:0016491	molecular_function;ion binding;small molecule metabolic process;oxidoreductase activity	00020+1.1.1.42;00480+1.1.1.42;00720+1.1.1.42
ENSONIG00000005225	zgc:152774	zgc:152774	133.251	168.067	-1.26046	-0.333947	7.25504	9.98615	0.00157722	0.170146	2	protein_coding	ZDB-GENE-060929-544		I3JCH2;I3JCH3				PTHR23336_SF13	UNKNOWN
ENSONIG00000017275	jade family PHD finger 2	jade2	48.8517	66.1482	-1.35488	-0.438163	5.81128	9.97476	0.00158701	0.170146	2	protein_coding	ZDB-GENE-120215-66			GO:0046872	metal ion binding	molecular_function	PTHR13793_SF84	E3 UBIQUITIN LIGASE JADE 2 EC_2.3.2.27 JADE FAMILY PHD FINGER 2 PHD FINGER 15	GO:0003674;GO:0043167	molecular_function;ion binding
ENSONIG00000000692	spectrin repeat containing, nuclear envelope 1b	syne1b	125.683	175.428	-1.39664	-0.481956	7.18175	9.94581	0.00161216	0.171802	1	protein_coding	ZDB-GENE-071218-4			GO:0034993;GO:0005635;GO:0090286;GO:0051015;GO:0016021;GO:0005515;GO:0016020;GO:0003779	meiotic nuclear membrane microtubule tethering complex;nuclear envelope;cytoskeletal anchoring at nuclear membrane;actin filament binding;integral component of membrane;protein binding;membrane;actin binding	cellular_component;biological_process;molecular_function	PTHR11915_SF267	NESPRIN 1 ENAPTIN KASH DOMAIN CONTAINING 1 KASH1 MYOCYTE NUCLEAR ENVELOPE 1 MYNE 1 NUCLEAR ENVELOPE SPECTRIN REPEAT 1 SYNAPTIC NUCLEAR ENVELOPE 1 SYNE 1	GO:0003674;GO:0005575;GO:0008092;GO:0007010;GO:0005635;GO:0032991	molecular_function;cellular_component;cytoskeletal protein binding;cytoskeleton organization;nuclear envelope;protein-containing complex
ENSONIG00000001505	endothelial PAS domain protein 1	epas1b	358.004	448.57	-1.25323	-0.325646	8.62123	9.87602	0.00167446	0.173224	1	protein_coding	ZDB-GENE-060607-11	100691768	I3IZ44	GO:0005667;GO:0005737;GO:0003700;GO:0005634;GO:0006355;GO:0046983;GO:0005515;GO:0000976;GO:0001666;GO:0014823;GO:0030182;GO:0031017;GO:0043523;GO:0048565;GO:0051402;GO:0097150;GO:1990402	transcription factor complex;cytoplasm;DNA-binding transcription factor activity;nucleus;regulation of transcription, DNA-templated;protein dimerization activity;protein binding;transcription regulatory region sequence-specific DNA binding;response to hypoxia;response to activity;neuron differentiation;exocrine pancreas development;regulation of neuron apoptotic process;digestive tract developmen…	cellular_component;molecular_function;biological_process	PTHR23043_SF8	ENDOTHELIAL PAS DOMAIN CONTAINING 1 EPAS 1 HIF 1 ALPHA FACTOR HLF HYPOXIA INDUCIBLE FACTOR 2 ALPHA HIF 2 ALPHA HIF2 ALPHA	GO:0003674;GO:0005575;GO:0043226;GO:0005634;GO:0003700;GO:0005737;GO:0032991;GO:0003677;GO:0006950;GO:0030154;GO:0048856;GO:0008219	molecular_function;cellular_component;organelle;nucleus;DNA-binding transcription factor activity;cytoplasm;protein-containing complex;DNA binding;response to stress;cell differentiation;anatomical structure development;cell death
ENSONIG00000001826			32.0477	40.8776	-1.27339	-0.34867	5.17263	9.91404	0.00164023	0.173224	1	protein_coding				GO:0005732;GO:0000493;GO:0042254;GO:0001522;GO:0003723	small nucleolar ribonucleoprotein complex;box H/ACA snoRNP assembly;ribosome biogenesis;pseudouridine synthesis;RNA binding	cellular_component;biological_process;molecular_function	PTHR31991_SF1	H/ACA RIBONUCLEOPROTEIN COMPLEX NON CORE SUBUNIT NAF1	GO:0003674;GO:0003723;GO:0034641;GO:0042254;GO:0022607;GO:0022618;GO:0065003;GO:0032991;GO:0005575	molecular_function;RNA binding;cellular nitrogen compound metabolic process;ribosome biogenesis;cellular component assembly;ribonucleoprotein complex assembly;protein-containing complex assembly;protein-containing complex;cellular_component
ENSONIG00000002971	chromobox homolog 3b	cbx3b	10.0633	6.86983	1.46348	0.549398	3.13408	9.88316	0.00166798	0.173224	1	protein_coding	ZDB-GENE-070628-2			GO:0005634	nucleus	cellular_component	PTHR22812_SF84	CHROMOBOX HOMOLOG	GO:0005575;GO:0043226;GO:0005634	cellular_component;organelle;nucleus
ENSONIG00000011146	deoxycytidine kinase	dck	1.47846	0.492375	2.93307	1.55241	0.146151	9.87946	0.00167134	0.173224	1	protein_coding	ZDB-GENE-041024-3	100706399	I3JYU0	GO:0006139;GO:0005524;GO:0019206;GO:0000166;GO:0009165	nucleobase-containing compound metabolic process;ATP binding;nucleoside kinase activity;nucleotide binding;nucleotide biosynthetic process	biological_process;molecular_function	PTHR10513_SF19	DEOXYCYTIDINE KINASE DCK EC_2.7.1.74	GO:0003674;GO:0043167;GO:0034641;GO:0016301;GO:0009058;GO:0044281	molecular_function;ion binding;cellular nitrogen compound metabolic process;kinase activity;biosynthetic process;small molecule metabolic process
ENSONIG00000026714			0.0653307	3.29686	-46.1206	-5.52734	0.606775	9.88315	0.00166799	0.173224	1	lincRNA
ENSONIG00000005476	neuronal PAS domain protein 4	npas4a	108.39	136.342	-1.25769	-0.330779	6.87714	9.84558	0.0017024	0.174078	2	protein_coding	ZDB-GENE-060616-396	100694411	I3JDE2;I3JDE1	GO:0046983;GO:0005515;GO:0005634;GO:0001568;GO:0030900	protein dimerization activity;protein binding;nucleus;blood vessel development;forebrain development	molecular_function;cellular_component;biological_process	PTHR23043_SF13	NEURONAL PAS DOMAIN CONTAINING 4 NEURONAL PAS4 HLH PAS TRANSCRIPTION FACTOR NXF	GO:0003674;GO:0005575;GO:0043226;GO:0005634;GO:0048856	molecular_function;cellular_component;organelle;nucleus;anatomical structure development
ENSONIG00000012160	centrosomal protein 170B	cep170b	3.23081	5.46815	-1.69695	-0.762947	2.16044	9.85537	0.00169337	0.174078	1	protein_coding	ZDB-GENE-131127-515			GO:0005515	protein binding	molecular_function	PTHR15715_SF18	UNKNOWN	GO:0003674	molecular_function
ENSONIG00000020086			5.69406	2.59729	2.17979	1.12419	2.14963	9.82067	0.00172561	0.175437	1	protein_coding				GO:0008305;GO:0007155;GO:0016020;GO:0016021;GO:0007229	integrin complex;cell adhesion;membrane;integral component of membrane;integrin-mediated signaling pathway	cellular_component;biological_process	PTHR23220_SF17	INTEGRIN ALPHA X PRECURSOR CD11 ANTIGEN FAMILY MEMBER C LEUKOCYTE ADHESION GLYCOPROTEIN P150 95 ALPHA CHAIN LEUKOCYTE ADHESION RECEPTOR P150 95 CD11C ANTIGEN	GO:0007155;GO:0032991;GO:0005575;GO:0007165	cell adhesion;protein-containing complex;cellular_component;signal transduction
ENSONIG00000012134	limb development membrane protein 1 like	lmbr1l	0.566495	1.48083	-2.53284	-1.34076	0.0781701	9.79316	0.00175162	0.177064	1	protein_coding	ZDB-GENE-030131-9906	100707288	I3K2D5	GO:0016020;GO:0016021	membrane;integral component of membrane	cellular_component	PTHR12625	LIMB REGION 1 HOMOLOG	GO:0005575	cellular_component
ENSONIG00000017763			0.437548	1.2237	-2.64744	-1.4046	-0.0297177	9.76683	0.00177688	0.178597	2	protein_coding				GO:0016020;GO:0016021	membrane;integral component of membrane	cellular_component	TF641842	UNCHARACTERIZED	GO:0005575	cellular_component
ENSONIG00000005714	teneurin transmembrane protein 4	tenm4	78.0852	102.338	-1.3111	-0.390774	6.48765	9.7532	0.00179011	0.17891	1	protein_coding	ZDB-GENE-990714-20			GO:0016021;GO:0007165;GO:0048666;GO:0016020	integral component of membrane;signal transduction;neuron development;membrane	cellular_component;biological_process	PTHR11219	TENEURIN TEN ODD OZ/TEN M HOMOLOG TENASCIN TEN TENEURIN TRANSMEMBRANE	GO:0007165;GO:0005575;GO:0048856	signal transduction;cellular_component;anatomical structure development
ENSONIG00000001106	neurexin 3b	nrxn3b	87.6427	116.374	-1.32773	-0.408963	6.65352	9.71897	0.00182376	0.181249	1	protein_coding	ZDB-GENE-070206-10			GO:0016021;GO:0016020	integral component of membrane;membrane	cellular_component	PTHR10127_SF586	NEUREXIN 3B PRECURSOR NEUREXIN IIIB NEUREXIN 3B	GO:0005575	cellular_component
ENSONIG00000001719			15.4852	21.1414	-1.36475	-0.448639	4.13646	9.67137	0.00187162	0.184966	1	protein_coding				GO:0004127;GO:0004017;GO:0019205;GO:0006139;GO:0005524;GO:0016310;GO:0046940	cytidylate kinase activity;adenylate kinase activity;nucleobase-containing compound kinase activity;nucleobase-containing compound metabolic process;ATP binding;phosphorylation;nucleoside monophosphate phosphorylation	molecular_function;biological_process	PTHR23359_SF71	ADENYLATE KINASE 7 AK 7 EC_2.7.4.3 EC_2.7.4.- 6 ATP AMP TRANSPHOSPHORYLASE 7	GO:0003674;GO:0043167;GO:0034641;GO:0016301;GO:0009058;GO:0044281	molecular_function;ion binding;cellular nitrogen compound metabolic process;kinase activity;biosynthetic process;small molecule metabolic process	00983+2.7.4.6;00240+2.7.4.6;00730+2.7.4.3;00230+2.7.4.3;00230+2.7.4.6+2.7.4.3
ENSONIG00000002351	C-C motif chemokine 17		87.5421	68.7408	1.27322	0.348486	6.37316	9.62895	0.00191534	0.188235	2	protein_coding		100708142	I3J251;I3J250	GO:0008009;GO:0006955;GO:0005576;GO:0060326	chemokine activity;immune response;extracellular region;cell chemotaxis	molecular_function;biological_process;cellular_component			GO:0005575;GO:0005576;GO:0002376;GO:0048870;GO:0040011	cellular_component;extracellular region;immune system process;cell motility;locomotion
ENSONIG00000011445	TAO kinase 2b	taok2b	180.627	225.844	-1.25044	-0.322431	7.63822	9.5688	0.00197912	0.193429	2	protein_coding	ZDB-GENE-110603-3			GO:0006468;GO:0004672;GO:0005524;GO:0030901	protein phosphorylation;protein kinase activity;ATP binding;midbrain development	biological_process;molecular_function	PTHR24361_SF188	SERINE/THREONINE KINASE TAO2 EC_2.7.11.1 THOUSAND AND ONE AMINO ACID 2	GO:0003674;GO:0043167;GO:0016301;GO:0006464;GO:0048856	molecular_function;ion binding;kinase activity;cellular protein modification process;anatomical structure development
ENSONIG00000002300	contactin-3	cntn3a.2	25.4877	37.8715	-1.48819	-0.573556	4.82303	9.51187	0.00204147	0.195482	1	protein_coding	ZDB-GENE-090312-57	100703160	I3J1Y2	GO:0005515	protein binding	molecular_function	PTHR10489_SF505	CONTACTIN	GO:0003674	molecular_function
ENSONIG00000003021	GS homeobox 2	gsx2	8.45309	4.9548	1.70077	0.766186	2.69071	9.52404	0.00202798	0.195482	1	protein_coding	ZDB-GENE-041001-114	100691166	I3J4J4	GO:0043565;GO:0006355;GO:0003677;GO:0005634	sequence-specific DNA binding;regulation of transcription, DNA-templated;DNA binding;nucleus	molecular_function;biological_process;cellular_component	PTHR24326_SF170	UNKNOWN	GO:0003674;GO:0003677;GO:0005575;GO:0043226;GO:0005634	molecular_function;DNA binding;cellular_component;organelle;nucleus
ENSONIG00000009366			0.554339	1.6366	-2.87293	-1.52252	0.201355	9.5093	0.00204433	0.195482	1	protein_coding							PTHR10489_SF537	UNCHARACTERIZED
ENSONIG00000024131			5.51176	10.146	-1.83647	-0.876939	2.94288	9.53228	0.00201889	0.195482	1	lincRNA
ENSONIG00000001663			104.939	131.757	-1.25585	-0.328663	6.88763	9.43298	0.00213118	0.198598	1	protein_coding				GO:0005524	ATP binding	molecular_function	PTHR10799_SF51	HELICASE ARIP4 EC_3.6.4.12 ANDROGEN RECEPTOR INTERACTING 4 RAD54 2	GO:0003674;GO:0043167	molecular_function;ion binding
ENSONIG00000008724	clustered mitochondria (cluA/CLU1) homolog b	cluhb	12.1171	18.6402	-1.53631	-0.619465	3.96415	9.42177	0.00214424	0.198598	1	protein_coding	ZDB-GENE-091113-48			GO:0005515	protein binding	molecular_function	PTHR12601	CLUSTERED MITOCHONDRIA HOMOLOG	GO:0003674	molecular_function
ENSONIG00000009945	zinc transporter ZIP9		18.0266	12.3764	1.45491	0.540928	3.9492	9.44417	0.00211822	0.198598	2	protein_coding		100708959	I3JUF9;I3JUF8	GO:0046873;GO:0030001;GO:0055085;GO:0016020;GO:0016021	metal ion transmembrane transporter activity;metal ion transport;transmembrane transport;membrane;integral component of membrane	molecular_function;biological_process;cellular_component	PTHR16133	ZINC TRANSPORTER ZIP9 SOLUTE CARRIER FAMILY 39 MEMBER 9 ZRT AND IRT 9 ZIP 9	GO:0005575;GO:0006810;GO:0055085;GO:0022857;GO:0003674	cellular_component;transport;transmembrane transport;transmembrane transporter activity;molecular_function
ENSONIG00000018274			189.75	258.129	-1.36083	-0.44449	7.76221	9.42175	0.00214427	0.198598	1	protein_coding				GO:0007165;GO:0005515	signal transduction;protein binding	biological_process;molecular_function	PTHR24123_SF15	ANKYRIN 3 ANK 3 ANKYRIN G	GO:0003674;GO:0007165	molecular_function;signal transduction
ENSONIG00000021221			32.3071	44.2255	-1.37186	-0.456136	5.22182	9.45948	0.00210061	0.198598	1	protein_coding				GO:0007155;GO:0007156;GO:0005886;GO:0005509;GO:0016020;GO:0016021	cell adhesion;homophilic cell adhesion via plasma membrane adhesion molecules;plasma membrane;calcium ion binding;membrane;integral component of membrane	biological_process;cellular_component;molecular_function	PTHR24028_SF65	UNKNOWN	GO:0005575;GO:0003674;GO:0043167;GO:0005886;GO:0007155	cellular_component;molecular_function;ion binding;plasma membrane;cell adhesion
ENSONIG00000026732			0.468978	1.8232	-3.92648	-1.97324	-0.0937119	9.45647	0.00210405	0.198598	1	lincRNA
ENSONIG00000007451	low-density lipoprotein receptor-related protein 6	lrp6	46.7917	61.0456	-1.30764	-0.386962	5.7166	9.40212	0.00216734	0.198697	1	protein_coding	ZDB-GENE-090821-1	100705426	I3JKJ6	GO:0042813;GO:0005515;GO:0060070;GO:0017147;GO:0016020;GO:0016021;GO:0005886;GO:0007275;GO:0016055;GO:0071936	Wnt-activated receptor activity;protein binding;canonical Wnt signaling pathway;Wnt-protein binding;membrane;integral component of membrane;plasma membrane;multicellular organism development;Wnt signaling pathway;coreceptor activity involved in Wnt signaling pathway	molecular_function;biological_process;cellular_component	PTHR10529_SF109	LOW DENSITY LIPOPROTEIN RECEPTOR RELATED 6 PRECURSOR LRP 6	GO:0003674;GO:0007165;GO:0005575;GO:0005886;GO:0048856	molecular_function;signal transduction;cellular_component;plasma membrane;anatomical structure development
ENSONIG00000010474	interferon, gamma-inducible protein 30	ifi30	27.9091	20.8839	1.33629	0.418231	4.63745	9.39716	0.00217322	0.198697	1	protein_coding	ZDB-GENE-030131-8447			GO:0055114;GO:0047134	oxidation-reduction process;protein-disulfide reductase activity	biological_process;molecular_function	PTHR13234_SF18	GAMMA INTERFERON INDUCIBLE LYSOSOMAL THIOL REDUCTASE PRECURSOR EC_1.8.-.-
ENSONIG00000014105	fibrinogen beta chain	fgb	0.135465	1.21526	-9.29591	-3.2166	-0.884754	9.35937	0.00221849	0.198697	1	protein_coding	ZDB-GENE-030131-9261	100689963	I3K9D6	GO:0005102;GO:0007596;GO:0030168;GO:0051258;GO:0005577;GO:0072378	signaling receptor binding;blood coagulation;platelet activation;protein polymerization;fibrinogen complex;blood coagulation, fibrin clot formation	molecular_function;biological_process;cellular_component	PTHR19143_SF23	FIBRINOGEN BETA CHAIN FIBRINOPEPTIDE B; FIBRINOGEN BETA CHAIN]	GO:0003674;GO:0022607;GO:0065003;GO:0032991;GO:0005575;GO:0005615	molecular_function;cellular component assembly;protein-containing complex assembly;protein-containing complex;cellular_component;extracellular space
ENSONIG00000015837	K(lysine) acetyltransferase 6A	kat6a	49.7724	67.2389	-1.35289	-0.436046	5.75316	9.37095	0.00220452	0.198697	1	protein_coding	ZDB-GENE-021022-3			GO:0070776;GO:0003713;GO:0016573;GO:0004402;GO:0006334;GO:0000786;GO:0005634;GO:0006355;GO:0003677;GO:0048513;GO:0043966;GO:0046872;GO:1903508;GO:0001502;GO:0009880;GO:0009952;GO:0010172;GO:0014036;GO:0048703;GO:0048706;GO:0051216;GO:0000790	MOZ/MORF histone acetyltransferase complex;transcription coactivator activity;histone acetylation;histone acetyltransferase activity;nucleosome assembly;nucleosome;nucleus;regulation of transcription, DNA-templated;DNA binding;animal organ development;histone H3 acetylation;metal ion binding;positive regulation of nucleic acid-templated transcription;cartilage condensation;embryonic pattern speci…	cellular_component;molecular_function;biological_process	PTHR10615_SF26	HISTONE ACETYLTRANSFERASE KAT6A EC_2.3.1.48 MOZ YBF2/SAS3 SAS2 AND TIP60 3 MYST 3 MONOCYTIC LEUKEMIA ZINC FINGER HOMOLOG MONOCYTIC LEUKEMIA ZINC FINGER	GO:0003674;GO:0003677;GO:0005575;GO:0043226;GO:0005634;GO:0032991;GO:0022607;GO:0065003;GO:0016746;GO:0006464;GO:0048856;GO:0043167;GO:0009790	molecular_function;DNA binding;cellular_component;organelle;nucleus;protein-containing complex;cellular component assembly;protein-containing complex assembly;transferase activity, transferring acyl groups;cellular protein modification process;anatomical structure development;ion binding;embryo development
ENSONIG00000017455	USO1 vesicle transport factor	uso1	61.2927	47.5181	1.29077	0.36823	5.76571	9.35484	0.00222397	0.198697	2	protein_coding	ZDB-GENE-040426-688			GO:0005737;GO:0006886;GO:0016020;GO:0005515;GO:0008565;GO:0000139;GO:0048280	cytoplasm;intracellular protein transport;membrane;protein binding;protein transporter activity;Golgi membrane;vesicle fusion with Golgi apparatus	cellular_component;biological_process;molecular_function	PTHR10013	GENERAL VESICULAR TRANSPORT FACTOR P115 USO1 HOMOLOG TRANSCYTOSIS ASSOCIATED TAP VESICLE DOCKING	GO:0003674;GO:0005575;GO:0006810;GO:0005737;GO:0008565;GO:0061024	molecular_function;cellular_component;transport;cytoplasm;protein transporter activity;membrane organization
ENSONIG00000020929	protein HEXIM	hexim1	15.1776	10.5729	1.43667	0.522726	3.77492	9.36101	0.00221651	0.198697	1	protein_coding	ZDB-GENE-030131-4637	100695640	I3KYN5	GO:0000122;GO:0005737;GO:0005634;GO:0004861;GO:0017069;GO:0045736	negative regulation of transcription by RNA polymerase II;cytoplasm;nucleus;cyclin-dependent protein serine/threonine kinase inhibitor activity;snRNA binding;negative regulation of cyclin-dependent protein serine/threonine kinase activity	biological_process;cellular_component;molecular_function	PTHR13469	HEXIM	GO:0005575;GO:0043226;GO:0005634;GO:0005737;GO:0003674;GO:0008150;GO:0030234;GO:0003723	cellular_component;organelle;nucleus;cytoplasm;molecular_function;biological_process;enzyme regulator activity;RNA binding
ENSONIG00000023529			1.30523	0.405285	3.19047	1.67377	0.135488	9.37532	0.00219926	0.198697	1	lincRNA
ENSONIG00000020276	inositol 1,4,5-trisphosphate receptor, type 1b	itpr1b	43.5552	60.7165	-1.39305	-0.478249	5.71434	9.34525	0.00223564	0.198736	1	protein_coding	ZDB-GENE-070604-2			GO:0005783;GO:0006816;GO:0005262;GO:0070588;GO:0005216;GO:0006811;GO:0055085;GO:0016020;GO:0070679;GO:0005220;GO:0016021;GO:0048016	endoplasmic reticulum;calcium ion transport;calcium channel activity;calcium ion transmembrane transport;ion channel activity;ion transport;transmembrane transport;membrane;inositol 1,4,5 trisphosphate binding;inositol 1,4,5-trisphosphate-sensitive calcium-release channel activity;integral component of membrane;inositol phosphate-mediated signaling	cellular_component;biological_process;molecular_function	PTHR13715_SF52	INOSITOL 1 4 5 TRISPHOSPHATE RECEPTOR TYPE 1 IP3 RECEPTOR 1 IP3R 1 INS TYPE 1 INOSITOL 1 4 5 TRISPHOSPHATE RECEPTOR TYPE 1 INSP3 RECEPTOR	GO:0005575;GO:0006810;GO:0055085;GO:0022857;GO:0003674;GO:0043226;GO:0005783;GO:0043167;GO:0007165	cellular_component;transport;transmembrane transport;transmembrane transporter activity;molecular_function;organelle;endoplasmic reticulum;ion binding;signal transduction
ENSONIG00000003614			6.49796	2.87135	2.2732	1.18473	2.31149	9.29727	0.00229496	0.199009	1	protein_coding							PTHR23080_SF63	UNCHARACTERIZED
ENSONIG00000005098	dynein cytoplasmic 2 heavy chain 1	DYNC2H1	19.8071	28.3696	-1.43559	-0.521647	4.55056	9.32001	0.00226665	0.199009	1	protein_coding		100700807	I3JC18	GO:0030286;GO:0007018;GO:0003777;GO:0005524	dynein complex;microtubule-based movement;microtubule motor activity;ATP binding	cellular_component;biological_process;molecular_function	PTHR10676_SF34	CYTOPLASMIC DYNEIN 2 HEAVY CHAIN 1 CYTOPLASMIC DYNEIN 2 HEAVY CHAIN DYNEIN CYTOPLASMIC HEAVY CHAIN 2 DYNEIN HEAVY CHAIN ISOTYPE 1B	GO:0003674;GO:0043167;GO:0032991;GO:0005575	molecular_function;ion binding;protein-containing complex;cellular_component
ENSONIG00000018168	antigen peptide transporter 2	tap2t	12.0408	8.40999	1.43153	0.517555	3.39411	9.3269	0.00225814	0.199009	1	protein_coding	ZDB-GENE-130531-48	100698679	I3KP44	GO:0042626;GO:0016887;GO:0055085;GO:0016021;GO:0005524;GO:0016020;GO:0000166	ATPase activity, coupled to transmembrane movement of substances;ATPase activity;transmembrane transport;integral component of membrane;ATP binding;membrane;nucleotide binding	molecular_function;biological_process;cellular_component	PTHR24221_SF147	UNCHARACTERIZED	GO:0003674;GO:0043167;GO:0005575;GO:0006810;GO:0055085;GO:0016887;GO:0022857	molecular_function;ion binding;cellular_component;transport;transmembrane transport;ATPase activity;transmembrane transporter activity
ENSONIG00000019689	adhesion G protein-coupled receptor B1b	adgrb1b	227.745	287.529	-1.26253	-0.336314	7.95452	9.30235	0.0022886	0.199009	1	protein_coding	ZDB-GENE-081031-45			GO:0016525;GO:0004888;GO:0007166;GO:0016021;GO:0007186;GO:0004930;GO:0016020;GO:0007165;GO:0043277;GO:0043652;GO:0090387	negative regulation of angiogenesis;transmembrane signaling receptor activity;cell surface receptor signaling pathway;integral component of membrane;G protein-coupled receptor signaling pathway;G protein-coupled receptor activity;membrane;signal transduction;apoptotic cell clearance;engulfment of apoptotic cell;phagolysosome assembly involved in apoptotic cell clearance	biological_process;molecular_function;cellular_component	PTHR12011_SF39	ADHESION G COUPLED RECEPTOR B1 PRECURSOR BRAIN SPECIFIC ANGIOGENESIS INHIBITOR 1 [CONTAINS VASCULOSTATIN 120 VSTAT120 ; VASCULOSTATIN 40 VSTAT 40 ]	GO:0005575;GO:0003674;GO:0007165;GO:0006810;GO:0016192;GO:0061024;GO:0022607	cellular_component;molecular_function;signal transduction;transport;vesicle-mediated transport;membrane organization;cellular component assembly
ENSONIG00000023586			5.07024	1.96047	2.58694	1.37124	1.75524	9.30992	0.00227916	0.199009	2	lincRNA
ENSONIG00000001602			0.916706	0.207243	4.32269	2.11193	-0.219095	9.28172	0.00231451	0.199726	1	protein_coding				GO:0098609;GO:0016020	cell-cell adhesion;membrane	biological_process;cellular_component	PTHR13771_SF9	INTERCELLULAR ADHESION MOLECULE 3 PRECURSOR ICAM 3 CD50 ANTIGEN	GO:0005575;GO:0007155	cellular_component;cell adhesion
ENSONIG00000001532	polycomb group ring finger 3	PCGF3	42.892	60.1758	-1.40391	-0.489455	5.66886	9.25418	0.00234958	0.199827	1	protein_coding		100698744	I3IZ77				PTHR10825_SF17	POLYCOMB GROUP RING FINGER 3
ENSONIG00000007187	ryanodine receptor 2	RYR2	68.6325	105.73	-1.5416	-0.624429	6.49649	9.2569	0.0023461	0.199827	1	protein_coding				GO:0006816;GO:0006874;GO:0005219;GO:0005262;GO:0070588;GO:0016021;GO:0005509;GO:0016020;GO:0005515;GO:0005623;GO:0051209	calcium ion transport;cellular calcium ion homeostasis;ryanodine-sensitive calcium-release channel activity;calcium channel activity;calcium ion transmembrane transport;integral component of membrane;calcium ion binding;membrane;protein binding;cell;release of sequestered calcium ion into cytosol	biological_process;molecular_function;cellular_component	PTHR13715_SF75	RYANODINE RECEPTOR 2 RYR 2 RYR2 CARDIAC MUSCLE RYANODINE RECEPTOR CARDIAC MUSCLE RYANODINE RECEPTOR CALCIUM RELEASE CHANNEL TYPE 2 RYANODINE RECEPTOR	GO:0003674;GO:0005575;GO:0043167;GO:0006810;GO:0055085;GO:0022857;GO:0042592;GO:0005623	molecular_function;cellular_component;ion binding;transport;transmembrane transport;transmembrane transporter activity;homeostatic process;cell
ENSONIG00000025854			9.49971	1.81223	5.22848	2.38639	2.30311	9.26422	0.00233674	0.199827	2	lincRNA
ENSONIG00000016664	pappalysin 2	PAPPA2	8.84652	5.63355	1.56616	0.647236	2.92382	9.24056	0.00236713	0.200356	2	protein_coding		100690865	I3KIP7;I3KIP6	GO:0008237;GO:0008270;GO:0006508;GO:0008233;GO:0001525;GO:0008593;GO:0030903;GO:0051216	metallopeptidase activity;zinc ion binding;proteolysis;peptidase activity;angiogenesis;regulation of Notch signaling pathway;notochord development;cartilage development	molecular_function;biological_process	PTHR19325_SF349	PAPPALYSIN 2 PRECURSOR EC_3.4.24.- PREGNANCY ASSOCIATED PLASMA A2 PAPP A2 PREGNANCY ASSOCIATED PLASMA E1 PAPP E	GO:0003674;GO:0043167;GO:0008233;GO:0048646;GO:0048856	molecular_function;ion binding;peptidase activity;anatomical structure formation involved in morphogenesis;anatomical structure development
ENSONIG00000021374			6.19696	3.24914	1.89997	0.92598	2.24814	9.23069	0.00237992	0.20048	1	protein_coding				GO:0015074;GO:0008270;GO:0003676;GO:0000943	DNA integration;zinc ion binding;nucleic acid binding;retrotransposon nucleocapsid	biological_process;molecular_function;cellular_component	PTHR11439_SF127	TRANSPOSON TY4 GAG POL POLYPROTEIN TY4A TY4B TRANSPOSON TY4 TYA TYB POLYPROTEIN [INCLUDES CAPSID CA ; TY4 PROTEASE PR EC_3.4.23.- ; INTEGRASE IN ; REVERSE TRANSCRIPTASE/RIBONUCLEASE H RT RT RH EC_2.7.7.49 EC_2.7.-.- 7 7 EC 3.1.26.4 ]	GO:0003674;GO:0043167;GO:0006259;GO:0034641;GO:0005575	molecular_function;ion binding;DNA metabolic process;cellular nitrogen compound metabolic process;cellular_component
ENSONIG00000015525	EPS8 like 2	EPS8L2	2.34976	5.65033	-2.41254	-1.27055	2.01926	9.21776	0.00239678	0.200943	2	protein_coding			I3KEI9;I3KEJ0	GO:0005515	protein binding	molecular_function	PTHR12287_SF20	EPIDERMAL GROWTH FACTOR RECEPTOR KINASE SUBSTRATE 8 2 EPS8 2 EPIDERMAL GROWTH FACTOR RECEPTOR PATHWAY SUBSTRATE 8 RELATED 2 EPS8 RELATED 2	GO:0003674	molecular_function
ENSONIG00000004155	spermidine/spermine N1-acetyltransferase family member 2b	sat2b	23.4206	16.2869	1.44053	0.526596	4.43739	9.18636	0.00243826	0.202091	1	protein_coding	ZDB-GENE-040718-292						PTHR10545	DIAMINE ACETYLTRANSFERASE 1 EC_2.3.1.57 POLYAMINE N ACETYLTRANSFERASE 1 PUTRESCINE ACETYLTRANSFERASE SPERMIDINE/SPERMINE N 1 ACETYLTRANSFERASE 1 SSAT SSAT 1			00330+2.3.1.57
ENSONIG00000009868	serine--pyruvate aminotransferase	agxtb	0.454399	1.24484	-2.74158	-1.45501	0.152154	9.19	0.00243341	0.202091	1	protein_coding	ZDB-GENE-010302-3	100707770	I3JU54	GO:0003824;GO:0004760;GO:0008453;GO:0071391	catalytic activity;serine-pyruvate transaminase activity;alanine-glyoxylate transaminase activity;cellular response to estrogen stimulus	molecular_function;biological_process	PTHR21152	SERINE PYRUVATE AMINOTRANSFERASE SPT EC_2.6.1.51 ALANINE GLYOXYLATE AMINOTRANSFERASE AGT EC_2.6.1.- 44	GO:0003674	molecular_function	00440+2.6.1.37
ENSONIG00000017116	GC-rich sequence DNA-binding factor 2	gcfc2	21.1763	15.9446	1.32795	0.4092	4.25368	9.1815	0.00244474	0.202091	2	protein_coding	ZDB-GENE-080204-19	100700589	I3KKD9;I3KKD8	GO:0003700;GO:0005634;GO:0006355;GO:0003677	DNA-binding transcription factor activity;nucleus;regulation of transcription, DNA-templated;DNA binding	molecular_function;cellular_component;biological_process	PTHR12214	GC RICH SEQUENCE DNA BINDING FACTOR 2 GC RICH SEQUENCE DNA BINDING FACTOR TRANSCRIPTION FACTOR 9 TCF 9	GO:0003674;GO:0003677;GO:0005575;GO:0043226;GO:0005634;GO:0003700	molecular_function;DNA binding;cellular_component;organelle;nucleus;DNA-binding transcription factor activity
ENSONIG00000017938			4.99587	8.17087	-1.6394	-0.713164	2.64685	9.17282	0.00245636	0.202107	1	protein_coding				GO:0071526;GO:0017154;GO:0007165;GO:0005515;GO:0016020;GO:0016021	semaphorin-plexin signaling pathway;semaphorin receptor activity;signal transduction;protein binding;membrane;integral component of membrane	biological_process;molecular_function;cellular_component	PTHR22625	PLEXIN PRECURSOR	GO:0003674;GO:0007165;GO:0005575	molecular_function;signal transduction;cellular_component
ENSONIG00000007433			1.21537	2.73622	-2.28093	-1.18962	1.01735	9.14711	0.00249111	0.204017	4	protein_coding							PTHR10338_SF24	INTER ALPHA TRYPSIN INHIBITOR HEAVY CHAIN H3 PRECURSOR ITI HEAVY CHAIN H3 ITI HC3 INTER ALPHA INHIBITOR HEAVY CHAIN 3
ENSONIG00000019436	protein phosphatase 1 regulatory subunit 27		0.207212	0.701343	-3.25748	-1.70376	-0.548578	9.1379	0.00250368	0.204102	1	protein_coding		100707570	I3KTM0	GO:0005515	protein binding	molecular_function	PTHR24179_SF23	PHOSPHATASE 1 REGULATORY SUBUNIT 27 DYSFERLIN INTERACTING 1	GO:0003674	molecular_function
ENSONIG00000012110	interleukin-1 receptor accessory protein-like 1		19.4983	28.4054	-1.46103	-0.546986	4.58148	9.10199	0.00255332	0.207194	1	protein_coding		100693228	I3K298	GO:0007165;GO:0005515;GO:0004908;GO:0016020;GO:0016021;GO:0019221	signal transduction;protein binding;interleukin-1 receptor activity;membrane;integral component of membrane;cytokine-mediated signaling pathway	biological_process;molecular_function;cellular_component	PTHR11890	INTERLEUKIN 1 RECEPTOR PRECURSOR IL IL INTERLEUKIN 1 RECEPTOR	GO:0003674;GO:0007165;GO:0005575	molecular_function;signal transduction;cellular_component
ENSONIG00000006441	E3 ubiquitin-protein ligase SMURF2	SMURF2	36.861	46.6715	-1.26468	-0.338771	5.37525	9.0627	0.00260876	0.210699	1	protein_coding		100698272	I3JGX9	GO:0061630;GO:0004842;GO:0006511;GO:0005515;GO:0016740;GO:0016567	ubiquitin protein ligase activity;ubiquitin-protein transferase activity;ubiquitin-dependent protein catabolic process;protein binding;transferase activity;protein ubiquitination	molecular_function;biological_process	PTHR11254_SF300	E3 UBIQUITIN LIGASE SMURF2 EC_2.3.2.26 HECT TYPE E3 UBIQUITIN TRANSFERASE SMURF2 SMAD UBIQUITINATION REGULATORY FACTOR 2 SMAD SPECIFIC E3 UBIQUITIN LIGASE 2	GO:0003674;GO:0009056;GO:0006464	molecular_function;catabolic process;cellular protein modification process
ENSONIG00000012989			0.398719	1.16214	-2.9847	-1.57758	-0.345796	9.05461	0.00262034	0.210699	1	protein_coding				GO:0016020;GO:0016021	membrane;integral component of membrane	cellular_component	PTHR11481	AFFINITY IMMUNOGLOBULIN GAMMA FC RECEPTOR PRECURSOR IGG FC RECEPTOR	GO:0005575	cellular_component
ENSONIG00000005837	discs, large (Drosophila) homolog-associated protein 2b	dlgap2b	53.6224	75.6308	-1.41171	-0.497443	6.00518	9.04469	0.00263459	0.210886	1	protein_coding	ZDB-GENE-040724-191			GO:0023052;GO:0007270	signaling;neuron-neuron synaptic transmission	biological_process	PTHR12353_SF3	DISKS LARGE ASSOCIATED 2 DAP 2 PSD 95/SAP90 BINDING 2 SAP90/PSD 95 ASSOCIATED 2 SAPAP2	GO:0008150;GO:0007267	biological_process;cell-cell signaling
ENSONIG00000016768	dedicator of cytokinesis 4b	dock4b	128.207	168.354	-1.31408	-0.394052	7.17586	9.01282	0.00268092	0.213628	2	protein_coding	ZDB-GENE-060130-74			GO:0005085;GO:0007264;GO:0005096;GO:0005515;GO:0043547	guanyl-nucleotide exchange factor activity;small GTPase mediated signal transduction;GTPase activator activity;protein binding;positive regulation of GTPase activity	molecular_function;biological_process	PTHR23317_SF75	DEDICATOR OF CYTOKINESIS 4	GO:0003674;GO:0030234;GO:0007165	molecular_function;enzyme regulator activity;signal transduction
ENSONIG00000009211	vigilin	hdlbpb	29.4755	37.3941	-1.27052	-0.345419	4.96855	8.99128	0.00271271	0.215192	2	protein_coding	ZDB-GENE-030131-6822	100709441	I3JRT9;I3JRU0	GO:0003723;GO:0003676	RNA binding;nucleic acid binding	molecular_function	PTHR10627_SF30	UNKNOWN	GO:0003674;GO:0003723	molecular_function;RNA binding
ENSONIG00000003924	G2 and S-phase expressed 1		0.892133	0.184377	4.73173	2.24237	-0.260714	8.98225	0.00272614	0.215292	4	protein_coding		100698065	I3J7V3;I3J7V6;I3J7V4;I3J7V5				PTHR21584	PROLINE/SERINE RICH COILED COIL 1
ENSONIG00000000424	exocyst complex component 6B	exoc6b	13.8387	18.297	-1.32818	-0.409454	3.973	8.97129	0.00274255	0.215625	1	protein_coding	ZDB-GENE-060929-132			GO:0000145;GO:0006904;GO:0006887	exocyst;vesicle docking involved in exocytosis;exocytosis	cellular_component;biological_process	PTHR12702	EXOCYST COMPLEX COMPONENT EXOCYST COMPLEX COMPONENT SEC15	GO:0032991;GO:0005575;GO:0006810;GO:0016192	protein-containing complex;cellular_component;transport;vesicle-mediated transport
ENSONIG00000018366	phosphoglycerate mutase 1		197.485	164.385	1.2013	0.264599	7.57108	8.95155	0.00277235	0.217004	1	protein_coding		100692737	I3KPS8	GO:0016868;GO:0006096;GO:0003824;GO:0004619;GO:0016853;GO:0004082	intramolecular transferase activity, phosphotransferases;glycolytic process;catalytic activity;phosphoglycerate mutase activity;isomerase activity;bisphosphoglycerate mutase activity	molecular_function;biological_process	PTHR11931	PHOSPHOGLYCERATE MUTASE EC_5.4.2.11 EC_5.4.2.- 4 BPG DEPENDENT PGAM	GO:0003674;GO:0009058;GO:0044281;GO:0005975;GO:0009056;GO:0006091;GO:0034641;GO:0051186;GO:0034655;GO:0016853	molecular_function;biosynthetic process;small molecule metabolic process;carbohydrate metabolic process;catabolic process;generation of precursor metabolites and energy;cellular nitrogen compound metabolic process;cofactor metabolic process;nucleobase-containing compound catabolic process;isomerase activity	00680+5.4.2.11;00010+5.4.2.11;00260+5.4.2.11
ENSONIG00000002318	scaffold attachment factor B	safb	175.662	228.794	-1.30201	-0.380736	7.66287	8.92988	0.00280542	0.218625	1	protein_coding	ZDB-GENE-030131-698			GO:0050684;GO:0003676;GO:0006355;GO:0003723	regulation of mRNA processing;nucleic acid binding;regulation of transcription, DNA-templated;RNA binding	biological_process;molecular_function	PTHR15683_SF6	SCAFFOLD ATTACHMENT FACTOR B1 SAF B1	GO:0003674;GO:0003723	molecular_function;RNA binding
ENSONIG00000020089			0.964014	0.24929	3.86759	1.95143	-0.267079	8.9077	0.00283971	0.220327	1	protein_coding				GO:0008305;GO:0007155;GO:0016020;GO:0016021;GO:0007229	integrin complex;cell adhesion;membrane;integral component of membrane;integrin-mediated signaling pathway	cellular_component;biological_process	PTHR23220_SF17	INTEGRIN ALPHA X PRECURSOR CD11 ANTIGEN FAMILY MEMBER C LEUKOCYTE ADHESION GLYCOPROTEIN P150 95 ALPHA CHAIN LEUKOCYTE ADHESION RECEPTOR P150 95 CD11C ANTIGEN	GO:0007155;GO:0032991;GO:0005575;GO:0007165	cell adhesion;protein-containing complex;cellular_component;signal transduction
ENSONIG00000001634			0.138758	0.940456	-6.34854	-2.66642	-0.591815	8.81498	0.00298767	0.221998	2	protein_coding							PTHR11937_SF53	UNKNOWN
ENSONIG00000002074	ELOVL fatty acid elongase 1b	elovl1b	127.21	99.2668	1.2806	0.356825	6.81604	8.88546	0.00287451	0.221998	1	protein_coding	ZDB-GENE-040426-2755		I3J147	GO:0005783;GO:0042761;GO:0019367;GO:0009922;GO:0016021;GO:0016020;GO:0016740;GO:0006629;GO:0005789;GO:0102336;GO:0102337;GO:0102338;GO:0102756;GO:0006631;GO:0006633;GO:0006636;GO:0035338;GO:0034625;GO:0001822;GO:0048794	endoplasmic reticulum;very long-chain fatty acid biosynthetic process;fatty acid elongation, saturated fatty acid;fatty acid elongase activity;integral component of membrane;membrane;transferase activity;lipid metabolic process;endoplasmic reticulum membrane;3-oxo-arachidoyl-CoA synthase activity;3-oxo-cerotoyl-CoA synthase activity;3-oxo-lignoceronyl-CoA synthase activity;very-long-chain 3-ketoa…	cellular_component;biological_process;molecular_function	PTHR11157	ELONGATION OF VERY LONG CHAIN FATTY ACIDS EC_2.3.1.199 3 KETO ACYL COA SYNTHASE ELOVL FATTY ACID ELONGASE ELOVL FA ELONGASE VERY LONG CHAIN 3 KETOACYL COA SYNTHASE VERY LONG CHAIN 3 OXOACYL COA SYNTHASE	GO:0005575;GO:0016746;GO:0009058;GO:0044281;GO:0006629;GO:0043226;GO:0005783;GO:0006790;GO:0034641;GO:0051186;GO:0048856	cellular_component;transferase activity, transferring acyl groups;biosynthetic process;small molecule metabolic process;lipid metabolic process;organelle;endoplasmic reticulum;sulfur compound metabolic process;cellular nitrogen compound metabolic process;cofactor metabolic process;anatomical structure development	00062+2.3.1.199
ENSONIG00000003082	RRAD, Ras related glycolysis inhibitor and calcium channel regulator	rrad	6.99419	10.7385	-1.53709	-0.620203	3.06247	8.83415	0.00295646	0.221998	1	protein_coding	ZDB-GENE-030131-5607	100695564	I3J4S0	GO:1901842;GO:0003924;GO:0005525;GO:0007165;GO:0016020;GO:0000166;GO:0005246	negative regulation of high voltage-gated calcium channel activity;GTPase activity;GTP binding;signal transduction;membrane;nucleotide binding;calcium channel regulator activity	biological_process;molecular_function;cellular_component	PTHR24070_SF74	GTP BINDING RAD RAD1 RAS ASSOCIATED WITH DIABETES	GO:0005575;GO:0007165;GO:0003674;GO:0043167;GO:0003924	cellular_component;signal transduction;molecular_function;ion binding;GTPase activity
ENSONIG00000003406	ADAMTS-like 3	adamtsl3	61.4934	77.1135	-1.25343	-0.325885	6.07978	8.8177	0.00298322	0.221998	1	protein_coding	ZDB-GENE-121030-8			GO:0008233;GO:0006508	peptidase activity;proteolysis	molecular_function;biological_process	PTHR13723_SF169	ADAMTS 3 PRECURSOR ADAMTSL 3 PUNCTIN 2	GO:0008233	peptidase activity
ENSONIG00000008262	synaptotagmin XIVa	syt14a	31.9875	42.2112	-1.3198	-0.400325	5.22315	8.81292	0.00299105	0.221998	1	protein_coding	ZDB-GENE-090313-200			GO:0016020;GO:0016021	membrane;integral component of membrane	cellular_component	PTHR10024_SF209	SYNAPTOTAGMIN 14 SYNAPTOTAGMIN XIV	GO:0005575	cellular_component
ENSONIG00000010961	RIMS binding protein 2	rimbp2	33.3251	48.305	-1.45076	-0.536812	5.34978	8.80888	0.00299769	0.221998	3	protein_coding	ZDB-GENE-040724-96			GO:0005515	protein binding	molecular_function	PTHR14234	RIMS BINDING RIM	GO:0003674	molecular_function
ENSONIG00000011183	G elongation factor mitochondrial 2	gfm2	17.9338	12.5575	1.42975	0.515762	4.03252	8.84716	0.00293545	0.221998	1	protein_coding	ZDB-GENE-060201-3	100700485	I3JYY3	GO:0005739;GO:0003924;GO:0005525;GO:0032790;GO:0000166;GO:0006412;GO:0032543	mitochondrion;GTPase activity;GTP binding;ribosome disassembly;nucleotide binding;translation;mitochondrial translation	cellular_component;molecular_function;biological_process	PTHR23115_SF13	RIBOSOME RELEASING FACTOR 2 MITOCHONDRIAL RRF2MT ELONGATION FACTOR G 2 MITOCHONDRIAL EF G2MT MEF G 2	GO:0003674;GO:0043167;GO:0003924;GO:0005575;GO:0043226;GO:0005739;GO:0009058;GO:0034641;GO:0006412	molecular_function;ion binding;GTPase activity;cellular_component;organelle;mitochondrion;biosynthetic process;cellular nitrogen compound metabolic process;translation
ENSONIG00000015401	EMAP like 6	EML6	8.21096	11.9147	-1.45952	-0.54549	3.2893	8.80028	0.00301184	0.221998	1	protein_coding			I3KE31	GO:0005515	protein binding	molecular_function	PTHR13720_SF8	ECHINODERM MICROTUBULE ASSOCIATED 6 EMAP 6 ECHINODERM MICROTUBULE ASSOCIATED 5	GO:0003674	molecular_function
ENSONIG00000016665	complement C2	si:ch1073-280e3.1	6.25744	10.2618	-1.63704	-0.711087	3.08008	8.80595	0.00300251	0.221998	1	protein_coding	ZDB-GENE-110411-261	100697699	I3KIP8	GO:0004252;GO:0006956;GO:0006508;GO:0005576;GO:0006958	serine-type endopeptidase activity;complement activation;proteolysis;extracellular region;complement activation, classical pathway	molecular_function;biological_process;cellular_component	PTHR19325_SF324	UNCHARACTERIZED	GO:0005575;GO:0005576;GO:0002376;GO:0008233	cellular_component;extracellular region;immune system process;peptidase activity
ENSONIG00000019787	A-kinase anchoring protein 9	AKAP9	45.1163	57.788	-1.28057	-0.356791	5.7176	8.81407	0.00298916	0.221998	3	protein_coding			I3KUW4;I3KUW3;I3KUW5	GO:0032947;GO:0007165	protein-containing complex scaffold activity;signal transduction	molecular_function;biological_process	PTHR18932	A KINASE ANCHOR 9 AKAP 9 A KINASE ANCHOR KDA AKAP 120 KINASE A ANCHORING 9 PRKA9	GO:0007165;GO:0003674;GO:0005198	signal transduction;molecular_function;structural molecule activity
ENSONIG00000021870			5.5058	8.5551	-1.54674	-0.62923	2.7061	8.81932	0.00298058	0.221998	1	miRNA
ENSONIG00000023000			3.19132	5.74619	-1.80507	-0.852051	1.96191	8.85876	0.00291685	0.221998	2	lincRNA
ENSONIG00000025015			91.0729	69.6314	1.30857	0.387989	6.35184	8.78862	0.00303115	0.222494	1	lincRNA
ENSONIG00000016385			1.04992	2.99965	-2.85319	-1.51258	1.0065	8.77906	0.00304708	0.222739	1	protein_coding				GO:0016020;GO:0016021	membrane;integral component of membrane	cellular_component			GO:0005575	cellular_component
ENSONIG00000015785	gamma-aminobutyric acid type A receptor alpha4 subunit	gabra4	19.9551	28.442	-1.42918	-0.515191	4.6498	8.72391	0.00314064	0.228633	2	protein_coding	ZDB-GENE-050417-360	100699411	I3KFH5;I3KFH4	GO:0004890;GO:0006821;GO:0034220;GO:0005230;GO:0005216;GO:0006811;GO:0004888;GO:0016021;GO:0016020;GO:0007214;GO:0005886	GABA-A receptor activity;chloride transport;ion transmembrane transport;extracellular ligand-gated ion channel activity;ion channel activity;ion transport;transmembrane signaling receptor activity;integral component of membrane;membrane;gamma-aminobutyric acid signaling pathway;plasma membrane	molecular_function;biological_process;cellular_component	PTHR18945_SF393	GAMMA AMINOBUTYRIC ACID RECEPTOR SUBUNIT ALPHA 4 PRECURSOR GABA A RECEPTOR SUBUNIT ALPHA 4	GO:0005575;GO:0003674;GO:0006810;GO:0022857;GO:0055085;GO:0007165;GO:0005886	cellular_component;molecular_function;transport;transmembrane transporter activity;transmembrane transport;signal transduction;plasma membrane
ENSONIG00000004845	cornifelin homolog B		2.58709	0.702742	3.69273	1.88469	1.0894	8.66279	0.00324774	0.235461	2	protein_coding		100700962	I3JB56;I3JB57				PTHR15907_SF34	UNCHARACTERIZED
ENSONIG00000004102	sodium-coupled neutral amino acid transporter 3	slc38a3b	307.063	384.312	-1.25163	-0.323804	8.58814	8.63398	0.0032995	0.235893	2	protein_coding	ZDB-GENE-121120-3	100707627	I3J8I0;I3J8H9	GO:0016020;GO:0016021	membrane;integral component of membrane	cellular_component	PTHR22950_SF22	SODIUM COUPLED NEUTRAL AMINO ACID TRANSPORTER 3 N SYSTEM AMINO ACID TRANSPORTER 1 NA + COUPLED NEUTRAL AMINO ACID TRANSPORTER 3 SOLUTE CARRIER FAMILY 38 MEMBER 3 SYSTEM N AMINO ACID TRANSPORTER 1	GO:0005575	cellular_component
ENSONIG00000006161	MYC proto-oncogene, bHLH transcription factor	myca	19.1136	13.1138	1.46064	0.546603	3.91357	8.60792	0.00334704	0.235893	1	protein_coding	ZDB-GENE-990415-162	100689989	I3JFX0	GO:0003700;GO:0005634;GO:0006355;GO:0046983;GO:0003677	DNA-binding transcription factor activity;nucleus;regulation of transcription, DNA-templated;protein dimerization activity;DNA binding	molecular_function;cellular_component;biological_process	PTHR11514_SF2	MYC PROTO ONCOGENE PROTO ONCOGENE C MYC TRANSCRIPTION FACTOR P64	GO:0003674;GO:0005575;GO:0043226;GO:0005634;GO:0003700;GO:0003677	molecular_function;cellular_component;organelle;nucleus;DNA-binding transcription factor activity;DNA binding
ENSONIG00000007282			8.80334	14.0131	-1.59993	-0.678005	3.45467	8.62652	0.00331304	0.235893	2	protein_coding				GO:0043484;GO:0003723;GO:0003676;GO:0005634;GO:0006397;GO:0008380	regulation of RNA splicing;RNA binding;nucleic acid binding;nucleus;mRNA processing;RNA splicing	biological_process;molecular_function;cellular_component	PTHR15597_SF7	RNA BINDING FOX 1 HOMOLOG 3 FOX 1 HOMOLOG C NEURONAL NUCLEI ANTIGEN NEUN ANTIGEN	GO:0003674;GO:0003723;GO:0005575;GO:0043226;GO:0005634;GO:0034641;GO:0006397	molecular_function;RNA binding;cellular_component;organelle;nucleus;cellular nitrogen compound metabolic process;mRNA processing
ENSONIG00000011159	NLR family CARD domain containing 5	NLRC5	3.14734	1.12456	2.80381	1.48739	1.11104	8.61124	0.00334095	0.235893	2	protein_coding		102078358	I3JYV5;I3JYV4	GO:0005515;GO:0000166;GO:0005524	protein binding;nucleotide binding;ATP binding	molecular_function	PTHR24106_SF69	NLRC5	GO:0003674;GO:0043167	molecular_function;ion binding
ENSONIG00000012585	ubiquitin like with PHD and ring finger domains 1	uhrf1	5.3227	2.92389	1.80753	0.854023	2.0003	8.6446	0.00328033	0.235893	1	protein_coding	ZDB-GENE-040426-2039	100690474	I3K3Z6	GO:0046872;GO:0005515;GO:0005634;GO:0001889;GO:0002088;GO:0006954;GO:0010216;GO:0031100;GO:0044027;GO:0060729	metal ion binding;protein binding;nucleus;liver development;lens development in camera-type eye;inflammatory response;maintenance of DNA methylation;animal organ regeneration;hypermethylation of CpG island;intestinal epithelial structure maintenance	molecular_function;cellular_component;biological_process	PTHR14140	E3 UBIQUITIN LIGASE UHRF1 EC_2.3.2.27 RING TYPE E3 UBIQUITIN TRANSFERASE UHRF1 UBIQUITIN PHD AND RING FINGER DOMAIN CONTAINING 1 UBIQUITIN CONTAINING PHD AND RING FINGER DOMAINS 1	GO:0003674;GO:0043167;GO:0005575;GO:0043226;GO:0005634;GO:0048856;GO:0006950;GO:0006259;GO:0034641;GO:0042592	molecular_function;ion binding;cellular_component;organelle;nucleus;anatomical structure development;response to stress;DNA metabolic process;cellular nitrogen compound metabolic process;homeostatic process
ENSONIG00000014362	insulin receptor substrate 2b	irs2b	68.516	85.747	-1.25078	-0.322833	6.22207	8.61809	0.00332841	0.235893	1	protein_coding	ZDB-GENE-081104-462			GO:0008286;GO:0005158	insulin receptor signaling pathway;insulin receptor binding	biological_process;molecular_function	PTHR10614_SF7	INSULIN RECEPTOR SUBSTRATE 2 IRS 2	GO:0003674;GO:0007165	molecular_function;signal transduction
ENSONIG00000023732			0.619922	1.41714	-2.26654	-1.18049	0.0203208	8.61295	0.00333781	0.235893	1	lincRNA
ENSONIG00000006428	nemo-like kinase, type 2	nlk2	17.888	23.6322	-1.32429	-0.405217	4.34172	8.57244	0.0034129	0.23729	1	protein_coding	ZDB-GENE-080320-1			GO:0004707;GO:0006468;GO:0004672;GO:0005524;GO:0016740;GO:0000166;GO:0004674;GO:0016301;GO:0016310;GO:0000165;GO:0018107;GO:0030177;GO:0030901	MAP kinase activity;protein phosphorylation;protein kinase activity;ATP binding;transferase activity;nucleotide binding;protein serine/threonine kinase activity;kinase activity;phosphorylation;MAPK cascade;peptidyl-threonine phosphorylation;positive regulation of Wnt signaling pathway;midbrain development	molecular_function;biological_process	PTHR24055_SF179	SERINE/THREONINE KINASE NLK EC_2.7.11.24 NEMO KINASE	GO:0003674;GO:0043167;GO:0016301;GO:0006464;GO:0007165;GO:0048856	molecular_function;ion binding;kinase activity;cellular protein modification process;signal transduction;anatomical structure development	04150+2.7.11.24
ENSONIG00000007151			0.793454	2.14998	-2.67226	-1.41806	0.590454	8.56837	0.00342052	0.23729	1	protein_coding							PTHR10489_SF537	UNCHARACTERIZED
ENSONIG00000008451	E1A binding protein p300 b	ep300b	24.9729	34.2747	-1.37514	-0.459575	4.88075	8.58109	0.00339672	0.23729	1	protein_coding	ZDB-GENE-080403-15			GO:0003713;GO:0016573;GO:0004402;GO:0003712;GO:0008270;GO:0005634;GO:0006355;GO:0005515;GO:0000123;GO:0016740;GO:0046872;GO:0016746;GO:1903508;GO:0001947;GO:0033339;GO:0048701	transcription coactivator activity;histone acetylation;histone acetyltransferase activity;transcription coregulator activity;zinc ion binding;nucleus;regulation of transcription, DNA-templated;protein binding;histone acetyltransferase complex;transferase activity;metal ion binding;transferase activity, transferring acyl groups;positive regulation of nucleic acid-templated transcription;heart loop…	molecular_function;biological_process;cellular_component	PTHR13808_SF4	HISTONE ACETYLTRANSFERASE P300 P300 HAT EC_2.3.1.48 E1A ASSOCIATED P300 HISTONE BUTYRYLTRANSFERASE P300 EC_2.3.1.- HISTONE CROTONYLTRANSFERASE P300 EC_2.3.-.- 1 PROPIONYLTRANSFERASE P300 EC 2.3.1.-	GO:0003674;GO:0005575;GO:0043226;GO:0005634;GO:0043167;GO:0016746;GO:0006464;GO:0032991;GO:0048856;GO:0009790	molecular_function;cellular_component;organelle;nucleus;ion binding;transferase activity, transferring acyl groups;cellular protein modification process;protein-containing complex;anatomical structure development;embryo development
ENSONIG00000016784	E3 ubiquitin-protein ligase HECW2	hecw2a	91.7271	114.529	-1.2498	-0.321693	6.67317	8.58237	0.00339433	0.23729	2	protein_coding	ZDB-GENE-090311-22	100692390	I3KJ53;I3KJ54	GO:0004842;GO:0005515;GO:0016740;GO:0016567	ubiquitin-protein transferase activity;protein binding;transferase activity;protein ubiquitination	molecular_function;biological_process	PTHR11254_SF127	E3 UBIQUITIN LIGASE HECW2 EC_2.3.2.26 HECT C2 AND WW DOMAIN CONTAINING 2 HECT TYPE E3 UBIQUITIN TRANSFERASE HECW2 NEDD4 E3 UBIQUITIN LIGASE 2	GO:0003674;GO:0006464	molecular_function;cellular protein modification process
ENSONIG00000010902	E3 ubiquitin-protein ligase TRIM41	btr01	2.35373	5.46592	-2.31811	-1.21295	1.841	8.56116	0.0034341	0.237302	2	protein_coding	ZDB-GENE-090511-2	100702690		GO:0008270;GO:0005515;GO:0046872;GO:0001666	zinc ion binding;protein binding;metal ion binding;response to hypoxia	molecular_function;biological_process	PTHR24103_SF320	AMBIGUOUS	GO:0003674;GO:0043167;GO:0006950	molecular_function;ion binding;response to stress
ENSONIG00000021084			122.655	155.932	-1.27216	-0.347276	7.15284	8.54838	0.0034583	0.238044	1	protein_coding
ENSONIG00000017508	3'-phosphoadenosine 5'-phosphosulfate synthase 1	papss1	15.1886	42.4477	-2.79377	-1.48222	4.86932	8.53984	0.00347455	0.238236	1	protein_coding	ZDB-GENE-080721-5	100705249	I3KLT3	GO:0004781;GO:0000103;GO:0004020;GO:0005524;GO:0016310	sulfate adenylyltransferase (ATP) activity;sulfate assimilation;adenylylsulfate kinase activity;ATP binding;phosphorylation	molecular_function;biological_process	PTHR11055	SULFATE ADENYLYLTRANSFERASE EC_2.7.7.4 ATP SULFURYLASE SULFATE ADENYLATE TRANSFERASE SAT	GO:0003674;GO:0043167;GO:0016301;GO:0006790;GO:0016779	molecular_function;ion binding;kinase activity;sulfur compound metabolic process;nucleotidyltransferase activity	00230+2.7.1.25;00920+2.7.1.25;00261+2.7.7.4;00230+2.7.7.4;00450+2.7.7.4;00920+2.7.7.4
ENSONIG00000006122	charged multivesicular body protein 5	chmp5b	22.4159	15.261	1.46867	0.554513	4.17944	8.51721	0.00351803	0.240286	1	protein_coding	ZDB-GENE-040426-1374	100710999	I3JFS3	GO:0007034	vacuolar transport	biological_process	PTHR22761_SF12	CHARGED MULTIVESICULAR BODY 5 CHROMATIN MODIFYING 5	GO:0006810;GO:0007034	transport;vacuolar transport
ENSONIG00000000120	PNN interacting serine and arginine rich protein	pnisr	144.419	181.599	-1.25729	-0.330323	7.31887	8.4862	0.00357851	0.240699	2	protein_coding	ZDB-GENE-030131-362	100694533	I3IU59;I3IU58				PTHR31518	ARGININE/SERINE RICH PNISR SERINE/ARGININE RICH SPLICING REGULATORY 130 SRRP130 SPLICING FACTOR ARGININE/SERINE RICH 130 SPLICING FACTOR ARGININE/SERINE RICH 18
ENSONIG00000000803	delta-type opioid receptor	oprm1	285.062	215.753	1.32132	0.401984	8.17972	8.49227	0.00356659	0.240699	1	protein_coding	ZDB-GENE-010125-1	100712332	I3IWN1	GO:0004979;GO:0004985;GO:0016021;GO:0007186;GO:0004930;GO:0016020;GO:0007165;GO:0007218;GO:0038046;GO:0038047;GO:0038003;GO:0071315;GO:0005887	beta-endorphin receptor activity;opioid receptor activity;integral component of membrane;G protein-coupled receptor signaling pathway;G protein-coupled receptor activity;membrane;signal transduction;neuropeptide signaling pathway;enkephalin receptor activity;morphine receptor activity;opioid receptor signaling pathway;cellular response to morphine;integral component of plasma membrane	molecular_function;cellular_component;biological_process	PTHR24229_SF7	MU TYPE OPIOID RECEPTOR M OR 1 MOR 1	GO:0003674;GO:0007165;GO:0005575	molecular_function;signal transduction;cellular_component
ENSONIG00000004689	CUB and Sushi multiple domains 2	csmd2	68.8203	102.145	-1.4855	-0.570951	6.33864	8.49665	0.00355802	0.240699	1	protein_coding	ZDB-GENE-030616-39			GO:0016020;GO:0016021	membrane;integral component of membrane	cellular_component	PTHR19325_SF330	COMPLEMENT RECEPTOR TYPE 2 PRECURSOR CR2 COMPLEMENT C3D RECEPTOR CD21 ANTIGEN	GO:0005575	cellular_component
ENSONIG00000014015			2.33108	0.395703	5.92668	2.56723	0.828415	8.50541	0.00354091	0.240699	1	protein_coding				GO:0016567;GO:0004842;GO:0008270;GO:0005515;GO:0046872	protein ubiquitination;ubiquitin-protein transferase activity;zinc ion binding;protein binding;metal ion binding	biological_process;molecular_function	PTHR24103_SF249	AMBIGUOUS	GO:0003674;GO:0043167;GO:0006464	molecular_function;ion binding;cellular protein modification process
ENSONIG00000006728	MYC binding protein 2	mycbp2	218.514	275.203	-1.25942	-0.332765	7.94444	8.45819	0.00363403	0.241777	2	protein_coding	ZDB-GENE-030616-132			GO:0016567;GO:0004842;GO:0007411;GO:0016198;GO:0021986;GO:0031290;GO:0042068;GO:0048066;GO:0005737	protein ubiquitination;ubiquitin-protein transferase activity;axon guidance;axon choice point recognition;habenula development;retinal ganglion cell axon guidance;regulation of pteridine metabolic process;developmental pigmentation;cytoplasm	biological_process;molecular_function;cellular_component	PTHR12846_SF14	E3 UBIQUITIN LIGASE MYCBP2 EC_2.3.2.- MYC BINDING 2 ASSOCIATED WITH MYC	GO:0006464;GO:0048856;GO:0043473;GO:0005575;GO:0005737	cellular protein modification process;anatomical structure development;pigmentation;cellular_component;cytoplasm
ENSONIG00000011867	guanylyl cyclase 2	gc2	0.0519927	8.40626	-148.515	-7.21447	1.93767	8.45744	0.00363554	0.241777	2	protein_coding	ZDB-GENE-011128-8			GO:0009190;GO:0016849;GO:0035556;GO:0006468;GO:0004672;GO:0005524;GO:0004383;GO:0006182;GO:0016020;GO:0016021;GO:0000166;GO:0016829	cyclic nucleotide biosynthetic process;phosphorus-oxygen lyase activity;intracellular signal transduction;protein phosphorylation;protein kinase activity;ATP binding;guanylate cyclase activity;cGMP biosynthetic process;membrane;integral component of membrane;nucleotide binding;lyase activity	biological_process;molecular_function;cellular_component	PTHR11920_SF249	GUANYLATE CYCLASE EC_4.6.1.2	GO:0003674;GO:0043167;GO:0016301;GO:0006464;GO:0007165;GO:0016829;GO:0009058;GO:0044281;GO:0034641;GO:0005575	molecular_function;ion binding;kinase activity;cellular protein modification process;signal transduction;lyase activity;biosynthetic process;small molecule metabolic process;cellular nitrogen compound metabolic process;cellular_component	00230+4.6.1.2
ENSONIG00000018790	interferon-induced protein 44		1.17833	0.408395	2.84801	1.50995	0.303559	8.46377	0.0036229	0.241777	1	protein_coding		100690833	I3KRB2	GO:0005525	GTP binding	molecular_function	PTHR14241_SF1	INTERFERON INDUCED 44	GO:0003674;GO:0043167	molecular_function;ion binding
ENSONIG00000003185	adhesion G protein-coupled receptor G3	adgrg3	3.27052	5.98666	-1.82213	-0.865625	2.19418	8.44592	0.00365862	0.242401	2	protein_coding	ZDB-GENE-140106-110			GO:0004888;GO:0007166;GO:0016021;GO:0007186;GO:0004930;GO:0016020	transmembrane signaling receptor activity;cell surface receptor signaling pathway;integral component of membrane;G protein-coupled receptor signaling pathway;G protein-coupled receptor activity;membrane	molecular_function;biological_process;cellular_component	PTHR12011_SF273	G COUPLED RECEPTOR	GO:0003674;GO:0007165;GO:0005575	molecular_function;signal transduction;cellular_component
ENSONIG00000016918			3.36894	1.33731	2.49513	1.31912	1.27313	8.41118	0.00372921	0.246156	1	protein_coding			I3KJN7	GO:0030145;GO:0004721;GO:0005506;GO:0016787;GO:0005509;GO:0005515;GO:0050906;GO:0046872;GO:0006470	manganese ion binding;phosphoprotein phosphatase activity;iron ion binding;hydrolase activity;calcium ion binding;protein binding;detection of stimulus involved in sensory perception;metal ion binding;protein dephosphorylation	molecular_function;biological_process	PTHR11668_SF214	SERINE/THREONINE PHOSPHATASE WITH EF HANDS 2 PPEF 2 EC_3.1.3.16	GO:0003674;GO:0043167;GO:0016791;GO:0006464	molecular_function;ion binding;phosphatase activity;cellular protein modification process	04660+3.1.3.16;04658+3.1.3.16
ENSONIG00000014493	Dmx like 1	DMXL1	55.1328	70.689	-1.28272	-0.359201	5.95793	8.38074	0.00379218	0.249382	1	protein_coding			I3KAT6	GO:0005515	protein binding	molecular_function	PTHR13950	DMX	GO:0003674	molecular_function
ENSONIG00000008725	distal-less homeobox 1	dlx1a	77.5899	62.5322	1.24128	0.311831	6.10804	8.35459	0.00384714	0.251129	1	protein_coding	ZDB-GENE-990415-48	100701462	I3JQ22	GO:0043565;GO:0006355;GO:0003677;GO:0005634;GO:0048703;GO:0051216	sequence-specific DNA binding;regulation of transcription, DNA-templated;DNA binding;nucleus;embryonic viscerocranium morphogenesis;cartilage development	molecular_function;biological_process;cellular_component	PTHR24327_SF21	HOMEOBOX DLX 1	GO:0003674;GO:0003677;GO:0005575;GO:0043226;GO:0005634;GO:0048856;GO:0009790	molecular_function;DNA binding;cellular_component;organelle;nucleus;anatomical structure development;embryo development
ENSONIG00000010376	microtubule associated monooxygenase, calponin and LIM domain containing 3a	mical3a	192.703	239.267	-1.24174	-0.312363	7.71667	8.35697	0.00384212	0.251129	1	protein_coding	ZDB-GENE-050126-2			GO:0071949;GO:0006887;GO:0017137;GO:0005515;GO:0016709;GO:0046872;GO:0055114	FAD binding;exocytosis;Rab GTPase binding;protein binding;oxidoreductase activity, acting on paired donors, with incorporation or reduction of molecular oxygen, NAD(P)H as one donor, and incorporation of one atom of oxygen;metal ion binding;oxidation-reduction process	molecular_function;biological_process	PTHR11915_SF218	[F ACTIN] MONOOXYGENASE MICAL3 EC_1.14.13.225 MOLECULE INTERACTING WITH CASL 3 MICAL 3	GO:0003674;GO:0006810;GO:0016192;GO:0043167	molecular_function;transport;vesicle-mediated transport;ion binding
ENSONIG00000003756	CLK4 associating serine/arginine rich protein	clasrp	34.4482	46.7161	-1.35645	-0.439832	5.30343	8.32459	0.00391119	0.254371	1	protein_coding	ZDB-GENE-060503-837	100697095	I3J785				PTHR13161	SPLICING FACTOR SPLICING FACTOR ARGININE/SERINE RICH SUPPRESSOR OF WHITE APRICOT HOMOLOG
ENSONIG00000025085			10.5043	15.6404	-1.49234	-0.577576	3.58565	8.30251	0.00395904	0.25654	2	lincRNA
ENSONIG00000019819	glucuronokinase with putative uridyl pyrophosphorylase	gkup	12.9494	17.6851	-1.36409	-0.447935	4.05764	8.25706	0.00405937	0.262081	1	protein_coding	ZDB-GENE-080204-36			GO:0016779;GO:0009058;GO:0005524;GO:0016310;GO:0047940	nucleotidyltransferase activity;biosynthetic process;ATP binding;phosphorylation;glucuronokinase activity	molecular_function;biological_process	TF628283	UNCHARACTERIZED	GO:0003674;GO:0043167;GO:0009058;GO:0016779;GO:0016301	molecular_function;ion binding;biosynthetic process;nucleotidyltransferase activity;kinase activity
ENSONIG00000010535			1.25377	2.76577	-2.16319	-1.11316	1.16266	8.23097	0.00411816	0.26395	2	protein_coding							PTHR13802	PRECURSOR
ENSONIG00000011088	PGAM family member 5, serine/threonine protein phosphatase, mitochondrial	pgam5	67.3651	55.188	1.22118	0.288276	5.86507	8.23662	0.00410535	0.26395	2	protein_coding	ZDB-GENE-030131-683						PTHR20935_SF0	SERINE/THREONINE PHOSPHATASE PGAM5 MITOCHONDRIAL EC_3.1.3.16 PHOSPHOGLYCERATE MUTASE FAMILY MEMBER 5
ENSONIG00000017483	basonuclin 2	bnc2	39.3029	55.7345	-1.41754	-0.503392	5.56393	8.21637	0.00415142	0.265121	1	protein_coding	ZDB-GENE-030131-5784			GO:0003676;GO:0048066;GO:0005634	nucleic acid binding;developmental pigmentation;nucleus	molecular_function;biological_process;cellular_component	PTHR15021	ZINC FINGER BASONUCLIN	GO:0003674;GO:0043473;GO:0005575;GO:0043226;GO:0005634	molecular_function;pigmentation;cellular_component;organelle;nucleus
ENSONIG00000000951	uncharacterized LOC100706178		1140.51	865.819	1.31729	0.39757	9.93306	8.18042	0.00423449	0.267408	1	protein_coding		100706178	I3IX63	GO:0019882;GO:0042289;GO:0006955;GO:0006886;GO:0016020;GO:0016021;GO:0005623	antigen processing and presentation;MHC class II protein binding;immune response;intracellular protein transport;membrane;integral component of membrane;cell	biological_process;molecular_function;cellular_component	TF659616	CD74 MOLECULE MAJOR HISTOCOMPATIBILITY COMPLEX CLASS II INVARIANT CHAIN B	GO:0005575;GO:0006810;GO:0002376;GO:0003674;GO:0005623	cellular_component;transport;immune system process;molecular_function;cell
ENSONIG00000001269			5.01756	7.89595	-1.57634	-0.656583	2.69499	8.17478	0.00424769	0.267408	1	protein_coding				GO:0007018;GO:0008017;GO:0003777;GO:0005524;GO:0000166	microtubule-based movement;microtubule binding;microtubule motor activity;ATP binding;nucleotide binding	biological_process;molecular_function	PTHR24115_SF363	KINESIN KIF26B	GO:0003674;GO:0043167;GO:0008092	molecular_function;ion binding;cytoskeletal protein binding
ENSONIG00000004989	microtubule-actin crosslinking factor 1	MACF1	133.44	163.646	-1.22701	-0.295142	7.17982	8.19057	0.00421088	0.267408	1	protein_coding			I3JBN7	GO:0007010;GO:0008017;GO:0008092;GO:0005856;GO:0005509;GO:0005515;GO:0003779	cytoskeleton organization;microtubule binding;cytoskeletal protein binding;cytoskeleton;calcium ion binding;protein binding;actin binding	biological_process;molecular_function;cellular_component	PTHR11915_SF37	MICROTUBULE ACTIN CROSS LINKING FACTOR 1 ACTIN CROSS LINKING FAMILY 7	GO:0003674;GO:0043167;GO:0005575;GO:0043226;GO:0005856;GO:0008092;GO:0007010	molecular_function;ion binding;cellular_component;organelle;cytoskeleton;cytoskeletal protein binding;cytoskeleton organization
ENSONIG00000012645	cartilage oligomeric matrix protein	comp	88.3008	109.131	-1.2355	-0.305089	6.60639	8.18584	0.00422186	0.267408	1	protein_coding	ZDB-GENE-060606-1			GO:0007155;GO:0005576;GO:0005509	cell adhesion;extracellular region;calcium ion binding	biological_process;cellular_component;molecular_function	PTHR10199_SF77	CARTILAGE OLIGOMERIC MATRIX	GO:0003674;GO:0043167;GO:0005575;GO:0005576;GO:0007155	molecular_function;ion binding;cellular_component;extracellular region;cell adhesion
ENSONIG00000019277	bcl-2-related ovarian killer protein homolog A	boka	5.73428	2.9902	1.91994	0.941059	2.24783	8.15236	0.00430051	0.269773	1	protein_coding	ZDB-GENE-040801-131	100689837	I3KT16	GO:0042981	regulation of apoptotic process	biological_process	PTHR11256	BCL 2
ENSONIG00000018496	paired box protein Pax-2a	PAX2	3.24047	0.638499	5.02592	2.32939	1.1584	8.14061	0.00432848	0.270568	2	protein_coding		100697440	I3KQ93;I3KQ92	GO:0006355;GO:0003677;GO:0005634;GO:0007275	regulation of transcription, DNA-templated;DNA binding;nucleus;multicellular organism development	biological_process;molecular_function;cellular_component	PTHR24329_SF172	PAIRED BOX PAX 2	GO:0003674;GO:0003677;GO:0005575;GO:0043226;GO:0005634;GO:0048856	molecular_function;DNA binding;cellular_component;organelle;nucleus;anatomical structure development
ENSONIG00000001457	hemoglobin subunit epsilon 1	HBE1	357.649	101.67	3.5174	1.81451	7.61797	8.13102	0.00435141	0.271044	1	protein_coding			I3IYZ1	GO:0005833;GO:0015671;GO:0019825;GO:0020037;GO:0046872;GO:0005344	hemoglobin complex;oxygen transport;oxygen binding;heme binding;metal ion binding;oxygen carrier activity	cellular_component;biological_process;molecular_function	PTHR11442_SF7	HEMOGLOBIN SUBUNIT BETA BETA GLOBIN HEMOGLOBIN BETA CHAIN	GO:0003674;GO:0006810;GO:0032991;GO:0005575;GO:0043167	molecular_function;transport;protein-containing complex;cellular_component;ion binding
ENSONIG00000011693			0.374394	1.18104	-3.11715	-1.64023	-0.212157	8.11886	0.00438071	0.271371	1	protein_coding				GO:0008270;GO:0046872	zinc ion binding;metal ion binding	molecular_function	PTHR25462_SF201	TRIM	GO:0003674;GO:0043167	molecular_function;ion binding
ENSONIG00000019185			3.01404	5.47637	-1.81295	-0.858342	2.06609	8.11612	0.00438734	0.271371	1	protein_coding				GO:0005515;GO:0000166;GO:0005524	protein binding;nucleotide binding;ATP binding	molecular_function	PTHR24106_SF58	AMBIGUOUS	GO:0003674;GO:0043167	molecular_function;ion binding
ENSONIG00000003374	transmembrane protein 39A	tmem39a	4.52633	7.72607	-1.70919	-0.773315	2.59658	8.07458	0.00448905	0.271665	2	protein_coding	ZDB-GENE-030131-1928	100697516	I3J5V9;I3J5V8	GO:0016020;GO:0016021	membrane;integral component of membrane	cellular_component	PTHR12995	TRANSMEMBRANE	GO:0005575	cellular_component
ENSONIG00000005756	DEAD-box helicase 6	ddx6	69.706	39.11	1.78303	0.834331	5.80641	8.07033	0.00449959	0.271665	1	protein_coding	ZDB-GENE-070912-83	100711311	I3JEG5	GO:0005524;GO:0003676;GO:0000166;GO:0016787;GO:0004386;GO:0009408;GO:0034063;GO:0036464	ATP binding;nucleic acid binding;nucleotide binding;hydrolase activity;helicase activity;response to heat;stress granule assembly;cytoplasmic ribonucleoprotein granule	molecular_function;biological_process;cellular_component	PTHR24031_SF214	ATP DEPENDENT RNA HELICASE DDX6 EC_3.6.4.13 ATP DEPENDENT RNA HELICASE P54 DEAD BOX 6	GO:0003674;GO:0043167;GO:0004386;GO:0006950;GO:0022607;GO:0022618;GO:0065003;GO:0032991;GO:0005575;GO:0043226	molecular_function;ion binding;helicase activity;response to stress;cellular component assembly;ribonucleoprotein complex assembly;protein-containing complex assembly;protein-containing complex;cellular_component;organelle
ENSONIG00000014275	ornithine carbamoyltransferase	otc	2.91109	5.99719	-2.06144	-1.04365	1.85076	8.09062	0.00444948	0.271665	1	protein_coding	ZDB-GENE-070912-422	100708459	I3K9Z9	GO:0006520;GO:0016597;GO:0016743;GO:0016740	cellular amino acid metabolic process;amino acid binding;carboxyl- or carbamoyltransferase activity;transferase activity	biological_process;molecular_function	PTHR11405_SF1	ORNITHINE CARBAMOYLTRANSFERASE MITOCHONDRIAL PRECURSOR EC_2.1.3.3 ORNITHINE TRANSCARBAMYLASE OTCASE	GO:0044281;GO:0006520;GO:0003674;GO:0043167	small molecule metabolic process;cellular amino acid metabolic process;molecular_function;ion binding	00220+2.1.3.3
ENSONIG00000014456	aminoacylase 1	acy1	44.7144	57.1436	-1.27824	-0.354158	5.70589	8.0971	0.00443361	0.271665	1	protein_coding	ZDB-GENE-040426-755	100694810	I3KAN0	GO:0006520;GO:0008237;GO:0005737;GO:0006508;GO:0016787;GO:0004046	cellular amino acid metabolic process;metallopeptidase activity;cytoplasm;proteolysis;hydrolase activity;aminoacylase activity	biological_process;molecular_function;cellular_component	PTHR11014_SF8	AMINOACYLASE ACY EC_3.5.1.14 N ACYL L AMINO ACID AMIDOHYDROLASE	GO:0005575;GO:0005737;GO:0008233;GO:0044281;GO:0006520;GO:0016810	cellular_component;cytoplasm;peptidase activity;small molecule metabolic process;cellular amino acid metabolic process;hydrolase activity, acting on carbon-nitrogen (but not peptide) bonds	00220+3.5.1.14
ENSONIG00000022619			1.06219	2.65333	-2.50196	-1.32306	0.870229	8.07575	0.00448614	0.271665	1	lincRNA
ENSONIG00000025715			3.75058	1.51941	2.463	1.30042	1.34629	8.10384	0.00441717	0.271665	1	lincRNA
ENSONIG00000026781			4.68631	2.55775	1.82691	0.869407	1.83476	8.0847	0.00446406	0.271665	1	lincRNA
ENSONIG00000018688	androgen-induced gene 1 protein	pex3	66.2372	54.7085	1.21177	0.277116	5.99375	8.02572	0.00461177	0.277491	1	protein_coding	ZDB-GENE-040426-979	100703533	I3KQY0	GO:0007031;GO:0005779	peroxisome organization;integral component of peroxisomal membrane	biological_process;cellular_component	TF628365	PEROXISOMAL BIOGENESIS FACTOR	GO:0005575	cellular_component
ENSONIG00000009523	glutamate receptor 4	gria4b	50.1427	63.1696	-1.25841	-0.331599	5.77324	8.01665	0.00463492	0.277938	1	protein_coding	ZDB-GENE-030131-8013	100690133	I3JSW8	GO:0038023;GO:0005216;GO:0004970;GO:0006811;GO:0016020;GO:0016021;GO:0034220;GO:0005886;GO:0030054;GO:0035235;GO:0045202;GO:0045211	signaling receptor activity;ion channel activity;ionotropic glutamate receptor activity;ion transport;membrane;integral component of membrane;ion transmembrane transport;plasma membrane;cell junction;ionotropic glutamate receptor signaling pathway;synapse;postsynaptic membrane	molecular_function;biological_process;cellular_component	PTHR18966_SF100	GLUTAMATE RECEPTOR 4 PRECURSOR GLUR 4 GLUR4 AMPA SELECTIVE GLUTAMATE RECEPTOR 4 GLUR D GLUTAMATE RECEPTOR IONOTROPIC AMPA 4 GLUA4	GO:0005575;GO:0006810;GO:0022857;GO:0003674;GO:0055085;GO:0005886;GO:0007165	cellular_component;transport;transmembrane transporter activity;molecular_function;transmembrane transport;plasma membrane;signal transduction
ENSONIG00000003771			36.954	49.2304	-1.33238	-0.414004	5.42031	8.00538	0.00466385	0.278728	1	protein_coding				GO:0005887;GO:0016021;GO:0007186;GO:0004930;GO:0016907;GO:0040012;GO:0016020;GO:0007165;GO:0005886;GO:0030054;GO:0045202;GO:0045211;GO:0007213	integral component of plasma membrane;integral component of membrane;G protein-coupled receptor signaling pathway;G protein-coupled receptor activity;G protein-coupled acetylcholine receptor activity;regulation of locomotion;membrane;signal transduction;plasma membrane;cell junction;synapse;postsynaptic membrane;G protein-coupled acetylcholine receptor signaling pathway	cellular_component;biological_process;molecular_function	PTHR24249_SF60	MUSCARINIC ACETYLCHOLINE RECEPTOR M4	GO:0003674;GO:0007165;GO:0005575;GO:0005886	molecular_function;signal transduction;cellular_component;plasma membrane
ENSONIG00000002145	si:dkey-117i10.1	si:dkey-117i10.1	5.69828	0.372575	15.0642	3.91305	2.32809	7.99544	0.00468954	0.27932	1	protein_coding	ZDB-GENE-091204-371			GO:0005834;GO:0003924;GO:0007186;GO:0016020;GO:0007165;GO:0005886	heterotrimeric G-protein complex;GTPase activity;G protein-coupled receptor signaling pathway;membrane;signal transduction;plasma membrane	cellular_component;molecular_function;biological_process	PTHR13809	GUANINE NUCLEOTIDE BINDING SUBUNIT GAMMA	GO:0007165;GO:0003924;GO:0032991;GO:0005575;GO:0005886	signal transduction;GTPase activity;protein-containing complex;cellular_component;plasma membrane
ENSONIG00000004221	peptidyl-prolyl cis-trans isomerase FKBP5	fkbp5	67.3626	104.49	-1.55164	-0.633796	6.46256	7.94974	0.00480944	0.281256	1	protein_coding	ZDB-GENE-030616-630	100711482	I3J8X2	GO:0000413;GO:0031072;GO:0003755;GO:0005515;GO:0005528;GO:0016853	protein peptidyl-prolyl isomerization;heat shock protein binding;peptidyl-prolyl cis-trans isomerase activity;protein binding;FK506 binding;isomerase activity	biological_process;molecular_function	PTHR10516_SF26	PEPTIDYL PROLYL CIS TRANS ISOMERASE FKBP5 PPIASE FKBP5 EC_5.2.1.8.51 KDA FK506 BINDING 51 KDA FKBP FKBP 51 FK506 BINDING 5 FKBP 5 ROTAMASE	GO:0003674;GO:0016853;GO:0006464	molecular_function;isomerase activity;cellular protein modification process
ENSONIG00000005923	cytochrome b5	cyb5b	110.751	91.7709	1.20774	0.272312	6.71142	7.91825	0.00489386	0.281256	1	protein_coding	ZDB-GENE-040426-2614	100711554	I3JF16	GO:0020037;GO:0016020;GO:0016021;GO:0046872	heme binding;membrane;integral component of membrane;metal ion binding	molecular_function;cellular_component	PTHR19359_SF16	CYTOCHROME B5 TYPE B PRECURSOR CYTOCHROME B5 OUTER MITOCHONDRIAL MEMBRANE	GO:0003674;GO:0005575;GO:0043167	molecular_function;cellular_component;ion binding
ENSONIG00000007237	jumonji domain containing 1Cb	jmjd1cb	62.8245	83.0095	-1.32118	-0.401822	6.15154	7.97028	0.00475515	0.281256	2	protein_coding	ZDB-GENE-121214-344			GO:0030097;GO:0061515	hemopoiesis;myeloid cell development	biological_process	PTHR12549_SF6	PROBABLE JMJC DOMAIN CONTAINING HISTONE DEMETHYLATION 2C EC_1.14.11.- JUMONJI DOMAIN CONTAINING 1C	GO:0048856	anatomical structure development
ENSONIG00000008453	zinc finger CCHC-type containing 10		22.5316	17.2216	1.31214	0.391921	4.29532	7.91711	0.00489695	0.281256	1	protein_coding		100689847	I3JP34	GO:0008270;GO:0003676	zinc ion binding;nucleic acid binding	molecular_function			GO:0003674;GO:0043167	molecular_function;ion binding
ENSONIG00000009669	insulin-like growth factor-binding protein 3	IGFBP3 (1 of many)	1.37545	2.88834	-2.08667	-1.0612	1.10929	7.9343	0.00485063	0.281256	1	protein_coding		102082028	I3JTF1	GO:0005520;GO:0005576	insulin-like growth factor binding;extracellular region	molecular_function;cellular_component	PTHR11551_SF3	INSULIN GROWTH FACTOR BINDING 3 PRECURSOR IBP 3 IGF BINDING 3 IGFBP 3	GO:0005575;GO:0005576;GO:0003674	cellular_component;extracellular region;molecular_function
ENSONIG00000010377	von Willebrand factor C domain containing 2	vwc2	29.2659	23.5416	1.24253	0.313282	4.72723	7.96433	0.00477081	0.281256	1	protein_coding	ZDB-GENE-090313-315	100705038	I3JVZ7	GO:0005515;GO:0007399;GO:0030900	protein binding;nervous system development;forebrain development	molecular_function;biological_process	PTHR11339_SF258	VON WILLEBRAND FACTOR C DOMAIN CONTAINING 2	GO:0003674;GO:0048856	molecular_function;anatomical structure development
ENSONIG00000010711	cytosolic iron-sulfur assembly component 1	ciao1	49.3304	39.5512	1.2487	0.320431	5.45796	7.92242	0.0048826	0.281256	1	protein_coding	ZDB-GENE-040426-839	100712103	I3JX71	GO:0005515;GO:0016226;GO:0097361	protein binding;iron-sulfur cluster assembly;CIA complex	molecular_function;biological_process;cellular_component	PTHR19920	PROBABLE CYTOSOLIC IRON SULFUR ASSEMBLY	GO:0003674;GO:0006790;GO:0022607;GO:0051186;GO:0032991;GO:0005575	molecular_function;sulfur compound metabolic process;cellular component assembly;cofactor metabolic process;protein-containing complex;cellular_component
ENSONIG00000011519	PAT1 homolog 2	patl2	0.54702	1.57602	-2.81209	-1.49164	0.324799	7.94661	0.00481775	0.281256	1	protein_coding	ZDB-GENE-121214-350	100712509	I3K055	GO:0000290	deadenylation-dependent decapping of nuclear-transcribed mRNA	biological_process	PTHR21551	PAT1 HOMOLOG 1 PAT1 1 PAT1 HOMOLOG B PAT1B	GO:0009056;GO:0034641;GO:0034655	catabolic process;cellular nitrogen compound metabolic process;nucleobase-containing compound catabolic process
ENSONIG00000013840	synaptogyrin 1	syngr1b	101.353	83.1163	1.21892	0.2856	6.59098	7.92361	0.00487939	0.281256	1	protein_coding	ZDB-GENE-090624-2	102082341	I3K8F8	GO:0016020;GO:0016021	membrane;integral component of membrane	cellular_component	PTHR10838	SYNAPTOGYRIN	GO:0005575	cellular_component
ENSONIG00000019136			53.8803	67.4854	-1.25204	-0.324286	5.90555	7.96307	0.00477414	0.281256	1	protein_coding				GO:0001518;GO:0006814;GO:0005216;GO:0006811;GO:0055085;GO:0005509;GO:0016020;GO:0005515;GO:0005248;GO:0016021;GO:0005244;GO:0034220;GO:0034765;GO:0005886;GO:0005272;GO:0035725	voltage-gated sodium channel complex;sodium ion transport;ion channel activity;ion transport;transmembrane transport;calcium ion binding;membrane;protein binding;voltage-gated sodium channel activity;integral component of membrane;voltage-gated ion channel activity;ion transmembrane transport;regulation of ion transmembrane transport;plasma membrane;sodium channel activity;sodium ion transmembran…	cellular_component;biological_process;molecular_function	PTHR10037_SF132	SODIUM CHANNEL TYPE 8 SUBUNIT ALPHA SODIUM CHANNEL TYPE VIII SUBUNIT ALPHA VOLTAGE GATED SODIUM CHANNEL SUBUNIT ALPHA NAV1 6	GO:0003674;GO:0005575;GO:0043167;GO:0006810;GO:0055085;GO:0022857;GO:0032991;GO:0005886	molecular_function;cellular_component;ion binding;transport;transmembrane transport;transmembrane transporter activity;protein-containing complex;plasma membrane
ENSONIG00000024767			1.31925	2.40064	-1.82225	-0.865723	0.808051	7.91977	0.00488974	0.281256	1	lincRNA
ENSONIG00000004982	collagen type IV alpha 6 chain	col4a6	13.8156	9.63353	1.43034	0.516358	3.54439	7.89281	0.00496316	0.282227	1	protein_coding	ZDB-GENE-101001-2	100694562	I3JBM9	GO:0005581;GO:0005201;GO:0048846;GO:0071711	collagen trimer;extracellular matrix structural constituent;axon extension involved in axon guidance;basement membrane organization	cellular_component;molecular_function;biological_process	PTHR24023_SF397	COLLAGEN ALPHA 2 IV CHAIN PRECURSOR	GO:0003674;GO:0005198;GO:0032991;GO:0005575;GO:0040007;GO:0030198	molecular_function;structural molecule activity;protein-containing complex;cellular_component;growth;extracellular matrix organization
ENSONIG00000009534	polycomb protein suz12-B	suz12a	173.173	221.607	-1.27966	-0.355756	7.61654	7.88269	0.00499103	0.282227	1	protein_coding	ZDB-GENE-040801-36	100701898	I3JSY5				PTHR22597	POLYCOMB SUZ12 SUPPRESSOR OF ZESTE 12 HOMOLOG
ENSONIG00000014915	lactamase beta 2	LACTB2	18.2517	13.3451	1.37166	0.455922	4.05957	7.87598	0.00500956	0.282227	1	protein_coding		100690561	I3KCD2				PTHR23131	LACTAMASE
ENSONIG00000015584	sirtuin 3	sirt3	18.3038	13.7851	1.32571	0.406761	4.03441	7.88292	0.00499038	0.282227	1	protein_coding	ZDB-GENE-070112-1762			GO:0008270;GO:0070403;GO:0017136;GO:0016787;GO:0046872;GO:0016575	zinc ion binding;NAD+ binding;NAD-dependent histone deacetylase activity;hydrolase activity;metal ion binding;histone deacetylation	molecular_function;biological_process	PTHR11085_SF14	NAD DEPENDENT DEACETYLASE SIRTUIN 3 PRECURSOR EC_3.5.1.- REGULATORY SIR2 HOMOLOG 3 SIR2 3	GO:0003674;GO:0043167;GO:0016810;GO:0006464	molecular_function;ion binding;hydrolase activity, acting on carbon-nitrogen (but not peptide) bonds;cellular protein modification process
ENSONIG00000018070	Oreochromis niloticus sialidase-3-like (neu3e), mRNA.	neu3e	21.2463	16.3659	1.29691	0.375081	4.30373	7.89742	0.00495053	0.282227	2	protein_coding		100690294	I3KNS4;I3KNS3	GO:0004308	exo-alpha-sialidase activity	molecular_function	PTHR10628	SIALIDASE EC_3.2.1.18 SIALIDASE N ACETYL ALPHA NEURAMINIDASE	GO:0016798	hydrolase activity, acting on glycosyl bonds	00600+3.2.1.18;00511+3.2.1.18
ENSONIG00000024486			1.12509	2.36382	-2.10761	-1.07561	0.825099	7.88034	0.00499752	0.282227	1	lincRNA
ENSONIG00000001722			11.9303	16.3119	-1.37165	-0.455908	3.73319	7.83655	0.00512002	0.28277	1	protein_coding				GO:0034993;GO:0005635;GO:0090286;GO:0051015;GO:0016021;GO:0005515;GO:0016020;GO:0003779	meiotic nuclear membrane microtubule tethering complex;nuclear envelope;cytoskeletal anchoring at nuclear membrane;actin filament binding;integral component of membrane;protein binding;membrane;actin binding	cellular_component;biological_process;molecular_function	PTHR11915_SF264	NESPRIN 2 KASH DOMAIN CONTAINING 2 KASH2 NUCLEAR ENVELOPE SPECTRIN REPEAT 2 NUCLEUS AND ACTIN CONNECTING ELEMENT PROTEIN NUANCE SYNAPTIC NUCLEAR ENVELOPE 2 SYNE 2	GO:0003674;GO:0005575;GO:0008092;GO:0007010;GO:0005635;GO:0032991	molecular_function;cellular_component;cytoskeletal protein binding;cytoskeleton organization;nuclear envelope;protein-containing complex
ENSONIG00000002182	tetratricopeptide repeat domain 34	ttc34	2.02096	0.72609	2.74602	1.45734	0.664746	7.84907	0.00508469	0.28277	1	protein_coding	ZDB-GENE-140106-266			GO:0005515	protein binding	molecular_function	PTHR23083_SF341	TETRATRICOPEPTIDE REPEAT 34 TPR REPEAT 34	GO:0003674	molecular_function
ENSONIG00000004681	angiopoietin-2	angpt2b	1.99419	0.635933	3.08218	1.62395	0.599986	7.84175	0.00510531	0.28277	2	protein_coding	ZDB-GENE-010817-2	100709172	I3JAK3;I3JAK4	GO:0016020;GO:0016021;GO:0001568;GO:0001944	membrane;integral component of membrane;blood vessel development;vasculature development	cellular_component;biological_process	PTHR19143_SF195	ANGIOPOIETIN 2	GO:0005575;GO:0048856	cellular_component;anatomical structure development
ENSONIG00000008812			30.1998	37.4421	-1.24013	-0.310487	5.04325	7.82702	0.00514708	0.28277	1	protein_coding				GO:0006468;GO:0004672;GO:0005524	protein phosphorylation;protein kinase activity;ATP binding	biological_process;molecular_function	PTHR24055_SF102	SRSF KINASE 2 EC_2.7.11.1 SFRS KINASE 2 SERINE/ARGININE RICH SPECIFIC KINASE 2 SR SPECIFIC KINASE 2 [CONTAINS SRSF KINASE 2 N TERMINAL; SRSF KINASE 2 C TERMINAL]	GO:0003674;GO:0043167;GO:0016301;GO:0006464	molecular_function;ion binding;kinase activity;cellular protein modification process
ENSONIG00000013506	zgc:110591	zgc:110591	4.67323	2.59339	1.80636	0.853084	1.94074	7.86406	0.0050427	0.28277	1	protein_coding	ZDB-GENE-050522-510			GO:0016020;GO:0016021	membrane;integral component of membrane	cellular_component	PTHR31056	TRANSMEMBRANE 179B	GO:0005575	cellular_component
ENSONIG00000018893	ral guanine nucleotide dissociation stimulator-like 3a	rgl3a	24.8184	31.655	-1.27844	-0.354385	4.84196	7.83079	0.00513636	0.28277	1	protein_coding	ZDB-GENE-101130-1			GO:0005085;GO:0007264;GO:0043547;GO:0005622;GO:0007165;GO:0008321	guanyl-nucleotide exchange factor activity;small GTPase mediated signal transduction;positive regulation of GTPase activity;intracellular;signal transduction;Ral guanyl-nucleotide exchange factor activity	molecular_function;biological_process;cellular_component	PTHR23113_SF156	RAL GUANINE NUCLEOTIDE DISSOCIATION STIMULATOR	GO:0007165;GO:0005575;GO:0005622;GO:0003674	signal transduction;cellular_component;intracellular;molecular_function
ENSONIG00000023309			4.04723	2.19673	1.85303	0.889884	1.64832	7.84769	0.00508856	0.28277	1	lincRNA
ENSONIG00000024407			0.262584	0.800268	-2.99112	-1.58069	-0.440419	7.85296	0.00507375	0.28277	2	lincRNA
ENSONIG00000005914	zinc finger homeobox 3	zfhx3	76.6118	100.435	-1.31196	-0.391724	6.46611	7.81015	0.00519537	0.283531	3	protein_coding	ZDB-GENE-030131-7577			GO:0008270;GO:0043565;GO:0003676;GO:0006355;GO:0003677;GO:0005634;GO:0046872	zinc ion binding;sequence-specific DNA binding;nucleic acid binding;regulation of transcription, DNA-templated;DNA binding;nucleus;metal ion binding	molecular_function;biological_process;cellular_component	PTHR24208_SF84	ZINC FINGER HOMEOBOX 3 AT MOTIF BINDING FACTOR 1 AT BINDING TRANSCRIPTION FACTOR 1 ALPHA FETOPROTEIN ENHANCER BINDING ZINC FINGER HOMEODOMAIN 3 ZFH 3	GO:0003674;GO:0003677;GO:0043167;GO:0005575;GO:0043226;GO:0005634	molecular_function;DNA binding;ion binding;cellular_component;organelle;nucleus
ENSONIG00000008285	ATP binding cassette subfamily C member 5	ABCC5	2.06364	7.47227	-3.61288	-1.85315	2.85682	7.79985	0.00522505	0.283531	1	protein_coding				GO:0042626;GO:0016887;GO:0055085;GO:0016021;GO:0005524;GO:0008514;GO:0015711;GO:0016020;GO:0000166	ATPase activity, coupled to transmembrane movement of substances;ATPase activity;transmembrane transport;integral component of membrane;ATP binding;organic anion transmembrane transporter activity;organic anion transport;membrane;nucleotide binding	molecular_function;biological_process;cellular_component	PTHR24223_SF196	MULTIDRUG RESISTANCE ASSOCIATED 5 ATP BINDING CASSETTE SUB FAMILY C MEMBER 5 MULTI SPECIFIC ORGANIC ANION TRANSPORTER C MOAT C SMRP	GO:0003674;GO:0043167;GO:0005575;GO:0006810;GO:0055085;GO:0016887;GO:0022857	molecular_function;ion binding;cellular_component;transport;transmembrane transport;ATPase activity;transmembrane transporter activity
ENSONIG00000014693	melanocortin 2 receptor accessory protein 2	mrap2b	28.0922	22.3991	1.25644	0.329345	4.67278	7.80536	0.00520913	0.283531	2	protein_coding	ZDB-GENE-100729-5	100701687	I3KBK1;I3KBK0	GO:0010469;GO:0016020;GO:0016021;GO:0030545;GO:0031782;GO:0006112;GO:0042594;GO:0051641;GO:0097009;GO:0106071;GO:0005737;GO:0005783;GO:0005794;GO:0048471	regulation of signaling receptor activity;membrane;integral component of membrane;receptor regulator activity;type 4 melanocortin receptor binding;energy reserve metabolic process;response to starvation;cellular localization;energy homeostasis;positive regulation of adenylate cyclase-activating G protein-coupled receptor signaling pathway;cytoplasm;endoplasmic reticulum;Golgi apparatus;perinuclea…	biological_process;cellular_component;molecular_function	TF646186	MELANOCORTIN 2 RECEPTOR ACCESSORY 2B ZMRAP2B	GO:0008150;GO:0005575;GO:0003674;GO:0006091;GO:0006950;GO:0042592;GO:0005737;GO:0043226;GO:0005783;GO:0005794	biological_process;cellular_component;molecular_function;generation of precursor metabolites and energy;response to stress;homeostatic process;cytoplasm;organelle;endoplasmic reticulum;Golgi apparatus
ENSONIG00000025607			5.74036	3.35148	1.71805	0.780769	2.21238	7.81447	0.00518296	0.283531	2	lincRNA
ENSONIG00000005990	non-SMC condensin II complex subunit G2	ncapg2	2.34076	4.93973	-2.10054	-1.07076	1.96443	7.78032	0.00528185	0.284851	2	protein_coding	ZDB-GENE-070410-100	100692952	I3JFA3;I3JFA2	GO:0005634	nucleus	cellular_component	PTHR16199	CONDENSIN 2 COMPLEX SUBUNIT G2 CHROMOSOME ASSOCIATED G2 CAP G2 LEUCINE ZIPPER 5 NON SMC CONDENSIN II COMPLEX SUBUNIT G2	GO:0005575;GO:0043226;GO:0005634	cellular_component;organelle;nucleus
ENSONIG00000007106	LIM domain binding 3a	ldb3a	1.79733	3.31336	-1.83953	-0.879337	1.34566	7.77622	0.00529384	0.284851	1	protein_coding	ZDB-GENE-040121-6			GO:0005515;GO:0046872;GO:0001756;GO:0007507;GO:0007519;GO:0007626	protein binding;metal ion binding;somitogenesis;heart development;skeletal muscle tissue development;locomotory behavior	molecular_function;biological_process	PTHR24214_SF9	LIM DOMAIN BINDING 3 CYPHER Z BAND ALTERNATIVELY SPLICED PDZ MOTIF	GO:0003674;GO:0043167;GO:0048646;GO:0048856	molecular_function;ion binding;anatomical structure formation involved in morphogenesis;anatomical structure development
ENSONIG00000011380	arrestin domain-containing protein 3	arrdc3b	2.92964	9.5459	-3.2645	-1.70686	2.49503	7.77122	0.00530853	0.284851	2	protein_coding	ZDB-GENE-040912-182	100706525	I3JZM9;I3JZM8				PTHR11188_SF49	ARRESTIN DOMAIN CONTAINING 3
ENSONIG00000019923	DNA topoisomerase II alpha	top2a	4.55906	2.33662	1.93688	0.953738	1.82723	7.76943	0.00531378	0.284851	2	protein_coding	ZDB-GENE-030131-2453	100691156	I3KVE8;I3KVE9	GO:0006259;GO:0005524;GO:0003677;GO:0006265;GO:0003918;GO:0000166;GO:0016853;GO:0003916;GO:0061505;GO:0007059;GO:0031100	DNA metabolic process;ATP binding;DNA binding;DNA topological change;DNA topoisomerase type II (ATP-hydrolyzing) activity;nucleotide binding;isomerase activity;DNA topoisomerase activity;DNA topoisomerase II activity;chromosome segregation;animal organ regeneration	biological_process;molecular_function	PTHR10169_SF33	DNA TOPOISOMERASE 2 ALPHA EC_5.99.1.3 DNA TOPOISOMERASE II ALPHA ISOZYME	GO:0003674;GO:0003677;GO:0043167;GO:0006259;GO:0034641;GO:0051276;GO:0016853;GO:0016887;GO:0007059;GO:0048856	molecular_function;DNA binding;ion binding;DNA metabolic process;cellular nitrogen compound metabolic process;chromosome organization;isomerase activity;ATPase activity;chromosome segregation;anatomical structure development
ENSONIG00000021392			2.25237	4.36242	-1.95347	-0.966042	1.52131	7.75751	0.00534898	0.285408	1	protein_coding				GO:0005515;GO:0005975;GO:0005977	protein binding;carbohydrate metabolic process;glycogen metabolic process	molecular_function;biological_process	PTHR12307_SF7	PHOSPHATASE 1 REGULATORY SUBUNIT 3E	GO:0003674;GO:0005975;GO:0006091	molecular_function;carbohydrate metabolic process;generation of precursor metabolites and energy
ENSONIG00000023532			0.734166	1.67675	-2.25245	-1.17149	0.409088	7.75499	0.00535643	0.285408	1	lincRNA
ENSONIG00000025743			0.473184	1.10702	-2.29581	-1.19901	-0.280114	7.73229	0.00542419	0.28815	1	lincRNA
ENSONIG00000018490			54.8439	44.6938	1.22666	0.294731	5.67788	7.71901	0.00546425	0.289409	1	protein_coding			I3KQ83	GO:0016020;GO:0016021	membrane;integral component of membrane	cellular_component	PTHR31815	TRANSMEMBRANE TRANSMEMBRANE TTMA TWO TRANSMEMBRANE DOMAIN CONTAINING FAMILY MEMBER	GO:0005575	cellular_component
ENSONIG00000009369			26.9608	34.6204	-1.28318	-0.35972	4.83662	7.69629	0.00553343	0.291351	1	protein_coding			I3JSC7	GO:0016021;GO:0016020	integral component of membrane;membrane	cellular_component	PTHR14948_SF20	PROLINE RICH TRANSMEMBRANE 2 DISPANIN SUBFAMILY B MEMBER 3 DSPB3	GO:0005575	cellular_component
ENSONIG00000016343	basement membrane-specific heparan sulfate proteoglycan core protein		2.43138	1.14309	2.10642	1.07479	0.946533	7.69615	0.00553387	0.291351	1	protein_coding		100711310	I3KHI2				PTHR10489_SF510	TURTLE
ENSONIG00000026071			58.4236	82.829	-1.41837	-0.504239	6.03002	7.69079	0.00555032	0.291351	2	lincRNA
ENSONIG00000000371	solute carrier family 6 member 6	SLC6A6 (1 of many)	159.341	198.292	-1.2448	-0.315919	7.42389	7.6572	0.00565463	0.294469	1	protein_coding				GO:0005328;GO:0006836;GO:0005369;GO:0005887;GO:0016021;GO:0016020;GO:0055085;GO:0015293	neurotransmitter:sodium symporter activity;neurotransmitter transport;taurine:sodium symporter activity;integral component of plasma membrane;integral component of membrane;membrane;transmembrane transport;symporter activity	molecular_function;biological_process;cellular_component	PTHR11616_SF116	SODIUM AND CHLORIDE DEPENDENT TAURINE TRANSPORTER SOLUTE CARRIER FAMILY 6 MEMBER 6	GO:0005575;GO:0022857;GO:0003674;GO:0006810;GO:0055085	cellular_component;transmembrane transporter activity;molecular_function;transport;transmembrane transport
ENSONIG00000008542	cathepsin D		150.307	119.04	1.26336	0.337267	7.10884	7.65806	0.00565191	0.294469	1	protein_coding		100700357	I3JPE6	GO:0004190;GO:0006508;GO:0005764;GO:0008233;GO:0016787	aspartic-type endopeptidase activity;proteolysis;lysosome;peptidase activity;hydrolase activity	molecular_function;biological_process;cellular_component	PTHR13683_SF230	CATHEPSIN D PRECURSOR EC_3.4.23.5	GO:0008233;GO:0005575;GO:0005773;GO:0043226;GO:0005764	peptidase activity;cellular_component;vacuole;organelle;lysosome
ENSONIG00000013855			0.657306	0.242449	2.73901	1.45366	-0.494131	7.65559	0.00565967	0.294469	1	protein_coding
ENSONIG00000008080			26.4161	34.494	-1.3059	-0.385044	4.92312	7.64251	0.00570084	0.295742	3	protein_coding				GO:0004999;GO:0004888;GO:0007166;GO:0016021;GO:0007186;GO:0004930;GO:0016020;GO:0007165;GO:0003824	vasoactive intestinal polypeptide receptor activity;transmembrane signaling receptor activity;cell surface receptor signaling pathway;integral component of membrane;G protein-coupled receptor signaling pathway;G protein-coupled receptor activity;membrane;signal transduction;catalytic activity	molecular_function;biological_process;cellular_component	PTHR12011_SF27;PTHR22754	VASOACTIVE INTESTINAL POLYPEPTIDE RECEPTOR 2 PRECURSOR VIP R 2 PITUITARY ADENYLATE CYCLASE ACTIVATING POLYPEPTIDE TYPE III RECEPTOR PACAP TYPE III RECEPTOR PACAP R 3 PACAP R3;DISCO INTERACTING 2 HOMOLOG DIP2 HOMOLOG	GO:0005575;GO:0003674;GO:0007165	cellular_component;molecular_function;signal transduction
ENSONIG00000015795	protein turtle homolog B	igsf9bb	16.6858	27.6154	-1.65981	-0.731022	4.48578	7.63495	0.00572479	0.296115	1	protein_coding	ZDB-GENE-091112-15	100706295	I3KFI9	GO:0005515;GO:0016020;GO:0016021	protein binding;membrane;integral component of membrane	molecular_function;cellular_component	PTHR10489_SF575	TURTLE HOMOLOG B PRECURSOR IMMUNOGLOBULIN SUPERFAMILY MEMBER 9B	GO:0003674;GO:0005575	molecular_function;cellular_component
ENSONIG00000001063	dihydropyrimidinase-related protein 5	dpysl5a	154.386	121.901	1.26594	0.340211	7.20736	7.62442	0.00575833	0.296119	1	protein_coding	ZDB-GENE-030131-3136	100703967	I3IXK8	GO:0007399;GO:0007411;GO:0008017;GO:0016810;GO:0005737;GO:0016787	nervous system development;axon guidance;microtubule binding;hydrolase activity, acting on carbon-nitrogen (but not peptide) bonds;cytoplasm;hydrolase activity	biological_process;molecular_function;cellular_component	PTHR11647	DIHYDROPYRIMIDINASE RELATED DRP	GO:0005575;GO:0005737;GO:0016810;GO:0003674;GO:0008092;GO:0048856	cellular_component;cytoplasm;hydrolase activity, acting on carbon-nitrogen (but not peptide) bonds;molecular_function;cytoskeletal protein binding;anatomical structure development
ENSONIG00000007041	D site albumin promoter binding protein a	dbpa	22.9242	29.2365	-1.27576	-0.351358	4.66809	7.62867	0.00574476	0.296119	3	protein_coding	ZDB-GENE-060503-802			GO:0006357;GO:0003700;GO:0006355	regulation of transcription by RNA polymerase II;DNA-binding transcription factor activity;regulation of transcription, DNA-templated	biological_process;molecular_function	PTHR11988_SF29	D SITE OF ALBUMIN PROMOTER ALBUMIN D BOX BINDING FRAGMENT	GO:0003674;GO:0003700	molecular_function;DNA-binding transcription factor activity
ENSONIG00000012142			6.87645	4.05666	1.68502	0.752767	2.40237	7.61791	0.00577915	0.296328	1	protein_coding				GO:0005328;GO:0016021;GO:0016020;GO:0055085;GO:0015293;GO:0006836	neurotransmitter:sodium symporter activity;integral component of membrane;membrane;transmembrane transport;symporter activity;neurotransmitter transport	molecular_function;cellular_component;biological_process	PTHR11616_SF81	TRANSPORTER	GO:0005575;GO:0022857;GO:0003674;GO:0006810;GO:0055085	cellular_component;transmembrane transporter activity;molecular_function;transport;transmembrane transport
ENSONIG00000003229	forkhead box K1	foxk1	32.3442	41.9188	-1.29783	-0.3761	5.16444	7.59862	0.00584129	0.297116	1	protein_coding	ZDB-GENE-030131-6402			GO:0043565;GO:0003700;GO:0006355;GO:0005515;GO:0003677;GO:0005634	sequence-specific DNA binding;DNA-binding transcription factor activity;regulation of transcription, DNA-templated;protein binding;DNA binding;nucleus	molecular_function;biological_process;cellular_component	PTHR11829_SF107	FORKHEAD BOX K1 MYOCYTE NUCLEAR FACTOR MNF	GO:0003674;GO:0003700;GO:0003677;GO:0005575;GO:0043226;GO:0005634	molecular_function;DNA-binding transcription factor activity;DNA binding;cellular_component;organelle;nucleus
ENSONIG00000007578	SVOP-like	svopl	1.10443	0.499697	2.23507	1.16032	0.19755	7.59807	0.00584309	0.297116	1	protein_coding	ZDB-GENE-041114-109			GO:0055085;GO:0016021;GO:0016020	transmembrane transport;integral component of membrane;membrane	biological_process;cellular_component	PTHR24064_SF175	TRANSPORTER SVOPL SVOP	GO:0005575;GO:0006810;GO:0055085	cellular_component;transport;transmembrane transport
ENSONIG00000009791	mediator complex subunit 25	med25	11.8294	26.8497	-2.27079	-1.18319	4.19715	7.58745	0.00587761	0.297116	2	protein_coding	ZDB-GENE-040426-2850	100690539	I3JTV5;I3JTV4				PTHR12433_SF10	MEDIATOR OF RNA POLYMERASE II TRANSCRIPTION SUBUNIT 25 MEDIATOR COMPLEX SUBUNIT 25
ENSONIG00000012603	LIM domain transcription factor LMO4.1	lmo4a	47.7001	38.6108	1.23753	0.307465	5.52211	7.58717	0.0058785	0.297116	1	protein_coding	ZDB-GENE-010702-1	100706721	I3K418	GO:0046872;GO:0030900;GO:0031076	metal ion binding;forebrain development;embryonic camera-type eye development	molecular_function;biological_process	PTHR24208_SF82	LIM DOMAIN TRANSCRIPTION FACTOR LMO4 1 LIM DOMAIN ONLY 4 1 LMO 4 1	GO:0003674;GO:0043167;GO:0048856	molecular_function;ion binding;anatomical structure development
ENSONIG00000012940	sideroflexin 1	sfxn1	34.8841	28.0397	1.24424	0.315263	5.05681	7.5891	0.00587224	0.297116	1	protein_coding	ZDB-GENE-040801-45	100705454	I3K583	GO:0015075;GO:0006811;GO:0055085;GO:0016020;GO:0016021;GO:0034220;GO:0005739;GO:0031966	ion transmembrane transporter activity;ion transport;transmembrane transport;membrane;integral component of membrane;ion transmembrane transport;mitochondrion;mitochondrial membrane	molecular_function;biological_process;cellular_component	PTHR11153	SIDEROFLEXIN	GO:0005575;GO:0006810;GO:0055085;GO:0022857;GO:0003674;GO:0043226;GO:0005739	cellular_component;transport;transmembrane transport;transmembrane transporter activity;molecular_function;organelle;mitochondrion
ENSONIG00000008231	diamine acetyltransferase 1	sat1b	112.143	91.6309	1.22435	0.292012	6.64719	7.58118	0.00589809	0.297257	1	protein_coding	ZDB-GENE-041001-39	100710353	I3JNB8	GO:0005515;GO:0004145	protein binding;diamine N-acetyltransferase activity	molecular_function	PTHR10545	DIAMINE ACETYLTRANSFERASE 1 EC_2.3.1.57 POLYAMINE N ACETYLTRANSFERASE 1 PUTRESCINE ACETYLTRANSFERASE SPERMIDINE/SPERMINE N 1 ACETYLTRANSFERASE 1 SSAT SSAT 1	GO:0003674;GO:0016746	molecular_function;transferase activity, transferring acyl groups	00330+2.3.1.57
ENSONIG00000004468	dedicator of cytokinesis 3	dock3	94.6333	125.69	-1.3292	-0.410558	6.67628	7.55305	0.00599085	0.297974	1	protein_coding	ZDB-GENE-100624-1			GO:0005085;GO:0007264;GO:0005515	guanyl-nucleotide exchange factor activity;small GTPase mediated signal transduction;protein binding	molecular_function;biological_process	PTHR23317_SF66	DEDICATOR OF CYTOKINESIS 3 MODIFIER OF CELL ADHESION PRESENILIN BINDING PBP	GO:0003674;GO:0007165	molecular_function;signal transduction
ENSONIG00000009257	NACHT and WD repeat domain containing 2	nwd2	45.1232	59.0177	-1.30825	-0.387635	5.7542	7.56852	0.00593966	0.297974	1	protein_coding	ZDB-GENE-161213-1	100696460	I3JRZ6	GO:0005515	protein binding	molecular_function	PTHR19857	ANGIO ASSOCIATED MIGRATORY CELL	GO:0003674	molecular_function
ENSONIG00000013332			105.881	136.921	-1.29338	-0.371152	6.91456	7.54771	0.00600865	0.297974	1	protein_coding				GO:0034993;GO:0005635;GO:0090286;GO:0051015;GO:0016021;GO:0005515;GO:0016020;GO:0003779	meiotic nuclear membrane microtubule tethering complex;nuclear envelope;cytoskeletal anchoring at nuclear membrane;actin filament binding;integral component of membrane;protein binding;membrane;actin binding	cellular_component;biological_process;molecular_function	PTHR11915_SF267	NESPRIN 1 ENAPTIN KASH DOMAIN CONTAINING 1 KASH1 MYOCYTE NUCLEAR ENVELOPE 1 MYNE 1 NUCLEAR ENVELOPE SPECTRIN REPEAT 1 SYNAPTIC NUCLEAR ENVELOPE 1 SYNE 1	GO:0003674;GO:0005575;GO:0008092;GO:0007010;GO:0005635;GO:0032991	molecular_function;cellular_component;cytoskeletal protein binding;cytoskeleton organization;nuclear envelope;protein-containing complex
ENSONIG00000013532			91.3613	70.705	1.2927	0.37039	6.20071	7.54629	0.00601338	0.297974	1	protein_coding
ENSONIG00000014739			54.2031	118.635	-2.18856	-1.12998	6.84926	7.56613	0.00594754	0.297974	2	protein_coding							PTHR11034	N MYC DOWNSTREAM REGULATED GENE
ENSONIG00000015782	GUF1 homolog, GTPase	guf1	16.9764	12.4494	1.36821	0.452291	3.93103	7.553	0.00599101	0.297974	1	protein_coding	ZDB-GENE-030131-4289		I3KFH1	GO:0003924;GO:0005525;GO:0016020;GO:0000166;GO:0016787;GO:0006412;GO:0005739;GO:0005743;GO:0043022;GO:0005759;GO:0045727	GTPase activity;GTP binding;membrane;nucleotide binding;hydrolase activity;translation;mitochondrion;mitochondrial inner membrane;ribosome binding;mitochondrial matrix;positive regulation of translation	molecular_function;cellular_component;biological_process	PTHR23115_SF97	TRANSLATION FACTOR GUF1 MITOCHONDRIAL EC_3.6.5.- ELONGATION FACTOR 4 HOMOLOG EF 4 GTPASE GUF1 RIBOSOMAL BACK TRANSLOCASE	GO:0003674;GO:0043167;GO:0003924;GO:0005575;GO:0009058;GO:0034641;GO:0006412;GO:0043226;GO:0005739	molecular_function;ion binding;GTPase activity;cellular_component;biosynthetic process;cellular nitrogen compound metabolic process;translation;organelle;mitochondrion
ENSONIG00000018235	myosin, heavy chain 10, non-muscle	myh10	67.3796	84.136	-1.25003	-0.321967	6.27103	7.52595	0.00608165	0.30018	2	protein_coding	ZDB-GENE-030616-162			GO:0016459;GO:0003774;GO:0051015;GO:0005524;GO:0005515;GO:0000166;GO:0003779	myosin complex;motor activity;actin filament binding;ATP binding;protein binding;nucleotide binding;actin binding	cellular_component;molecular_function	PTHR13140_SF328	MYOSIN 10 CELLULAR MYOSIN HEAVY CHAIN TYPE B MYOSIN HEAVY CHAIN 10 MYOSIN HEAVY CHAIN NON MUSCLE IIB NON MUSCLE MYOSIN HEAVY CHAIN B NMMHC B NON MUSCLE MYOSIN HEAVY CHAIN IIB NMMHC II B NMMHC IIB	GO:0003674;GO:0043167;GO:0008092;GO:0032991;GO:0005575;GO:0043226;GO:0005856	molecular_function;ion binding;cytoskeletal protein binding;protein-containing complex;cellular_component;organelle;cytoskeleton
ENSONIG00000019550	matrilin 3b	matn3b	9.92419	16.3316	-1.65112	-0.723441	3.70677	7.52294	0.00609183	0.30018	1	protein_coding	ZDB-GENE-050221-9			GO:0005509	calcium ion binding	molecular_function	PTHR22992_SF15	MATRILIN 3 PRECURSOR	GO:0003674;GO:0043167	molecular_function;ion binding
ENSONIG00000022908			0.457858	1.21338	-2.72328	-1.44534	0.220971	7.49556	0.00618514	0.303931	1	lincRNA
ENSONIG00000011011	leucine rich repeat LGI family member 3	lgi3	184.791	231.073	-1.25088	-0.322945	7.7168	7.48831	0.0062101	0.304312	1	protein_coding	ZDB-GENE-060217-4	100700097	I3JYB0	GO:0005515	protein binding	molecular_function	PTHR24367_SF10	LEUCINE RICH REPEAT LGI FAMILY MEMBER 3 PRECURSOR LEUCINE RICH GLIOMA INACTIVATED 3	GO:0003674	molecular_function
ENSONIG00000010477	phosphoinositide-3-kinase, regulatory subunit 2 (beta)	pik3r2	49.2048	66.8375	-1.35871	-0.442242	5.8131	7.48089	0.00623573	0.304724	1	protein_coding	ZDB-GENE-040309-1			GO:0005942;GO:0035014;GO:0007165;GO:0005515;GO:0043551	phosphatidylinositol 3-kinase complex;phosphatidylinositol 3-kinase regulator activity;signal transduction;protein binding;regulation of phosphatidylinositol 3-kinase activity	cellular_component;molecular_function;biological_process	PTHR10155_SF1	PHOSPHATIDYLINOSITOL 3 KINASE REGULATORY SUBUNIT BETA PI3 KINASE REGULATORY SUBUNIT BETA PI3K REGULATORY SUBUNIT BETA PTDINS 3 KINASE REGULATORY SUBUNIT BETA PHOSPHATIDYLINOSITOL 3 KINASE 85 KDA REGULATORY SUBUNIT BETA PI3 KINASE SUBUNIT P85 BETA PTDINS 3 KINASE REGULATORY SUBUNIT P85 BETA	GO:0003674;GO:0007165;GO:0030234;GO:0032991;GO:0005575	molecular_function;signal transduction;enzyme regulator activity;protein-containing complex;cellular_component
ENSONIG00000023870			4.2665	2.51953	1.69778	0.763648	1.81793	7.47524	0.00625531	0.304839	1	lincRNA
ENSONIG00000022558			4.41646	2.29986	1.92057	0.941537	1.61762	7.46894	0.00627725	0.305067	1	lincRNA
ENSONIG00000006089	tyrosine-protein kinase yes	YES1	19.0263	14.493	1.31161	0.39134	4.16202	7.4526	0.00633447	0.30527	1	protein_coding		100709943	I3JFN1	GO:0004713;GO:0006468;GO:0004672;GO:0005524;GO:0005515;GO:0016740;GO:0000166;GO:0016301;GO:0016310;GO:0004715;GO:0018108	protein tyrosine kinase activity;protein phosphorylation;protein kinase activity;ATP binding;protein binding;transferase activity;nucleotide binding;kinase activity;phosphorylation;non-membrane spanning protein tyrosine kinase activity;peptidyl-tyrosine phosphorylation	molecular_function;biological_process	PTHR24418_SF90	TYROSINE KINASE YES EC_2.7.10.2 P61 YES	GO:0003674;GO:0043167;GO:0016301;GO:0006464	molecular_function;ion binding;kinase activity;cellular protein modification process	04660+2.7.10.2
ENSONIG00000009388	ataxin 2-like	atxn2l	26.0582	33.0895	-1.27163	-0.346675	4.81321	7.43911	0.00638216	0.30527	2	protein_coding	ZDB-GENE-030131-3246						PTHR12854_SF8	ATAXIN 2
ENSONIG00000011555	DENN/MADD domain containing 1A	dennd1a	52.9057	67.0125	-1.26656	-0.340916	5.93153	7.45236	0.00633534	0.30527	3	protein_coding	ZDB-GENE-060404-6			GO:0017112	Rab guanyl-nucleotide exchange factor activity	molecular_function	PTHR13196_SF22	DENN DOMAIN CONTAINING 1A CONNECDENN	GO:0003674	molecular_function
ENSONIG00000015299	rabphilin-3A		9.96934	6.62566	1.50019	0.585143	3.10281	7.45351	0.00633129	0.30527	2	protein_coding		100712226	I3KDQ9;I3KDQ8	GO:0017137;GO:0006886;GO:0016020;GO:0005623;GO:0046872	Rab GTPase binding;intracellular protein transport;membrane;cell;metal ion binding	molecular_function;biological_process;cellular_component	PTHR10024_SF118	RABPHILIN 3A EXOPHILIN 1	GO:0005575;GO:0006810;GO:0005623;GO:0003674;GO:0043167	cellular_component;transport;cell;molecular_function;ion binding
ENSONIG00000017404	N-myc and STAT interactor	NMI	20.855	12.4705	1.66986	0.739729	4.16842	7.43831	0.00638497	0.30527	2	protein_coding		100699426	I3KLF4;I3KLF5	GO:0006366;GO:0003712;GO:0060333;GO:1903506	transcription by RNA polymerase II;transcription coregulator activity;interferon-gamma-mediated signaling pathway;regulation of nucleic acid-templated transcription	biological_process;molecular_function	PTHR15225	AMBIGUOUS	GO:0003674;GO:0009058;GO:0034641;GO:0007165	molecular_function;biosynthetic process;cellular nitrogen compound metabolic process;signal transduction
ENSONIG00000019688	homocysteine-responsive endoplasmic reticulum-resident ubiquitin-like domain member 2 protein	HERPUD2	65.9405	54.6496	1.20754	0.272075	5.91142	7.44042	0.00637751	0.30527	1	protein_coding		100704985	I3KUI5	GO:0005515;GO:0016020;GO:0016021	protein binding;membrane;integral component of membrane	molecular_function;cellular_component	PTHR12943	HOMOCYSTEINE RESPONSIVE ENDOPLASMIC RETICULUM RESIDENT UBIQUITIN DOMAIN MEMBER	GO:0003674;GO:0005575	molecular_function;cellular_component
ENSONIG00000010400			1.20283	0.392107	2.99554	1.58282	-0.153603	7.41725	0.00646015	0.306618	1	protein_coding							PTHR16165	NXPE FAMILY MEMBER
ENSONIG00000018319	TBC1 domain family member 32	tbc1d32	31.4472	41.0014	-1.30021	-0.37875	5.18942	7.41586	0.00646514	0.306618	2	protein_coding	ZDB-GENE-061106-5	100700232	I3KPM3;I3KPM2	GO:0035082;GO:0060271	axoneme assembly;cilium assembly	biological_process	PTHR13465	AMBIGUOUS	GO:0007010;GO:0022607	cytoskeleton organization;cellular component assembly
ENSONIG00000020149	kinesin family member 26Ab	kif26ab	50.1125	37.5316	1.33403	0.415789	5.4369	7.42202	0.00644304	0.306618	1	protein_coding	ZDB-GENE-100716-6			GO:0007018;GO:0008017;GO:0003777;GO:0005524;GO:0000166	microtubule-based movement;microtubule binding;microtubule motor activity;ATP binding;nucleotide binding	biological_process;molecular_function	PTHR24115_SF407	KINESIN KIF26A	GO:0003674;GO:0043167;GO:0008092	molecular_function;ion binding;cytoskeletal protein binding
ENSONIG00000003183	chromodomain helicase DNA binding protein 1-like	chd1l	12.2651	16.378	-1.33104	-0.412559	3.88757	7.39431	0.00654306	0.306786	2	protein_coding	ZDB-GENE-040426-892			GO:0006338;GO:0006281;GO:0005524;GO:0004003;GO:0032508;GO:0016020;GO:0016021	chromatin remodeling;DNA repair;ATP binding;ATP-dependent DNA helicase activity;DNA duplex unwinding;membrane;integral component of membrane	biological_process;molecular_function;cellular_component	PTHR10799_SF558	CHROMODOMAIN HELICASE DNA BINDING 1 EC_3.6.4.12	GO:0003674;GO:0043167;GO:0006259;GO:0006950;GO:0034641;GO:0016887;GO:0004386;GO:0051276;GO:0005575	molecular_function;ion binding;DNA metabolic process;response to stress;cellular nitrogen compound metabolic process;ATPase activity;helicase activity;chromosome organization;cellular_component
ENSONIG00000008347	CD9 antigen		198.627	149.763	1.32621	0.407305	7.5415	7.38616	0.00657276	0.306786	2	protein_coding		100694046	I3JNQ1;I3JNQ0	GO:0016021;GO:0016020	integral component of membrane;membrane	cellular_component	PTHR19282_SF163	CD9 ANTIGEN CD9 ANTIGEN	GO:0005575	cellular_component
ENSONIG00000009446	aquaporin-1	aqp1a.1	30.7411	19.5732	1.56968	0.650475	4.6351	7.39953	0.00652409	0.306786	1	protein_coding	ZDB-GENE-030131-7764	100692669	I3JSM5	GO:0015267;GO:0055085;GO:0016020;GO:0016021;GO:0072488;GO:0006833;GO:0005372;GO:0008519;GO:0015250;GO:0035379;GO:0015670;GO:0015696;GO:0035378;GO:0120029	channel activity;transmembrane transport;membrane;integral component of membrane;ammonium transmembrane transport;water transport;water transmembrane transporter activity;ammonium transmembrane transporter activity;water channel activity;carbon dioxide transmembrane transporter activity;carbon dioxide transport;ammonium transport;carbon dioxide transmembrane transport;proton export across plasma …	molecular_function;biological_process;cellular_component	PTHR19139_SF33	AQUAPORIN 1 AQP 1 AQUAPORIN CHIP WATER CHANNEL RED BLOOD CELLS AND KIDNEY PROXIMAL TUBULE	GO:0005575;GO:0006810;GO:0055085;GO:0022857;GO:0003674	cellular_component;transport;transmembrane transport;transmembrane transporter activity;molecular_function
ENSONIG00000009768	nucleobindin-2	nucb1	194.084	163.389	1.1882	0.24878	7.47155	7.39659	0.00653476	0.306786	1	protein_coding	ZDB-GENE-060825-222	100690097	I3JTS6	GO:0005509	calcium ion binding	molecular_function	PTHR19237	PRECURSOR	GO:0003674;GO:0043167	molecular_function;ion binding
ENSONIG00000012867	zinc finger CCCH-type containing 12B	zc3h12b	18.1287	23.9546	-1.32495	-0.405942	4.3052	7.39461	0.00654198	0.306786	1	protein_coding	ZDB-GENE-060526-290			GO:0046872	metal ion binding	molecular_function	PTHR12876_SF27	PROBABLE RIBONUCLEASE Z B EC_3.1.-.- MCP INDUCED 2 ZINC FINGER CCCH DOMAIN CONTAINING 12B	GO:0003674;GO:0043167	molecular_function;ion binding
ENSONIG00000021233	potassium voltage-gated channel subfamily J member 2	kcnj2a	7.19723	4.58976	1.56884	0.649695	2.55028	7.38757	0.00656762	0.306786	1	protein_coding	ZDB-GENE-120319-1	100692542	I3KZI8	GO:0005242;GO:0006813;GO:0016021;GO:0016020;GO:0005244;GO:0006811;GO:0034220;GO:0034765;GO:0071805	inward rectifier potassium channel activity;potassium ion transport;integral component of membrane;membrane;voltage-gated ion channel activity;ion transport;ion transmembrane transport;regulation of ion transmembrane transport;potassium ion transmembrane transport	molecular_function;biological_process;cellular_component	PTHR11767	INWARD RECTIFIER POTASSIUM CHANNEL INWARD RECTIFIER K + CHANNEL POTASSIUM CHANNEL INWARDLY RECTIFYING SUBFAMILY J MEMBER	GO:0005575;GO:0006810;GO:0022857;GO:0003674;GO:0055085	cellular_component;transport;transmembrane transporter activity;molecular_function;transmembrane transport
ENSONIG00000000131			1.29856	0.559034	2.30625	1.20555	0.183405	7.3613	0.00666426	0.308772	2	protein_coding							PTHR13771_SF9	INTERCELLULAR ADHESION MOLECULE 3 PRECURSOR ICAM 3 CD50 ANTIGEN
ENSONIG00000010490	Usher syndrome 1C	ush1c	3.71068	5.84363	-1.56906	-0.649896	2.35445	7.36323	0.0066571	0.308772	2	protein_coding	ZDB-GENE-060312-41			GO:0007605;GO:0051015;GO:0005515	sensory perception of sound;actin filament binding;protein binding	biological_process;molecular_function	PTHR23116	PDZ DOMAIN CONTAINING	GO:0003674;GO:0008092;GO:0050877	molecular_function;cytoskeletal protein binding;nervous system process
ENSONIG00000024646			0.637289	1.61214	-2.46726	-1.30291	0.271342	7.36038	0.00666765	0.308772	1	lincRNA
ENSONIG00000008679	dnaJ homolog subfamily B member 9	dnajb9a	89.7327	74.8002	1.19961	0.26256	6.40042	7.34822	0.00671292	0.308883	1	protein_coding	ZDB-GENE-050626-115	100706374	I3JPW5	GO:0016020;GO:0016021	membrane;integral component of membrane	cellular_component	PTHR24077_SF198	DNAJ HOMOLOG SUBFAMILY B MEMBER 9 PRECURSOR ENDOPLASMIC RETICULUM DNA J DOMAIN CONTAINING 4 ER RESIDENT ERDJ4 ERDJ4 MICROVASCULAR ENDOTHELIAL DIFFERENTIATION GENE 1 MDG 1	GO:0005575	cellular_component
ENSONIG00000011662	calcium channel, voltage-dependent, L type, alpha 1C subunit	cacna1c	22.2585	37.9038	-1.70573	-0.77039	4.80131	7.35163	0.00670018	0.308883	1	protein_coding	ZDB-GENE-020129-1			GO:0005891;GO:0070588;GO:0005245;GO:0005216;GO:0006811;GO:0055085;GO:0016020;GO:0016021;GO:0005244;GO:0034765;GO:0005262;GO:0006816;GO:0001822;GO:0001947;GO:0003007;GO:0003301;GO:0008016;GO:0048701;GO:0070509	voltage-gated calcium channel complex;calcium ion transmembrane transport;voltage-gated calcium channel activity;ion channel activity;ion transport;transmembrane transport;membrane;integral component of membrane;voltage-gated ion channel activity;regulation of ion transmembrane transport;calcium channel activity;calcium ion transport;kidney development;heart looping;heart morphogenesis;physiologi…	cellular_component;biological_process;molecular_function	PTHR10037_SF188	VOLTAGE DEPENDENT L TYPE CALCIUM CHANNEL SUBUNIT ALPHA 1C CALCIUM CHANNEL L TYPE ALPHA 1 POLYPEPTIDE 1 CARDIAC MUSCLE VOLTAGE GATED CALCIUM CHANNEL SUBUNIT ALPHA CAV1 2	GO:0005575;GO:0006810;GO:0055085;GO:0022857;GO:0003674;GO:0032991;GO:0048856;GO:0040007;GO:0009790	cellular_component;transport;transmembrane transport;transmembrane transporter activity;molecular_function;protein-containing complex;anatomical structure development;growth;embryo development
ENSONIG00000023588			0.443201	1.28207	-2.89236	-1.53225	-0.151068	7.34567	0.00672244	0.308883	1	lincRNA
ENSONIG00000017096	cell growth regulator with EF-hand domain 1	cgref1	57.7364	47.194	1.22318	0.290642	5.77812	7.33843	0.00674959	0.309327	1	protein_coding	ZDB-GENE-131121-137		I3KKB4	GO:0005509	calcium ion binding	molecular_function	TF653310	CELL GROWTH REGULATOR WITH EF HAND DOMAIN 1	GO:0003674;GO:0043167	molecular_function;ion binding
ENSONIG00000007828	collagen, type VI, alpha 3	col6a3	2.1126	4.27773	-2.00639	-1.0046	1.63139	7.31824	0.00682581	0.309834	1	protein_coding	ZDB-GENE-070501-8			GO:0004867;GO:0005515;GO:0010951	serine-type endopeptidase inhibitor activity;protein binding;negative regulation of endopeptidase activity	molecular_function;biological_process	PTHR22992_SF83	COLLAGEN ALPHA 3 VI CHAIN PRECURSOR	GO:0003674;GO:0030234	molecular_function;enzyme regulator activity
ENSONIG00000011661	ATP-binding cassette, sub-family G (WHITE), member 2a	abcg2a	20.0164	13.7438	1.45808	0.544072	4.05032	7.31269	0.00684693	0.309834	1	protein_coding	ZDB-GENE-050517-35			GO:0016887;GO:0005524;GO:0016020;GO:0016021;GO:0000166;GO:0043190	ATPase activity;ATP binding;membrane;integral component of membrane;nucleotide binding;ATP-binding cassette (ABC) transporter complex	molecular_function;cellular_component	PTHR19241_SF202	ATP BINDING CASSETTE SUB FAMILY G WHITE MEMBER 2A	GO:0005575;GO:0003674;GO:0043167;GO:0016887;GO:0032991	cellular_component;molecular_function;ion binding;ATPase activity;protein-containing complex
ENSONIG00000013692	human immunodeficiency virus type I enhancer binding protein 1	hivep1	153.716	184.556	-1.20103	-0.264277	7.44248	7.31521	0.00683733	0.309834	1	protein_coding	ZDB-GENE-070912-512	100704881	I3K7Y5	GO:0008270;GO:0003676;GO:0046872	zinc ion binding;nucleic acid binding;metal ion binding	molecular_function	PTHR23233_SF48	ZINC FINGER 40 BINDING 1 BINDING FACTOR	GO:0003674;GO:0043167	molecular_function;ion binding
ENSONIG00000016056	cadherin-related family member 1	CDHR1 (1 of many)	34.0974	23.6956	1.43682	0.522877	4.92425	7.31574	0.00683533	0.309834	1	protein_coding		100701351	I3KGI1	GO:0007155;GO:0007156;GO:0005886;GO:0005509;GO:0016020;GO:0016021	cell adhesion;homophilic cell adhesion via plasma membrane adhesion molecules;plasma membrane;calcium ion binding;membrane;integral component of membrane	biological_process;cellular_component;molecular_function	PTHR24027_SF2	CADHERIN RELATED FAMILY MEMBER 1 PRECURSOR PHOTORECEPTOR CADHERIN PRCAD PROTOCADHERIN 21	GO:0005575;GO:0003674;GO:0043167;GO:0005886;GO:0007155	cellular_component;molecular_function;ion binding;plasma membrane;cell adhesion
ENSONIG00000022301			380.179	1225.98	-3.22462	-1.68913	9.46693	7.31235	0.00684822	0.309834	1	lincRNA
ENSONIG00000000118	StAR-related lipid transfer (START) domain containing 15	stard15	6.43413	4.15913	1.5575	0.639232	2.4613	7.29469	0.00691589	0.310235	1	protein_coding	ZDB-GENE-070424-267			GO:0008289	lipid binding	molecular_function	PTHR19308_SF2	UNCHARACTERIZED	GO:0003674;GO:0008289	molecular_function;lipid binding
ENSONIG00000003509	phosphatidylinositol 4-kinase type 2 beta	pi4k2b	8.77329	19.2966	-2.19739	-1.13579	3.7795	7.27124	0.00700673	0.310235	1	protein_coding	ZDB-GENE-070112-990	100706827	I3J6C9	GO:0004430;GO:0046854	1-phosphatidylinositol 4-kinase activity;phosphatidylinositol phosphorylation	molecular_function;biological_process	PTHR12865	PHOSPHATIDYLINOSITOL 4 KINASE TYPE 2 EC_2.7.1.67 PHOSPHATIDYLINOSITOL 4 KINASE TYPE II	GO:0016301;GO:0006629	kinase activity;lipid metabolic process	00562+2.7.1.67;04070+2.7.1.67
ENSONIG00000006649			2.9496	0.959368	3.08278	1.62423	1.0931	7.30342	0.00688233	0.310235	1	protein_coding
ENSONIG00000007346	dehydrogenase/reductase X-linked		31.4571	23.5689	1.33462	0.416432	4.92481	7.27575	0.00698918	0.310235	2	protein_coding		100705640	I3JK77;I3JK76				PTHR24320_SF50	PROBABLE OXIDOREDUCTASE ENV9 EC_1.1.1.- LATE ENDOSOME AND VACUOLE INTERFACE 9
ENSONIG00000009250	PQ loop repeat containing 2	pqlc2	67.329	53.2487	1.26373	0.337691	5.98532	7.2916	0.00692777	0.310235	1	protein_coding	ZDB-GENE-050306-4	100706031	I3JRY8	GO:0016020;GO:0016021	membrane;integral component of membrane	cellular_component	PTHR16201_SF36	LYSOSOMAL AMINO ACID TRANSPORTER 1 HOMOLOG PQ LOOP REPEAT CONTAINING 2	GO:0005575	cellular_component
ENSONIG00000010581	integrin alpha-11	ITGA11 (1 of many)	2.77821	4.56638	-1.65675	-0.728353	1.94294	7.2904	0.00693241	0.310235	2	protein_coding		100691061	I3JWQ8;I3JWQ9	GO:0008305;GO:0007155;GO:0016020;GO:0016021;GO:0007229	integrin complex;cell adhesion;membrane;integral component of membrane;integrin-mediated signaling pathway	cellular_component;biological_process	PTHR23220_SF21	INTEGRIN ALPHA 11 PRECURSOR	GO:0007155;GO:0032991;GO:0005575;GO:0007165	cell adhesion;protein-containing complex;cellular_component;signal transduction
ENSONIG00000013804	armadillo repeat containing 8	armc8	15.2858	20.7736	-1.36517	-0.449083	4.12076	7.26466	0.00703246	0.310235	1	protein_coding	ZDB-GENE-061027-88	100698092	I3K8B4	GO:0005515	protein binding	molecular_function	PTHR15651	ARMADILLO REPEAT CONTAINING 8	GO:0003674	molecular_function
ENSONIG00000017171	lipin 1	lpin1	63.5295	78.2223	-1.2305	-0.29924	6.16359	7.27641	0.00698661	0.310235	2	protein_coding	ZDB-GENE-080722-2						PTHR12181_SF10	PHOSPHATIDATE PHOSPHATASE LPIN1 EC_3.1.3.4 LIPIN 1			00565+3.1.3.4;00600+3.1.3.4;00561+3.1.3.4;00564+3.1.3.4
ENSONIG00000019840			5.06811	3.09858	1.63202	0.706662	2.10974	7.26687	0.00702382	0.310235	1	protein_coding				GO:0015858;GO:1901642;GO:0005337;GO:0005887;GO:0016021;GO:0016020	nucleoside transport;nucleoside transmembrane transport;nucleoside transmembrane transporter activity;integral component of plasma membrane;integral component of membrane;membrane	biological_process;molecular_function;cellular_component	PTHR10332	EQUILIBRATIVE NUCLEOSIDE TRANSPORTER EQUILIBRATIVE NITROBENZYLMERCAPTOPURINE RIBOSIDE NUCLEOSIDE TRANSPORTER EQUILIBRATIVE NBMPR NUCLEOSIDE TRANSPORTER NUCLEOSIDE TRANSPORTER TYPE SOLUTE CARRIER FAMILY 29 MEMBER	GO:0005575;GO:0022857;GO:0003674;GO:0006810;GO:0055085	cellular_component;transmembrane transporter activity;molecular_function;transport;transmembrane transport
ENSONIG00000020066			7.16617	11.4691	-1.60611	-0.68357	3.12029	7.26848	0.00701752	0.310235	1	protein_coding				GO:0046983	protein dimerization activity	molecular_function	PTHR11697_SF85	UNCHARACTERIZED	GO:0003674	molecular_function
ENSONIG00000003419	multidrug and toxin extrusion protein 1		32.1068	24.2301	1.32506	0.406058	4.67207	7.22276	0.0071985	0.311615	2	protein_coding		100693082	I3J616;I3J615	GO:0055085;GO:0016020;GO:0015238;GO:0015297;GO:0006855;GO:0016021	transmembrane transport;membrane;drug transmembrane transporter activity;antiporter activity;drug transmembrane transport;integral component of membrane	biological_process;cellular_component;molecular_function	PTHR11206_SF96	MULTIDRUG AND TOXIN EXTRUSION 1 MATE 1 SOLUTE CARRIER FAMILY 47 MEMBER 1	GO:0005575;GO:0006810;GO:0055085;GO:0022857;GO:0003674	cellular_component;transport;transmembrane transport;transmembrane transporter activity;molecular_function
ENSONIG00000006874	grainyhead-like protein 2 homolog		1.19746	0.445983	2.63482	1.39771	0.000762414	7.22784	0.00717814	0.311615	2	protein_coding		100702118		GO:0006357;GO:0003700	regulation of transcription by RNA polymerase II;DNA-binding transcription factor activity	biological_process;molecular_function	PTHR11037_SF17	GRAINYHEAD 2 HOMOLOG BROTHER OF MAMMALIAN GRAINYHEAD TRANSCRIPTION FACTOR CP2 3	GO:0003674;GO:0003700	molecular_function;DNA-binding transcription factor activity
ENSONIG00000008175	hook microtubule tethering protein 2	hook2	14.8071	18.9044	-1.2771	-0.352869	4.11417	7.22516	0.00718888	0.311615	2	protein_coding	ZDB-GENE-040426-1636	100710484	I3JN47;I3JN48	GO:0005515	protein binding	molecular_function	PTHR18947_SF8	HOOK HOMOLOG 2	GO:0003674	molecular_function
ENSONIG00000009148	ventral anterior homeobox 1	vax1	33.0354	24.5747	1.34395	0.426483	4.87999	7.22181	0.0072023	0.311615	1	protein_coding	ZDB-GENE-030904-9			GO:0007420;GO:0007411;GO:0043565;GO:0003700;GO:0006355;GO:0003677;GO:0005634	brain development;axon guidance;sequence-specific DNA binding;DNA-binding transcription factor activity;regulation of transcription, DNA-templated;DNA binding;nucleus	biological_process;molecular_function;cellular_component	PTHR24339_SF27	VENTRAL ANTERIOR HOMEOBOX 1	GO:0003674;GO:0003677;GO:0003700;GO:0048856;GO:0005575;GO:0043226;GO:0005634	molecular_function;DNA binding;DNA-binding transcription factor activity;anatomical structure development;cellular_component;organelle;nucleus
ENSONIG00000014621	calcium and integrin binding 1 (calmyrin)	cib1	25.6056	31.9999	-1.25081	-0.322868	4.76665	7.22122	0.00720467	0.311615	1	protein_coding	ZDB-GENE-050417-170			GO:0005509	calcium ion binding	molecular_function	PTHR23056_SF32	CALCIUM AND INTEGRIN BINDING 1 CIB CALMYRIN DNA PKCS INTERACTING KINASE INTERACTING KIP	GO:0003674;GO:0043167	molecular_function;ion binding
ENSONIG00000016336	adenylate cyclase 9	adcy9	3.41441	5.54956	-1.63642	-0.710546	2.10825	7.2522	0.00708142	0.311615	1	protein_coding	ZDB-GENE-050208-455			GO:0009190;GO:0016849;GO:0035556;GO:0016020;GO:0016021;GO:0000166;GO:0016829	cyclic nucleotide biosynthetic process;phosphorus-oxygen lyase activity;intracellular signal transduction;membrane;integral component of membrane;nucleotide binding;lyase activity	biological_process;molecular_function;cellular_component	PTHR11920_SF272	ADENYLATE CYCLASE TYPE 9 EC_4.6.1.1 ATP PYROPHOSPHATE LYASE 9 ADENYLATE CYCLASE TYPE IX ADENYLYL CYCLASE 9	GO:0007165;GO:0016829;GO:0009058;GO:0044281;GO:0034641;GO:0005575;GO:0003674	signal transduction;lyase activity;biosynthetic process;small molecule metabolic process;cellular nitrogen compound metabolic process;cellular_component;molecular_function
ENSONIG00000017893	zinc finger, DHHC-type containing 15b	zdhhc15b	38.3958	31.7052	1.21246	0.277936	5.2166	7.23359	0.00715521	0.311615	1	protein_coding	ZDB-GENE-061110-106			GO:0016020;GO:0016021;GO:0016740;GO:0016746;GO:0019706;GO:0008270;GO:0018230;GO:0030900;GO:0045234;GO:0071542;GO:0030173	membrane;integral component of membrane;transferase activity;transferase activity, transferring acyl groups;protein-cysteine S-palmitoyltransferase activity;zinc ion binding;peptidyl-L-cysteine S-palmitoylation;forebrain development;protein palmitoleylation;dopaminergic neuron differentiation;integral component of Golgi membrane	cellular_component;molecular_function;biological_process	PTHR22883_SF6	PALMITOYLTRANSFERASE ZDHHC15 EC_2.3.1.225 ZINC FINGER DHHC DOMAIN CONTAINING 15 DHHC 15	GO:0005575;GO:0016746;GO:0003674;GO:0043167;GO:0006464;GO:0048856;GO:0030154	cellular_component;transferase activity, transferring acyl groups;molecular_function;ion binding;cellular protein modification process;anatomical structure development;cell differentiation
ENSONIG00000024830			6.32997	12.4176	-1.95753	-0.969035	3.2031	7.22285	0.00719814	0.311615	1	lincRNA
ENSONIG00000004372	fibronectin	fn1a	27.0308	40.5841	-1.50333	-0.588161	4.95975	7.204	0.00727412	0.312374	2	protein_coding	ZDB-GENE-000426-1	100689834	I3J9G5;I3J9G6	GO:0005576;GO:0005515;GO:0005178;GO:0001756;GO:0001757;GO:0002042;GO:0002089;GO:0003007;GO:0003128;GO:0003146;GO:0003319;GO:0007507;GO:0021591;GO:0030325;GO:0035050;GO:0045198;GO:0048703;GO:0060956;GO:0070309;GO:0098609;GO:0005614	extracellular region;protein binding;integrin binding;somitogenesis;somite specification;cell migration involved in sprouting angiogenesis;lens morphogenesis in camera-type eye;heart morphogenesis;heart field specification;heart jogging;cardioblast migration to the midline involved in heart rudiment formation;heart development;ventricular system development;adrenal gland development;embryonic hea…	cellular_component;molecular_function;biological_process	PTHR19143_SF187	FIBRONECTIN FN	GO:0003674;GO:0005575;GO:0005576;GO:0048646;GO:0048870;GO:0040011;GO:0048856;GO:0030154;GO:0009790;GO:0000902;GO:0007155;GO:0031012	molecular_function;cellular_component;extracellular region;anatomical structure formation involved in morphogenesis;cell motility;locomotion;anatomical structure development;cell differentiation;embryo development;cell morphogenesis;cell adhesion;extracellular matrix
ENSONIG00000005876	adaptor related protein complex 1 subunit gamma 1	ap1g1	49.8488	61.1346	-1.22805	-0.296373	5.79595	7.20945	0.00725209	0.312374	1	protein_coding	ZDB-GENE-030131-3187	100711017		GO:0030117;GO:0016192;GO:0006886;GO:0005794;GO:0030121;GO:0016020;GO:0005737;GO:0015031;GO:0031410;GO:0001944;GO:0003401;GO:0007417;GO:0033339	membrane coat;vesicle-mediated transport;intracellular protein transport;Golgi apparatus;AP-1 adaptor complex;membrane;cytoplasm;protein transport;cytoplasmic vesicle;vasculature development;axis elongation;central nervous system development;pectoral fin development	cellular_component;biological_process	PTHR22780	AP COMPLEX SUBUNIT ADAPTOR COMPLEX AP SUBUNIT ADAPTOR RELATED COMPLEX SUBUNIT CLATHRIN ASSEMBLY COMPLEX LARGE CHAIN ADAPTOR ADAPTIN SUBUNIT	GO:0005575;GO:0043226;GO:0005794;GO:0006810;GO:0016192;GO:0032991;GO:0005737;GO:0031410;GO:0048856;GO:0040007	cellular_component;organelle;Golgi apparatus;transport;vesicle-mediated transport;protein-containing complex;cytoplasm;cytoplasmic vesicle;anatomical structure development;growth
ENSONIG00000013643			0.651747	1.67093	-2.57036	-1.36197	0.454734	7.19505	0.00731051	0.312374	1	protein_coding				GO:0005515;GO:0046872	protein binding;metal ion binding	molecular_function	PTHR25462_SF201	TRIM	GO:0003674;GO:0043167	molecular_function;ion binding
ENSONIG00000019297	espin-like protein	espnla	2.53025	0.861425	2.92438	1.54813	0.991283	7.20103	0.00728618	0.312374	3	protein_coding	ZDB-GENE-131121-3	100690913	I3KT39;I3KT37;I3KT38	GO:0005515	protein binding	molecular_function	PTHR24153_SF0	ESPIN	GO:0003674	molecular_function
ENSONIG00000025071			0.830669	2.09385	-2.54275	-1.34639	0.494284	7.19687	0.00730309	0.312374	1	lincRNA
ENSONIG00000001074	cholesterol 24-hydroxylase	cyp46a1.4	30.7829	24.2107	1.27112	0.346105	4.89385	7.16011	0.00745427	0.313143	1	protein_coding	ZDB-GENE-040426-1224	100704054	I3IXM3	GO:0006707;GO:0033781;GO:0020037;GO:0016705;GO:0005506;GO:0055114;GO:0016020;GO:0016021;GO:0016491;GO:0046872;GO:0004497	cholesterol catabolic process;cholesterol 24-hydroxylase activity;heme binding;oxidoreductase activity, acting on paired donors, with incorporation or reduction of molecular oxygen;iron ion binding;oxidation-reduction process;membrane;integral component of membrane;oxidoreductase activity;metal ion binding;monooxygenase activity	biological_process;molecular_function;cellular_component	PTHR24293	CHOLESTEROL 24 HYDROXYLASE CH24H EC_1.14.14.25 CYTOCHROME P450 46A1	GO:0003674;GO:0043167;GO:0016491;GO:0044281;GO:0009056;GO:0006629;GO:0005575	molecular_function;ion binding;oxidoreductase activity;small molecule metabolic process;catabolic process;lipid metabolic process;cellular_component	00120+1.14.14.25
ENSONIG00000001681	minichromosome maintenance 9 homologous recombination repair factor	mcm9	0.693517	1.96936	-2.77836	-1.47423	0.534252	7.18265	0.00736117	0.313143	1	protein_coding	ZDB-GENE-041014-310	100700864	I3IZR4	GO:0006270;GO:0005524;GO:0003677;GO:0000166	DNA replication initiation;ATP binding;DNA binding;nucleotide binding	biological_process;molecular_function	PTHR11630	DNA REPLICATION LICENSING FACTOR EC_3.6.4.12	GO:0003674;GO:0003677;GO:0043167;GO:0006259;GO:0034641	molecular_function;DNA binding;ion binding;DNA metabolic process;cellular nitrogen compound metabolic process
ENSONIG00000003098	ADP-ribosylation factor-like protein 6	arl6	56.4963	45.7458	1.23571	0.305339	5.75152	7.14357	0.00752334	0.313143	2	protein_coding	ZDB-GENE-041219-2	100696267	I3J4U2;I3J4U1	GO:0005525;GO:0000166;GO:0007368;GO:0007369;GO:0007601;GO:0008593;GO:0032402;GO:0033339;GO:0060271;GO:0070121	GTP binding;nucleotide binding;determination of left/right symmetry;gastrulation;visual perception;regulation of Notch signaling pathway;melanosome transport;pectoral fin development;cilium assembly;Kupffer's vesicle development	molecular_function;biological_process	PTHR11711_SF21	ADP RIBOSYLATION FACTOR 6	GO:0003674;GO:0043167;GO:0050877;GO:0006810;GO:0048856;GO:0022607	molecular_function;ion binding;nervous system process;transport;anatomical structure development;cellular component assembly
ENSONIG00000010446	breast carcinoma amplified sequence 3	bcas3	34.9925	42.5833	-1.21865	-0.285287	5.28175	7.15065	0.00749367	0.313143	1	protein_coding	ZDB-GENE-040426-1257			GO:0005515	protein binding	molecular_function	PTHR13268	BREAST CARCINOMA AMPLIFIED SEQUENCE 3	GO:0003674	molecular_function
ENSONIG00000014114	toll like receptor 2		5.98462	2.66295	2.25173	1.17103	2.14869	7.14706	0.00750869	0.313143	2	protein_coding		100694547	I3K9E9;I3K9E8	GO:0045087;GO:0006954;GO:0016021;GO:0007165;GO:0005515;GO:0002755;GO:0050729;GO:0002237;GO:0034134;GO:0050707;GO:0016020	innate immune response;inflammatory response;integral component of membrane;signal transduction;protein binding;MyD88-dependent toll-like receptor signaling pathway;positive regulation of inflammatory response;response to molecule of bacterial origin;toll-like receptor 2 signaling pathway;regulation of cytokine secretion;membrane	biological_process;cellular_component;molecular_function	PTHR24365_SF17	TOLL RECEPTOR 2 PRECURSOR CD282 ANTIGEN	GO:0003674;GO:0007165;GO:0005575;GO:0006950;GO:0002376	molecular_function;signal transduction;cellular_component;response to stress;immune system process
ENSONIG00000014451	Ras protein specific guanine nucleotide releasing factor 2	RASGRF2	276.508	327.414	-1.18424	-0.243962	8.25436	7.15377	0.00748066	0.313143	1	protein_coding				GO:0046578;GO:0005085;GO:0007264;GO:0035023;GO:0005089;GO:0005622;GO:0005515	regulation of Ras protein signal transduction;guanyl-nucleotide exchange factor activity;small GTPase mediated signal transduction;regulation of Rho protein signal transduction;Rho guanyl-nucleotide exchange factor activity;intracellular;protein binding	biological_process;molecular_function;cellular_component	PTHR23113_SF187	RAS SPECIFIC GUANINE NUCLEOTIDE RELEASING FACTOR 2 RAS GRF2 RAS GUANINE NUCLEOTIDE EXCHANGE FACTOR 2	GO:0003674;GO:0005575;GO:0005622;GO:0007165	molecular_function;cellular_component;intracellular;signal transduction
ENSONIG00000015213			0.17328	3.94581	-22.0448	-4.46237	0.613009	7.13938	0.00754092	0.313143	1	protein_coding
ENSONIG00000017491			1.70156	3.51172	-2.05564	-1.03959	1.37315	7.14624	0.00751214	0.313143	1	protein_coding			I3KLR3	GO:0004996;GO:0016500;GO:0016021;GO:0007186;GO:0004930;GO:0016020;GO:0007165;GO:0005886;GO:0038194	thyroid-stimulating hormone receptor activity;protein-hormone receptor activity;integral component of membrane;G protein-coupled receptor signaling pathway;G protein-coupled receptor activity;membrane;signal transduction;plasma membrane;thyroid-stimulating hormone signaling pathway	molecular_function;cellular_component;biological_process	PTHR24372_SF0	THYROTROPIN RECEPTOR PRECURSOR THYROID STIMULATING HORMONE RECEPTOR TSH R	GO:0003674;GO:0007165;GO:0005575;GO:0005886	molecular_function;signal transduction;cellular_component;plasma membrane
ENSONIG00000017810	neuralized E3 ubiquitin protein ligase 1B	neurl1b	35.0692	26.8423	1.30816	0.387544	5.02456	7.15308	0.00748355	0.313143	2	protein_coding	ZDB-GENE-050522-102						PTHR12429_SF7	E3 UBIQUITIN LIGASE NEURL1B EC_2.3.2.27 NEURALIZED 2 NEUR2 NEURALIZED 1B NEURALIZED 3 RING TYPE E3 UBIQUITIN TRANSFERASE NEURL1B
ENSONIG00000020052	REX4 homolog, 3'-5' exonuclease	rexo4	7.98882	5.4621	1.46516	0.551061	2.78601	7.17679	0.00738527	0.313143	1	protein_coding	ZDB-GENE-050411-124		I3KVW1	GO:0006364;GO:0008408;GO:0003676;GO:0090305	rRNA processing;3'-5' exonuclease activity;nucleic acid binding;nucleic acid phosphodiester bond hydrolysis	biological_process;molecular_function	PTHR12801_SF49	RNA EXONUCLEASE 4 EC_3.1.-.-	GO:0003674;GO:0004518;GO:0034641	molecular_function;nuclease activity;cellular nitrogen compound metabolic process
ENSONIG00000021050	transcription factor AP-1	june	25.8852	34.4676	-1.32941	-0.41079	4.91806	7.1673	0.00742445	0.313143	1	protein_coding	ZDB-GENE-060929-812	100707786	I3KZ06	GO:0003700;GO:0006355;GO:0003677;GO:0005634	DNA-binding transcription factor activity;regulation of transcription, DNA-templated;DNA binding;nucleus	molecular_function;biological_process;cellular_component	PTHR11462_SF38	JUNE PROTO ONCOGENE AP 1 TRANSCRIPTION FACTOR SUBUNIT	GO:0003674;GO:0003677;GO:0003700;GO:0005575;GO:0043226;GO:0005634	molecular_function;DNA binding;DNA-binding transcription factor activity;cellular_component;organelle;nucleus
ENSONIG00000023975			4.84482	7.5788	-1.57457	-0.654959	2.51917	7.1546	0.00747719	0.313143	1	lincRNA
ENSONIG00000013465	protein phosphatase 3 catalytic subunit alpha	PPP3CA	381.864	503.993	-1.31992	-0.400446	8.79858	7.12097	0.00761875	0.315634	3	protein_coding			I3K738;I3K737;I3K736	GO:0016787;GO:0004721;GO:0006470	hydrolase activity;phosphoprotein phosphatase activity;protein dephosphorylation	molecular_function;biological_process	PTHR11668_SF192	SERINE/THREONINE PHOSPHATASE 2B CATALYTIC SUBUNIT ALPHA EC_3.1.3.16 CAM PRP CATALYTIC SUBUNIT CALMODULIN DEPENDENT CALCINEURIN A SUBUNIT ALPHA	GO:0016791;GO:0006464	phosphatase activity;cellular protein modification process	04660+3.1.3.16;04658+3.1.3.16
ENSONIG00000004202	synaptoporin	synpr	52.166	42.0452	1.24122	0.311754	5.63358	7.1158	0.00764074	0.315805	1	protein_coding	ZDB-GENE-030616-625			GO:0008021;GO:0016020;GO:0016021	synaptic vesicle;membrane;integral component of membrane	cellular_component	PTHR10306	SYNAPTOPHYSIN	GO:0005575;GO:0043226;GO:0031410	cellular_component;organelle;cytoplasmic vesicle
ENSONIG00000006893			7.39681	10.7286	-1.45667	-0.542672	3.16721	7.08015	0.00779424	0.318319	1	protein_coding				GO:0008270;GO:0003676;GO:0046872	zinc ion binding;nucleic acid binding;metal ion binding	molecular_function	PTHR23067_SF8	ZINC FINGER 385B ZINC FINGER 533	GO:0003674;GO:0043167	molecular_function;ion binding
ENSONIG00000012883	calcium channel, voltage-dependent, N type, alpha 1B subunit, b	cacna1bb	78.9502	98.7967	-1.25109	-0.323187	6.45093	7.0924	0.00774115	0.318319	1	protein_coding	ZDB-GENE-090514-4			GO:0005891;GO:0070588;GO:0005245;GO:0005216;GO:0006811;GO:0055085;GO:0016020;GO:0016021;GO:0005244;GO:0034765;GO:0005262;GO:0006816	voltage-gated calcium channel complex;calcium ion transmembrane transport;voltage-gated calcium channel activity;ion channel activity;ion transport;transmembrane transport;membrane;integral component of membrane;voltage-gated ion channel activity;regulation of ion transmembrane transport;calcium channel activity;calcium ion transport	cellular_component;biological_process;molecular_function	PTHR10037_SF161	VOLTAGE DEPENDENT N TYPE CALCIUM CHANNEL SUBUNIT ALPHA 1B BRAIN CALCIUM CHANNEL III BIII CALCIUM CHANNEL L TYPE ALPHA 1 POLYPEPTIDE 5 VOLTAGE GATED CALCIUM CHANNEL SUBUNIT ALPHA CAV2 2	GO:0005575;GO:0006810;GO:0055085;GO:0022857;GO:0003674;GO:0032991	cellular_component;transport;transmembrane transport;transmembrane transporter activity;molecular_function;protein-containing complex
ENSONIG00000014354	clathrin heavy chain 1	cltcl1	150.285	183.358	-1.22047	-0.287443	7.38105	7.08405	0.0077773	0.318319	1	protein_coding	ZDB-GENE-130530-1029	100691387	I3KAA2	GO:0016192;GO:0005198;GO:0048268;GO:0006886;GO:0005515;GO:0030130;GO:0030132;GO:0032051;GO:0071439;GO:0016020;GO:0030659;GO:0031410;GO:0005905	vesicle-mediated transport;structural molecule activity;clathrin coat assembly;intracellular protein transport;protein binding;clathrin coat of trans-Golgi network vesicle;clathrin coat of coated pit;clathrin light chain binding;clathrin complex;membrane;cytoplasmic vesicle membrane;cytoplasmic vesicle;clathrin-coated pit	biological_process;molecular_function;cellular_component	PTHR10292	CLATHRIN HEAVY CHAIN	GO:0003674;GO:0006810;GO:0022607;GO:0065003;GO:0005198;GO:0016192;GO:0032991;GO:0005575;GO:0043226;GO:0031410	molecular_function;transport;cellular component assembly;protein-containing complex assembly;structural molecule activity;vesicle-mediated transport;protein-containing complex;cellular_component;organelle;cytoplasmic vesicle
ENSONIG00000017069	aquaporin AQPAe.a		44.9728	32.3067	1.39453	0.479781	5.36914	7.09637	0.007724	0.318319	1	protein_coding		102077241	I3KK78	GO:0015267;GO:0055085;GO:0016020;GO:0016021	channel activity;transmembrane transport;membrane;integral component of membrane	molecular_function;biological_process;cellular_component	PTHR19139_SF34	AQUAPORIN 4 AQP 4 MERCURIAL INSENSITIVE WATER CHANNEL MIWC WCH4	GO:0005575;GO:0006810;GO:0055085;GO:0022857;GO:0003674	cellular_component;transport;transmembrane transport;transmembrane transporter activity;molecular_function
ENSONIG00000024356			0.529707	1.30864	-2.38732	-1.25539	-0.228388	7.07903	0.00779913	0.318319	1	lincRNA
ENSONIG00000025885			4.90061	1.73127	2.8265	1.49902	1.56626	7.07664	0.00780952	0.318319	2	lincRNA
ENSONIG00000006250	ATPase phospholipid transporting 8B2	atp8b2	12.4941	17.0054	-1.3631	-0.446892	3.86224	7.07046	0.00783652	0.318685	2	protein_coding	ZDB-GENE-030131-2474	100702286	I3JG82;I3JG83	GO:0004012;GO:0015914;GO:0000287;GO:0000166;GO:0016021;GO:0005524;GO:0016020;GO:0045332	phospholipid-translocating ATPase activity;phospholipid transport;magnesium ion binding;nucleotide binding;integral component of membrane;ATP binding;membrane;phospholipid translocation	molecular_function;biological_process;cellular_component	PTHR24092_SF58	PHOSPHOLIPID TRANSPORTING ATPASE EC_7.6.2.1	GO:0003674;GO:0043167;GO:0005575;GO:0006810;GO:0016887;GO:0061024	molecular_function;ion binding;cellular_component;transport;ATPase activity;membrane organization
ENSONIG00000009909	tenascin N	tnn	1.92803	0.578084	3.28468	1.71575	0.503177	7.05002	0.00792644	0.32109	1	protein_coding	ZDB-GENE-990415-262			GO:0062023;GO:0042127;GO:0007155;GO:0005515	collagen-containing extracellular matrix;regulation of cell population proliferation;cell adhesion;protein binding	cellular_component;biological_process;molecular_function	PTHR19143_SF197	TENASCIN N	GO:0003674;GO:0007155;GO:0005575;GO:0031012	molecular_function;cell adhesion;cellular_component;extracellular matrix
ENSONIG00000012502			15.7972	11.5214	1.37063	0.454842	3.83179	7.04877	0.00793197	0.32109	1	protein_coding				GO:0016020;GO:0016021	membrane;integral component of membrane	cellular_component	PTHR16675	CLASS I HISTOCOMPATIBILITY ANTIGEN ALPHA CHAIN PRECURSOR MHC CLASS I ANTIGEN	GO:0005575	cellular_component
ENSONIG00000001394	family with sequence similarity 222 member Bb	fam222bb	7.98164	11.0574	-1.38126	-0.465987	3.35939	7.03961	0.00797263	0.32196	1	protein_coding	ZDB-GENE-110419-4						PTHR16070	UNKNOWN
ENSONIG00000019931	KIAA0556	KIAA0556	20.3635	27.3921	-1.34719	-0.42995	4.70936	7.02841	0.00802266	0.32196	1	protein_coding			I3KVF9				PTHR21534	HOMOLOG
ENSONIG00000020772	potassium voltage-gated channel subfamily A member 1	KCNA5	20.3306	27.3863	-1.34767	-0.430465	4.48769	7.0281	0.00802405	0.32196	1	protein_coding		100696994	I3KY80	GO:0008076;GO:0006813;GO:0005249;GO:0051260;GO:0005216;GO:0006811;GO:0055085;GO:0016020;GO:0005515;GO:0016021;GO:0005244;GO:0034765;GO:0005267;GO:0071805	voltage-gated potassium channel complex;potassium ion transport;voltage-gated potassium channel activity;protein homooligomerization;ion channel activity;ion transport;transmembrane transport;membrane;protein binding;integral component of membrane;voltage-gated ion channel activity;regulation of ion transmembrane transport;potassium channel activity;potassium ion transmembrane transport	cellular_component;biological_process;molecular_function	PTHR11537_SF25	POTASSIUM VOLTAGE GATED CHANNEL SUBFAMILY A MEMBER 5 VOLTAGE GATED POTASSIUM CHANNEL SUBUNIT KV1 5	GO:0003674;GO:0005575;GO:0006810;GO:0055085;GO:0022857;GO:0022607;GO:0065003;GO:0032991	molecular_function;cellular_component;transport;transmembrane transport;transmembrane transporter activity;cellular component assembly;protein-containing complex assembly;protein-containing complex
ENSONIG00000026290			2.02123	0.908849	2.21976	1.1504	0.686301	7.02761	0.00802625	0.32196	1	lincRNA
ENSONIG00000007659	RAD54 like	rad54l	9.80803	6.61509	1.48443	0.569914	3.03552	7.02233	0.00804992	0.322179	2	protein_coding	ZDB-GENE-040426-968	100706394	I3JLB0;I3JLA9	GO:0016817;GO:0005524;GO:0008094	hydrolase activity, acting on acid anhydrides;ATP binding;DNA-dependent ATPase activity	molecular_function	PTHR10799_SF208	DNA REPAIR AND RECOMBINATION RAD54 EC_3.6.4.-	GO:0003674;GO:0043167;GO:0016887	molecular_function;ion binding;ATPase activity
ENSONIG00000026264			6.14883	3.24102	1.90161	0.927224	2.03387	7.00921	0.00810917	0.323818	3	lincRNA
ENSONIG00000008176	poly(A) binding protein cytoplasmic 4	pabpc4	6.05877	4.07599	1.4822	0.567741	2.3004	7.00329	0.00813602	0.324158	1	protein_coding	ZDB-GENE-030131-9663	100711380	I3JN49	GO:0003723;GO:0003676;GO:0005737	RNA binding;nucleic acid binding;cytoplasm	molecular_function;cellular_component	PTHR24011_SF265	POLYADENYLATE BINDING 4 PABP 4 POLY A BINDING 4 ACTIVATED PLATELET 1 APP 1 INDUCIBLE POLY A BINDING IPABP	GO:0003674;GO:0003723;GO:0005575;GO:0005737	molecular_function;RNA binding;cellular_component;cytoplasm
ENSONIG00000007665	RNA-binding protein Nova-1	NOVA1	67.118	83.3167	-1.24078	-0.311252	6.21245	6.99639	0.00816742	0.324678	2	protein_coding		100701682	I3JLB8;I3JLB9	GO:0000398;GO:0003723;GO:0003676	mRNA splicing, via spliceosome;RNA binding;nucleic acid binding	biological_process;molecular_function	PTHR10288_SF143	RNA BINDING NOVA 1 NEURO ONCOLOGICAL VENTRAL ANTIGEN 1 VENTRAL NEURON SPECIFIC 1	GO:0003674;GO:0003723;GO:0034641;GO:0006397	molecular_function;RNA binding;cellular nitrogen compound metabolic process;mRNA processing
ENSONIG00000000770	ATR serine/threonine kinase	atr	5.40789	7.85747	-1.44968	-0.535737	2.57742	6.97931	0.00824574	0.325647	1	protein_coding	ZDB-GENE-070912-458			GO:0016301;GO:0004674;GO:0005515;GO:0016740;GO:0000166;GO:0005524;GO:0016310;GO:0003140;GO:0006468;GO:0008630;GO:0035469;GO:0060271;GO:1901207	kinase activity;protein serine/threonine kinase activity;protein binding;transferase activity;nucleotide binding;ATP binding;phosphorylation;determination of left/right asymmetry in lateral mesoderm;protein phosphorylation;intrinsic apoptotic signaling pathway in response to DNA damage;determination of pancreatic left/right asymmetry;cilium assembly;regulation of heart looping	molecular_function;biological_process	PTHR11139_SF64	SERINE/THREONINE KINASE ATR EC_2.7.11.1 ATAXIA TELANGIECTASIA AND RAD3 RELATED	GO:0003674;GO:0016301;GO:0043167;GO:0048856;GO:0006464;GO:0006950;GO:0007165;GO:0022607	molecular_function;kinase activity;ion binding;anatomical structure development;cellular protein modification process;response to stress;signal transduction;cellular component assembly	04151+2.7.11.1;04150+2.7.11.1;05165+2.7.11.1;04926+2.7.11.1;04714+2.7.11.1;05170+2.7.11.1;05163+2.7.11.1
ENSONIG00000010261	poly (ADP-ribose) polymerase family, member 4	parp4	33.8718	42.6902	-1.2609	-0.334452	5.2186	6.97903	0.00824703	0.325647	1	protein_coding	ZDB-GENE-070912-387			GO:0003950;GO:0006471;GO:0016740;GO:0016757	NAD+ ADP-ribosyltransferase activity;protein ADP-ribosylation;transferase activity;transferase activity, transferring glycosyl groups	molecular_function;biological_process	PTHR10338_SF7	MONO ADP RIBOSYLTRANSFERASE PARP4 EC_2.4.2.- ADP RIBOSYLTRANSFERASE DIPHTHERIA TOXIN 4 ARTD4 POLY [ADP RIBOSE] POLYMERASE 4 PARP 4 VAULT POLY ADP RIBOSE POLYMERASE VPARP	GO:0016757;GO:0006464	transferase activity, transferring glycosyl groups;cellular protein modification process
ENSONIG00000013848	dpy-19 like 4	DPY19L4	37.2354	30.1094	1.23734	0.307236	5.1763	6.98098	0.00823803	0.325647	1	protein_coding		100691367	I3K8G7	GO:0016021;GO:0016020	integral component of membrane;membrane	cellular_component	PTHR31488	PROBABLE C MANNOSYLTRANSFERASE DP EC_2.4.1.- DPY 19 DPY 19 HOMOLOG	GO:0005575	cellular_component
ENSONIG00000021001	hydroxycarboxylic acid receptor 2		26.759	21.902	1.22228	0.289579	4.66978	6.9744	0.0082684	0.325764	1	protein_coding		100690406	I3KYV7	GO:0016021;GO:0007186;GO:0004930;GO:0016020;GO:0007165	integral component of membrane;G protein-coupled receptor signaling pathway;G protein-coupled receptor activity;membrane;signal transduction	cellular_component;biological_process;molecular_function	PTHR24231	RECEPTOR G COUPLED RECEPTOR	GO:0003674;GO:0007165;GO:0005575	molecular_function;signal transduction;cellular_component
ENSONIG00000000502	neuroblastoma amplified sequence	nbas	22.5697	28.7858	-1.27466	-0.350115	4.66422	6.94464	0.00840709	0.329618	1	protein_coding	ZDB-GENE-041014-367	100702248	I3IVK2	GO:0006890;GO:0005515;GO:0000184;GO:0000956;GO:0043009;GO:2000623	retrograde vesicle-mediated transport, Golgi to endoplasmic reticulum;protein binding;nuclear-transcribed mRNA catabolic process, nonsense-mediated decay;nuclear-transcribed mRNA catabolic process;chordate embryonic development;negative regulation of nuclear-transcribed mRNA catabolic process, nonsense-mediated decay	biological_process;molecular_function	PTHR15922	NEUROBLASTOMA AMPLIFIED SEQUENCE NEUROBLASTOMA AMPLIFIED GENE	GO:0003674;GO:0006810;GO:0016192;GO:0009056;GO:0034641;GO:0034655;GO:0048856;GO:0009790	molecular_function;transport;vesicle-mediated transport;catabolic process;cellular nitrogen compound metabolic process;nucleobase-containing compound catabolic process;anatomical structure development;embryo development
ENSONIG00000004527	potassium voltage-gated channel, subfamily H (eag-related), member 8	kcnh8	4.52977	7.0411	-1.54262	-0.625383	2.569	6.94144	0.00842212	0.329618	1	protein_coding	ZDB-GENE-060503-204			GO:0006813;GO:0005249;GO:0005216;GO:0006811;GO:0055085;GO:0016020;GO:0016021;GO:0005244;GO:0034765;GO:0005267;GO:0071805	potassium ion transport;voltage-gated potassium channel activity;ion channel activity;ion transport;transmembrane transport;membrane;integral component of membrane;voltage-gated ion channel activity;regulation of ion transmembrane transport;potassium channel activity;potassium ion transmembrane transport	biological_process;molecular_function;cellular_component	PTHR10217_SF380	POTASSIUM VOLTAGE GATED CHANNEL SUBFAMILY H MEMBER 8 ETHER A GO GO POTASSIUM CHANNEL 3 ELK CHANNEL 3 VOLTAGE GATED POTASSIUM CHANNEL SUBUNIT KV12 1	GO:0005575;GO:0006810;GO:0055085;GO:0022857;GO:0003674	cellular_component;transport;transmembrane transport;transmembrane transporter activity;molecular_function
ENSONIG00000026049			10.4994	15.697	-1.49535	-0.580481	3.72368	6.94387	0.00841069	0.329618	1	lincRNA
ENSONIG00000013549	MAP/microtubule affinity-regulating kinase 2b	mark2b	33.8604	41.898	-1.24072	-0.31118	5.2176	6.90512	0.00859494	0.335639	2	protein_coding	ZDB-GENE-080215-4			GO:0000226;GO:0004674;GO:0006468;GO:0004672;GO:0005524;GO:0030010;GO:0016740;GO:0000166;GO:0016301;GO:0016310	microtubule cytoskeleton organization;protein serine/threonine kinase activity;protein phosphorylation;protein kinase activity;ATP binding;establishment of cell polarity;transferase activity;nucleotide binding;kinase activity;phosphorylation	biological_process;molecular_function	PTHR24346_SF20	SERINE/THREONINE KINASE MARK2 EC_2.7.11.1 EC_2.7.11.- 26 ELKL MOTIF KINASE 1 EMK 1 MAP/MICROTUBULE AFFINITY REGULATING KINASE 2 PAR1 HOMOLOG PAR1 HOMOLOG B PAR 1B	GO:0003674;GO:0043167;GO:0016301;GO:0006464;GO:0007010	molecular_function;ion binding;kinase activity;cellular protein modification process;cytoskeleton organization	04151+2.7.11.1;04150+2.7.11.1;05165+2.7.11.1;04926+2.7.11.1;04714+2.7.11.1;05170+2.7.11.1;05163+2.7.11.1
ENSONIG00000002012	mutY DNA glycosylase	MUTYH	4.25991	2.49501	1.69931	0.764949	1.94173	6.88388	0.00869763	0.337415	1	protein_coding				GO:0051539;GO:0006284;GO:0006281;GO:0003824;GO:0016787;GO:0003677;GO:0046872;GO:0016798;GO:0008152;GO:0006974	4 iron, 4 sulfur cluster binding;base-excision repair;DNA repair;catalytic activity;hydrolase activity;DNA binding;metal ion binding;hydrolase activity, acting on glycosyl bonds;metabolic process;cellular response to DNA damage stimulus	molecular_function;biological_process	PTHR10359_SF24	ADENINE DNA GLYCOSYLASE EC_3.2.2.31 MUTY HOMOLOG	GO:0003674;GO:0003677;GO:0006259;GO:0006950;GO:0034641;GO:0043167;GO:0016798;GO:0008150	molecular_function;DNA binding;DNA metabolic process;response to stress;cellular nitrogen compound metabolic process;ion binding;hydrolase activity, acting on glycosyl bonds;biological_process
ENSONIG00000018967	polybromo 1	pbrm1	70.3102	125.709	-1.78839	-0.838658	6.56586	6.89017	0.00866708	0.337415	2	protein_coding	ZDB-GENE-080926-4		I3KRY5;I3KRY4	GO:0003682;GO:0006338;GO:0005515;GO:0016586;GO:0003677;GO:0005634	chromatin binding;chromatin remodeling;protein binding;RSC-type complex;DNA binding;nucleus	molecular_function;biological_process;cellular_component	PTHR16062_SF10	CHROMATIN STRUCTURE REMODELING COMPLEX SUBUNIT RSC4 RSC COMPLEX SUBUNIT RSC4	GO:0003674;GO:0032991;GO:0005575;GO:0003677;GO:0043226;GO:0005634	molecular_function;protein-containing complex;cellular_component;DNA binding;organelle;nucleus
ENSONIG00000025610			11.0896	1.2578	8.77642	3.13363	2.25376	6.8863	0.0086859	0.337415	2	lincRNA
ENSONIG00000016962	synaptotagmin-2	syt2a	163.456	205.098	-1.25513	-0.327837	7.45861	6.87101	0.00876051	0.339111	1	protein_coding	ZDB-GENE-060503-315	100700879	I3KJU5	GO:0008021;GO:0007269;GO:0005544;GO:0016020;GO:0016021	synaptic vesicle;neurotransmitter secretion;calcium-dependent phospholipid binding;membrane;integral component of membrane	cellular_component;biological_process;molecular_function	PTHR10024_SF208	SYNAPTOTAGMIN 2 SYNAPTOTAGMIN II SYTII	GO:0005575;GO:0003674;GO:0043167;GO:0008289;GO:0006810;GO:0043226;GO:0031410	cellular_component;molecular_function;ion binding;lipid binding;transport;organelle;cytoplasmic vesicle
ENSONIG00000015756	B9 domain containing 1	b9d1	7.60128	5.3786	1.41019	0.495885	2.72594	6.85994	0.00881496	0.340473	1	protein_coding	ZDB-GENE-050522-467	100706858	I3KFD7				PTHR12968_SF1	B9 DOMAIN CONTAINING 1
ENSONIG00000008918	F-box protein 10	fbxo10	47.2587	58.0043	-1.22677	-0.294868	5.75098	6.85368	0.0088459	0.340881	1	protein_coding	ZDB-GENE-090313-270			GO:0005515	protein binding	molecular_function	PTHR22990	F BOX	GO:0003674	molecular_function
ENSONIG00000012991	dual specificity protein kinase CLK4	clk4a	255.038	326.778	-1.28111	-0.357393	8.25431	6.85001	0.00886407	0.340881	2	protein_coding	ZDB-GENE-030131-576	100707848	I3K5E3;I3K5E2	GO:0006468;GO:0004672;GO:0005524;GO:0000166;GO:0004674	protein phosphorylation;protein kinase activity;ATP binding;nucleotide binding;protein serine/threonine kinase activity	biological_process;molecular_function	PTHR24058_SF50	CDC KINASE 4	GO:0003674;GO:0043167;GO:0016301;GO:0006464	molecular_function;ion binding;kinase activity;cellular protein modification process
ENSONIG00000014284	dynein light chain Tctex-type 3	dynlt3 (1 of many)	26.236	20.3859	1.28789	0.365008	4.60953	6.84407	0.00889361	0.341276	1	protein_coding	ZDB-GENE-040927-24	100708458	I3KA11				PTHR21255_SF20	DYNEIN LIGHT CHAIN TCTEX TYPE 3 T COMPLEX ASSOCIATED TESTIS EXPRESSED 1
ENSONIG00000001489	hemoglobin subunit beta-A		649.151	187.058	3.47012	1.79498	8.46346	6.82775	0.00897522	0.341783	1	protein_coding		100704059	I3IZ27	GO:0005833;GO:0015671;GO:0019825;GO:0020037;GO:0046872;GO:0005344	hemoglobin complex;oxygen transport;oxygen binding;heme binding;metal ion binding;oxygen carrier activity	cellular_component;biological_process;molecular_function	PTHR11442_SF7	HEMOGLOBIN SUBUNIT BETA BETA GLOBIN HEMOGLOBIN BETA CHAIN	GO:0003674;GO:0006810;GO:0032991;GO:0005575;GO:0043167	molecular_function;transport;protein-containing complex;cellular_component;ion binding
ENSONIG00000003206	copine family member 9	CPNE9 (1 of many)	59.0652	72.3167	-1.22273	-0.290104	5.96358	6.83089	0.00895946	0.341783	2	protein_coding			I3J581;I3J582				PTHR10857_SF10	COPINE 9 COPINE IX
ENSONIG00000007937	period circadian regulator 2	PER2	117.943	141.044	-1.19645	-0.258759	6.97084	6.82598	0.00898412	0.341783	1	protein_coding				GO:0005515	protein binding	molecular_function	PTHR11269_SF9	PERIOD CIRCADIAN HOMOLOG 2 CIRCADIAN CLOCK PERIOD 2	GO:0003674	molecular_function
ENSONIG00000014381	CD200 receptor 1		4.72065	1.97156	2.39895	1.2624	1.90438	6.83409	0.00894345	0.341783	1	protein_coding		100712133	I3KAD9	GO:0038023;GO:0150077;GO:0016020;GO:0016021	signaling receptor activity;regulation of neuroinflammatory response;membrane;integral component of membrane	molecular_function;biological_process;cellular_component			GO:0003674;GO:0005575	molecular_function;cellular_component
ENSONIG00000008142			0.494724	1.16249	-2.32207	-1.21541	-0.180004	6.80861	0.00907191	0.342179	1	protein_coding							TF641842	UNCHARACTERIZED
ENSONIG00000008413			18.8932	13.3154	1.4178	0.503659	3.9585	6.81805	0.00902408	0.342179	2	protein_coding				GO:0016020;GO:0016021	membrane;integral component of membrane	cellular_component	PTHR16675	CLASS I HISTOCOMPATIBILITY ANTIGEN ALPHA CHAIN PRECURSOR MHC CLASS I ANTIGEN	GO:0005575	cellular_component
ENSONIG00000011856	NHS-like 2	nhsl2	17.75	24.7978	-1.39846	-0.48384	4.39906	6.81077	0.00906098	0.342179	2	protein_coding	ZDB-GENE-130530-951						PTHR23039	NHS
ENSONIG00000016330	CREB-binding protein	crebbpa	40.4475	51.5752	-1.27696	-0.35271	5.51101	6.81175	0.009056	0.342179	2	protein_coding	ZDB-GENE-050208-439	100709989	I3KHG6;I3KHG7	GO:0003713;GO:0016573;GO:0004402;GO:0003712;GO:0008270;GO:0005634;GO:0006355;GO:0005515;GO:0000123;GO:0016740;GO:0046872;GO:0016746;GO:1903508;GO:0002244;GO:0005737	transcription coactivator activity;histone acetylation;histone acetyltransferase activity;transcription coregulator activity;zinc ion binding;nucleus;regulation of transcription, DNA-templated;protein binding;histone acetyltransferase complex;transferase activity;metal ion binding;transferase activity, transferring acyl groups;positive regulation of nucleic acid-templated transcription;hematopoie…	molecular_function;biological_process;cellular_component	PTHR13808_SF5	CREB BINDING EC_2.3.1.48	GO:0003674;GO:0005575;GO:0043226;GO:0005634;GO:0043167;GO:0016746;GO:0006464;GO:0032991;GO:0048856;GO:0030154;GO:0005737	molecular_function;cellular_component;organelle;nucleus;ion binding;transferase activity, transferring acyl groups;cellular protein modification process;protein-containing complex;anatomical structure development;cell differentiation;cytoplasm
ENSONIG00000012087	ryanodine receptor 3	RYR3 (1 of many)	49.4252	65.6365	-1.32859	-0.409899	5.79889	6.80197	0.00910571	0.342291	1	protein_coding			I3K269	GO:0006816;GO:0006874;GO:0005219;GO:0005262;GO:0070588;GO:0005216;GO:0006811;GO:0055085;GO:0016021;GO:0016020;GO:0005515;GO:0005623;GO:0051209	calcium ion transport;cellular calcium ion homeostasis;ryanodine-sensitive calcium-release channel activity;calcium channel activity;calcium ion transmembrane transport;ion channel activity;ion transport;transmembrane transport;integral component of membrane;membrane;protein binding;cell;release of sequestered calcium ion into cytosol	biological_process;molecular_function;cellular_component	PTHR13715_SF16	RYANODINE RECEPTOR 3 RYR 3 RYR3 BRAIN RYANODINE RECEPTOR CALCIUM RELEASE CHANNEL BRAIN TYPE RYANODINE RECEPTOR TYPE 3 RYANODINE RECEPTOR	GO:0003674;GO:0005575;GO:0006810;GO:0055085;GO:0022857;GO:0042592;GO:0005623	molecular_function;cellular_component;transport;transmembrane transport;transmembrane transporter activity;homeostatic process;cell
ENSONIG00000015177			37.5761	46.4898	-1.23702	-0.306866	5.33582	6.79287	0.00915226	0.342291	1	protein_coding				GO:0005891;GO:0070588;GO:0005245;GO:0005515	voltage-gated calcium channel complex;calcium ion transmembrane transport;voltage-gated calcium channel activity;protein binding	cellular_component;biological_process;molecular_function	PTHR11824	VOLTAGE DEPENDENT L TYPE CALCIUM CHANNEL SUBUNIT BETA CALCIUM CHANNEL VOLTAGE DEPENDENT SUBUNIT BETA	GO:0003674;GO:0022857;GO:0006810;GO:0055085;GO:0032991;GO:0005575	molecular_function;transmembrane transporter activity;transport;transmembrane transport;protein-containing complex;cellular_component
ENSONIG00000025415			5.15396	2.18959	2.34627	1.23037	1.85072	6.79571	0.00913774	0.342291	1	lincRNA
ENSONIG00000027023			0.0458866	1.1517	-21.2104	-4.4067	0.00762029	6.79789	0.00912657	0.342291	1	lincRNA
ENSONIG00000000469	MYB proto-oncogene, transcription factor	myb	0.921065	1.88339	-2.06652	-1.0472	0.662305	6.77776	0.00923005	0.342568	2	protein_coding	ZDB-GENE-991110-14	100700889	I3IVF8;I3IVF9	GO:0006355;GO:0003677;GO:0000981;GO:0001654;GO:0006357;GO:0035701;GO:0043009;GO:0045658;GO:0060216;GO:0060271;GO:0000785	regulation of transcription, DNA-templated;DNA binding;DNA-binding transcription factor activity, RNA polymerase II-specific;eye development;regulation of transcription by RNA polymerase II;hematopoietic stem cell migration;chordate embryonic development;regulation of neutrophil differentiation;definitive hemopoiesis;cilium assembly;chromatin	biological_process;molecular_function;cellular_component	PTHR10641_SF454	TRANSCRIPTIONAL ACTIVATOR MYB PROTO ONCOGENE C MYB	GO:0003674;GO:0003677;GO:0003700;GO:0048856;GO:0048870;GO:0040011;GO:0009790;GO:0022607;GO:0005575	molecular_function;DNA binding;DNA-binding transcription factor activity;anatomical structure development;cell motility;locomotion;embryo development;cellular component assembly;cellular_component
ENSONIG00000001554	myocyte enhancer factor 2d	mef2d	40.5839	52.8711	-1.30419	-0.383159	5.49466	6.77743	0.00923177	0.342568	1	protein_coding	ZDB-GENE-990415-164			GO:0045944;GO:0000977;GO:0003677;GO:0046983;GO:0005634;GO:0000976;GO:0030241;GO:0060914	positive regulation of transcription by RNA polymerase II;RNA polymerase II regulatory region sequence-specific DNA binding;DNA binding;protein dimerization activity;nucleus;transcription regulatory region sequence-specific DNA binding;skeletal muscle myosin thick filament assembly;heart formation	biological_process;molecular_function;cellular_component	PTHR11945_SF23	MYOCYTE SPECIFIC ENHANCER FACTOR 2D	GO:0003674;GO:0003677;GO:0005575;GO:0043226;GO:0005634;GO:0007010;GO:0022607;GO:0048856;GO:0065003;GO:0048646	molecular_function;DNA binding;cellular_component;organelle;nucleus;cytoskeleton organization;cellular component assembly;anatomical structure development;protein-containing complex assembly;anatomical structure formation involved in morphogenesis
ENSONIG00000006792	kinesin family member 16B	KIF16B	10.3992	13.8461	-1.33222	-0.413835	3.5964	6.7717	0.00926144	0.342568	2	protein_coding			I3JI77;I3JI78	GO:0007018;GO:0008017;GO:0003777;GO:0035091;GO:0005524;GO:0005515;GO:0000166;GO:0003774	microtubule-based movement;microtubule binding;microtubule motor activity;phosphatidylinositol binding;ATP binding;protein binding;nucleotide binding;motor activity	biological_process;molecular_function	PTHR24115_SF382	KINESIN	GO:0003674;GO:0043167;GO:0008289;GO:0008092	molecular_function;ion binding;lipid binding;cytoskeletal protein binding
ENSONIG00000007588	protein tyrosine phosphatase, receptor type D	PTPRD (1 of many)	293.877	376.87	-1.28249	-0.358943	8.4003	6.76893	0.00927586	0.342568	1	protein_coding			I3JL23	GO:0016791;GO:0016311;GO:0006470;GO:0004725;GO:0005515;GO:0016020;GO:0016021;GO:0016787;GO:0004721;GO:0035335	phosphatase activity;dephosphorylation;protein dephosphorylation;protein tyrosine phosphatase activity;protein binding;membrane;integral component of membrane;hydrolase activity;phosphoprotein phosphatase activity;peptidyl-tyrosine dephosphorylation	molecular_function;biological_process;cellular_component	PTHR19134_SF204	RECEPTOR TYPE TYROSINE PHOSPHATASE S PRECURSOR R PTP S EC_3.1.3.48 RECEPTOR TYPE TYROSINE PHOSPHATASE SIGMA R PTP SIGMA	GO:0003674;GO:0016791;GO:0006464;GO:0005575	molecular_function;phosphatase activity;cellular protein modification process;cellular_component
ENSONIG00000009325	protein CYR61		13.4559	21.3078	-1.58168	-0.661458	4.00888	6.77557	0.00924139	0.342568	1	protein_coding		100693308	I3JS76	GO:0005520;GO:0005576;GO:0005515	insulin-like growth factor binding;extracellular region;protein binding	molecular_function;cellular_component	PTHR11348_SF18	CYR61 PRECURSOR CCN FAMILY MEMBER 1 CYSTEINE RICH ANGIOGENIC INDUCER 61 INSULIN GROWTH FACTOR BINDING 10 IBP 10 IGF BINDING 10 IGFBP 10	GO:0003674;GO:0005575;GO:0005576	molecular_function;cellular_component;extracellular region
ENSONIG00000019149	inositol 1,4,5-trisphosphate receptor, type 1a	itpr1a	10.6715	15.2054	-1.42235	-0.508274	3.87608	6.7705	0.00926769	0.342568	1	protein_coding	ZDB-GENE-070604-3			GO:0005783;GO:0006816;GO:0005262;GO:0070588;GO:0005216;GO:0006811;GO:0055085;GO:0016020;GO:0070679;GO:0005220;GO:0016021;GO:0048016	endoplasmic reticulum;calcium ion transport;calcium channel activity;calcium ion transmembrane transport;ion channel activity;ion transport;transmembrane transport;membrane;inositol 1,4,5 trisphosphate binding;inositol 1,4,5-trisphosphate-sensitive calcium-release channel activity;integral component of membrane;inositol phosphate-mediated signaling	cellular_component;biological_process;molecular_function	PTHR13715_SF52	INOSITOL 1 4 5 TRISPHOSPHATE RECEPTOR TYPE 1 IP3 RECEPTOR 1 IP3R 1 INS TYPE 1 INOSITOL 1 4 5 TRISPHOSPHATE RECEPTOR TYPE 1 INSP3 RECEPTOR	GO:0005575;GO:0006810;GO:0055085;GO:0022857;GO:0003674;GO:0043226;GO:0005783;GO:0043167;GO:0007165	cellular_component;transport;transmembrane transport;transmembrane transporter activity;molecular_function;organelle;endoplasmic reticulum;ion binding;signal transduction
ENSONIG00000001330	dispatched RND transporter family member 1	disp1	22.0227	28.6226	-1.30001	-0.378524	4.62799	6.69567	0.00966473	0.344696	1	protein_coding	ZDB-GENE-030911-7	100711274	I3IYJ0	GO:0016021;GO:0016020	integral component of membrane;membrane	cellular_component	PTHR10796_SF115	DISPATCHED HOMOLOG 1	GO:0005575	cellular_component
ENSONIG00000001504	hemoglobin subunit alpha-B	si:ch211-5k11.8	635.554	170.297	3.7318	1.89987	8.37974	6.73314	0.0094638	0.344696	1	protein_coding	ZDB-GENE-131121-640	102080222	I3IZ43	GO:0005833;GO:0015671;GO:0019825;GO:0020037;GO:0046872;GO:0005344	hemoglobin complex;oxygen transport;oxygen binding;heme binding;metal ion binding;oxygen carrier activity	cellular_component;biological_process;molecular_function	PTHR11442_SF10	HEMOGLOBIN SUBUNIT ALPHA ALPHA GLOBIN HEMOGLOBIN ALPHA CHAIN	GO:0003674;GO:0006810;GO:0032991;GO:0005575;GO:0043167	molecular_function;transport;protein-containing complex;cellular_component;ion binding
ENSONIG00000003956	proteasome subunit beta 4	psmb4	164.442	133.65	1.2305	0.299246	7.14418	6.70417	0.00961879	0.344696	1	protein_coding	ZDB-GENE-050417-333			GO:0004175;GO:0005839;GO:0051603;GO:0004298;GO:0005634;GO:0005737;GO:0008233;GO:0016787;GO:0006508;GO:0000502	endopeptidase activity;proteasome core complex;proteolysis involved in cellular protein catabolic process;threonine-type endopeptidase activity;nucleus;cytoplasm;peptidase activity;hydrolase activity;proteolysis;proteasome complex	molecular_function;cellular_component;biological_process	PTHR11599_SF5	PROTEASOME SUBUNIT BETA TYPE 4 PRECURSOR EC_3.4.25.1 MACROPAIN BETA CHAIN MULTICATALYTIC ENDOPEPTIDASE COMPLEX BETA CHAIN PROTEASOME BETA CHAIN PROTEASOME CHAIN 3	GO:0032991;GO:0005575;GO:0008233;GO:0043226;GO:0005634;GO:0005737	protein-containing complex;cellular_component;peptidase activity;organelle;nucleus;cytoplasm
ENSONIG00000004107	RNA binding motif protein 5	rbm5	547.202	669.874	-1.22409	-0.291707	9.25139	6.73146	0.00947269	0.344696	2	protein_coding	ZDB-GENE-030131-3022	100707900	I3J8I7;I3J8I6	GO:0008380;GO:0005681;GO:0042981;GO:0003676;GO:0000381;GO:0046872;GO:0003723	RNA splicing;spliceosomal complex;regulation of apoptotic process;nucleic acid binding;regulation of alternative mRNA splicing, via spliceosome;metal ion binding;RNA binding	biological_process;cellular_component;molecular_function	PTHR13948_SF21	RNA BINDING 5 RNA BINDING MOTIF 5	GO:0003674;GO:0032991;GO:0005575;GO:0034641;GO:0043167;GO:0003723	molecular_function;protein-containing complex;cellular_component;cellular nitrogen compound metabolic process;ion binding;RNA binding
ENSONIG00000006120	FAST kinase domain-containing protein 3, mitochondrial	fastkd3	19.7606	14.1352	1.39855	0.483936	4.04011	6.71353	0.0095684	0.344696	1	protein_coding	ZDB-GENE-050208-273	100710732	I3JFS1	GO:0004672;GO:0006468	protein kinase activity;protein phosphorylation	molecular_function;biological_process	PTHR21228	FAST KINASE DOMAIN CONTAINING PRECURSOR	GO:0016301;GO:0006464	kinase activity;cellular protein modification process
ENSONIG00000007082	solute carrier family 6 member 3	slc6a3	47.3925	36.2545	1.30733	0.38662	5.4343	6.70234	0.00962865	0.344696	2	protein_coding	ZDB-GENE-010316-1	100706735	I3JJ92;I3JJ93	GO:0005328;GO:0016021;GO:0016020;GO:0055085;GO:0015293;GO:0006836;GO:0005887;GO:0005330;GO:0090494	neurotransmitter:sodium symporter activity;integral component of membrane;membrane;transmembrane transport;symporter activity;neurotransmitter transport;integral component of plasma membrane;dopamine:sodium symporter activity;dopamine uptake	molecular_function;cellular_component;biological_process	PTHR11616_SF38	SODIUM DEPENDENT DOPAMINE TRANSPORTER DA TRANSPORTER DAT SOLUTE CARRIER FAMILY 6 MEMBER 3	GO:0005575;GO:0022857;GO:0003674;GO:0006810;GO:0055085	cellular_component;transmembrane transporter activity;molecular_function;transport;transmembrane transport
ENSONIG00000007542	zeta-sarcoglycan		10.5886	14.8109	-1.39421	-0.479452	3.63084	6.69636	0.00966099	0.344696	2	protein_coding		100690306	I3JKW8;I3JKW7	GO:0016012;GO:0016021;GO:0016020	sarcoglycan complex;integral component of membrane;membrane	cellular_component	PTHR12939_SF5	ZETA SARCOGLYCAN ZETA SG ZSG1	GO:0005575;GO:0032991	cellular_component;protein-containing complex
ENSONIG00000010120	methylsterol monooxygenase 1	msmo1	43.3358	53.0411	-1.22411	-0.291735	5.50502	6.73804	0.00943781	0.344696	2	protein_coding	ZDB-GENE-040426-2670			GO:0005506;GO:0055114;GO:0016491;GO:0008610;GO:0016020;GO:0016021	iron ion binding;oxidation-reduction process;oxidoreductase activity;lipid biosynthetic process;membrane;integral component of membrane	molecular_function;biological_process;cellular_component	PTHR11863_SF22	METHYLSTEROL MONOOXYGENASE EC_1.14.18.9 C 4 METHYLSTEROL OXIDASE	GO:0016491;GO:0003674;GO:0043167;GO:0009058;GO:0006629;GO:0005575	oxidoreductase activity;molecular_function;ion binding;biosynthetic process;lipid metabolic process;cellular_component
ENSONIG00000010997	WD repeat-containing protein 78	wdr78	13.2351	17.5684	-1.3228	-0.403596	3.91937	6.73164	0.00947175	0.344696	2	protein_coding	ZDB-GENE-050522-322	100702771	I3JY95;I3JY94	GO:0005515	protein binding	molecular_function	PTHR12442_SF12	WD REPEAT CONTAINING 78	GO:0003674	molecular_function
ENSONIG00000012079	neuron navigator 3	nav3	129.598	156.509	-1.20794	-0.272547	7.14991	6.71525	0.00955921	0.344696	2	protein_coding	ZDB-GENE-021205-1			GO:0005524;GO:0005515;GO:0022008;GO:0003779;GO:0031016;GO:0072576;GO:0005794;GO:0030027;GO:0030175	ATP binding;protein binding;neurogenesis;actin binding;pancreas development;liver morphogenesis;Golgi apparatus;lamellipodium;filopodium	molecular_function;biological_process;cellular_component	PTHR12784_SF18	NEURON NAVIGATOR 3 PORE MEMBRANE AND/OR FILAMENT INTERACTING 1	GO:0003674;GO:0043167;GO:0030154;GO:0008092;GO:0048856;GO:0005575;GO:0043226;GO:0005794	molecular_function;ion binding;cell differentiation;cytoskeletal protein binding;anatomical structure development;cellular_component;organelle;Golgi apparatus
ENSONIG00000012921	ATPase phospholipid transporting 10B	atp10b	0.776852	2.15714	-2.72056	-1.44391	0.667617	6.70858	0.00959499	0.344696	1	protein_coding	ZDB-GENE-130530-796			GO:0004012;GO:0015914;GO:0000287;GO:0000166;GO:0016021;GO:0005524;GO:0016020;GO:0045332	phospholipid-translocating ATPase activity;phospholipid transport;magnesium ion binding;nucleotide binding;integral component of membrane;ATP binding;membrane;phospholipid translocation	molecular_function;biological_process;cellular_component	PTHR24092_SF42	PROBABLE PHOSPHOLIPID TRANSPORTING ATPASE VB EC_7.6.2.1 ATPASE CLASS V TYPE 10B P4 ATPASE FLIPPASE COMPLEX ALPHA SUBUNIT ATP10B	GO:0003674;GO:0043167;GO:0005575;GO:0006810;GO:0016887;GO:0061024	molecular_function;ion binding;cellular_component;transport;ATPase activity;membrane organization
ENSONIG00000014123	cyclin dependent kinase 8	cdk8	16.6782	23.3034	-1.39912	-0.484525	4.24819	6.71741	0.0095476	0.344696	1	protein_coding	ZDB-GENE-030903-2	100702888	I3K9G2	GO:0006468;GO:0004672;GO:0005524;GO:0000166;GO:0004674	protein phosphorylation;protein kinase activity;ATP binding;nucleotide binding;protein serine/threonine kinase activity	biological_process;molecular_function	PTHR24056_SF162	CYCLIN DEPENDENT KINASE 8 EC_2.7.11.22 EC_2.7.11.- 23 CELL DIVISION KINASE 8 MEDIATOR COMPLEX SUBUNIT CDK8 MEDIATOR OF RNA POLYMERASE II TRANSCRIPTION SUBUNIT CDK8	GO:0003674;GO:0043167;GO:0016301;GO:0006464	molecular_function;ion binding;kinase activity;cellular protein modification process
ENSONIG00000015825	cytohesin 1b	cyth1b	7.04783	10.0916	-1.4322	-0.518234	3.11946	6.71092	0.0095824	0.344696	1	protein_coding	ZDB-GENE-030131-4311			GO:0032012;GO:0005086;GO:0055113	regulation of ARF protein signal transduction;ARF guanyl-nucleotide exchange factor activity;epiboly involved in gastrulation with mouth forming second	biological_process;molecular_function	PTHR10663_SF113	CYTOHESIN 1 PH SEC7 AND COILED COIL DOMAIN CONTAINING 1 SEC7 HOMOLOG 1	GO:0003674	molecular_function
ENSONIG00000018069			3.74777	2.41991	1.54419	0.626851	1.78966	6.73556	0.00945095	0.344696	1	protein_coding				GO:0004308	exo-alpha-sialidase activity	molecular_function	PTHR10628	SIALIDASE EC_3.2.1.18 SIALIDASE N ACETYL ALPHA NEURAMINIDASE	GO:0016798	hydrolase activity, acting on glycosyl bonds	00600+3.2.1.18;00511+3.2.1.18
ENSONIG00000018669	pinopsin		6.15907	3.94105	1.57047	0.651201	2.39135	6.71019	0.00958638	0.344696	1	protein_coding		100702032	I3KQV6	GO:0007601;GO:0016021;GO:0007186;GO:0004930;GO:0016020;GO:0009881;GO:0007165;GO:0007602;GO:0018298;GO:0050896	visual perception;integral component of membrane;G protein-coupled receptor signaling pathway;G protein-coupled receptor activity;membrane;photoreceptor activity;signal transduction;phototransduction;protein-chromophore linkage;response to stimulus	biological_process;cellular_component;molecular_function	PTHR24240	OPSIN	GO:0003674;GO:0007165;GO:0005575;GO:0050877;GO:0006464;GO:0008150	molecular_function;signal transduction;cellular_component;nervous system process;cellular protein modification process;biological_process
ENSONIG00000019977	ring finger protein 157	si:dkey-49c17.3	39.4573	48.0198	-1.21971	-0.286541	5.47048	6.75208	0.00936382	0.344696	1	protein_coding	ZDB-GENE-130531-49		I3KVL2				PTHR22996	E3 UBIQUITIN LIGASE MGRN1 EC_2.3.2.27 MAHOGUNIN RING FINGER 1 RING TYPE E3 UBIQUITIN TRANSFERASE MGRN1
ENSONIG00000025614			9.12888	13.4458	-1.47882	-0.564447	3.47191	6.71959	0.00953598	0.344696	1	lincRNA
ENSONIG00000007296	zinc finger protein 516	ZNF516	10.3292	14.5244	-1.41157	-0.497306	3.60732	6.67244	0.00979148	0.347725	2	protein_coding		100701904	I3JK07;I3JK08	GO:0003676	nucleic acid binding	molecular_function	PTHR23233_SF3	ZINC FINGER 516	GO:0003674	molecular_function
ENSONIG00000007536			37.1755	24.7116	1.50578	0.590508	5.10861	6.66588	0.0098276	0.347725	1	protein_coding				GO:0005515;GO:0016020;GO:0016021	protein binding;membrane;integral component of membrane	molecular_function;cellular_component	PTHR24100_SF15	BUTYROPHILIN SUBFAMILY MEMBER	GO:0003674;GO:0005575	molecular_function;cellular_component
ENSONIG00000010493	ATP-binding cassette, sub-family C (CFTR/MRP), member 8	abcc8	36.685	47.2189	-1.28816	-0.365308	5.36356	6.67436	0.00978094	0.347725	1	protein_coding	ZDB-GENE-050517-22			GO:0006813;GO:0042626;GO:0016887;GO:0055085;GO:0016021;GO:0005524;GO:0016020;GO:0008281;GO:0000166	potassium ion transport;ATPase activity, coupled to transmembrane movement of substances;ATPase activity;transmembrane transport;integral component of membrane;ATP binding;membrane;sulfonylurea receptor activity;nucleotide binding	biological_process;molecular_function;cellular_component	PTHR24223_SF187	ATP BINDING CASSETTE SUB FAMILY C MEMBER 8 SULFONYLUREA RECEPTOR 1	GO:0005575;GO:0003674;GO:0043167;GO:0006810;GO:0055085;GO:0016887;GO:0022857	cellular_component;molecular_function;ion binding;transport;transmembrane transport;ATPase activity;transmembrane transporter activity
ENSONIG00000017677	phosphatidylinositol 4-kinase type 2 alpha	pi4k2a	46.0459	38.3519	1.20061	0.263767	5.35028	6.66576	0.00982828	0.347725	1	protein_coding	ZDB-GENE-040426-2675	100704826	I3KME4	GO:0004430;GO:0046854	1-phosphatidylinositol 4-kinase activity;phosphatidylinositol phosphorylation	molecular_function;biological_process	PTHR12865	PHOSPHATIDYLINOSITOL 4 KINASE TYPE 2 EC_2.7.1.67 PHOSPHATIDYLINOSITOL 4 KINASE TYPE II	GO:0016301;GO:0006629	kinase activity;lipid metabolic process	00562+2.7.1.67;04070+2.7.1.67
ENSONIG00000003707	grainyhead like transcription factor 1	grhl1	14.0155	18.2851	-1.30041	-0.378969	4.15689	6.61771	0.010097	0.352366	1	protein_coding	ZDB-GENE-030131-3665	100700398	I3J722	GO:0006357;GO:0003700;GO:0002934;GO:0008544;GO:0048839;GO:0090504;GO:0005737	regulation of transcription by RNA polymerase II;DNA-binding transcription factor activity;desmosome organization;epidermis development;inner ear development;epiboly;cytoplasm	biological_process;molecular_function;cellular_component	PTHR11037_SF16	GRAINYHEAD 1 HOMOLOG TRANSCRIPTION FACTOR CP2 2 TRANSCRIPTION FACTOR LBP 32	GO:0003674;GO:0003700;GO:0034330;GO:0048856;GO:0005575;GO:0005737	molecular_function;DNA-binding transcription factor activity;cell junction organization;anatomical structure development;cellular_component;cytoplasm
ENSONIG00000008605	actin binding LIM protein family member 3	ABLIM3 (1 of many)	40.2736	48.8245	-1.21255	-0.278039	5.49929	6.61831	0.0100935	0.352366	2	protein_coding			I3JPM5;I3JPM6	GO:0007010;GO:0030036;GO:0006351;GO:0003779;GO:0046872	cytoskeleton organization;actin cytoskeleton organization;transcription, DNA-templated;actin binding;metal ion binding	biological_process;molecular_function	PTHR24213	ACTIN BINDING LIM ABLIM ACTIN BINDING LIM FAMILY MEMBER	GO:0003674;GO:0008092;GO:0009058;GO:0034641;GO:0007010;GO:0043167	molecular_function;cytoskeletal protein binding;biosynthetic process;cellular nitrogen compound metabolic process;cytoskeleton organization;ion binding
ENSONIG00000016179	catechol O-methyltransferase domain-containing protein 1	COMTD1 (1 of many)	54.0008	43.7406	1.23494	0.304443	5.60691	6.62097	0.0100785	0.352366	2	protein_coding		100700628	I3KGY0;I3KGY1	GO:0008171;GO:0032259;GO:0016020;GO:0016021	O-methyltransferase activity;methylation;membrane;integral component of membrane	molecular_function;biological_process;cellular_component	PTHR10509_SF14	CATECHOL O METHYLTRANSFERASE DOMAIN CONTAINING 1 EC_2.1.1.-	GO:0008168;GO:0005575	methyltransferase activity;cellular_component
ENSONIG00000019199	matrix metallopeptidase 19	mmp19	6.29871	11.2881	-1.78856	-0.838797	3.10391	6.61737	0.0100989	0.352366	1	protein_coding	ZDB-GENE-100308-3	100710918	I3KSS1	GO:0031012;GO:0004222;GO:0008237;GO:0008270;GO:0006508;GO:0008233;GO:0016787;GO:0046872	extracellular matrix;metalloendopeptidase activity;metallopeptidase activity;zinc ion binding;proteolysis;peptidase activity;hydrolase activity;metal ion binding	cellular_component;molecular_function;biological_process	PTHR10201_SF117	MATRIX METALLOPROTEINASE 19 PRECURSOR MMP 19 EC_3.4.24.- MATRIX METALLOPROTEINASE RASI	GO:0003674;GO:0043167;GO:0008233;GO:0005575;GO:0031012	molecular_function;ion binding;peptidase activity;cellular_component;extracellular matrix
ENSONIG00000020087			27.2434	6.35408	4.2857	2.09953	4.48869	6.63096	0.0100221	0.352366	1	protein_coding				GO:0008305;GO:0007155;GO:0016020;GO:0016021;GO:0007229	integrin complex;cell adhesion;membrane;integral component of membrane;integrin-mediated signaling pathway	cellular_component;biological_process	PTHR23220_SF17	INTEGRIN ALPHA X PRECURSOR CD11 ANTIGEN FAMILY MEMBER C LEUKOCYTE ADHESION GLYCOPROTEIN P150 95 ALPHA CHAIN LEUKOCYTE ADHESION RECEPTOR P150 95 CD11C ANTIGEN	GO:0007155;GO:0032991;GO:0005575;GO:0007165	cell adhesion;protein-containing complex;cellular_component;signal transduction
ENSONIG00000020542	potassium voltage-gated channel subfamily A member 2	KCNA2 (1 of many)	12.0592	15.9216	-1.32194	-0.402654	3.77	6.63377	0.0100064	0.352366	1	protein_coding		100695486	I3KXK1	GO:0008076;GO:0006813;GO:0005249;GO:0051260;GO:0005216;GO:0006811;GO:0055085;GO:0016020;GO:0005515;GO:0016021;GO:0005244;GO:0034765;GO:0005267;GO:0071805	voltage-gated potassium channel complex;potassium ion transport;voltage-gated potassium channel activity;protein homooligomerization;ion channel activity;ion transport;transmembrane transport;membrane;protein binding;integral component of membrane;voltage-gated ion channel activity;regulation of ion transmembrane transport;potassium channel activity;potassium ion transmembrane transport	cellular_component;biological_process;molecular_function	PTHR11537_SF23	POTASSIUM VOLTAGE GATED CHANNEL SUBFAMILY A MEMBER 2 VOLTAGE GATED POTASSIUM CHANNEL SUBUNIT KV1 2	GO:0003674;GO:0005575;GO:0006810;GO:0055085;GO:0022857;GO:0022607;GO:0065003;GO:0032991	molecular_function;cellular_component;transport;transmembrane transport;transmembrane transporter activity;cellular component assembly;protein-containing complex assembly;protein-containing complex
ENSONIG00000026794			1.63274	0.817291	2.01181	1.00849	0.567093	6.61784	0.0100962	0.352366	1	lincRNA
ENSONIG00000003739	sodium/potassium-transporting ATPase subunit beta-233	atp1b1b	84.1199	55.8361	1.50781	0.59245	6.22925	6.60971	0.0101424	0.352684	1	protein_coding	ZDB-GENE-001127-4	100694365	I3J761	GO:0005890;GO:0006814;GO:0006813;GO:0016020;GO:0016021;GO:0006811	sodium:potassium-exchanging ATPase complex;sodium ion transport;potassium ion transport;membrane;integral component of membrane;ion transport	cellular_component;biological_process	PTHR11523	SODIUM/POTASSIUM TRANSPORTING ATPASE SUBUNIT BETA SODIUM/POTASSIUM DEPENDENT ATPASE SUBUNIT BETA	GO:0006810;GO:0032991;GO:0005575	transport;protein-containing complex;cellular_component
ENSONIG00000011321			94.454	112.008	-1.18655	-0.246773	6.74106	6.60875	0.0101479	0.352684	1	protein_coding				GO:0045216	cell-cell junction organization	biological_process	PTHR21517	APICAL JUNCTION COMPONENT 1 HOMOLOG	GO:0034330	cell junction organization
ENSONIG00000001716	WD repeat domain 6	wdr6	4.02844	2.33093	1.731	0.791605	1.78701	6.58579	0.0102796	0.3531	1	protein_coding	ZDB-GENE-081104-368			GO:0005515	protein binding	molecular_function	PTHR14344	WD REPEAT CONTAINING	GO:0003674	molecular_function
ENSONIG00000004390	complement C1q subcomponent subunit C		21.559	16.557	1.30026	0.378804	4.13753	6.58607	0.010278	0.3531	2	protein_coding		100692629	I3J9I5;I3J9I6	GO:0005515	protein binding	molecular_function	PTHR24022_SF17	COMPLEMENT C1Q SUBCOMPONENT SUBUNIT C PRECURSOR	GO:0003674	molecular_function
ENSONIG00000009776	ubiquitin specific peptidase 15	USP15	24.1478	30.5719	-1.26478	-0.33889	4.87644	6.58923	0.0102598	0.3531	1	protein_coding		100702178	I3JTT7	GO:0004843;GO:0006511;GO:0016579;GO:0036459	thiol-dependent ubiquitin-specific protease activity;ubiquitin-dependent protein catabolic process;protein deubiquitination;thiol-dependent ubiquitinyl hydrolase activity	molecular_function;biological_process	PTHR24006_SF387	UBIQUITIN CARBOXYL TERMINAL HYDROLASE 15 EC_3.4.19.12 DEUBIQUITINATING ENZYME 15 UBIQUITIN THIOESTERASE 15 UBIQUITIN SPECIFIC PROCESSING PROTEASE 15	GO:0006464;GO:0009056	cellular protein modification process;catabolic process
ENSONIG00000016692	limbic system associated membrane protein	LSAMP	199.953	160.851	1.24337	0.31426	7.59722	6.58589	0.010279	0.3531	1	protein_coding			I3KIT4				PTHR19831_SF10	LIMBIC SYSTEM ASSOCIATED MEMBRANE PRECURSOR
ENSONIG00000020175	si:dkey-1f12.3	si:dkey-1f12.3	30.3764	38.8831	-1.28098	-0.357248	5.13478	6.5943	0.0102306	0.3531	1	protein_coding	ZDB-GENE-030131-1677			GO:0005515	protein binding	molecular_function	PTHR13720_SF16	ECHINODERM MICROTUBULE ASSOCIATED 5 EMAP 5	GO:0003674	molecular_function
ENSONIG00000022562			8.54278	11.8167	-1.38653	-0.471483	3.26927	6.5983	0.0102076	0.3531	1	lincRNA
ENSONIG00000005002	leucine-rich repeat and fibronectin type III domain-containing protein 1-like protein	zgc:172282	27.1577	34.9707	-1.28759	-0.364674	4.99937	6.5717	0.0103613	0.353693	1	protein_coding	ZDB-GENE-080219-38	100696252	I3JBQ2	GO:0005515;GO:0016020;GO:0016021	protein binding;membrane;integral component of membrane	molecular_function;cellular_component	PTHR24373_SF1	LEUCINE RICH REPEAT AND FIBRONECTIN TYPE III DOMAIN CONTAINING 3 PRECURSOR SYNAPTIC ADHESION MOLECULE 4	GO:0003674;GO:0005575	molecular_function;cellular_component
ENSONIG00000005022			0.547791	1.41965	-2.49584	-1.31952	-0.00706015	6.56903	0.0103769	0.353693	1	protein_coding
ENSONIG00000013314	biogenesis of lysosomal organelles complex 1 subunit 6	bloc1s6	23.3519	18.6213	1.25444	0.327044	4.40569	6.57214	0.0103588	0.353693	1	protein_coding	ZDB-GENE-070112-1862	100693914	I3K6J9				PTHR31328	BIOGENESIS OF LYSOSOME RELATED ORGANELLES COMPLEX 1 SUBUNIT 6 BLOC 1 SUBUNIT 6 PALLID
ENSONIG00000015188	cathepsin H	ctsh	28.9014	22.3463	1.29121	0.368726	4.68875	6.57586	0.0103371	0.353693	2	protein_coding	ZDB-GENE-030131-3539	100708413	I3KDC2;I3KDC3	GO:0008234;GO:0006508;GO:0008233;GO:0016787	cysteine-type peptidase activity;proteolysis;peptidase activity;hydrolase activity	molecular_function;biological_process	PTHR12411_SF101	PRO CATHEPSIN H CATHEPSIN H MINI CHAIN; CATHEPSIN H EC_3.4.22.16 ; CATHEPSIN H HEAVY CHAIN; CATHEPSIN H LIGHT CHAIN]	GO:0008233	peptidase activity
ENSONIG00000001067	B-cell lymphoma/leukemia 11B	im:7142702	5.15047	3.21543	1.59768	0.675976	1.87131	6.5547	0.0104608	0.354504	2	protein_coding	ZDB-GENE-050411-48	100703242	I3IXL3;I3IXL4	GO:0003676	nucleic acid binding	molecular_function	PTHR23233_SF44	B CELL CLL/LYMPHOMA 11B ZINC FINGER FRAGMENT	GO:0003674	molecular_function
ENSONIG00000020771	potassium voltage-gated channel subfamily A member 1	kcna1b	41.3455	51.042	-1.23302	-0.302201	5.51304	6.55486	0.0104598	0.354504	1	protein_coding	ZDB-GENE-140515-1	100706932	I3KY79	GO:0008076;GO:0006813;GO:0005249;GO:0051260;GO:0005216;GO:0006811;GO:0055085;GO:0016020;GO:0005515;GO:0016021;GO:0005244;GO:0034765;GO:0005267;GO:0071805	voltage-gated potassium channel complex;potassium ion transport;voltage-gated potassium channel activity;protein homooligomerization;ion channel activity;ion transport;transmembrane transport;membrane;protein binding;integral component of membrane;voltage-gated ion channel activity;regulation of ion transmembrane transport;potassium channel activity;potassium ion transmembrane transport	cellular_component;biological_process;molecular_function	PTHR11537_SF24	POTASSIUM VOLTAGE GATED CHANNEL SUBFAMILY A MEMBER 1 VOLTAGE GATED POTASSIUM CHANNEL SUBUNIT KV1 1	GO:0003674;GO:0005575;GO:0006810;GO:0055085;GO:0022857;GO:0022607;GO:0065003;GO:0032991	molecular_function;cellular_component;transport;transmembrane transport;transmembrane transporter activity;cellular component assembly;protein-containing complex assembly;protein-containing complex
ENSONIG00000023574			3.96178	2.1376	1.85965	0.895028	1.82598	6.55956	0.0104322	0.354504	1	lincRNA
ENSONIG00000001339	myristoylated alanine-rich C-kinase substrate	marcksb	339.355	277.037	1.22487	0.292627	8.26529	6.54255	0.0105324	0.35569	1	protein_coding	ZDB-GENE-030131-1921	100709686	I3IYK0	GO:0005516;GO:0003381;GO:0003407;GO:0007369;GO:0007417;GO:0007420;GO:0010842;GO:0035914;GO:0051216;GO:0060027;GO:0060541	calmodulin binding;epithelial cell morphogenesis involved in gastrulation;neural retina development;gastrulation;central nervous system development;brain development;retina layer formation;skeletal muscle cell differentiation;cartilage development;convergent extension involved in gastrulation;respiratory system development	molecular_function;biological_process	PTHR14353_SF8	MYRISTOYLATED ALANINE RICH C KINASE SUBSTRATE MARCKS KINASE C SUBSTRATE 80 KDA	GO:0003674;GO:0000902;GO:0048856;GO:0048646;GO:0030154	molecular_function;cell morphogenesis;anatomical structure development;anatomical structure formation involved in morphogenesis;cell differentiation
ENSONIG00000010719	LIM/homeobox protein Lhx6	si:ch211-236k19.2	18.9483	14.2572	1.33284	0.414503	4.05109	6.54169	0.0105375	0.35569	1	protein_coding	ZDB-GENE-060531-41	100700223	I3JX82	GO:0043565;GO:0006355;GO:0003677;GO:0005634;GO:0046872	sequence-specific DNA binding;regulation of transcription, DNA-templated;DNA binding;nucleus;metal ion binding	molecular_function;biological_process;cellular_component	PTHR24208_SF10	LIM/HOMEOBOX LHX6 LIM HOMEOBOX 6 LIM/HOMEOBOX LHX6 1	GO:0003674;GO:0003677;GO:0005575;GO:0043226;GO:0005634;GO:0043167	molecular_function;DNA binding;cellular_component;organelle;nucleus;ion binding
ENSONIG00000018014	serine hydrolase-like	serhl (1 of many)	0.46427	1.15541	-2.54588	-1.34817	-0.192761	6.53856	0.0105561	0.35569	1	protein_coding	ZDB-GENE-030131-1368						PTHR10992_SF701	SERINE HYDROLASE EC_3.1.-.-
ENSONIG00000014495	zinc finger homeobox 4	zfhx4	93.9929	122.469	-1.30337	-0.382249	6.74749	6.52182	0.0106559	0.357691	1	protein_coding	ZDB-GENE-070530-3			GO:0008270;GO:0043565;GO:0003676;GO:0006355;GO:0003677;GO:0005634;GO:0046872	zinc ion binding;sequence-specific DNA binding;nucleic acid binding;regulation of transcription, DNA-templated;DNA binding;nucleus;metal ion binding	molecular_function;biological_process;cellular_component	PTHR24208_SF40	ZINC FINGER HOMEOBOX 4 ZINC FINGER HOMEODOMAIN 4 ZFH 4	GO:0003674;GO:0003677;GO:0043167;GO:0005575;GO:0043226;GO:0005634	molecular_function;DNA binding;ion binding;cellular_component;organelle;nucleus
ENSONIG00000023541			1.30193	0.580192	2.198	1.13619	0.0485328	6.52193	0.0106552	0.357691	1	lincRNA
ENSONIG00000006390	carbonic anhydrase 14	ca14	80.0669	65.5336	1.22186	0.28908	6.13626	6.49718	0.0108045	0.359271	2	protein_coding	ZDB-GENE-051030-57	100708989	I3JGR3;I3JGR4	GO:0008270;GO:0004089;GO:0016020;GO:0016021	zinc ion binding;carbonate dehydratase activity;membrane;integral component of membrane	molecular_function;cellular_component	PTHR18952_SF84	CARBONIC ANHYDRASE 14 PRECURSOR EC_4.2.1.1 CARBONATE DEHYDRATASE XIV CARBONIC ANHYDRASE XIV CA XIV	GO:0003674;GO:0043167;GO:0016829;GO:0005575	molecular_function;ion binding;lyase activity;cellular_component	00910+4.2.1.1
ENSONIG00000008483	nuclear receptor subfamily 3 group C member 1	NR3C1 (1 of many)	67.8114	81.2055	-1.19787	-0.260474	6.2265	6.49951	0.0107904	0.359271	1	protein_coding		100534588	I3JP68	GO:0005496;GO:0003707;GO:0008270;GO:0043565;GO:0003700;GO:0005634;GO:0006355;GO:0003677;GO:0004883;GO:0042921;GO:0043402;GO:0046872	steroid binding;steroid hormone receptor activity;zinc ion binding;sequence-specific DNA binding;DNA-binding transcription factor activity;nucleus;regulation of transcription, DNA-templated;DNA binding;glucocorticoid receptor activity;glucocorticoid receptor signaling pathway;glucocorticoid mediated signaling pathway;metal ion binding	molecular_function;cellular_component;biological_process	PTHR24084_SF4	GLUCOCORTICOID RECEPTOR GR NUCLEAR RECEPTOR SUBFAMILY 3 GROUP C MEMBER 1	GO:0003674;GO:0003677;GO:0005575;GO:0043226;GO:0005634;GO:0003700;GO:0043167;GO:0008289;GO:0007165	molecular_function;DNA binding;cellular_component;organelle;nucleus;DNA-binding transcription factor activity;ion binding;lipid binding;signal transduction
ENSONIG00000008892	potassium voltage-gated channel subfamily H member 7	KCNH7	40.1342	51.5473	-1.28419	-0.36086	5.61235	6.5044	0.0107608	0.359271	1	protein_coding			I3JQN2	GO:0006813;GO:0005249;GO:0005216;GO:0006811;GO:0055085;GO:0016020;GO:0016021;GO:0005244;GO:0034765;GO:0005267;GO:0071805	potassium ion transport;voltage-gated potassium channel activity;ion channel activity;ion transport;transmembrane transport;membrane;integral component of membrane;voltage-gated ion channel activity;regulation of ion transmembrane transport;potassium channel activity;potassium ion transmembrane transport	biological_process;molecular_function;cellular_component	PTHR10217_SF466	POTASSIUM VOLTAGE GATED CHANNEL SUBFAMILY H MEMBER 7 ETHER A GO GO RELATED GENE POTASSIUM CHANNEL 3 ERG 3 EAG RELATED 3 ETHER A GO GO RELATED 3 VOLTAGE GATED POTASSIUM CHANNEL SUBUNIT KV11 3	GO:0005575;GO:0006810;GO:0055085;GO:0022857;GO:0003674	cellular_component;transport;transmembrane transport;transmembrane transporter activity;molecular_function
ENSONIG00000011710	G protein-coupled receptor 68	GPR68	1.85899	0.985103	1.87697	0.908406	0.611637	6.50374	0.0107648	0.359271	1	protein_coding			I3K0V1	GO:0016021;GO:0007186;GO:0004930;GO:0016020;GO:0007165	integral component of membrane;G protein-coupled receptor signaling pathway;G protein-coupled receptor activity;membrane;signal transduction	cellular_component;biological_process;molecular_function	PTHR24234	LYSOPHOSPHATIDIC ACID RECEPTOR 5 LPA RECEPTOR 5 LPA 5 G COUPLED RECEPTOR 92	GO:0003674;GO:0007165;GO:0005575	molecular_function;signal transduction;cellular_component
ENSONIG00000018880	DEAD-box helicase 17	si:dkey-156n14.5	42.8616	52.8775	-1.23239	-0.301461	5.67306	6.50853	0.0107358	0.359271	2	protein_coding	ZDB-GENE-030131-18			GO:0005524;GO:0003676;GO:0000166;GO:0016787;GO:0004386	ATP binding;nucleic acid binding;nucleotide binding;hydrolase activity;helicase activity	molecular_function	PTHR24031_SF219	ATP DEPENDENT RNA HELICASE DBP2 EC_3.6.4.13	GO:0003674;GO:0043167;GO:0004386	molecular_function;ion binding;helicase activity
ENSONIG00000020054	protein tyrosine phosphatase, receptor type, h	ptprh	1.91514	0.996169	1.93337	0.951121	0.767129	6.47556	0.0109368	0.362987	2	protein_coding	ZDB-GENE-091118-90			GO:0016791;GO:0016311;GO:0006470;GO:0004725;GO:0005515;GO:0016020;GO:0016021;GO:0016787;GO:0004721;GO:0035335	phosphatase activity;dephosphorylation;protein dephosphorylation;protein tyrosine phosphatase activity;protein binding;membrane;integral component of membrane;hydrolase activity;phosphoprotein phosphatase activity;peptidyl-tyrosine dephosphorylation	molecular_function;biological_process;cellular_component	PTHR19134_SF255	TYROSINE PHOSPHATASE H	GO:0003674;GO:0016791;GO:0006464;GO:0005575	molecular_function;phosphatase activity;cellular protein modification process;cellular_component
ENSONIG00000022415			2.07616	4.01923	-1.92627	-0.945808	1.3654	6.46744	0.0109869	0.363967	1	lincRNA
ENSONIG00000004411	thrombospondin, type I, domain containing 7Ba	thsd7ba	25.1377	33.096	-1.31632	-0.396508	4.84587	6.45019	0.0110941	0.36683	1	protein_coding	ZDB-GENE-070621-2			GO:0016020;GO:0016021	membrane;integral component of membrane	cellular_component	PTHR11311_SF7	THROMBOSPONDIN TYPE 1 DOMAIN CONTAINING 7B PRECURSOR	GO:0005575	cellular_component
ENSONIG00000000977	methyltransferase-like protein 2-A	mettl2a	23.3795	18.4576	1.2694	0.344142	4.38145	6.42118	0.0112767	0.36914	1	protein_coding	ZDB-GENE-050417-462	100698834	I3IX97	GO:0016740;GO:0008168;GO:0032259	transferase activity;methyltransferase activity;methylation	molecular_function;biological_process	PTHR22809_SF4	METHYLTRANSFERASE EC_2.1.1.-	GO:0008168	methyltransferase activity
ENSONIG00000003500	tumor protein p53-inducible nuclear protein 2	si:ch211-260e23.9	1.73956	3.67399	-2.11171	-1.07841	1.59792	6.41923	0.0112891	0.36914	1	protein_coding	ZDB-GENE-141222-48	100697109	I3J6B8	GO:0010506;GO:0008285;GO:0006355	regulation of autophagy;negative regulation of cell population proliferation;regulation of transcription, DNA-templated	biological_process	PTHR31671	TUMOR P53 INDUCIBLE NUCLEAR 1 STRESS INDUCED P53 DEPENDENT DAMAGE INDUCIBLE NUCLEAR 1 P53DINP1
ENSONIG00000012842	translocase of inner mitochondrial membrane 22	TIMM22	24.779	19.8952	1.24851	0.320207	4.51472	6.42085	0.0112788	0.36914	1	protein_coding		100709104	I3K4W7	GO:0045039;GO:0042721;GO:0016020;GO:0016021	protein insertion into mitochondrial inner membrane;TIM22 mitochondrial import inner membrane insertion complex;membrane;integral component of membrane	biological_process;cellular_component	PTHR14110_SF0	MITOCHONDRIAL IMPORT INNER MEMBRANE TRANSLOCASE SUBUNIT TIM22	GO:0061024;GO:0006810;GO:0007005;GO:0006605;GO:0032991;GO:0005575	membrane organization;transport;mitochondrion organization;protein targeting;protein-containing complex;cellular_component
ENSONIG00000012865	catalase	cat	91.359	121.224	-1.32698	-0.408144	6.82589	6.42008	0.0112837	0.36914	1	protein_coding	ZDB-GENE-000210-20	100712286	I3K4Z4	GO:0006979;GO:0020037;GO:0055114;GO:0004096;GO:0042744;GO:0016491;GO:0046872;GO:0098869;GO:0004601	response to oxidative stress;heme binding;oxidation-reduction process;catalase activity;hydrogen peroxide catabolic process;oxidoreductase activity;metal ion binding;cellular oxidant detoxification;peroxidase activity	biological_process;molecular_function	PTHR11465	CATALASE	GO:0003674;GO:0006950;GO:0009056;GO:0051186;GO:0016491;GO:0043167	molecular_function;response to stress;catabolic process;cofactor metabolic process;oxidoreductase activity;ion binding	00630+1.11.1.6;00380+1.11.1.6
ENSONIG00000018067	ferredoxin 2	fdx2	10.6675	7.81956	1.36423	0.448092	3.23417	6.42953	0.0112238	0.36914	1	protein_coding	ZDB-GENE-060929-1046	100699751	I3KNS0	GO:0051536;GO:0009055;GO:0051537;GO:0022900	iron-sulfur cluster binding;electron transfer activity;2 iron, 2 sulfur cluster binding;electron transport chain	molecular_function;biological_process	PTHR23426_SF1	FERREDOXIN 2 MITOCHONDRIAL PRECURSOR ADRENODOXIN FERREDOXIN 1	GO:0003674;GO:0016491;GO:0006091	molecular_function;oxidoreductase activity;generation of precursor metabolites and energy
ENSONIG00000019494	pinin, desmosome associated protein	pnn	39.7709	50.6526	-1.27186	-0.346936	5.43478	6.42297	0.0112654	0.36914	1	protein_coding	ZDB-GENE-060519-3	100704154	I3KTU4	GO:0014033	neural crest cell differentiation	biological_process	PTHR12707_SF0	PININ	GO:0030154	cell differentiation
ENSONIG00000000718			0.995493	0.447452	2.26272	1.17806	-0.0364203	6.39292	0.0114576	0.372824	1	protein_coding				GO:0016021;GO:0016020	integral component of membrane;membrane	cellular_component	PTHR13999	INTERFERON INDUCED TRANSMEMBRANE DISPANIN SUBFAMILY A MEMBER	GO:0005575	cellular_component
ENSONIG00000002586	tyrosyl-DNA phosphodiesterase 2b	tdp2b (1 of many)	30.2817	24.7413	1.22627	0.294283	4.7491	6.38905	0.0114827	0.372824	1	protein_coding	ZDB-GENE-050816-1			GO:0005515	protein binding	molecular_function	PTHR15822	TYROSYL DNA PHOSPHODIESTERASE 2 TYR DNA PHOSPHODIESTERASE 2 EC_3.1.4.- 5' TYROSYL DNA PHOSPHODIESTERASE 5' TYR DNA PHOSPHODIESTERASE TRAF AND TNF RECEPTOR ASSOCIATED	GO:0003674	molecular_function
ENSONIG00000017647	SH3 domain binding glutamate rich protein like	sh3bgrl	116.189	96.5061	1.20321	0.266885	6.70911	6.38852	0.0114861	0.372824	1	protein_coding	ZDB-GENE-040426-1376	100703473	I3KMA8				PTHR12232_SF5	SH3 DOMAIN BINDING GLUTAMIC ACID RICH
ENSONIG00000020185	proto-oncogene c-Fos	fosaa	19.8693	14.0684	1.41406	0.499847	4.31138	6.39493	0.0114447	0.372824	1	protein_coding	ZDB-GENE-131121-552	100711598	I3KWD4	GO:0006357;GO:0003700;GO:0006355;GO:0003677	regulation of transcription by RNA polymerase II;DNA-binding transcription factor activity;regulation of transcription, DNA-templated;DNA binding	biological_process;molecular_function	PTHR23351_SF22	UNCHARACTERIZED	GO:0003674;GO:0003677;GO:0003700	molecular_function;DNA binding;DNA-binding transcription factor activity
ENSONIG00000000114	suppressor of cytokine signaling 7	socs7	63.6132	49.4555	1.28482	0.361572	5.88368	6.37351	0.0115836	0.374552	1	protein_coding	ZDB-GENE-080204-125			GO:0035556;GO:0016567	intracellular signal transduction;protein ubiquitination	biological_process	PTHR10385_SF30	SUPPRESSOR OF CYTOKINE SIGNALING 7 SOCS 7	GO:0007165;GO:0006464	signal transduction;cellular protein modification process
ENSONIG00000003225	vacuolar protein sorting 13 homolog C		84.6349	107.731	-1.27353	-0.348836	6.48355	6.36559	0.0116354	0.374552	2	protein_coding		100707950	I3J5B0;I3J5A9				PTHR16166	VACUOLAR SORTING ASSOCIATED 13
ENSONIG00000006230	family with sequence similarity 189 member A1		41.5313	51.1861	-1.23187	-0.300853	5.48981	6.37135	0.0115977	0.374552	3	protein_coding		100699008	I3JG60;I3JG59;I3JG61	GO:0016021;GO:0016020	integral component of membrane;membrane	cellular_component	PTHR17615	UNKNOWN	GO:0005575	cellular_component
ENSONIG00000006496	toll-like receptor 22	tlr22	2.90487	6.05254	-2.06532	-1.04637	2.27946	6.36805	0.0116193	0.374552	1	protein_coding	ZDB-GENE-040220-5			GO:0007165;GO:0005515;GO:0016020;GO:0016021;GO:0009617;GO:0052033	signal transduction;protein binding;membrane;integral component of membrane;response to bacterium;pathogen-associated molecular pattern dependent induction by symbiont of host innate immune response	biological_process;molecular_function;cellular_component	PTHR24365_SF253	TOLL RECEPTOR	GO:0003674;GO:0007165;GO:0005575	molecular_function;signal transduction;cellular_component
ENSONIG00000026471			5.77685	3.59616	1.60174	0.679641	2.33706	6.3641	0.0116452	0.374552	1	lincRNA
ENSONIG00000008219	ammonium transporter Rh type A	rhd	5.29252	2.50288	2.10309	1.07251	1.96061	6.35398	0.0117118	0.375467	1	protein_coding	ZDB-GENE-051213-1	100703342	I3JNA2	GO:0015696;GO:0008519;GO:0016020;GO:0016021;GO:0072488	ammonium transport;ammonium transmembrane transporter activity;membrane;integral component of membrane;ammonium transmembrane transport	biological_process;molecular_function;cellular_component	PTHR11883	AMMONIUM TRANSPORTER RH TYPE RHESUS BLOOD GROUP FAMILY TYPE GLYCOPROTEIN RH FAMILY TYPE GLYCOPROTEIN RH TYPE GLYCOPROTEIN	GO:0005575;GO:0022857;GO:0003674;GO:0006810	cellular_component;transmembrane transporter activity;molecular_function;transport
ENSONIG00000020785	tubulin folding cofactor C	tbcc	26.9202	22.0131	1.22505	0.29284	4.77064	6.35012	0.0117373	0.375467	1	protein_coding	ZDB-GENE-041008-103			GO:0015631;GO:0000902;GO:0007023;GO:0000166;GO:0005525	tubulin binding;cell morphogenesis;post-chaperonin tubulin folding pathway;nucleotide binding;GTP binding	molecular_function;biological_process	PTHR15139	TUBULIN SPECIFIC CHAPERONE C TUBULIN FOLDING COFACTOR C CFC	GO:0006457;GO:0000902;GO:0003674;GO:0008092;GO:0043167	protein folding;cell morphogenesis;molecular_function;cytoskeletal protein binding;ion binding
ENSONIG00000024395			9.92864	15.3444	-1.54374	-0.626426	3.72952	6.35297	0.0117185	0.375467	1	lincRNA
ENSONIG00000010216	transmembrane 131 like	tmem131l	55.1673	65.8699	-1.19654	-0.258864	5.93519	6.34671	0.0117599	0.375511	3	protein_coding	ZDB-GENE-030131-6110	100706294	I3JVE7;I3JVE9;I3JVE8				PTHR22050	TRANSMEMBRANE 131
ENSONIG00000004341	glutamate receptor 3	gria3a	198.896	242.74	-1.22025	-0.287172	7.79416	6.33272	0.0118531	0.376447	2	protein_coding	ZDB-GENE-020125-5	100697557	I3J9D3;I3J9D2	GO:0038023;GO:0005216;GO:0004970;GO:0006811;GO:0016020;GO:0016021;GO:0034220;GO:0005886;GO:0030054;GO:0035235;GO:0045202;GO:0045211	signaling receptor activity;ion channel activity;ionotropic glutamate receptor activity;ion transport;membrane;integral component of membrane;ion transmembrane transport;plasma membrane;cell junction;ionotropic glutamate receptor signaling pathway;synapse;postsynaptic membrane	molecular_function;biological_process;cellular_component	PTHR18966_SF151	GLUTAMATE RECEPTOR 3 PRECURSOR GLUR 3 AMPA SELECTIVE GLUTAMATE RECEPTOR 3 GLUR C GLUR K3 GLUTAMATE RECEPTOR IONOTROPIC AMPA 3 GLUA3	GO:0005575;GO:0006810;GO:0022857;GO:0003674;GO:0055085;GO:0005886;GO:0007165	cellular_component;transport;transmembrane transporter activity;molecular_function;transmembrane transport;plasma membrane;signal transduction
ENSONIG00000010489	coiled-coil domain containing 77	ccdc77	1.65513	2.94264	-1.76605	-0.820524	1.27941	6.33462	0.0118404	0.376447	2	protein_coding	ZDB-GENE-050913-54		I3JWE0;I3JWE1				PTHR22091	COILED COIL DOMAIN CONTAINING 77
ENSONIG00000020297	GATA-binding factor 2	gata1a	4.5868	2.30271	1.9844	0.988699	1.75881	6.33883	0.0118123	0.376447	1	protein_coding	ZDB-GENE-980526-268	100696076	I3KWS9	GO:0008270;GO:0043565;GO:0003700;GO:0006355;GO:0046872;GO:0003690;GO:0010629;GO:0030099;GO:0030218;GO:0030223;GO:0030224;GO:0030225;GO:0035162;GO:0043009;GO:0043066;GO:0045637;GO:0045944;GO:0048821;GO:0060215	zinc ion binding;sequence-specific DNA binding;DNA-binding transcription factor activity;regulation of transcription, DNA-templated;metal ion binding;double-stranded DNA binding;negative regulation of gene expression;myeloid cell differentiation;erythrocyte differentiation;neutrophil differentiation;monocyte differentiation;macrophage differentiation;embryonic hemopoiesis;chordate embryonic devel…	molecular_function;biological_process	PTHR10071_SF38	GATA BINDING	GO:0003674;GO:0003700;GO:0003677;GO:0043167;GO:0030154;GO:0002376;GO:0042592;GO:0048856;GO:0009790	molecular_function;DNA-binding transcription factor activity;DNA binding;ion binding;cell differentiation;immune system process;homeostatic process;anatomical structure development;embryo development
ENSONIG00000006345	histone deacetylase 5	hdac5	20.324	27.9513	-1.38008	-0.464754	4.48879	6.32129	0.0119297	0.378201	2	protein_coding	ZDB-GENE-121219-3	100693872	I3JGK7;I3JGK8	GO:0000118;GO:0016575;GO:0006325;GO:0004407;GO:0005737;GO:0005634;GO:0040029;GO:0016787;GO:0046872;GO:0032041;GO:0070932	histone deacetylase complex;histone deacetylation;chromatin organization;histone deacetylase activity;cytoplasm;nucleus;regulation of gene expression, epigenetic;hydrolase activity;metal ion binding;NAD-dependent histone deacetylase activity (H3-K14 specific);histone H3 deacetylation	cellular_component;biological_process;molecular_function	PTHR10625_SF57	HISTONE DEACETYLASE 5 HD5 EC_3.5.1.98	GO:0005575;GO:0043226;GO:0005634;GO:0005737;GO:0016810;GO:0006464;GO:0032991;GO:0003674;GO:0043167	cellular_component;organelle;nucleus;cytoplasm;hydrolase activity, acting on carbon-nitrogen (but not peptide) bonds;cellular protein modification process;protein-containing complex;molecular_function;ion binding
ENSONIG00000015435	tripartite motif containing 71	trim71	2.08472	3.71031	-1.76942	-0.823276	1.6089	6.29925	0.0120789	0.382246	1	protein_coding	ZDB-GENE-040128-1	100708487	I3KE78	GO:0008270;GO:0005515;GO:0046872;GO:0010172	zinc ion binding;protein binding;metal ion binding;embryonic body morphogenesis	molecular_function;biological_process	PTHR24103_SF281	E3 UBIQUITIN LIGASE TRIM71 EC_2.3.2.27 LIN 41 HOMOLOG RING TYPE E3 UBIQUITIN TRANSFERASE TRIM71 TRIPARTITE MOTIF CONTAINING 71	GO:0003674;GO:0043167	molecular_function;ion binding
ENSONIG00000019203	peripherin	prph	10.5355	6.19389	1.70351	0.768513	3.11299	6.2897	0.0121441	0.383624	1	protein_coding	ZDB-GENE-990415-207	102079494	I3KSS6	GO:0005882;GO:0005198;GO:0045098;GO:0042246	intermediate filament;structural molecule activity;type III intermediate filament;tissue regeneration	cellular_component;molecular_function;biological_process	PTHR23239_SF29	PERIPHERIN	GO:0003674;GO:0005198;GO:0005575;GO:0048856;GO:0040007	molecular_function;structural molecule activity;cellular_component;anatomical structure development;growth
ENSONIG00000013315	tubby like protein 4a	tulp4a	79.9129	95.1736	-1.19177	-0.253109	6.45027	6.27422	0.0122507	0.384929	1	protein_coding	ZDB-GENE-060503-215			GO:0005515	protein binding	molecular_function	PTHR16517_SF2	TUBBY RELATED 4 TUBBY SUPERFAMILY TUBBY 4	GO:0003674	molecular_function
ENSONIG00000017299			3.92211	1.93877	2.0219	1.01571	1.50209	6.27595	0.0122388	0.384929	1	protein_coding				GO:0016020;GO:0016021	membrane;integral component of membrane	cellular_component			GO:0005575	cellular_component
ENSONIG00000021016	SLIT and NTRK like family member 1	SLITRK1	42.3789	54.5548	-1.28878	-0.366008	5.50037	6.27696	0.0122317	0.384929	1	protein_coding		100691067	I3KYX2	GO:0005515;GO:0016020;GO:0016021	protein binding;membrane;integral component of membrane	molecular_function;cellular_component	PTHR24373_SF33	SLIT AND NTRK 1 PRECURSOR	GO:0003674;GO:0005575	molecular_function;cellular_component
ENSONIG00000008657	sp9 transcription factor	sp9	53.5769	42.4902	1.26088	0.334434	5.55975	6.26654	0.0123039	0.385232	1	protein_coding	ZDB-GENE-040426-2313			GO:0003676;GO:0030326;GO:0035118;GO:0045743	nucleic acid binding;embryonic limb morphogenesis;embryonic pectoral fin morphogenesis;positive regulation of fibroblast growth factor receptor signaling pathway	molecular_function;biological_process	PTHR23223_SF152	TRANSCRIPTION FACTOR SP9	GO:0003674	molecular_function
ENSONIG00000015724	nuclear receptor coactivator 1	ncoa1	24.2399	33.348	-1.37927	-0.46391	4.766	6.26765	0.0122962	0.385232	2	protein_coding	ZDB-GENE-041001-175	100700776	I3KF93;I3KF92	GO:0003713;GO:0005634;GO:0006355;GO:0046983;GO:0030374;GO:0035257;GO:1903508	transcription coactivator activity;nucleus;regulation of transcription, DNA-templated;protein dimerization activity;nuclear receptor transcription coactivator activity;nuclear hormone receptor binding;positive regulation of nucleic acid-templated transcription	molecular_function;cellular_component;biological_process	PTHR10684	NUCLEAR RECEPTOR COACTIVATOR 2 NCOA 2 TRANSCRIPTIONAL INTERMEDIARY FACTOR 2	GO:0003674;GO:0005575;GO:0043226;GO:0005634;GO:0008134	molecular_function;cellular_component;organelle;nucleus;transcription factor binding
ENSONIG00000010105	beta-1,3-N-acetylgalactosaminyltransferase 2	b3galnt2	52.5933	42.9845	1.22335	0.290842	5.59199	6.26317	0.0123274	0.385284	1	protein_coding	ZDB-GENE-050522-358			GO:0008378;GO:0006486;GO:0016020;GO:0016021;GO:0016740;GO:0016757;GO:0005794;GO:0000139	galactosyltransferase activity;protein glycosylation;membrane;integral component of membrane;transferase activity;transferase activity, transferring glycosyl groups;Golgi apparatus;Golgi membrane	molecular_function;biological_process;cellular_component	PTHR11214_SF79	UDP GALNAC:BETA 1 3 N ACETYLGALACTOSAMINYLTRANSFERASE 2 BETA 1 3 GALNAC T2 EC_2.4.1.313 BETA 1 3 N ACETYLGALACTOSAMINYLTRANSFERASE II	GO:0005575;GO:0006464;GO:0016757;GO:0043226;GO:0005794	cellular_component;cellular protein modification process;transferase activity, transferring glycosyl groups;organelle;Golgi apparatus
ENSONIG00000007147	trio Rho guanine nucleotide exchange factor b	triob	205.084	245.663	-1.19807	-0.260708	7.81477	6.22943	0.0125644	0.389938	1	protein_coding	ZDB-GENE-030616-399			GO:0005085;GO:0035556;GO:0035023;GO:0005089;GO:0004674;GO:0006468;GO:0004672;GO:0005524;GO:0005515;GO:0016301;GO:0016310	guanyl-nucleotide exchange factor activity;intracellular signal transduction;regulation of Rho protein signal transduction;Rho guanyl-nucleotide exchange factor activity;protein serine/threonine kinase activity;protein phosphorylation;protein kinase activity;ATP binding;protein binding;kinase activity;phosphorylation	molecular_function;biological_process	PTHR22826_SF104	TRIPLE FUNCTIONAL DOMAIN EC_2.7.11.1	GO:0003674;GO:0043167;GO:0016301;GO:0006464;GO:0007165	molecular_function;ion binding;kinase activity;cellular protein modification process;signal transduction	04151+2.7.11.1;04150+2.7.11.1;05165+2.7.11.1;04926+2.7.11.1;04714+2.7.11.1;05170+2.7.11.1;05163+2.7.11.1
ENSONIG00000010552	serine/arginine repetitive matrix 4	srrm4	18.0719	23.9317	-1.32886	-0.410193	4.33315	6.23313	0.0125382	0.389938	4	protein_coding	ZDB-GENE-050208-34	100694892	I3JWM0;I3JWM3;I3JWM2;I3JWM1				TF648736	SERINE/ARGININE REPETITIVE MATRIX 4 NEURAL SPECIFIC SERINE/ARGININE REPETITIVE SPLICING FACTOR OF 100 KDA ZNSR100 NSR100
ENSONIG00000010825			4.04098	6.29759	-1.56521	-0.646357	2.39974	6.23148	0.0125499	0.389938	1	protein_coding							TF328443	UNCHARACTERIZED
ENSONIG00000012302	attractin	atrn	57.3207	71.8969	-1.25511	-0.327813	5.90668	6.23152	0.0125496	0.389938	1	protein_coding	ZDB-GENE-090312-21			GO:0005515;GO:0016020;GO:0016021	protein binding;membrane;integral component of membrane	molecular_function;cellular_component	PTHR10574_SF223	ATTRACTIN PRECURSOR	GO:0003674;GO:0005575	molecular_function;cellular_component
ENSONIG00000001697	vesicle transport protein GOT1B	GOLT1B (1 of many)	12.457	9.53135	1.30529	0.384373	3.55454	6.22085	0.0126254	0.391145	1	protein_coding		100693736	I3IZT6	GO:0016192;GO:0016020;GO:0016021	vesicle-mediated transport;membrane;integral component of membrane	biological_process;cellular_component	PTHR21493_SF86	VESICLE TRANSPORT GOLGI TRANSPORT 1 HOMOLOG	GO:0006810;GO:0016192;GO:0005575	transport;vesicle-mediated transport;cellular_component
ENSONIG00000026346			43.717	51.8727	-1.18588	-0.24596	5.61193	6.21504	0.012667	0.391745	1	lincRNA
ENSONIG00000003589	arf-GAP with GTPase, ANK repeat and PH domain-containing protein 1	agap1	13.5085	17.1211	-1.27051	-0.345404	3.94513	6.19704	0.0127964	0.393835	1	protein_coding	ZDB-GENE-130405-1	100708930	I3J6M5	GO:0005096;GO:0003924;GO:0005525;GO:0005515;GO:0046872;GO:0043547	GTPase activator activity;GTPase activity;GTP binding;protein binding;metal ion binding;positive regulation of GTPase activity	molecular_function;biological_process	PTHR23180_SF226	ARF GAP WITH GTPASE ANK REPEAT AND PH DOMAIN CONTAINING 1 AGAP 1 CENTAURIN GAMMA 2 CNT G2	GO:0003674;GO:0043167;GO:0003924;GO:0030234	molecular_function;ion binding;GTPase activity;enzyme regulator activity
ENSONIG00000011262	outer dense fiber of sperm tails 2a	odf2a	1.95209	3.71442	-1.93553	-0.952731	1.46626	6.19637	0.0128013	0.393835	1	protein_coding	ZDB-GENE-091117-46						PTHR23162	OUTER DENSE FIBER 2 CENEXIN OUTER DENSE FIBER OF SPERM TAILS 2
ENSONIG00000021348			1.5061	2.53011	-1.65587	-0.727587	1.0592	6.19804	0.0127892	0.393835	1	protein_coding				GO:0003677	DNA binding	molecular_function			GO:0003674;GO:0003677	molecular_function;DNA binding
ENSONIG00000008559	ADAM metallopeptidase domain 23	ADAM23	80.49	95.4923	-1.18586	-0.245931	6.44011	6.19075	0.012842	0.394202	2	protein_coding			I3JPG6;I3JPG5	GO:0004222;GO:0008237;GO:0006508;GO:0016020;GO:0016021	metalloendopeptidase activity;metallopeptidase activity;proteolysis;membrane;integral component of membrane	molecular_function;biological_process;cellular_component	PTHR11905_SF13	DISINTEGRIN AND METALLOPROTEINASE DOMAIN CONTAINING 23 PRECURSOR ADAM 23 METALLOPROTEINASE DISINTEGRIN AND CYSTEINE RICH 3 MDC 3	GO:0008233;GO:0005575	peptidase activity;cellular_component
ENSONIG00000009602	zinc finger protein 511	znf511	6.03721	4.06846	1.48507	0.570527	2.30258	6.18857	0.0128578	0.394202	1	protein_coding	ZDB-GENE-030616-621	100691787	I3JT71	GO:0003676	nucleic acid binding	molecular_function	PTHR21354_SF0	ZINC FINGER 511	GO:0003674	molecular_function
ENSONIG00000019729	CDC28 protein kinase regulatory subunit 1B	cks1b	2.44747	1.37312	1.78158	0.83316	1.19989	6.16203	0.0130521	0.399467	2	protein_coding	ZDB-GENE-040801-112	100697628	I3KUN7;I3KUN6	GO:0016538;GO:0051301;GO:0007049;GO:0000079	cyclin-dependent protein serine/threonine kinase regulator activity;cell division;cell cycle;regulation of cyclin-dependent protein serine/threonine kinase activity	molecular_function;biological_process	PTHR23415	60S RIBOSOME SUBUNIT BIOGENESIS NIP7 HOMOLOG	GO:0003674;GO:0008150;GO:0030234;GO:0051301;GO:0007049	molecular_function;biological_process;enzyme regulator activity;cell division;cell cycle
ENSONIG00000001128	hypocretin (orexin) neuropeptide precursor	hcrt	2.77657	1.07031	2.57148	1.3626	0.782588	6.15676	0.013091	0.399698	1	protein_coding	ZDB-GENE-040324-1			GO:0007631;GO:0007218;GO:0030431;GO:0033555;GO:0042594;GO:0042746	feeding behavior;neuropeptide signaling pathway;sleep;multicellular organismal response to stress;response to starvation;circadian sleep/wake cycle, wakefulness	biological_process	PTHR15173	OREXIN PRECURSOR HYPOCRETIN HCRT [CONTAINS OREXIN A HYPOCRETIN 1 HCRT1 ; OREXIN B HYPOCRETIN 2 HCRT2 ]	GO:0007165;GO:0006950	signal transduction;response to stress
ENSONIG00000014316	aldo-keto reductase family 7, member A3 (aflatoxin aldehyde reductase)	akr7a3	20.9236	16.261	1.28342	0.359991	4.16161	6.1549	0.0131049	0.399698	1	protein_coding	ZDB-GENE-040718-62						PTHR11732_SF181	AFLATOXIN B1 ALDEHYDE REDUCTASE MEMBER 2 EC_1.1.1.- N11 SUCCINIC SEMIALDEHYDE REDUCTASE SSA REDUCTASE
ENSONIG00000008359	dual oxidase 1	duox	2.74709	0.856008	3.15447	1.6574	0.694596	6.15161	0.0131292	0.399753	2	protein_coding	ZDB-GENE-091117-14	100696790	I3JNR7;I3JNR6	GO:0006979;GO:0020037;GO:0005509;GO:0055114;GO:0016491;GO:0004601;GO:0016174;GO:0050665;GO:0016020;GO:0016021;GO:0098869;GO:0002523;GO:0009611;GO:0009617;GO:0030593;GO:0048246;GO:0050832	response to oxidative stress;heme binding;calcium ion binding;oxidation-reduction process;oxidoreductase activity;peroxidase activity;NAD(P)H oxidase activity;hydrogen peroxide biosynthetic process;membrane;integral component of membrane;cellular oxidant detoxification;leukocyte migration involved in inflammatory response;response to wounding;response to bacterium;neutrophil chemotaxis;macrophage…	biological_process;molecular_function;cellular_component	PTHR11972_SF6	DUAL OXIDASE EC_1.11.1.- EC_1.6.3.1	GO:0016491;GO:0003674;GO:0043167;GO:0006950;GO:0009058;GO:0051186;GO:0005575;GO:0002376;GO:0048870;GO:0040011	oxidoreductase activity;molecular_function;ion binding;response to stress;biosynthetic process;cofactor metabolic process;cellular_component;immune system process;cell motility;locomotion
ENSONIG00000011526	piccolo presynaptic cytomatrix protein a	pcloa	387.796	483.182	-1.24601	-0.317314	8.75175	6.143	0.0131933	0.400325	1	protein_coding	ZDB-GENE-030131-8115			GO:0045202;GO:0046872;GO:0005515	synapse;metal ion binding;protein binding	cellular_component;molecular_function	PTHR14113	PICCOLO ACZONIN	GO:0003674;GO:0043167;GO:0005575	molecular_function;ion binding;cellular_component
ENSONIG00000016153	putative apolipoprotein 14kDa	apoa2	1040.44	791.672	1.3142	0.394187	9.71861	6.1434	0.0131904	0.400325	2	protein_coding	ZDB-GENE-030131-1046	100712296	I3KGU9;I3KGV0	GO:0016020;GO:0016021;GO:0000280;GO:0043009;GO:0055113	membrane;integral component of membrane;nuclear division;chordate embryonic development;epiboly involved in gastrulation with mouth forming second	cellular_component;biological_process	TF333660	APOLIPOPROTEIN	GO:0005575;GO:0048856;GO:0009790	cellular_component;anatomical structure development;embryo development
ENSONIG00000003517	G-protein coupled receptor 26	gpr78a	21.8019	16.2046	1.34396	0.426486	4.30968	6.13533	0.0132506	0.401377	1	protein_coding	ZDB-GENE-110411-251	100701374	I3J6D9	GO:0016021;GO:0007186;GO:0004930;GO:0016020	integral component of membrane;G protein-coupled receptor signaling pathway;G protein-coupled receptor activity;membrane	cellular_component;biological_process;molecular_function	PTHR24245	G COUPLED RECEPTOR	GO:0003674;GO:0007165;GO:0005575	molecular_function;signal transduction;cellular_component
ENSONIG00000002802	kinase insert domain receptor like	kdrl	20.2074	26.9921	-1.33711	-0.419122	4.57683	6.12151	0.0133546	0.401775	2	protein_coding	ZDB-GENE-000705-1			GO:0004714;GO:0007169;GO:0004713;GO:0006468;GO:0004672;GO:0005524;GO:0016020;GO:0016021;GO:0016740;GO:0000166;GO:0016301;GO:0016310;GO:0018108	transmembrane receptor protein tyrosine kinase activity;transmembrane receptor protein tyrosine kinase signaling pathway;protein tyrosine kinase activity;protein phosphorylation;protein kinase activity;ATP binding;membrane;integral component of membrane;transferase activity;nucleotide binding;kinase activity;phosphorylation;peptidyl-tyrosine phosphorylation	molecular_function;biological_process;cellular_component	PTHR24416_SF251	VASCULAR ENDOTHELIAL GROWTH FACTOR RECEPTOR KDR PRECURSOR EC_2.7.10.1 FETAL LIVER KINASE 1 FLK 1 KINASE INSERT DOMAIN RECEPTOR A KINASE INSERT DOMAIN RECEPTOR TYROSINE KINASE RECEPTOR FLK 1 VASCULAR ENDOTHELIAL GROWTH FACTOR RECEPTOR 4 VEGFR 4	GO:0003674;GO:0043167;GO:0016301;GO:0006464;GO:0007165;GO:0005575	molecular_function;ion binding;kinase activity;cellular protein modification process;signal transduction;cellular_component
ENSONIG00000005284	transforming growth factor beta regulator 1	tbrg1	46.3055	55.8253	-1.20507	-0.269123	5.77276	6.12412	0.013335	0.401775	1	protein_coding	ZDB-GENE-080220-62	100708602	I3JCQ6	GO:0008285;GO:0006351;GO:0005634;GO:0006355	negative regulation of cell population proliferation;transcription, DNA-templated;nucleus;regulation of transcription, DNA-templated	biological_process;cellular_component	PTHR22715	TRANSFORMING GROWTH FACTOR BETA REGULATOR 1 NUCLEAR INTERACTOR OF ARF AND MDM2	GO:0005575;GO:0043226;GO:0005634;GO:0009058;GO:0034641	cellular_component;organelle;nucleus;biosynthetic process;cellular nitrogen compound metabolic process
ENSONIG00000013585	phospholipase B domain containing 2	zgc:158619	114.84	96.5004	1.19134	0.252582	6.72202	6.12704	0.013313	0.401775	2	protein_coding	ZDB-GENE-070209-116	100690669	I3K7I9;I3K7I8	GO:0016787;GO:0006629;GO:0016042	hydrolase activity;lipid metabolic process;lipid catabolic process	molecular_function;biological_process	PTHR12370	PHOSPHOLIPASE B PRECURSOR EC_3.1.1.- LAMA LAMINA ANCESTOR HOMOLOG	GO:0006629;GO:0009056	lipid metabolic process;catabolic process
ENSONIG00000015593	apoptosis inhibitor 5	api5	86.1988	73.0534	1.18061	0.239537	6.30162	6.12153	0.0133545	0.401775	1	protein_coding	ZDB-GENE-030131-395						PTHR12758_SF19	APOPTOSIS INHIBITOR 5 API
ENSONIG00000000772	INO80 complex subunit	ino80	32.0015	38.8587	-1.21562	-0.28169	5.11802	6.1071	0.013464	0.401897	2	protein_coding	ZDB-GENE-041014-72	100693857	I3IWI6;I3IWI5	GO:0031011;GO:0006338;GO:0006281;GO:0016887;GO:0006351;GO:0005524;GO:0005634;GO:0003677	Ino80 complex;chromatin remodeling;DNA repair;ATPase activity;transcription, DNA-templated;ATP binding;nucleus;DNA binding	cellular_component;biological_process;molecular_function	PTHR10799_SF213	CHROMATIN REMODELING ATPASE INO80 EC_3.6.4.-	GO:0003674;GO:0003677;GO:0005575;GO:0043226;GO:0005634;GO:0043167;GO:0009058;GO:0034641;GO:0016887;GO:0006259;GO:0006950;GO:0032991	molecular_function;DNA binding;cellular_component;organelle;nucleus;ion binding;biosynthetic process;cellular nitrogen compound metabolic process;ATPase activity;DNA metabolic process;response to stress;protein-containing complex
ENSONIG00000002058	peptidylprolyl isomerase H (cyclophilin H)	ppih	24.4482	19.5363	1.25443	0.327037	4.43176	6.10732	0.0134623	0.401897	1	protein_coding	ZDB-GENE-040625-127			GO:0000413;GO:0003755;GO:0006457;GO:0016853;GO:0001525	protein peptidyl-prolyl isomerization;peptidyl-prolyl cis-trans isomerase activity;protein folding;isomerase activity;angiogenesis	biological_process;molecular_function	PTHR11071_SF58	PEPTIDYL PROLYL CIS TRANS ISOMERASE H PPIASE H EC_5.2.1.8 ROTAMASE H	GO:0006457;GO:0016853;GO:0006464;GO:0048646	protein folding;isomerase activity;cellular protein modification process;anatomical structure formation involved in morphogenesis
ENSONIG00000003065	NEDD8 activating enzyme E1 subunit 1	nae1	96.1049	80.636	1.19169	0.253006	6.53473	6.08351	0.0136449	0.401897	1	protein_coding	ZDB-GENE-040426-1552	100695127	I3J4P7	GO:0045116;GO:0019781;GO:0008641	protein neddylation;NEDD8 activating enzyme activity;ubiquitin-like modifier activating enzyme activity	biological_process;molecular_function	PTHR10953_SF29	NEDD8 ACTIVATING ENZYME E1 REGULATORY SUBUNIT APP BP1 AMYLOID BINDING 1	GO:0016874;GO:0006464	ligase activity;cellular protein modification process
ENSONIG00000004764	hypoxia up-regulated 1	hyou1	24.9078	31.4502	-1.26111	-0.334696	4.85015	6.11004	0.0134416	0.401897	1	protein_coding	ZDB-GENE-030131-5344			GO:0000166;GO:0005524	nucleotide binding;ATP binding	molecular_function	PTHR19375_SF90	HYPOXIA UP REGULATED 1 PRECURSOR	GO:0003674;GO:0043167	molecular_function;ion binding
ENSONIG00000005054	platelet-activating factor receptor	ptafr (1 of many)	0.515988	1.22729	-2.30401	-1.20415	-0.0250842	6.08588	0.0136266	0.401897	1	protein_coding	ZDB-GENE-131127-236			GO:0006935;GO:0016021;GO:0007186;GO:0004930;GO:0004992;GO:0016020;GO:0007165	chemotaxis;integral component of membrane;G protein-coupled receptor signaling pathway;G protein-coupled receptor activity;platelet activating factor receptor activity;membrane;signal transduction	biological_process;cellular_component;molecular_function	PTHR24233	RECEPTOR	GO:0003674;GO:0007165;GO:0005575;GO:0040011	molecular_function;signal transduction;cellular_component;locomotion
ENSONIG00000005164	Rho GTPase activating protein 31	arhgap31	8.31346	11.7749	-1.41195	-0.497687	3.36167	6.07581	0.0137045	0.401897	1	protein_coding	ZDB-GENE-100922-256			GO:0007165	signal transduction	biological_process	PTHR15729_SF3	RHO GTPASE ACTIVATING 31 CDC42 GTPASE ACTIVATING	GO:0007165	signal transduction
ENSONIG00000007001	intermediate filament family orphan 1a	iffo1a	84.7035	154.076	-1.81966	-0.863666	6.78395	6.07061	0.0137449	0.401897	1	protein_coding	ZDB-GENE-060503-418			GO:0005198;GO:0005882	structural molecule activity;intermediate filament	molecular_function;cellular_component	PTHR14516	INTERMEDIATE FILAMENT FAMILY ORPHAN	GO:0003674;GO:0005198;GO:0005575	molecular_function;structural molecule activity;cellular_component
ENSONIG00000007360	zinc finger protein 423	si:ch211-216l23.1	32.239	39.4677	-1.22617	-0.294162	5.06345	6.07441	0.0137154	0.401897	2	protein_coding	ZDB-GENE-060503-121			GO:0003676	nucleic acid binding	molecular_function	PTHR24385_SF49	ZINC FINGER 423 OLF1/EBF ASSOCIATED ZINC FINGER SMAD AND OLF INTERACTING ZINC FINGER	GO:0003674	molecular_function
ENSONIG00000009493	obscurin, cytoskeletal calmodulin and titin-interacting RhoGEF	OBSCN	0.350455	1.07245	-2.97227	-1.57156	0.177904	6.08634	0.0136231	0.401897	1	protein_coding				GO:0035023;GO:0005089;GO:0005515	regulation of Rho protein signal transduction;Rho guanyl-nucleotide exchange factor activity;protein binding	biological_process;molecular_function	PTHR19897_SF17	OBSCURIN EC_2.7.11.1 OBSCURIN RHOGEF OBSCURIN MYOSIN LIGHT CHAIN KINASE OBSCURIN MLCK	GO:0003674	molecular_function
ENSONIG00000011052	zmp:0000000846	zmp:0000000846	8.28569	11.8555	-1.43437	-0.520413	3.4484	6.07373	0.0137207	0.401897	1	protein_coding	ZDB-GENE-130530-849			GO:0062023;GO:0042127;GO:0007155;GO:0005515	collagen-containing extracellular matrix;regulation of cell population proliferation;cell adhesion;protein binding	cellular_component;biological_process;molecular_function	PTHR19143_SF38	TENASCIN PRECURSOR TN CYTOTACTIN GMEM GP 150 225 GLIOMA ASSOCIATED EXTRACELLULAR MATRIX ANTIGEN HEXABRACHION JI MYOTENDINOUS ANTIGEN NEURONECTIN TENASCIN C TN C	GO:0003674;GO:0007155;GO:0005575;GO:0031012	molecular_function;cell adhesion;cellular_component;extracellular matrix
ENSONIG00000014786	neural cell adhesion molecule L1.1		50.2011	65.7962	-1.31246	-0.392268	5.80297	6.07722	0.0136936	0.401897	2	protein_coding		100712012	I3KBW9;I3KBX0	GO:0005515;GO:0016020;GO:0016021	protein binding;membrane;integral component of membrane	molecular_function;cellular_component	PTHR10489_SF42	NEURAL CELL ADHESION MOLECULE L1 PRECURSOR N CAM L1 NCAM L1 CD171 ANTIGEN	GO:0003674;GO:0005575	molecular_function;cellular_component
ENSONIG00000016096	store-operated calcium entry-associated regulatory factor	saraf	37.9372	31.0466	1.22414	0.291769	5.14329	6.07095	0.0137423	0.401897	1	protein_coding	ZDB-GENE-060929-208			GO:0030176;GO:2001256	integral component of endoplasmic reticulum membrane;regulation of store-operated calcium entry	cellular_component;biological_process	PTHR15929	STORE OPERATED CALCIUM ENTRY ASSOCIATED REGULATORY FACTOR PRECURSOR SARAF SOCE ASSOCIATED REGULATORY FACTOR TRANSMEMBRANE 66	GO:0005575	cellular_component
ENSONIG00000018007	glutamate receptor, ionotropic, N-methyl D-aspartate 2B, genome duplicate b	grin2bb	34.4343	47.7246	-1.38699	-0.471961	5.31585	6.07456	0.0137143	0.401897	1	protein_coding	ZDB-GENE-061207-27			GO:0038023;GO:0005216;GO:0004970;GO:0006811;GO:0016020;GO:0016021;GO:0034220;GO:0005886;GO:0030054;GO:0035235;GO:0045202;GO:0045211	signaling receptor activity;ion channel activity;ionotropic glutamate receptor activity;ion transport;membrane;integral component of membrane;ion transmembrane transport;plasma membrane;cell junction;ionotropic glutamate receptor signaling pathway;synapse;postsynaptic membrane	molecular_function;biological_process;cellular_component	PTHR18966_SF16	GLUTAMATE RECEPTOR IONOTROPIC NMDA 2B PRECURSOR GLUN2B GLUTAMATE [NMDA] RECEPTOR SUBUNIT EPSILON 2 N METHYL D ASPARTATE RECEPTOR SUBTYPE 2B NMDAR2B NR2B	GO:0005575;GO:0006810;GO:0022857;GO:0003674;GO:0055085;GO:0005886;GO:0007165	cellular_component;transport;transmembrane transporter activity;molecular_function;transmembrane transport;plasma membrane;signal transduction
ENSONIG00000020055	ferritin, middle subunit	zgc:56095	68.0936	54.4126	1.2519	0.324114	5.92197	6.07415	0.0137175	0.401897	1	protein_coding	ZDB-GENE-040426-1948	100704391	I3KVW5	GO:0006826;GO:0008199;GO:0006879;GO:0005623;GO:0046872	iron ion transport;ferric iron binding;cellular iron ion homeostasis;cell;metal ion binding	biological_process;molecular_function;cellular_component	PTHR11431_SF12	FERRITIN	GO:0042592;GO:0003674;GO:0043167;GO:0006810;GO:0005575;GO:0005623	homeostatic process;molecular_function;ion binding;transport;cellular_component;cell
ENSONIG00000021113	POU class 3 homeobox 1	pou3f1	9.41605	6.40663	1.47301	0.558769	3.03113	6.10361	0.0134906	0.401897	1	protein_coding	ZDB-GENE-980526-372	100696285	I3KZ68	GO:0007420;GO:0006357;GO:0043565;GO:0003700;GO:0005634;GO:0006355;GO:0003677	brain development;regulation of transcription by RNA polymerase II;sequence-specific DNA binding;DNA-binding transcription factor activity;nucleus;regulation of transcription, DNA-templated;DNA binding	biological_process;molecular_function;cellular_component	PTHR11636_SF75	POU DOMAIN CLASS 3 TRANSCRIPTION FACTOR 1 HOMEOTIC NRL XLNRL	GO:0003674;GO:0003677;GO:0005575;GO:0043226;GO:0005634;GO:0003700;GO:0048856	molecular_function;DNA binding;cellular_component;organelle;nucleus;DNA-binding transcription factor activity;anatomical structure development
ENSONIG00000024884			4.2816	6.05944	-1.4222	-0.508123	2.36837	6.1101	0.0134411	0.401897	3	lincRNA
ENSONIG00000025355			2.00639	3.43814	-1.71037	-0.774305	1.27842	6.08748	0.0136143	0.401897	1	lincRNA
ENSONIG00000006939	cyclin B3	ccnb3	2.3761	1.02604	2.29667	1.19955	0.817248	6.06213	0.0138111	0.402106	1	protein_coding	ZDB-GENE-060929-684	100534580	I3JIQ8	GO:0005634;GO:0019901;GO:0000079;GO:0010389	nucleus;protein kinase binding;regulation of cyclin-dependent protein serine/threonine kinase activity;regulation of G2/M transition of mitotic cell cycle	cellular_component;molecular_function;biological_process	PTHR10177_SF22	G2/MITOTIC SPECIFIC CYCLIN B3	GO:0003674;GO:0019899;GO:0005575;GO:0043226;GO:0005634	molecular_function;enzyme binding;cellular_component;organelle;nucleus
ENSONIG00000013522	DNA polymerase epsilon, catalytic subunit	pole	1.87946	0.815433	2.27611	1.18657	0.445771	6.06574	0.0137829	0.402106	2	protein_coding	ZDB-GENE-070705-557	100711492	I3K7A9;I3K7B0	GO:0000166;GO:0006281;GO:0006260;GO:0008270;GO:0003676;GO:0005634;GO:0003677;GO:0003887;GO:0008622;GO:0016740;GO:0016779;GO:0046872;GO:0051536;GO:0051539;GO:0071897	nucleotide binding;DNA repair;DNA replication;zinc ion binding;nucleic acid binding;nucleus;DNA binding;DNA-directed DNA polymerase activity;epsilon DNA polymerase complex;transferase activity;nucleotidyltransferase activity;metal ion binding;iron-sulfur cluster binding;4 iron, 4 sulfur cluster binding;DNA biosynthetic process	molecular_function;biological_process;cellular_component	PTHR10670	DNA POLYMERASE EPSILON CATALYTIC SUBUNIT A EC_2.7.7.7 DNA POLYMERASE II SUBUNIT A	GO:0003674;GO:0003677;GO:0005575;GO:0043226;GO:0005634;GO:0043167;GO:0009058;GO:0006259;GO:0034641;GO:0006950;GO:0016779;GO:0032991	molecular_function;DNA binding;cellular_component;organelle;nucleus;ion binding;biosynthetic process;DNA metabolic process;cellular nitrogen compound metabolic process;response to stress;nucleotidyltransferase activity;protein-containing complex	00240+2.7.7.7;00230+2.7.7.7
ENSONIG00000024591			1.10694	2.56831	-2.30807	-1.20669	0.721826	6.06096	0.0138203	0.402106	3	lincRNA
ENSONIG00000008658	obg-like ATPase 1	OLA1	17.9815	13.6499	1.31325	0.393139	3.97285	6.05563	0.013862	0.402208	1	protein_coding		100700376	I3JPU0	GO:0005525;GO:0005634;GO:0000166;GO:0005524;GO:0005737;GO:0016787;GO:0005730;GO:0043022;GO:0016887;GO:0043023	GTP binding;nucleus;nucleotide binding;ATP binding;cytoplasm;hydrolase activity;nucleolus;ribosome binding;ATPase activity;ribosomal large subunit binding	molecular_function;cellular_component	PTHR23305	OBG ATPASE 1	GO:0003674;GO:0043167;GO:0005575;GO:0043226;GO:0005634;GO:0005737;GO:0005730;GO:0016887	molecular_function;ion binding;cellular_component;organelle;nucleus;cytoplasm;nucleolus;ATPase activity	00970+6.1.1.3
ENSONIG00000018022	dual specificity tyrosine phosphorylation regulated kinase 2	dyrk2	71.883	42.3999	1.69493	0.761223	5.87678	6.05298	0.0138828	0.402208	1	protein_coding	ZDB-GENE-030131-2804	100698492	I3KNL6	GO:0006468;GO:0004672;GO:0005524	protein phosphorylation;protein kinase activity;ATP binding	biological_process;molecular_function	PTHR24058_SF51	DUAL SPECIFICITY TYROSINE PHOSPHORYLATION REGULATED KINASE 2 EC_2.7.12.1	GO:0003674;GO:0043167;GO:0016301;GO:0006464	molecular_function;ion binding;kinase activity;cellular protein modification process
ENSONIG00000018578	tropomyosin alpha-1 chain	TPM4 (1 of many)	24.3406	19.027	1.27721	0.352994	4.3516	6.05182	0.013892	0.402208	2	protein_coding		100703626	I3KQJ0;I3KQI9				PTHR19269	TROPOMYOSIN
ENSONIG00000004450	cytoplasmic linker associated protein 1a	clasp1a	177.671	213.619	-1.20253	-0.266078	7.59454	6.03918	0.0139918	0.403078	2	protein_coding	ZDB-GENE-081104-520			GO:0043515;GO:0051010;GO:0005828;GO:0005881	kinetochore binding;microtubule plus-end binding;kinetochore microtubule;cytoplasmic microtubule	molecular_function;cellular_component	PTHR21567_SF28	CLIP ASSOCIATING 1 CYTOPLASMIC LINKER ASSOCIATED 1	GO:0003674;GO:0005575	molecular_function;cellular_component
ENSONIG00000006476	si:dkey-16p21.7	si:dkey-16p21.7	12.5928	17.7693	-1.41682	-0.502661	3.9061	6.03075	0.0140587	0.403078	1	protein_coding	ZDB-GENE-131122-54			GO:0006468;GO:0004672;GO:0005524	protein phosphorylation;protein kinase activity;ATP binding	biological_process;molecular_function	PTHR24343_SF118	SERINE/THREONINE KINASE	GO:0003674;GO:0043167;GO:0016301;GO:0006464	molecular_function;ion binding;kinase activity;cellular protein modification process
ENSONIG00000006478	protein kinase C alpha	PRKCA (1 of many)	30.6186	39.5482	-1.29398	-0.371816	5.05064	6.03404	0.0140326	0.403078	2	protein_coding			I3JH24;I3JH25	GO:0035556;GO:0046872;GO:0004697;GO:0008270;GO:0004674;GO:0006468;GO:0004672;GO:0005524;GO:0016740;GO:0000166;GO:0016301;GO:0016310	intracellular signal transduction;metal ion binding;protein kinase C activity;zinc ion binding;protein serine/threonine kinase activity;protein phosphorylation;protein kinase activity;ATP binding;transferase activity;nucleotide binding;kinase activity;phosphorylation	biological_process;molecular_function	PTHR24357_SF63;PTHR24357_SF65	KINASE C BETA TYPE PKC B PKC BETA EC_2.7.11.13;KINASE C ALPHA TYPE PKC A PKC ALPHA EC_2.7.11.13	GO:0007165;GO:0003674;GO:0043167;GO:0016301;GO:0006464	signal transduction;molecular_function;ion binding;kinase activity;cellular protein modification process	04070+2.7.11.13
ENSONIG00000008427	gamma-aminobutyric acid type A receptor alpha6 subunit	gabra6b	81.4571	100.254	-1.23113	-0.299987	6.56154	6.03913	0.0139922	0.403078	2	protein_coding	ZDB-GENE-080815-1	100534512	I3JP00;I3JNZ9	GO:0004890;GO:0034220;GO:0005230;GO:0005216;GO:0006811;GO:0004888;GO:0016021;GO:0016020;GO:0005886	GABA-A receptor activity;ion transmembrane transport;extracellular ligand-gated ion channel activity;ion channel activity;ion transport;transmembrane signaling receptor activity;integral component of membrane;membrane;plasma membrane	molecular_function;biological_process;cellular_component	PTHR18945_SF335	GAMMA AMINOBUTYRIC ACID RECEPTOR SUBUNIT ALPHA 6 PRECURSOR GABA A RECEPTOR SUBUNIT ALPHA 6	GO:0005575;GO:0003674;GO:0006810;GO:0022857;GO:0055085;GO:0005886	cellular_component;molecular_function;transport;transmembrane transporter activity;transmembrane transport;plasma membrane
ENSONIG00000015521	cadherin 24, type 2b	cdh24b	64.2832	83.5641	-1.30054	-0.379111	6.23241	6.0398	0.0139869	0.403078	1	protein_coding	ZDB-GENE-081104-50			GO:0098609;GO:0007155;GO:0007156;GO:0005886;GO:0005509;GO:0016020;GO:0016021;GO:0046872	cell-cell adhesion;cell adhesion;homophilic cell adhesion via plasma membrane adhesion molecules;plasma membrane;calcium ion binding;membrane;integral component of membrane;metal ion binding	biological_process;cellular_component;molecular_function	PTHR24027_SF272	CADHERIN 24 PRECURSOR	GO:0005575;GO:0003674;GO:0043167;GO:0005886;GO:0007155	cellular_component;molecular_function;ion binding;plasma membrane;cell adhesion
ENSONIG00000024094			0.794452	0.30378	2.57342	1.36369	-0.501114	6.03166	0.0140515	0.403078	1	lincRNA
ENSONIG00000002652	jumonji, AT rich interactive domain 2b	jarid2b	108.564	143.604	-1.32284	-0.403637	6.94881	6.02268	0.0141232	0.403202	1	protein_coding	ZDB-GENE-060503-246			GO:0003677;GO:0005634	DNA binding;nucleus	molecular_function;cellular_component	PTHR10694_SF40	JUMONJI JUMONJI/ARID DOMAIN CONTAINING 2	GO:0003674;GO:0003677;GO:0005575;GO:0043226;GO:0005634	molecular_function;DNA binding;cellular_component;organelle;nucleus
ENSONIG00000004300	protocadherin-1		90.5095	118.904	-1.31394	-0.393896	6.70016	6.01881	0.0141542	0.403202	1	protein_coding		100700286		GO:0007155;GO:0007156;GO:0005886;GO:0005509;GO:0016020;GO:0016021	cell adhesion;homophilic cell adhesion via plasma membrane adhesion molecules;plasma membrane;calcium ion binding;membrane;integral component of membrane	biological_process;cellular_component;molecular_function	PTHR24027_SF30	PROTOCADHERIN 1 PRECURSOR CADHERIN 1 PROTOCADHERIN 42 PC42	GO:0005575;GO:0003674;GO:0043167;GO:0005886;GO:0007155	cellular_component;molecular_function;ion binding;plasma membrane;cell adhesion
ENSONIG00000012988			0.986948	1.98188	-2.00256	-1.00184	0.591262	6.0206	0.0141398	0.403202	1	protein_coding							PTHR10489_SF537	UNCHARACTERIZED
ENSONIG00000013982	glycolipid transfer protein		31.5096	38.1158	-1.20974	-0.2747	5.15802	6.02336	0.0141178	0.403202	3	protein_coding		100707569	I3K8X9;I3K8Y0;I3K8Y1	GO:0005096;GO:0005515;GO:0046872;GO:0043547;GO:0120009;GO:0120013;GO:0005737	GTPase activator activity;protein binding;metal ion binding;positive regulation of GTPase activity;intermembrane lipid transfer;intermembrane lipid transfer activity;cytoplasm	molecular_function;biological_process;cellular_component	PTHR23180_SF215;PTHR10219_SF29	ARF GTPASE ACTIVATING GIT2 ARF GAP GIT2 COOL INTERACTING TYROSINE PHOSPHORYLATED 2 CAT 2 CAT2 G COUPLED RECEPTOR KINASE INTERACTOR 2 GRK INTERACTING 2;GLYCOLIPID TRANSFER GLTP	GO:0003674;GO:0030234;GO:0043167;GO:0005575;GO:0005737;GO:0061024;GO:0006810	molecular_function;enzyme regulator activity;ion binding;cellular_component;cytoplasm;membrane organization;transport
ENSONIG00000024375			1.35417	0.664518	2.04078	1.02912	0.225624	6.01122	0.0142152	0.404288	1	lincRNA
ENSONIG00000022816			1.05684	2.57938	-2.44646	-1.29069	0.833241	6.00304	0.0142813	0.405515	1	lincRNA
ENSONIG00000012490	hydroxylysine kinase	hykk.1	3.53068	6.43635	-1.82805	-0.870305	2.42917	5.99311	0.0143619	0.40715	2	protein_coding	ZDB-GENE-131120-24	100698865	I3K3N3;I3K3N2				PTHR21064	HYDROXYLYSINE KINASE 5 HYDROXY L LYSINE KINASE EC_2.7.1.81 AMINOGLYCOSIDE PHOSPHOTRANSFERASE DOMAIN CONTAINING 1
ENSONIG00000019786	glutamate receptor, ionotropic, delta 2 (Grid2) interacting protein, b	grid2ipb	249.015	307.35	-1.23429	-0.303677	8.16516	5.98318	0.0144429	0.408793	4	protein_coding	ZDB-GENE-040724-161			GO:0005515	protein binding	molecular_function	PTHR23213_SF15	DELPHILIN GLUTAMATE RECEPTOR IONOTROPIC DELTA 2 INTERACTING 1	GO:0003674	molecular_function
ENSONIG00000005005	trafficking protein particle complex subunit 6B	trappc6bl	150.057	109.602	1.36929	0.453432	7.15957	5.97984	0.0144703	0.408914	2	protein_coding	ZDB-GENE-040426-1602	100704500	I3JBQ5;I3JBQ6	GO:0048193;GO:0043087	Golgi vesicle transport;regulation of GTPase activity	biological_process	PTHR12817	TRAFFICKING PARTICLE COMPLEX SUBUNIT TRAPP COMPLEX SUBUNIT	GO:0008150;GO:0006810;GO:0016192	biological_process;transport;vesicle-mediated transport
ENSONIG00000006046	SET binding factor 2	sbf2	34.1177	41.1595	-1.20734	-0.271834	5.25295	5.9743	0.0145158	0.409529	2	protein_coding	ZDB-GENE-030911-10			GO:0043087;GO:0019208	regulation of GTPase activity;phosphatase regulator activity	biological_process;molecular_function	PTHR10807_SF4	MYOTUBULARIN RELATED 13 SET BINDING FACTOR 2	GO:0003674;GO:0030234;GO:0008150	molecular_function;enzyme regulator activity;biological_process
ENSONIG00000006560	CASK interacting protein 1	caskin1	167.229	215.931	-1.29169	-0.369256	7.5055	5.95883	0.0146437	0.409529	2	protein_coding	ZDB-GENE-071115-3			GO:0005515	protein binding	molecular_function	PTHR24177_SF12	CASKIN 1 CASK INTERACTING 1	GO:0003674	molecular_function
ENSONIG00000008360	heme binding protein 1		77.3121	64.1241	1.20717	0.271628	6.25886	5.95758	0.0146541	0.409529	1	protein_coding		100694852	I3JNR8				PTHR11220_SF2	HEME BINDING 1
ENSONIG00000010633	probable cation-transporting ATPase 13A3		8.83801	5.85323	1.50264	0.587495	2.9342	5.96102	0.0146256	0.409529	2	protein_coding		100701967	I3JWX4;I3JWX3	GO:0006812;GO:0000166;GO:0016887;GO:0016021;GO:0016020;GO:0005524;GO:0016787;GO:0046872	cation transport;nucleotide binding;ATPase activity;integral component of membrane;membrane;ATP binding;hydrolase activity;metal ion binding	biological_process;molecular_function;cellular_component	PTHR24093_SF249	PROBABLE CATION TRANSPORTING ATPASE 13A3 EC_3.6.3.- ATPASE FAMILY HOMOLOG UP REGULATED IN SENESCENCE CELLS 1	GO:0005575;GO:0016887;GO:0003674;GO:0006810;GO:0043167	cellular_component;ATPase activity;molecular_function;transport;ion binding
ENSONIG00000012284			15.9984	12.4016	1.29214	0.369758	3.89171	5.95955	0.0146378	0.409529	1	protein_coding				GO:0005515	protein binding	molecular_function	PTHR10516_SF289	PEPTIDYLPROLYL ISOMERASE EC_5.2.1.8	GO:0003674	molecular_function
ENSONIG00000012786	protein kinase C, gamma	prkcg	9.4429	12.5463	-1.32483	-0.405805	3.4215	5.96983	0.0145527	0.409529	1	protein_coding	ZDB-GENE-090206-1			GO:0004697;GO:0035556;GO:0008270;GO:0004674;GO:0006468;GO:0004672;GO:0005524;GO:0016740;GO:0000166;GO:0016301;GO:0016310;GO:0046872;GO:0001881;GO:0060074	protein kinase C activity;intracellular signal transduction;zinc ion binding;protein serine/threonine kinase activity;protein phosphorylation;protein kinase activity;ATP binding;transferase activity;nucleotide binding;kinase activity;phosphorylation;metal ion binding;receptor recycling;synapse maturation	molecular_function;biological_process	PTHR24357_SF79	KINASE C EC_2.7.11.13	GO:0003674;GO:0043167;GO:0016301;GO:0006464;GO:0007165;GO:0021700	molecular_function;ion binding;kinase activity;cellular protein modification process;signal transduction;developmental maturation	04070+2.7.11.13
ENSONIG00000015024			3.13539	1.86755	1.66434	0.734952	1.44096	5.95813	0.0146496	0.409529	1	protein_coding				GO:0003676	nucleic acid binding	molecular_function	PTHR24384	ZINC FINGER	GO:0003674	molecular_function
ENSONIG00000010247	nuclear receptor ROR-beta	rorcb	8.13621	12.5326	-1.54137	-0.624209	3.45456	5.9518	0.0147022	0.410225	2	protein_coding	ZDB-GENE-040724-215	100699176	I3JVJ0;I3JVJ1	GO:0003707;GO:0008270;GO:0043565;GO:0003700;GO:0005634;GO:0006355;GO:0003677;GO:0004879;GO:0046872;GO:0043401;GO:0030522	steroid hormone receptor activity;zinc ion binding;sequence-specific DNA binding;DNA-binding transcription factor activity;nucleus;regulation of transcription, DNA-templated;DNA binding;nuclear receptor activity;metal ion binding;steroid hormone mediated signaling pathway;intracellular receptor signaling pathway	molecular_function;cellular_component;biological_process	PTHR24082_SF268	RAR RELATED ORPHAN RECEPTOR C	GO:0003674;GO:0003677;GO:0005575;GO:0043226;GO:0005634;GO:0003700;GO:0043167;GO:0007165	molecular_function;DNA binding;cellular_component;organelle;nucleus;DNA-binding transcription factor activity;ion binding;signal transduction
ENSONIG00000006666	interleukin-1 receptor accessory protein-like 1-B	il1rapl1a	47.219	57.5394	-1.21846	-0.285061	5.74387	5.94579	0.0147525	0.410979	2	protein_coding	ZDB-GENE-061013-249	100708279	I3JHS5;I3JHS6	GO:0007165;GO:0005515;GO:0016020;GO:0016021	signal transduction;protein binding;membrane;integral component of membrane	biological_process;molecular_function;cellular_component	PTHR11890	INTERLEUKIN 1 RECEPTOR PRECURSOR IL IL INTERLEUKIN 1 RECEPTOR	GO:0003674;GO:0007165;GO:0005575	molecular_function;signal transduction;cellular_component
ENSONIG00000006698	si:dkey-19b23.11	si:dkey-19b23.11	0.861339	0.308381	2.79425	1.48246	-0.256467	5.929	0.0148937	0.4119	2	protein_coding	ZDB-GENE-030131-6199						PTHR23343_SF87	UNCHARACTERIZED
ENSONIG00000006759	COMM domain containing 6	commd6	110.004	93.4901	1.17676	0.234824	6.67197	5.92802	0.014902	0.4119	1	protein_coding	ZDB-GENE-070912-209	100699680	I3JI40				PTHR16231_SF2	COMM DOMAIN CONTAINING 6
ENSONIG00000014843	sodium/potassium-transporting ATPase subunit beta-3		727.382	599.276	1.2138	0.279527	9.44653	5.93031	0.0148826	0.4119	1	protein_coding		100695267	I3KC45	GO:0005890;GO:0006814;GO:0006813;GO:0016020;GO:0016021;GO:0006811	sodium:potassium-exchanging ATPase complex;sodium ion transport;potassium ion transport;membrane;integral component of membrane;ion transport	cellular_component;biological_process	PTHR11523	SODIUM/POTASSIUM TRANSPORTING ATPASE SUBUNIT BETA SODIUM/POTASSIUM DEPENDENT ATPASE SUBUNIT BETA	GO:0006810;GO:0032991;GO:0005575	transport;protein-containing complex;cellular_component
ENSONIG00000020770	shaker-related potassium channel tsha2		8.86335	12.5223	-1.41461	-0.500404	3.32701	5.93751	0.0148219	0.4119	1	protein_coding		100696727	I3KY78	GO:0008076;GO:0006813;GO:0005249;GO:0051260;GO:0005216;GO:0006811;GO:0055085;GO:0016020;GO:0005515;GO:0016021;GO:0005244;GO:0034765;GO:0005267;GO:0071805	voltage-gated potassium channel complex;potassium ion transport;voltage-gated potassium channel activity;protein homooligomerization;ion channel activity;ion transport;transmembrane transport;membrane;protein binding;integral component of membrane;voltage-gated ion channel activity;regulation of ion transmembrane transport;potassium channel activity;potassium ion transmembrane transport	cellular_component;biological_process;molecular_function	PTHR11537_SF104	SHAKER RELATED POTASSIUM CHANNEL TSHA2 TROUT SHAKER 2	GO:0003674;GO:0005575;GO:0006810;GO:0055085;GO:0022857;GO:0022607;GO:0065003;GO:0032991	molecular_function;cellular_component;transport;transmembrane transport;transmembrane transporter activity;cellular component assembly;protein-containing complex assembly;protein-containing complex
ENSONIG00000026066			11.9217	21.3381	-1.79412	-0.843279	3.87992	5.93377	0.0148534	0.4119	1	lincRNA
ENSONIG00000001155	inositol-3-phosphate synthase 1	ISYNA1	200.478	377.144	-1.88112	-0.911589	7.93878	5.91539	0.0150092	0.412549	1	protein_coding		100704062	I3IXX3	GO:0006021;GO:0004512;GO:0008654	inositol biosynthetic process;inositol-3-phosphate synthase activity;phospholipid biosynthetic process	biological_process;molecular_function	PTHR11510	INOSITOL 3 PHOSPHATE SYNTHASE 1 IPS 1 EC_5.5.1.4 MYO INOSITOL 1 PHOSPHATE SYNTHASE MI 1 P SYNTHASE MIP SYNTHASE	GO:0009058;GO:0006629;GO:0016853;GO:0044281;GO:0005975	biosynthetic process;lipid metabolic process;isomerase activity;small molecule metabolic process;carbohydrate metabolic process	00521+5.5.1.4;00562+5.5.1.4
ENSONIG00000001431	FAT atypical cadherin 4	FAT4	20.132	27.5943	-1.36998	-0.454155	4.39946	5.90608	0.0150887	0.412549	1	protein_coding		100712359	I3IYW2	GO:0007155;GO:0007156;GO:0005886;GO:0005509;GO:0016020;GO:0016021	cell adhesion;homophilic cell adhesion via plasma membrane adhesion molecules;plasma membrane;calcium ion binding;membrane;integral component of membrane	biological_process;cellular_component;molecular_function	PTHR24026_SF41	PROTOCADHERIN FAT 4 PRECURSOR FAT TUMOR SUPPRESSOR HOMOLOG 4 FAT CADHERIN FAT J	GO:0005575;GO:0003674;GO:0043167;GO:0005886;GO:0007155	cellular_component;molecular_function;ion binding;plasma membrane;cell adhesion
ENSONIG00000008941			17.2772	22.2544	-1.28581	-0.362673	4.37231	5.90942	0.0150601	0.412549	2	protein_coding			I3JQU4;I3JQU3	GO:0016021;GO:0016020	integral component of membrane;membrane	cellular_component	PTHR12106	VACUOLAR SORTING/TARGETING 10 PRECURSOR CARBOXYPEPTIDASE Y RECEPTOR CPY RECEPTOR SORTILIN VPS10 VACUOLAR CARBOXYPEPTIDASE SORTING RECEPTOR VPS10	GO:0005575	cellular_component
ENSONIG00000009676	glutathione S-transferase	gsta	28.1874	52.3512	-1.85669	-0.89273	5.04893	5.91288	0.0150306	0.412549	1	protein_coding		100534426	A8WE65	GO:0004364;GO:0005515;GO:0016740	glutathione transferase activity;protein binding;transferase activity	molecular_function	PTHR11571_SF101	GLUTATHIONE S TRANSFERASE EC_2.5.1.18 GST A4 4 GST GLUTATHIONE S TRANSFERASE GST	GO:0003674;GO:0016765	molecular_function;transferase activity, transferring alkyl or aryl (other than methyl) groups	00480+2.5.1.18;00980+2.5.1.18;00983+2.5.1.18;00982+2.5.1.18
ENSONIG00000012732	serine/arginine repetitive matrix 3	SRRM3	25.8554	33.3195	-1.28781	-0.364917	4.81419	5.91389	0.0150219	0.412549	2	protein_coding			I3K4H8;I3K4H7				TF604370	SERINE/ARGININE REPETITIVE MATRIX 3
ENSONIG00000018218	PHD finger protein 21Ab	phf21ab	10.8494	15.3888	-1.42011	-0.506008	3.61788	5.91991	0.0149707	0.412549	1	protein_coding	ZDB-GENE-030131-6456			GO:0046872;GO:0060324	metal ion binding;face development	molecular_function;biological_process	PTHR24102_SF6	PHD FINGER 21A BHC80A BRAF35 HDAC COMPLEX BHC80	GO:0003674;GO:0043167;GO:0048856	molecular_function;ion binding;anatomical structure development
ENSONIG00000024168			0.424315	1.21026	-2.85585	-1.51392	-0.060891	5.90757	0.015076	0.412549	1	lincRNA
ENSONIG00000012287	methyl-CpG binding domain protein 5	mbd5	23.6429	31.235	-1.32216	-0.402899	4.74204	5.89789	0.0151591	0.412559	2	protein_coding	ZDB-GENE-070209-125	100710054	I3K2Y0;I3K2X9	GO:0005634;GO:0003677	nucleus;DNA binding	cellular_component;molecular_function	PTHR16112	METHYL CPG BINDING DOMAIN METHYL CPG BINDING	GO:0003674;GO:0003677;GO:0005575;GO:0043226;GO:0005634	molecular_function;DNA binding;cellular_component;organelle;nucleus
ENSONIG00000015980	myotubularin related protein 3	mtmr3	14.1527	24.1366	-1.70646	-0.771008	4.21543	5.89993	0.0151415	0.412559	2	protein_coding	ZDB-GENE-091204-465			GO:0016311;GO:0004725;GO:0035335;GO:0046872	dephosphorylation;protein tyrosine phosphatase activity;peptidyl-tyrosine dephosphorylation;metal ion binding	biological_process;molecular_function	PTHR10807_SF66	MYOTUBULARIN RELATED 3 EC_3.1.3.48 PHOSPHATIDYLINOSITOL 3 5 BISPHOSPHATE 3 PHOSPHATASE EC_3.1.3.- 95 PHOSPHATIDYLINOSITOL 3 PHOSPHATE PHOSPHATASE EC_3.1.-.- 3 64	GO:0016791;GO:0006464;GO:0003674;GO:0043167	phosphatase activity;cellular protein modification process;molecular_function;ion binding	04070+3.1.3.64+3.1.3.95;00562+3.1.3.64+3.1.3.95
ENSONIG00000018565	matrix metallopeptidase 24	mmp24	36.6354	51.1059	-1.39738	-0.482728	5.40356	5.89947	0.0151454	0.412559	1	protein_coding	ZDB-GENE-040724-262			GO:0031012;GO:0004222;GO:0005887;GO:0008237;GO:0008270;GO:0006508;GO:0016020;GO:0016021;GO:0008233;GO:0016787;GO:0046872	extracellular matrix;metalloendopeptidase activity;integral component of plasma membrane;metallopeptidase activity;zinc ion binding;proteolysis;membrane;integral component of membrane;peptidase activity;hydrolase activity;metal ion binding	cellular_component;molecular_function;biological_process	PTHR10201_SF138	MATRIX METALLOPROTEINASE 24 PRECURSOR MMP 24 EC_3.4.24.- MEMBRANE TYPE MATRIX METALLOPROTEINASE 5 MT MMP 5 MTMMP5 MEMBRANE TYPE 5 MATRIX METALLOPROTEINASE MT5 MMP MT5MMP [CONTAINS PROCESSED MATRIX METALLOPROTEINASE 24]	GO:0003674;GO:0043167;GO:0008233;GO:0005575;GO:0031012	molecular_function;ion binding;peptidase activity;cellular_component;extracellular matrix
ENSONIG00000007278	proteasome subunit alpha 2	psma2	45.4006	35.3144	1.28547	0.362298	5.41206	5.88525	0.0152682	0.414892	1	protein_coding	ZDB-GENE-050522-479	100694136	I3JJY5	GO:0019773;GO:0004175;GO:0005839;GO:0051603;GO:0004298;GO:0006511;GO:0005634;GO:0005737;GO:0008233;GO:0016787;GO:0006508;GO:0000502	proteasome core complex, alpha-subunit complex;endopeptidase activity;proteasome core complex;proteolysis involved in cellular protein catabolic process;threonine-type endopeptidase activity;ubiquitin-dependent protein catabolic process;nucleus;cytoplasm;peptidase activity;hydrolase activity;proteolysis;proteasome complex	cellular_component;molecular_function;biological_process	PTHR11599_SF16	PROTEASOME SUBUNIT ALPHA TYPE 2 EC_3.4.25.1	GO:0009056;GO:0032991;GO:0005575;GO:0008233;GO:0043226;GO:0005634;GO:0005737	catabolic process;protein-containing complex;cellular_component;peptidase activity;organelle;nucleus;cytoplasm
ENSONIG00000024536			1.43379	2.63515	-1.82778	-0.870093	1.10269	5.87816	0.0153298	0.415928	1	lincRNA
ENSONIG00000000349	WD repeat domain 83	wdr83	18.3318	14.174	1.28976	0.367101	4.0314	5.85602	0.0155239	0.416027	1	protein_coding	ZDB-GENE-040718-126	100699151	I3IUZ9	GO:0005515	protein binding	molecular_function	PTHR22842	WD REPEAT DOMAIN CONTAINING 83 MITOGEN ACTIVATED KINASE ORGANIZER 1 MAPK ORGANIZER 1	GO:0003674	molecular_function
ENSONIG00000001027	SH3 and cysteine-rich domain-containing protein 2	STAC2 (1 of many)	43.3691	51.9836	-1.1984	-0.261114	5.64537	5.85361	0.0155451	0.416027	2	protein_coding		100700177	I3IXG0;I3IXG1	GO:0035556;GO:0005515;GO:0046872	intracellular signal transduction;protein binding;metal ion binding	biological_process;molecular_function	PTHR15135	SH3 AND CYSTEINE RICH DOMAIN CONTAINING SRC HOMOLOGY 3 AND CYSTEINE RICH DOMAIN CONTAINING	GO:0003674;GO:0007165;GO:0043167	molecular_function;signal transduction;ion binding
ENSONIG00000001921	quiescin sulfhydryl oxidase 1	qsox1	10.2113	7.24222	1.41226	0.49801	3.17661	5.85702	0.015515	0.416027	2	protein_coding	ZDB-GENE-030131-7019	100706190	I3J0L7;I3J0L8	GO:0016971;GO:0016972;GO:0045454;GO:0055114;GO:0016020;GO:0016021;GO:0016491;GO:0005623	flavin-linked sulfhydryl oxidase activity;thiol oxidase activity;cell redox homeostasis;oxidation-reduction process;membrane;integral component of membrane;oxidoreductase activity;cell	molecular_function;biological_process;cellular_component	PTHR22897_SF6	SULFHYDRYL OXIDASE 1 PRECURSOR EC_1.8.3.2 QUIESCIN Q6	GO:0042592;GO:0005575;GO:0016491;GO:0005623	homeostatic process;cellular_component;oxidoreductase activity;cell
ENSONIG00000002645	ADP-ribosylation factor-like 13A	arl13a	1.93325	4.09179	-2.10276	-1.07229	1.45517	5.85678	0.0155172	0.416027	1	protein_coding	ZDB-GENE-040426-1790			GO:0005525;GO:0000166	GTP binding;nucleotide binding	molecular_function	PTHR11711_SF111	ADP RIBOSYLATION FACTOR 13A	GO:0003674;GO:0043167	molecular_function;ion binding
ENSONIG00000004290	syntaxin binding protein 5-like	stxbp5l	191.642	231.23	-1.20697	-0.271395	7.70654	5.85538	0.0155295	0.416027	2	protein_coding	ZDB-GENE-041210-220			GO:0005515;GO:0016192;GO:0016021	protein binding;vesicle-mediated transport;integral component of membrane	molecular_function;biological_process;cellular_component	PTHR10241	LETHAL 2 GIANT LARVAE HOMOLOG	GO:0003674;GO:0005575;GO:0006810;GO:0016192	molecular_function;cellular_component;transport;vesicle-mediated transport
ENSONIG00000004626	trafficking protein particle complex 3	trappc3	80.9874	67.4177	1.202	0.265435	6.17426	5.86993	0.0154017	0.416027	1	protein_coding	ZDB-GENE-040801-120	100697347	I3JAD6	GO:0048193;GO:0030008;GO:0005794;GO:0005783;GO:0016192	Golgi vesicle transport;TRAPP complex;Golgi apparatus;endoplasmic reticulum;vesicle-mediated transport	biological_process;cellular_component	PTHR13048	TRAFFICKING PARTICLE COMPLEX SUBUNIT 3	GO:0006810;GO:0016192;GO:0032991;GO:0005575;GO:0043226;GO:0005794;GO:0005783	transport;vesicle-mediated transport;protein-containing complex;cellular_component;organelle;Golgi apparatus;endoplasmic reticulum
ENSONIG00000004866	fructose-bisphosphate aldolase B	aldob	14.0062	9.65498	1.45176	0.537805	3.65353	5.87291	0.0153756	0.416027	1	protein_coding	ZDB-GENE-030131-383	100694503	I3JB82	GO:0006096;GO:0003824;GO:0004332;GO:0016829	glycolytic process;catalytic activity;fructose-bisphosphate aldolase activity;lyase activity	biological_process;molecular_function	PTHR11627	FRUCTOSE BISPHOSPHATE ALDOLASE EC_4.1.2.13	GO:0003674;GO:0009058;GO:0044281;GO:0005975;GO:0009056;GO:0006091;GO:0034641;GO:0051186;GO:0034655;GO:0016829	molecular_function;biosynthetic process;small molecule metabolic process;carbohydrate metabolic process;catabolic process;generation of precursor metabolites and energy;cellular nitrogen compound metabolic process;cofactor metabolic process;nucleobase-containing compound catabolic process;lyase activity	00710+4.1.2.13;00051+4.1.2.13;00680+4.1.2.13;00030+4.1.2.13;00010+4.1.2.13
ENSONIG00000012956	niban-like protein 1	fam129ba	32.8657	26.9026	1.22475	0.292486	4.87107	5.86587	0.0154372	0.416027	2	protein_coding	ZDB-GENE-070112-1222	102082825	I3K5A2;I3K5A3				PTHR14392	NIBAN
ENSONIG00000016806	sterile alpha motif domain-containing protein 10	samd10a	41.2505	30.8331	1.33868	0.420814	5.11208	5.86009	0.015488	0.416027	1	protein_coding	ZDB-GENE-080204-53	100697920	I3KJ82	GO:0005515	protein binding	molecular_function	PTHR20843	STERILE ALPHA MOTIF DOMAIN CONTAINING SAM DOMAIN CONTAINING	GO:0003674	molecular_function
ENSONIG00000007853	phosphatidylinositol 3-kinase regulatory subunit gamma	pik3r3b	119.157	143.977	-1.20792	-0.272522	7.1247	5.83974	0.0156681	0.418685	1	protein_coding	ZDB-GENE-040426-743	100690473	I3JM05	GO:0005942;GO:0035014;GO:0043551	phosphatidylinositol 3-kinase complex;phosphatidylinositol 3-kinase regulator activity;regulation of phosphatidylinositol 3-kinase activity	cellular_component;molecular_function;biological_process	PTHR10155_SF2	PHOSPHATIDYLINOSITOL 3 KINASE REGULATORY SUBUNIT GAMMA PI3 KINASE REGULATORY SUBUNIT GAMMA PI3K REGULATORY SUBUNIT GAMMA PTDINS 3 KINASE REGULATORY SUBUNIT GAMMA PHOSPHATIDYLINOSITOL 3 KINASE 55 KDA REGULATORY SUBUNIT GAMMA PI3 KINASE SUBUNIT P55 GAMMA PTDINS 3 KINASE REGULATORY SUBUNIT P55 GAMMA P55PIK	GO:0003674;GO:0030234;GO:0032991;GO:0005575	molecular_function;enzyme regulator activity;protein-containing complex;cellular_component
ENSONIG00000007822	small nuclear ribonucleoprotein 70 (U1)	snrnp70	47.1407	55.2187	-1.17143	-0.22827	5.62865	5.82989	0.0157561	0.420399	1	protein_coding	ZDB-GENE-040825-2			GO:0005685;GO:0000398;GO:0003676;GO:0030619;GO:0003723;GO:0060218	U1 snRNP;mRNA splicing, via spliceosome;nucleic acid binding;U1 snRNA binding;RNA binding;hematopoietic stem cell differentiation	cellular_component;biological_process;molecular_function	PTHR13952_SF5	U1 SMALL NUCLEAR RIBONUCLEOPROTEIN 70 KDA U1 SNRNP 70 KDA U1 70K	GO:0003674;GO:0034641;GO:0006397;GO:0032991;GO:0005575;GO:0003723;GO:0048856;GO:0030154	molecular_function;cellular nitrogen compound metabolic process;mRNA processing;protein-containing complex;cellular_component;RNA binding;anatomical structure development;cell differentiation
ENSONIG00000013028	si:ch211-168d1.3	si:ch211-168d1.3	72.078	92.5745	-1.28494	-0.361699	6.37395	5.8256	0.0157946	0.420792	1	protein_coding	ZDB-GENE-160113-13						PTHR23101_SF48	RAS AND RAB INTERACTOR
ENSONIG00000006232	26S proteasome non-ATPase regulatory subunit 4	psmd4b	77.1136	64.9417	1.18752	0.247946	6.13725	5.81856	0.015858	0.421274	1	protein_coding	ZDB-GENE-050417-96	102080582	I3JG63				PTHR10223	26S PROTEASOME NON ATPASE REGULATORY SUBUNIT 4 26S PROTEASOME REGULATORY SUBUNIT RPN10 26S PROTEASOME REGULATORY SUBUNIT S5A
ENSONIG00000015922	hyaluronan and proteoglycan link protein 1a	hapln1a	38.5756	30.3708	1.27173	0.346797	5.1881	5.8183	0.0158603	0.421274	1	protein_coding	ZDB-GENE-050302-175			GO:0005540;GO:0007155;GO:0031101	hyaluronic acid binding;cell adhesion;fin regeneration	molecular_function;biological_process	PTHR22804_SF39	HYALURONAN AND PROTEOGLYCAN LINK	GO:0007155;GO:0003674;GO:0043167;GO:0048856;GO:0040007	cell adhesion;molecular_function;ion binding;anatomical structure development;growth
ENSONIG00000018483	protein APCDD1	APCDD1	19.294	14.1927	1.3615	0.445194	4.01898	5.8114	0.0159226	0.422295	1	protein_coding		100712112	I3KQ76				PTHR31021	APCDD1 PRECURSOR ADENOMATOSIS POLYPOSIS COLI DOWN REGULATED 1
ENSONIG00000004295	GM2 ganglioside activator	gm2a	65.6535	54.8458	1.19933	0.262234	5.89868	5.78882	0.0161284	0.42267	2	protein_coding	ZDB-GENE-050417-373	100699750	I3J975;I3J974	GO:0008047;GO:0006689;GO:0043085	enzyme activator activity;ganglioside catabolic process;positive regulation of catalytic activity	molecular_function;biological_process	PTHR17357	GANGLIOSIDE GM2 ACTIVATOR PRECURSOR CEREBROSIDE SULFATE ACTIVATOR GM2 AP SPHINGOLIPID ACTIVATOR 3 SAP 3	GO:0003674;GO:0030234;GO:0009056;GO:0034641;GO:0006629;GO:0008150	molecular_function;enzyme regulator activity;catabolic process;cellular nitrogen compound metabolic process;lipid metabolic process;biological_process
ENSONIG00000005980	H2.0 like homeobox	hlx1	1.09872	2.41354	-2.20644	-1.14172	0.805657	5.78368	0.0161757	0.42267	1	protein_coding	ZDB-GENE-030131-5304	100691454	I3JF89	GO:0043565;GO:0006355;GO:0003677;GO:0005634;GO:0002040	sequence-specific DNA binding;regulation of transcription, DNA-templated;DNA binding;nucleus;sprouting angiogenesis	molecular_function;biological_process;cellular_component	PTHR24331	HOMEOBOX DBX1 DEVELOPING BRAIN HOMEOBOX 1	GO:0003674;GO:0003677;GO:0005575;GO:0043226;GO:0005634;GO:0048646	molecular_function;DNA binding;cellular_component;organelle;nucleus;anatomical structure formation involved in morphogenesis
ENSONIG00000006633	ER membrane protein complex subunit 9	emc9	38.0382	30.5936	1.24235	0.313077	5.1583	5.79328	0.0160875	0.42267	1	protein_coding	ZDB-GENE-040426-693	100707511	I3JHN8				PTHR12941	ER MEMBRANE COMPLEX SUBUNIT 8 NEIGHBOR OF COX4
ENSONIG00000007788	trio Rho guanine nucleotide exchange factor	TRIO	331.875	409.132	-1.23312	-0.302315	8.42052	5.79483	0.0160734	0.42267	1	protein_coding		100707006	I3JLR7	GO:0005085;GO:0035023;GO:0005089;GO:0004674;GO:0006468;GO:0004672;GO:0005524;GO:0005515;GO:0016301;GO:0016310	guanyl-nucleotide exchange factor activity;regulation of Rho protein signal transduction;Rho guanyl-nucleotide exchange factor activity;protein serine/threonine kinase activity;protein phosphorylation;protein kinase activity;ATP binding;protein binding;kinase activity;phosphorylation	molecular_function;biological_process	PTHR22826_SF104	TRIPLE FUNCTIONAL DOMAIN EC_2.7.11.1	GO:0003674;GO:0043167;GO:0016301;GO:0006464	molecular_function;ion binding;kinase activity;cellular protein modification process	04151+2.7.11.1;04150+2.7.11.1;05165+2.7.11.1;04926+2.7.11.1;04714+2.7.11.1;05170+2.7.11.1;05163+2.7.11.1
ENSONIG00000014135	DENN domain containing 1B	DENND1B	13.9386	18.353	-1.32302	-0.403831	3.98121	5.79046	0.0161134	0.42267	1	protein_coding			I3K9H6	GO:0017112	Rab guanyl-nucleotide exchange factor activity	molecular_function	PTHR13196_SF24	DENN DOMAIN CONTAINING 1B CONNECDENN 2	GO:0003674	molecular_function
ENSONIG00000014845	nudix hydrolase 7	nudt7	11.4881	8.97206	1.28187	0.358249	3.44977	5.78508	0.0161628	0.42267	1	protein_coding	ZDB-GENE-131127-212	100698824	I3KC47	GO:0016787;GO:0016020;GO:0016021	hydrolase activity;membrane;integral component of membrane	molecular_function;cellular_component	PTHR12992_SF5	PEROXISOMAL COENZYME A DIPHOSPHATASE NUDT7 EC_3.6.1.- NUCLEOSIDE DIPHOSPHATE LINKED MOIETY X MOTIF 7 NUDIX MOTIF 7	GO:0005575	cellular_component
ENSONIG00000016052	RPE-retinal G protein-coupled receptor	rgrb	6.62233	4.35099	1.51512	0.599431	2.48703	5.78998	0.0161178	0.42267	1	protein_coding	ZDB-GENE-050522-447	100692963	I3KGH7	GO:0007601;GO:0016021;GO:0007186;GO:0004930;GO:0007602;GO:0016020	visual perception;integral component of membrane;G protein-coupled receptor signaling pathway;G protein-coupled receptor activity;phototransduction;membrane	biological_process;cellular_component;molecular_function	PTHR24227	C C CHEMOKINE RECEPTOR TYPE C C CKR CC CKR CCR ANTIGEN	GO:0003674;GO:0007165;GO:0005575;GO:0050877	molecular_function;signal transduction;cellular_component;nervous system process
ENSONIG00000016147			81.1352	99.3892	-1.2248	-0.292544	6.51311	5.79147	0.0161041	0.42267	1	protein_coding			I3KGU3	GO:0008076;GO:0006813;GO:0005249;GO:0005216;GO:0006811;GO:0055085;GO:0016020;GO:0060072;GO:0016021;GO:0005244;GO:0034765;GO:0005267;GO:0071805	voltage-gated potassium channel complex;potassium ion transport;voltage-gated potassium channel activity;ion channel activity;ion transport;transmembrane transport;membrane;large conductance calcium-activated potassium channel activity;integral component of membrane;voltage-gated ion channel activity;regulation of ion transmembrane transport;potassium channel activity;potassium ion transmembrane …	cellular_component;biological_process;molecular_function	PTHR10027_SF18	CALCIUM ACTIVATED POTASSIUM CHANNEL SUBUNIT ALPHA 1 BK CHANNEL BKCA ALPHA CALCIUM ACTIVATED POTASSIUM CHANNEL SUBFAMILY M SUBUNIT ALPHA 1 K VCA ALPHA KCA1 1 MAXI K CHANNEL MAXIK SLO ALPHA SLO1 SLOWPOKE HOMOLOG SLO HOMOLOG	GO:0005575;GO:0006810;GO:0055085;GO:0022857;GO:0003674;GO:0032991	cellular_component;transport;transmembrane transport;transmembrane transporter activity;molecular_function;protein-containing complex
ENSONIG00000016452	G protein-activated inward rectifier potassium channel 1	kcnj19b	77.0692	65.0399	1.18341	0.242948	6.27227	5.79197	0.0160996	0.42267	2	protein_coding	ZDB-GENE-121214-60	100690095	I3KHX6;I3KHX7	GO:0015467;GO:0005242;GO:0006813;GO:0016021;GO:0016020;GO:0005244;GO:0006811;GO:0034220;GO:0034765;GO:0071805	G-protein activated inward rectifier potassium channel activity;inward rectifier potassium channel activity;potassium ion transport;integral component of membrane;membrane;voltage-gated ion channel activity;ion transport;ion transmembrane transport;regulation of ion transmembrane transport;potassium ion transmembrane transport	molecular_function;biological_process;cellular_component	PTHR11767	INWARD RECTIFIER POTASSIUM CHANNEL INWARD RECTIFIER K + CHANNEL POTASSIUM CHANNEL INWARDLY RECTIFYING SUBFAMILY J MEMBER	GO:0005575;GO:0006810;GO:0022857;GO:0003674;GO:0055085	cellular_component;transport;transmembrane transporter activity;molecular_function;transmembrane transport
ENSONIG00000023564			0.707888	1.46728	-2.02583	-1.01851	0.167593	5.79423	0.0160788	0.42267	1	lincRNA
ENSONIG00000025844			7.71778	5.65627	1.36718	0.451208	2.67994	5.78041	0.0162058	0.422832	1	lincRNA
ENSONIG00000004039	dual specificity phosphatase 4	dusp4	67.8524	83.5444	-1.23045	-0.299182	6.18418	5.76934	0.0163082	0.423629	1	protein_coding	ZDB-GENE-040426-709	100711918	I3J8A1	GO:0017017;GO:0008138;GO:0016791;GO:0016311;GO:0006470;GO:0004725;GO:0016787;GO:0004721;GO:0035335;GO:0000188;GO:0001706;GO:0001714	MAP kinase tyrosine/serine/threonine phosphatase activity;protein tyrosine/serine/threonine phosphatase activity;phosphatase activity;dephosphorylation;protein dephosphorylation;protein tyrosine phosphatase activity;hydrolase activity;phosphoprotein phosphatase activity;peptidyl-tyrosine dephosphorylation;inactivation of MAPK activity;endoderm formation;endodermal cell fate specification	molecular_function;biological_process	PTHR10159_SF111	DUAL SPECIFICITY PHOSPHATASE 4 EC_3.1.3.16 EC_3.1.3.- 48 MITOGEN ACTIVATED KINASE PHOSPHATASE 2 MAP KINASE PHOSPHATASE 2 MKP 2	GO:0016791;GO:0006464;GO:0048646	phosphatase activity;cellular protein modification process;anatomical structure formation involved in morphogenesis	04660+3.1.3.16;04658+3.1.3.16
ENSONIG00000016580	kelch like family member 21	klhl21	23.3651	28.6227	-1.22273	-0.290112	4.7295	5.77241	0.0162797	0.423629	1	protein_coding	ZDB-GENE-040426-2627	100705292	I3KID6	GO:0005515	protein binding	molecular_function	PTHR24412_SF7	KELCH 21	GO:0003674	molecular_function
ENSONIG00000021393	melanocortin 1 receptor	mc1r	1.80377	0.833954	2.1488	1.10353	0.760868	5.77191	0.0162843	0.423629	1	protein_coding	ZDB-GENE-030502-1	100705045	I3KZZ8	GO:0016021;GO:0007186;GO:0004930;GO:0004977;GO:0004980;GO:0016020;GO:0007165;GO:0005886	integral component of membrane;G protein-coupled receptor signaling pathway;G protein-coupled receptor activity;melanocortin receptor activity;melanocyte-stimulating hormone receptor activity;membrane;signal transduction;plasma membrane	cellular_component;biological_process;molecular_function	PTHR22750	MELANOCYTE STIMULATING HORMONE RECEPTOR MSH R MELANOCORTIN RECEPTOR 1 MC1 R	GO:0003674;GO:0007165;GO:0005575;GO:0005886	molecular_function;signal transduction;cellular_component;plasma membrane
ENSONIG00000024774			2.43123	1.10093	2.22	1.15056	0.731119	5.76411	0.0163568	0.424269	1	lincRNA
ENSONIG00000000115	thiosulfate sulfurtransferase like domain containing 3		10.0379	6.77693	1.48243	0.567964	3.09085	5.76049	0.0163905	0.42452	1	protein_coding		100694266	I3IU52				PTHR13253_SF12	UNCHARACTERIZED
ENSONIG00000018130			7.25142	10.5704	-1.44906	-0.535117	2.98592	5.75587	0.0164337	0.424564	1	protein_coding				GO:0016020;GO:0016021	membrane;integral component of membrane	cellular_component	TF658590	UNCHARACTERIZED	GO:0005575	cellular_component
ENSONIG00000023919			0.612128	1.19323	-1.9522	-0.9651	0.116086	5.75518	0.0164401	0.424564	2	lincRNA
ENSONIG00000018143			46.5126	56.4684	-1.21608	-0.282239	5.6135	5.75105	0.0164788	0.424942	1	protein_coding				GO:0032012;GO:0005086;GO:0005543;GO:0005515	regulation of ARF protein signal transduction;ARF guanyl-nucleotide exchange factor activity;phospholipid binding;protein binding	biological_process;molecular_function	PTHR10663_SF115	PH AND SEC7 DOMAIN CONTAINING 1 EXCHANGE FACTOR ADP RIBOSYLATION FACTOR GUANINE NUCLEOTIDE FACTOR 6 EXCHANGE FACTOR ARF6 EXCHANGE FACTOR ARF6 A PLECKSTRIN HOMOLOGY AND SEC7 DOMAIN CONTAINING 1	GO:0003674;GO:0043167;GO:0008289	molecular_function;ion binding;lipid binding
ENSONIG00000007626	transmembrane protein 222	tmem222b	31.3233	25.0007	1.25169	0.323877	4.78925	5.74653	0.0165213	0.425263	1	protein_coding	ZDB-GENE-090303-4	100698663	I3JL67	GO:0016020;GO:0016021	membrane;integral component of membrane	cellular_component	PTHR20921	TRANSMEMBRANE 222	GO:0005575	cellular_component
ENSONIG00000010450	general transcription factor IIH subunit 2	gtf2h2	18.3091	22.8528	-1.24821	-0.319858	4.39469	5.74461	0.0165394	0.425263	1	protein_coding	ZDB-GENE-030131-1959	100696048	I3JW89	GO:0006289;GO:0006281;GO:0008270;GO:0006351;GO:0003676;GO:0000439;GO:0005634;GO:0046872;GO:0005675	nucleotide-excision repair;DNA repair;zinc ion binding;transcription, DNA-templated;nucleic acid binding;transcription factor TFIIH core complex;nucleus;metal ion binding;transcription factor TFIIH holo complex	biological_process;molecular_function;cellular_component	PTHR12695	GENERAL TRANSCRIPTION FACTOR IIH SUBUNIT TRANSCRIPTION FACTOR SUBUNIT TFIIH BASAL TRANSCRIPTION FACTOR COMPLEX SUBUNIT	GO:0003674;GO:0009058;GO:0034641;GO:0043167;GO:0006259;GO:0006950;GO:0032991;GO:0005575;GO:0043226;GO:0005634	molecular_function;biosynthetic process;cellular nitrogen compound metabolic process;ion binding;DNA metabolic process;response to stress;protein-containing complex;cellular_component;organelle;nucleus
ENSONIG00000002711	14-3-3 protein beta/alpha-A	ywhaz	172.214	147.907	1.16439	0.219579	7.33618	5.7331	0.0166481	0.427438	1	protein_coding	ZDB-GENE-030131-8554	100689836	I3J3G0	GO:0019904	protein domain specific binding	molecular_function	PTHR18860	UNKNOWN	GO:0003674	molecular_function
ENSONIG00000017312	vacuolar protein sorting 13 homolog D (S. cerevisiae)	vps13d	70.1826	90.4127	-1.28798	-0.365113	6.20874	5.72934	0.0166837	0.427732	1	protein_coding	ZDB-GENE-050912-1			GO:0005515	protein binding	molecular_function	PTHR16166	VACUOLAR SORTING ASSOCIATED 13	GO:0003674	molecular_function
ENSONIG00000013419	unc-80 homolog (C. elegans)	unc80	102.588	131.308	-1.28041	-0.356608	6.79546	5.71267	0.0168429	0.43036	2	protein_coding	ZDB-GENE-140106-167		I3K6X8;I3K6X7				PTHR31781	UNC 80
ENSONIG00000024464			31.7899	24.2634	1.31027	0.389861	4.89665	5.70885	0.0168796	0.43036	1	lincRNA
ENSONIG00000026610			2.58246	4.34711	-1.69313	-0.759696	1.76792	5.70844	0.0168835	0.43036	2	lincRNA
ENSONIG00000026616			3.3906	5.15179	-1.51519	-0.599494	2.05262	5.71499	0.0168206	0.43036	2	lincRNA
ENSONIG00000014429	solute carrier family 26, member 6, like	slc26a6l	7.35224	10.413	-1.40934	-0.495019	3.2026	5.7047	0.0169195	0.430657	2	protein_coding	ZDB-GENE-080220-10			GO:0008271;GO:0008272;GO:0015116;GO:0055085;GO:0016021;GO:0016020;GO:1902358;GO:0015701;GO:0008510;GO:0006821	secondary active sulfate transmembrane transporter activity;sulfate transport;sulfate transmembrane transporter activity;transmembrane transport;integral component of membrane;membrane;sulfate transmembrane transport;bicarbonate transport;sodium:bicarbonate symporter activity;chloride transport	molecular_function;biological_process;cellular_component	PTHR11814	SOLUTE CARRIER FAMILY 26 MEMBER	GO:0005575;GO:0006810;GO:0055085;GO:0022857;GO:0003674	cellular_component;transport;transmembrane transport;transmembrane transporter activity;molecular_function
ENSONIG00000012156	proliferation-associated protein 2G4	pa2g4b	91.7447	76.8395	1.19395	0.255748	6.39542	5.69482	0.017015	0.432466	1	protein_coding	ZDB-GENE-030131-2182	100711208	I3K2G4	GO:0005737	cytoplasm	cellular_component	PTHR10804_SF89	PROLIFERATION ASSOCIATED 2G4	GO:0005575;GO:0005737	cellular_component;cytoplasm
ENSONIG00000007537	major facilitator superfamily domain containing 8	mfsd8	31.1608	25.586	1.21771	0.284172	4.93054	5.68705	0.0170905	0.43328	1	protein_coding	ZDB-GENE-060818-29			GO:0005215;GO:0055085;GO:0016021;GO:0016020	transporter activity;transmembrane transport;integral component of membrane;membrane	molecular_function;biological_process;cellular_component	PTHR24003_SF41	MAJOR FACILITATOR SUPERFAMILY DOMAIN CONTAINING 8	GO:0005575;GO:0006810;GO:0055085;GO:0003674	cellular_component;transport;transmembrane transport;molecular_function
ENSONIG00000020140	unc-79 homolog, NALCN channel complex subunit	UNC79	75.6592	90.6804	-1.19942	-0.262335	6.3694	5.68649	0.0170961	0.43328	3	protein_coding			I3KW77;I3KW78;I3KW79	GO:0005515	protein binding	molecular_function	PTHR21696	UNC 79 HOMOLOG	GO:0003674	molecular_function
ENSONIG00000000475	extracellular matrix protein 2	ECM2	4.68892	7.49972	-1.59877	-0.676961	2.73598	5.66838	0.0172734	0.433938	1	protein_coding			I3IVG7	GO:0005515	protein binding	molecular_function	PTHR24371_SF56	EXTRACELLULAR MATRIX 2 PRECURSOR	GO:0003674	molecular_function
ENSONIG00000001645	notch 3	notch3	140.897	166.604	-1.1826	-0.241967	7.20846	5.66784	0.0172788	0.433938	2	protein_coding	ZDB-GENE-000329-5			GO:0050793;GO:0030154;GO:0038023;GO:0007275;GO:0007219;GO:0016021;GO:0005509;GO:0006355;GO:0005515;GO:0016020;GO:0046872;GO:0001840;GO:0001889;GO:0002244;GO:0014003;GO:0021514;GO:0021654;GO:0035019;GO:0035633;GO:0035907;GO:0043114;GO:0048259;GO:0048514;GO:0048709;GO:0048793;GO:0048936;GO:0050768;GO:0050880;GO:0060842;GO:0061056;GO:0097150;GO:0098725	regulation of developmental process;cell differentiation;signaling receptor activity;multicellular organism development;Notch signaling pathway;integral component of membrane;calcium ion binding;regulation of transcription, DNA-templated;protein binding;membrane;metal ion binding;neural plate development;liver development;hematopoietic progenitor cell differentiation;oligodendrocyte development;v…	biological_process;molecular_function;cellular_component	PTHR24033_SF47	NEUROGENIC LOCUS NOTCH HOMOLOG 3 PRECURSOR NOTCH 3 [CONTAINS NOTCH 3 EXTRACELLULAR TRUNCATION; NOTCH 3 INTRACELLULAR DOMAIN]	GO:0003674;GO:0043167;GO:0005575;GO:0007165;GO:0048856;GO:0030154;GO:0048646;GO:0008150;GO:0003013;GO:0051301	molecular_function;ion binding;cellular_component;signal transduction;anatomical structure development;cell differentiation;anatomical structure formation involved in morphogenesis;biological_process;circulatory system process;cell division
ENSONIG00000002587	ArfGAP with coiled-coil, ankyrin repeat and PH domains 2	acap2	18.9366	22.9687	-1.21672	-0.282992	4.37451	5.67128	0.0172449	0.433938	1	protein_coding	ZDB-GENE-050208-640			GO:0005096;GO:0005515;GO:0046872;GO:0043547	GTPase activator activity;protein binding;metal ion binding;positive regulation of GTPase activity	molecular_function;biological_process	PTHR23180_SF241	ARF GAP WITH COILED COIL ANK REPEAT AND PH DOMAIN CONTAINING 2 CENTAURIN BETA 2 CNT B2	GO:0003674;GO:0030234;GO:0043167	molecular_function;enzyme regulator activity;ion binding
ENSONIG00000004324	EPH receptor A6	EPHA6	46.3666	57.9077	-1.24864	-0.320359	5.67569	5.67743	0.0171845	0.433938	2	protein_coding		100691266	I3J9B1;I3J9B0	GO:0007169;GO:0005003;GO:0004713;GO:0005887;GO:0016021;GO:0006468;GO:0004672;GO:0005524;GO:0005515;GO:0016020;GO:0016740;GO:0000166;GO:0016301;GO:0016310;GO:0018108;GO:0004714;GO:0048013	transmembrane receptor protein tyrosine kinase signaling pathway;ephrin receptor activity;protein tyrosine kinase activity;integral component of plasma membrane;integral component of membrane;protein phosphorylation;protein kinase activity;ATP binding;protein binding;membrane;transferase activity;nucleotide binding;kinase activity;phosphorylation;peptidyl-tyrosine phosphorylation;transmembrane re…	biological_process;molecular_function;cellular_component	PTHR24416_SF24	EPHRIN TYPE A RECEPTOR 6 PRECURSOR EC_2.7.10.1 EPH HOMOLOGY KINASE 2 EHK 2	GO:0003674;GO:0043167;GO:0016301;GO:0006464;GO:0005575;GO:0007165	molecular_function;ion binding;kinase activity;cellular protein modification process;cellular_component;signal transduction
ENSONIG00000004709	discs, large (Drosophila) homolog-associated protein 3	dlgap3	7.74563	11.0344	-1.42889	-0.5149	3.20577	5.65293	0.0174262	0.433938	1	protein_coding	ZDB-GENE-060503-413			GO:0023052	signaling	biological_process	PTHR12353_SF4	DISKS LARGE ASSOCIATED 3 DAP 3 PSD 95/SAP90 BINDING 3 SAP90/PSD 95 ASSOCIATED 3 SAPAP3	GO:0008150	biological_process
ENSONIG00000006962	5-hydroxytryptamine (serotonin) receptor 2C, G protein-coupled-like 1	htr2cl1	6.96686	9.67471	-1.38927	-0.474328	2.99759	5.66155	0.0173408	0.433938	1	protein_coding	ZDB-GENE-081104-48			GO:0004993;GO:0007631;GO:0005887;GO:0016021;GO:0007186;GO:0004930;GO:0007626;GO:0016020;GO:0007165;GO:0005886;GO:0098664	G protein-coupled serotonin receptor activity;feeding behavior;integral component of plasma membrane;integral component of membrane;G protein-coupled receptor signaling pathway;G protein-coupled receptor activity;locomotory behavior;membrane;signal transduction;plasma membrane;G protein-coupled serotonin receptor signaling pathway	molecular_function;biological_process;cellular_component	PTHR24247	5 HYDROXYTRYPTAMINE RECEPTOR 5 HT 5 SEROTONIN RECEPTOR	GO:0003674;GO:0007165;GO:0005575;GO:0005886	molecular_function;signal transduction;cellular_component;plasma membrane
ENSONIG00000010689	F-box-like/WD repeat-containing protein TBL1XR1		10.2638	13.6054	-1.32307	-0.403892	3.65277	5.65634	0.0173924	0.433938	1	protein_coding		100706341	I3JX45	GO:0005515	protein binding	molecular_function	PTHR22846	F BOX /WD REPEAT CONTAINING TRANSDUCIN BETA 1X 1	GO:0003674	molecular_function
ENSONIG00000012181	low density lipoprotein receptor-related protein 1Ab	lrp1ab	193.242	237.674	-1.23	-0.298662	7.73513	5.65408	0.0174148	0.433938	1	protein_coding	ZDB-GENE-030131-7126			GO:0005509;GO:0005515;GO:0016020;GO:0016021;GO:1901342	calcium ion binding;protein binding;membrane;integral component of membrane;regulation of vasculature development	molecular_function;cellular_component;biological_process	PTHR10529_SF100	PROLOW DENSITY LIPOPROTEIN RECEPTOR RELATED 1 PRECURSOR LRP 1 ALPHA 2 MACROGLOBULIN RECEPTOR A2MR CD91 ANTIGEN [CONTAINS LOW DENSITY LIPOPROTEIN RECEPTOR RELATED 1.85 KDA SUBUNIT LRP 85 ; LOW DENSITY LIPOPROTEIN RECEPTOR RELATED 1.515 KDA SUBUNIT LRP 515 ; LOW DENSITY LIPOPROTEIN RECEPTOR RELATED 1 INTRACELLULAR DOMAIN LRPICD ]	GO:0003674;GO:0043167;GO:0005575	molecular_function;ion binding;cellular_component
ENSONIG00000014622	plexin A3	plxna3	93.5941	121.187	-1.29549	-0.373503	6.68869	5.65145	0.0174409	0.433938	1	protein_coding	ZDB-GENE-070613-1			GO:0071526;GO:0017154;GO:0007165;GO:0005515;GO:0016020;GO:0016021	semaphorin-plexin signaling pathway;semaphorin receptor activity;signal transduction;protein binding;membrane;integral component of membrane	biological_process;molecular_function;cellular_component	PTHR22625	PLEXIN PRECURSOR	GO:0003674;GO:0007165;GO:0005575	molecular_function;signal transduction;cellular_component
ENSONIG00000014677	rho-associated, coiled-coil containing protein kinase 2b	rock2b	16.1721	12.5239	1.28745	0.364514	3.93993	5.66725	0.0172845	0.433938	1	protein_coding	ZDB-GENE-060125-2		I3KBI2	GO:0007266;GO:0006939;GO:0017048;GO:0032956;GO:0030036;GO:0035556;GO:0004674;GO:0006468;GO:0004672;GO:0005524;GO:0010825;GO:0016740;GO:0000166;GO:0016301;GO:0016310;GO:0046872	Rho protein signal transduction;smooth muscle contraction;Rho GTPase binding;regulation of actin cytoskeleton organization;actin cytoskeleton organization;intracellular signal transduction;protein serine/threonine kinase activity;protein phosphorylation;protein kinase activity;ATP binding;positive regulation of centrosome duplication;transferase activity;nucleotide binding;kinase activity;phospho…	biological_process;molecular_function	PTHR22988	RHO ASSOCIATED KINASE EC_2.7.11.1 RHO ASSOCIATED COILED COIL CONTAINING KINASE RHO ASSOCIATED COILED COIL CONTAINING KINASE ROCK ROCK	GO:0003674;GO:0043167;GO:0016301;GO:0006464;GO:0007165;GO:0007010	molecular_function;ion binding;kinase activity;cellular protein modification process;signal transduction;cytoskeleton organization	04151+2.7.11.1;04150+2.7.11.1;05165+2.7.11.1;04926+2.7.11.1;04714+2.7.11.1;05170+2.7.11.1;05163+2.7.11.1
ENSONIG00000014805	galectin-9	lgals9l3	52.8151	39.9714	1.32	0.400537	5.61861	5.66065	0.0173497	0.433938	1	protein_coding	ZDB-GENE-040718-159	100702318	I3KBZ5	GO:0030246	carbohydrate binding	molecular_function	PTHR11346_SF80	GALECTIN GAL	GO:0003674	molecular_function
ENSONIG00000019276			132.521	160.749	-1.21281	-0.278359	7.23982	5.65764	0.0173795	0.433938	1	protein_coding				GO:0005515	protein binding	molecular_function	PTHR24373_SF9	LEUCINE RICH REPEAT NEURONAL 2 PRECURSOR GLIOMA AMPLIFIED ON CHROMOSOME 1 LEUCINE RICH REPEAT NEURONAL 5	GO:0003674	molecular_function
ENSONIG00000024397			1.30007	0.472342	2.73449	1.45127	0.359336	5.66736	0.0172834	0.433938	1	lincRNA
ENSONIG00000012785	glutamate receptor, ionotropic, N-methyl D-aspartate 2D, b	grin2db	11.3388	15.6994	-1.38569	-0.4706	3.72744	5.64275	0.0175277	0.434873	1	protein_coding	ZDB-GENE-100920-7			GO:0016020;GO:0016021	membrane;integral component of membrane	cellular_component	PTHR18966_SF105	GLUTAMATE RECEPTOR IONOTROPIC NMDA 2D PRECURSOR GLUN2D GLUTAMATE [NMDA] RECEPTOR SUBUNIT EPSILON 4 N METHYL D ASPARTATE RECEPTOR SUBTYPE 2D NMDAR2D NR2D	GO:0005575	cellular_component
ENSONIG00000015859	synaptopodin 2-like b	synpo2lb	0.665558	1.31948	-1.96268	-0.972827	0.146415	5.64298	0.0175254	0.434873	1	protein_coding	ZDB-GENE-090828-5			GO:0005515;GO:0007519;GO:0048738	protein binding;skeletal muscle tissue development;cardiac muscle tissue development	molecular_function;biological_process	PTHR24217	SYNAPTOPODIN	GO:0003674;GO:0048856	molecular_function;anatomical structure development
ENSONIG00000004693	T cell lymphoma invasion and metastasis 1a	tiam1a	68.4459	82.7081	-1.20817	-0.272823	6.23915	5.62646	0.0176914	0.43815	1	protein_coding	ZDB-GENE-080325-1			GO:0005085;GO:0035556;GO:0035023;GO:0005089;GO:0007165;GO:0005515;GO:0090630	guanyl-nucleotide exchange factor activity;intracellular signal transduction;regulation of Rho protein signal transduction;Rho guanyl-nucleotide exchange factor activity;signal transduction;protein binding;activation of GTPase activity	molecular_function;biological_process	PTHR22826_SF88	T LYMPHOMA INVASION AND METASTASIS INDUCING 1 TIAM 1	GO:0003674;GO:0007165	molecular_function;signal transduction
ENSONIG00000020611	NHL repeat containing E3 ubiquitin protein ligase 1	NHLRC1	3.72378	5.68496	-1.52021	-0.604271	2.30429	5.62468	0.0177093	0.43815	1	protein_coding			I3KXS0	GO:0005515	protein binding	molecular_function	TF662962	E3 UBIQUITIN LIGASE NHLRC1 EC_2.3.2.27 MALIN NHL REPEAT CONTAINING 1 RING TYPE E3 UBIQUITIN TRANSFERASE NHLRC1	GO:0003674	molecular_function
ENSONIG00000008299	myosin-10	MYH10	116.694	134.834	-1.15508	-0.207999	6.99462	5.61411	0.0178165	0.439603	2	protein_coding		100690099		GO:0016459;GO:0003774;GO:0051015;GO:0005524;GO:0005515;GO:0000166;GO:0003779	myosin complex;motor activity;actin filament binding;ATP binding;protein binding;nucleotide binding;actin binding	cellular_component;molecular_function	PTHR13140_SF328	MYOSIN 10 CELLULAR MYOSIN HEAVY CHAIN TYPE B MYOSIN HEAVY CHAIN 10 MYOSIN HEAVY CHAIN NON MUSCLE IIB NON MUSCLE MYOSIN HEAVY CHAIN B NMMHC B NON MUSCLE MYOSIN HEAVY CHAIN IIB NMMHC II B NMMHC IIB	GO:0003674;GO:0043167;GO:0008092;GO:0032991;GO:0005575;GO:0043226;GO:0005856	molecular_function;ion binding;cytoskeletal protein binding;protein-containing complex;cellular_component;organelle;cytoskeleton
ENSONIG00000023676			46.5166	28.2372	1.64665	0.719532	5.21018	5.61399	0.0178177	0.439603	3	lincRNA
ENSONIG00000008003			2.03186	1.02341	1.97899	0.984762	0.684183	5.60602	0.0178988	0.440989	1	protein_coding				GO:0008270;GO:0005515;GO:0046872	zinc ion binding;protein binding;metal ion binding	molecular_function	PTHR24103_SF245	AMBIGUOUS	GO:0003674;GO:0043167	molecular_function;ion binding
ENSONIG00000007301	si:ch73-60h1.1	si:ch73-60h1.1	43.8666	54.4165	-1.24131	-0.311864	5.6105	5.60251	0.0179347	0.44126	2	protein_coding	ZDB-GENE-140106-152			GO:0006468;GO:0004672;GO:0005524;GO:0000166;GO:0004674	protein phosphorylation;protein kinase activity;ATP binding;nucleotide binding;protein serine/threonine kinase activity	biological_process;molecular_function	PTHR24349_SF110	CALCIUM/CALMODULIN DEPENDENT KINASE TYPE IV	GO:0003674;GO:0043167;GO:0016301;GO:0006464	molecular_function;ion binding;kinase activity;cellular protein modification process
ENSONIG00000000290	phosphatidylinositol-4-phosphate 3-kinase, catalytic subunit type 2 beta	pik3c2b	52.3036	63.4429	-1.21414	-0.27993	5.82331	5.5991	0.0179697	0.441302	1	protein_coding	ZDB-GENE-050309-145			GO:0048015;GO:0046854;GO:0035091;GO:0016301;GO:0016740;GO:0016310	phosphatidylinositol-mediated signaling;phosphatidylinositol phosphorylation;phosphatidylinositol binding;kinase activity;transferase activity;phosphorylation	biological_process;molecular_function	PTHR10048_SF30	PHOSPHATIDYLINOSITOL 4 PHOSPHATE 3 KINASE C2 DOMAIN CONTAINING SUBUNIT BETA PI3K C2 BETA PTDINS 3 KINASE C2 SUBUNIT BETA EC_2.7.1.154 C2 PI3K PHOSPHOINOSITIDE 3 KINASE C2 BETA	GO:0016301;GO:0003674;GO:0043167;GO:0008289;GO:0006629;GO:0007165	kinase activity;molecular_function;ion binding;lipid binding;lipid metabolic process;signal transduction
ENSONIG00000004430	speckle type BTB/POZ protein like	spopla	43.7488	36.3149	1.20564	0.269794	5.35137	5.59748	0.0179864	0.441302	1	protein_coding	ZDB-GENE-050320-3	100703977	I3J9N6	GO:0005515	protein binding	molecular_function	PTHR24413_SF91	SPECKLE TYPE POZ HIB HOMOLOG	GO:0003674	molecular_function
ENSONIG00000018271	zinc finger C3H1-type containing	ZFC3H1	9.1584	12.1205	-1.32401	-0.404919	3.33499	5.5863	0.0181015	0.443512	1	protein_coding				GO:0000178;GO:0006396;GO:0003723;GO:0005515	exosome (RNase complex);RNA processing;RNA binding;protein binding	cellular_component;biological_process;molecular_function	PTHR21563	AMBIGUOUS	GO:0003674;GO:0003723;GO:0034641;GO:0032991;GO:0005575	molecular_function;RNA binding;cellular nitrogen compound metabolic process;protein-containing complex;cellular_component
ENSONIG00000000538	copine 1	cpne1	95.4403	63.2503	1.50913	0.593722	6.33337	5.57238	0.018246	0.443676	1	protein_coding	ZDB-GENE-030131-3562	100697955	I3IVP5				PTHR10857_SF2	COPINE 1 COPINE I
ENSONIG00000002831	spalt like transcription factor 1	sall1a	52.6815	41.9312	1.2555	0.328267	5.53299	5.57418	0.0182272	0.443676	2	protein_coding	ZDB-GENE-020228-2	100702409	I3J3V9;I3J3W0	GO:0003676;GO:0035118;GO:0045743	nucleic acid binding;embryonic pectoral fin morphogenesis;positive regulation of fibroblast growth factor receptor signaling pathway	molecular_function;biological_process	PTHR23233_SF51	SAL 1 ZINC FINGER SPALT SAL	GO:0003674	molecular_function
ENSONIG00000004336	myosin IB	myo1b	464.237	546.14	-1.17631	-0.234268	8.98662	5.57653	0.0182028	0.443676	2	protein_coding	ZDB-GENE-030131-695	100710837	I3J9C5;I3J9C6	GO:0016459;GO:0003774;GO:0005524;GO:0005515;GO:0000166;GO:0003779	myosin complex;motor activity;ATP binding;protein binding;nucleotide binding;actin binding	cellular_component;molecular_function	PTHR13140_SF277	UNCONVENTIONAL MYOSIN IB MYOSIN I ALPHA MMI ALPHA MMIA	GO:0003674;GO:0043167;GO:0032991;GO:0005575;GO:0043226;GO:0005856;GO:0008092	molecular_function;ion binding;protein-containing complex;cellular_component;organelle;cytoskeleton;cytoskeletal protein binding
ENSONIG00000007523	suppressor of cytokine signaling 2	socs2	0.466918	1.15815	-2.46189	-1.29976	-0.216055	5.58112	0.0181551	0.443676	1	protein_coding		100708174	I3JKU5	GO:0035556;GO:0001558;GO:0005737;GO:0046426;GO:0005159;GO:0008269;GO:0016567	intracellular signal transduction;regulation of cell growth;cytoplasm;negative regulation of receptor signaling pathway via JAK-STAT;insulin-like growth factor receptor binding;JAK pathway signal transduction adaptor activity;protein ubiquitination	biological_process;cellular_component;molecular_function	PTHR10385_SF27	SUPPRESSOR OF CYTOKINE SIGNALING 2 SOCS 2 CYTOKINE INDUCIBLE SH2 2 CIS 2	GO:0005575;GO:0005737;GO:0007165;GO:0003674;GO:0030674;GO:0006464	cellular_component;cytoplasm;signal transduction;molecular_function;protein binding, bridging;cellular protein modification process
ENSONIG00000010528	ST3 beta-galactoside alpha-2,3-sialyltransferase 3b	st3gal3b	22.1222	16.3018	1.35837	0.441877	4.30542	5.57116	0.0182587	0.443676	1	protein_coding	ZDB-GENE-050411-13			GO:0006486;GO:0008373;GO:0016020;GO:0016021;GO:0016740;GO:0016757;GO:0005794;GO:0097503	protein glycosylation;sialyltransferase activity;membrane;integral component of membrane;transferase activity;transferase activity, transferring glycosyl groups;Golgi apparatus;sialylation	biological_process;molecular_function;cellular_component	PTHR13713_SF6	CMP N ACETYLNEURAMINATE BETA 1 4 GALACTOSIDE ALPHA 2 3 SIALYLTRANSFERASE EC_2.4.99.6 BETA GALACTOSIDE ALPHA 2 3 SIALYLTRANSFERASE 3 ALPHA 2 3 ST 3 GAL BETA 1 3 4 GLCNAC ALPHA 2 3 SIALYLTRANSFERASE N ACETYLLACTOSAMINIDE ALPHA 2 3 SIALYLTRANSFERASE ST3GAL III ST3GALIII ST3N SIALYLTRANSFERASE 6	GO:0016757;GO:0006464;GO:0005575;GO:0043226;GO:0005794	transferase activity, transferring glycosyl groups;cellular protein modification process;cellular_component;organelle;Golgi apparatus
ENSONIG00000025099			4.12557	6.40232	-1.54716	-0.629626	2.398	5.57795	0.018188	0.443676	1	lincRNA
ENSONIG00000006448	threonine synthase like 1	THNSL1	4.4026	7.17117	-1.63105	-0.705799	2.41937	5.5661	0.0183115	0.443741	1	protein_coding		100690353	I3JGY7	GO:0006520;GO:0030170	cellular amino acid metabolic process;pyridoxal phosphate binding	biological_process;molecular_function	PTHR10314_SF1	THREONINE SYNTHASE	GO:0003674;GO:0043167;GO:0044281;GO:0006520	molecular_function;ion binding;small molecule metabolic process;cellular amino acid metabolic process	00400+2.7.1.71
ENSONIG00000011361	glucosamine-6-phosphate deaminase 2		46.3095	38.1768	1.21427	0.280085	5.51115	5.56763	0.0182955	0.443741	1	protein_coding		100698532	I3JZK4	GO:0005975;GO:0006044;GO:0004342;GO:0005737;GO:0016787	carbohydrate metabolic process;N-acetylglucosamine metabolic process;glucosamine-6-phosphate deaminase activity;cytoplasm;hydrolase activity	biological_process;molecular_function;cellular_component	PTHR11280	GLUCOSAMINE 6 PHOSPHATE ISOMERASE EC_3.5.99.6 GLUCOSAMINE 6 PHOSPHATE DEAMINASE GNPDA GLCN6P DEAMINASE	GO:0005975;GO:0016853;GO:0005575;GO:0005737	carbohydrate metabolic process;isomerase activity;cellular_component;cytoplasm	00520+3.5.99.6
ENSONIG00000018809	TATA box binding protein (Tbp)-associated factor, RNA polymerase I, B	taf1b	5.83806	4.03355	1.45354	0.53957	2.35536	5.56094	0.0183656	0.444442	2	protein_coding	ZDB-GENE-041008-2			GO:0001164;GO:0001188;GO:0006360;GO:0070860	RNA polymerase I CORE element sequence-specific DNA binding;RNA polymerase I preinitiation complex assembly;transcription by RNA polymerase I;RNA polymerase I core factor complex	molecular_function;biological_process;cellular_component	PTHR31576	TATA BOX BINDING ASSOCIATED FACTOR RNA POLYMERASE I SUBUNIT B RNA POLYMERASE I SPECIFIC TBP ASSOCIATED FACTOR KDA TATA BOX BINDING ASSOCIATED FACTOR 1B TBP ASSOCIATED FACTOR 1B TRANSCRIPTION INITIATION FACTOR SL1/TIF IB SUBUNIT B	GO:0003674;GO:0003677;GO:0009058;GO:0034641;GO:0032991;GO:0005575	molecular_function;DNA binding;biosynthetic process;cellular nitrogen compound metabolic process;protein-containing complex;cellular_component
ENSONIG00000007418			2.20484	0.391095	5.66295	2.50155	0.755388	5.55151	0.0184648	0.446232	1	protein_coding				GO:0016567;GO:0004842;GO:0008270;GO:0046872	protein ubiquitination;ubiquitin-protein transferase activity;zinc ion binding;metal ion binding	biological_process;molecular_function	PTHR24103_SF249	AMBIGUOUS	GO:0003674;GO:0043167;GO:0006464	molecular_function;ion binding;cellular protein modification process
ENSONIG00000008121	proteasome activator subunit 1	psme1	19.6064	14.9341	1.31493	0.394981	4.0267	5.54402	0.0185439	0.447533	1	protein_coding	ZDB-GENE-991110-17	100705986	I3JMY4	GO:0008537	proteasome activator complex	cellular_component	PTHR10660	PROTEASOME ACTIVATOR COMPLEX SUBUNIT 11S REGULATOR COMPLEX SUBUNIT REG ACTIVATOR OF MULTICATALYTIC PROTEASE SUBUNIT PROTEASOME ACTIVATOR 28 SUBUNIT	GO:0032991;GO:0005575	protein-containing complex;cellular_component
ENSONIG00000005957	STEAP family member 4	steap4	4.55399	2.3862	1.90365	0.928768	1.92543	5.53656	0.0186232	0.448767	1	protein_coding	ZDB-GENE-070424-244		I3JF62	GO:0016020;GO:0016021	membrane;integral component of membrane	cellular_component	PTHR14239	METALLOREDUCTASE SIX TRANSMEMBRANE EPITHELIAL ANTIGEN OF PROSTATE	GO:0005575	cellular_component
ENSONIG00000006526	thrombospondin type 1 domain containing 7A	thsd7ab	54.0216	62.9396	-1.16516	-0.220533	5.92287	5.53444	0.0186458	0.448767	2	protein_coding	ZDB-GENE-130530-999	100700296	I3JH87;I3JH86	GO:0016020;GO:0016021	membrane;integral component of membrane	cellular_component	PTHR11311_SF8	THROMBOSPONDIN TYPE 1 DOMAIN CONTAINING 7A PRECURSOR[CONTAINS THROMBOSPONDIN TYPE 1 DOMAIN CONTAINING 7A SOLUBLE FORM]	GO:0005575	cellular_component
ENSONIG00000000752	plastin 1 (I isoform)	pls1	1.82199	5.03353	-2.75775	-1.46349	1.81305	5.52079	0.0187917	0.450442	2	protein_coding	ZDB-GENE-030131-6205			GO:0051017;GO:0051015;GO:0005509;GO:0005515;GO:0003779	actin filament bundle assembly;actin filament binding;calcium ion binding;protein binding;actin binding	biological_process;molecular_function	PTHR19961	PLASTIN	GO:0003674;GO:0043167;GO:0008092;GO:0022607	molecular_function;ion binding;cytoskeletal protein binding;cellular component assembly
ENSONIG00000019241	serine/threonine-protein phosphatase 6 regulatory ankyrin repeat subunit C		8.67156	11.1445	-1.28797	-0.365104	3.46449	5.52231	0.0187754	0.450442	1	protein_coding		100689913	I3KSW8	GO:0005515	protein binding	molecular_function	PTHR24158	SERINE/THREONINE PHOSPHATASE 6 REGULATORY ANKYRIN REPEAT SUBUNIT PP6 ARS SERINE/THREONINE PHOSPHATASE 6 REGULATORY SUBUNIT ARS ANKYRIN REPEAT DOMAIN CONTAINING	GO:0003674	molecular_function
ENSONIG00000019594	mediator complex subunit 6	med6	13.7255	10.3292	1.3272	0.408391	3.57569	5.5234	0.0187638	0.450442	1	protein_coding	ZDB-GENE-040625-61	100697418	I3KU73	GO:0016592;GO:0003712;GO:0006357;GO:0005634	mediator complex;transcription coregulator activity;regulation of transcription by RNA polymerase II;nucleus	cellular_component;molecular_function;biological_process	PTHR13104	MEDIATOR OF RNA POLYMERASE II TRANSCRIPTION SUBUNIT 6 MEDIATOR COMPLEX SUBUNIT 6	GO:0003674;GO:0032991;GO:0005575;GO:0043226;GO:0005634	molecular_function;protein-containing complex;cellular_component;organelle;nucleus
ENSONIG00000001111	VIP peptides	VIP	51.8875	40.3235	1.28905	0.366311	5.70421	5.51279	0.0188779	0.450873	1	protein_coding		100705021	I3IXR7	GO:0005179;GO:0005576;GO:0010469;GO:0048255;GO:0070459	hormone activity;extracellular region;regulation of signaling receptor activity;mRNA stabilization;prolactin secretion	molecular_function;cellular_component;biological_process	PTHR11213	GROWTH HORMONE RELEASING FACTOR GRF GROWTH HORMONE RELEASING HORMONE GHRH	GO:0005575;GO:0005576;GO:0003674;GO:0008150;GO:0006810	cellular_component;extracellular region;molecular_function;biological_process;transport
ENSONIG00000007021	solute carrier family 2 (facilitated glucose transporter), member 3a	slc2a3a	274.801	347.735	-1.26551	-0.339721	8.34064	5.5152	0.0188519	0.450873	2	protein_coding	ZDB-GENE-040718-390			GO:0005215;GO:0055085;GO:0022857;GO:0016021;GO:0016020	transporter activity;transmembrane transport;transmembrane transporter activity;integral component of membrane;membrane	molecular_function;biological_process;cellular_component	PTHR24063_SF304	SOLUTE CARRIER FAMILY 2 FACILITATED GLUCOSE TRANSPORTER MEMBER 3 GLUCOSE TRANSPORTER TYPE 3 BRAIN GLUT 3	GO:0005575;GO:0022857;GO:0003674;GO:0006810;GO:0055085	cellular_component;transmembrane transporter activity;molecular_function;transport;transmembrane transport
ENSONIG00000010270	DnaJ heat shock protein family (Hsp40) member C12	dnajc12	42.9558	33.9999	1.26534	0.339528	5.36487	5.51202	0.0188862	0.450873	2	protein_coding	ZDB-GENE-070801-3	100701075	I3JVM0;I3JVL9				PTHR24078_SF137	DNAJ HOMOLOG SUBFAMILY C MEMBER 12 J DOMAIN CONTAINING 1
ENSONIG00000007087	C-myc promoter-binding protein	DENND4A	43.4448	56.0615	-1.29207	-0.369689	5.52036	5.49934	0.0190237	0.452661	2	protein_coding		100702482	I3JJA0;I3JJ99	GO:0005515	protein binding	molecular_function	PTHR12296_SF16	C MYC PROMOTER BINDING DENN DOMAIN CONTAINING 4A	GO:0003674	molecular_function
ENSONIG00000008307	brain aromatase	CYP19A1 (1 of many)	444.697	323.227	1.37584	0.460308	8.55382	5.49803	0.0190379	0.452661	1	protein_coding		100534396	I3JNK7	GO:0020037;GO:0016705;GO:0005506;GO:0055114;GO:0016020;GO:0016021;GO:0016491;GO:0046872;GO:0004497	heme binding;oxidoreductase activity, acting on paired donors, with incorporation or reduction of molecular oxygen;iron ion binding;oxidation-reduction process;membrane;integral component of membrane;oxidoreductase activity;metal ion binding;monooxygenase activity	molecular_function;biological_process;cellular_component	PTHR24290_SF57	AROMATASE EC_1.14.14.14 CYPXIX CYTOCHROME P 450AROM CYTOCHROME P450 19A1 ESTROGEN SYNTHASE	GO:0003674;GO:0043167;GO:0016491;GO:0005575	molecular_function;ion binding;oxidoreductase activity;cellular_component
ENSONIG00000022217		RF01241	0.493371	1.31974	-2.7111	-1.43888	-0.0800452	5.49945	0.0190224	0.452661	1	snoRNA
ENSONIG00000005875	zic family member 1 (odd-paired homolog, Drosophila)	zic1	33.1055	26.6174	1.24434	0.315382	4.91962	5.48632	0.0191659	0.455093	1	protein_coding	ZDB-GENE-000208-4			GO:0003676;GO:0007420;GO:0021534;GO:0021592;GO:0030902;GO:0048853;GO:0060059	nucleic acid binding;brain development;cell proliferation in hindbrain;fourth ventricle development;hindbrain development;forebrain morphogenesis;embryonic retina morphogenesis in camera-type eye	molecular_function;biological_process	PTHR19818_SF26	ZINC FINGER ZIC 1 ZINC FINGER OF THE CEREBELLUM 1	GO:0003674;GO:0048856;GO:0008283	molecular_function;anatomical structure development;cell population proliferation
ENSONIG00000014489	phosphatidylinositol glycan anchor biosynthesis class N	pign	7.9198	10.9839	-1.37797	-0.462541	3.30994	5.47767	0.0192609	0.456736	1	protein_coding	ZDB-GENE-080204-114	100690276	I3KAT2	GO:0006506;GO:0005789;GO:0016740;GO:0003824;GO:0016021;GO:0051377;GO:0016020	GPI anchor biosynthetic process;endoplasmic reticulum membrane;transferase activity;catalytic activity;integral component of membrane;mannose-ethanolamine phosphotransferase activity;membrane	biological_process;cellular_component;molecular_function	PTHR12250	GPI ETHANOLAMINE PHOSPHATE TRANSFERASE 1 EC 2	GO:0005575;GO:0003674;GO:0009058;GO:0006464;GO:0006629	cellular_component;molecular_function;biosynthetic process;cellular protein modification process;lipid metabolic process
ENSONIG00000006602	uncharacterized LOC100693091		4.16598	7.05218	-1.7052	-0.769937	2.6398	5.46693	0.0193796	0.457471	3	protein_coding		100693091	I3JHJ2;I3JHJ1;I3JHJ3				PTHR19277	PRECURSOR
ENSONIG00000007720	probable histone deacetylase 1-B	hdac1	161.904	138.524	1.16889	0.225135	7.2757	5.46953	0.0193508	0.457471	1	protein_coding	ZDB-GENE-020419-32	100691799	I3JLI6	GO:0016575;GO:0004407;GO:0005634;GO:0016787;GO:0046872;GO:0006325;GO:0032041;GO:0070932;GO:0001764;GO:0001889;GO:0002244;GO:0008285;GO:0009953;GO:0016055;GO:0021754;GO:0021903;GO:0030318;GO:0031017;GO:0031101;GO:0033687;GO:0048263;GO:0048565;GO:0048706;GO:0048709;GO:0048935;GO:0050673;GO:0050769;GO:0060028;GO:0060042;GO:0060218	histone deacetylation;histone deacetylase activity;nucleus;hydrolase activity;metal ion binding;chromatin organization;NAD-dependent histone deacetylase activity (H3-K14 specific);histone H3 deacetylation;neuron migration;liver development;hematopoietic progenitor cell differentiation;negative regulation of cell population proliferation;dorsal/ventral pattern formation;Wnt signaling pathway;facia…	biological_process;molecular_function;cellular_component	PTHR10625_SF113	HISTONE DEACETYLASE 1 HD1 EC_3.5.1.98	GO:0016810;GO:0006464;GO:0005575;GO:0043226;GO:0005634;GO:0003674;GO:0043167;GO:0048870;GO:0040011;GO:0048856;GO:0030154;GO:0007165;GO:0040007;GO:0008283;GO:0009790	hydrolase activity, acting on carbon-nitrogen (but not peptide) bonds;cellular protein modification process;cellular_component;organelle;nucleus;molecular_function;ion binding;cell motility;locomotion;anatomical structure development;cell differentiation;signal transduction;growth;cell population proliferation;embryo development
ENSONIG00000013252	POF1B, actin binding protein	pof1b	1.25566	2.78845	-2.22149	-1.15153	0.881207	5.46794	0.0193685	0.457471	2	protein_coding	ZDB-GENE-030131-4287						PTHR22546	POF1B
ENSONIG00000023868			19.708	28.9147	-1.46881	-0.554647	4.47847	5.46551	0.0193953	0.457471	2	lincRNA
ENSONIG00000000374			0.096203	0.422952	-3.99818	-1.99934	-0.832074	5.46203	0.019434	0.457773	1	protein_coding							PTHR11412_SF88	ALPHA 2 MACROGLOBULIN
ENSONIG00000001614	collagen, type V, alpha 3a	col5a3a	9.16714	13.4163	-1.46499	-0.550895	3.66281	5.45229	0.0195426	0.459265	2	protein_coding	ZDB-GENE-030131-968			GO:0005201	extracellular matrix structural constituent	molecular_function	PTHR24023_SF42;PTHR24023_SF478	COLLAGEN ALPHA 1 XI CHAIN PRECURSOR;UNCHARACTERIZED	GO:0003674;GO:0005198	molecular_function;structural molecule activity
ENSONIG00000002035	ubiquitin protein ligase E3 component n-recognin 4	ubr4	133.076	158.004	-1.18773	-0.248207	7.18646	5.44608	0.0196123	0.459265	1	protein_coding	ZDB-GENE-090313-341			GO:0008270;GO:0005515	zinc ion binding;protein binding	molecular_function	PTHR21725	E3 UBIQUITIN LIGASE UBR4 EC_2.3.2.27 N RECOGNIN 4 RING TYPE E3 UBIQUITIN TRANSFERASE UBR4 ZINC FINGER UBR1 TYPE 1	GO:0003674;GO:0043167	molecular_function;ion binding
ENSONIG00000002210	trinucleotide repeat containing 6C1	tnrc6c1	48.2396	60.3631	-1.2521	-0.324351	5.70479	5.44097	0.0196697	0.459265	3	protein_coding	ZDB-GENE-030131-7440			GO:0035278;GO:0003676;GO:0005515	miRNA mediated inhibition of translation;nucleic acid binding;protein binding	biological_process;molecular_function	PTHR13020_SF9	TRINUCLEOTIDE REPEAT CONTAINING GENE 6C	GO:0003674	molecular_function
ENSONIG00000007792	proline rich 12b	prr12b	102.406	138.775	-1.35503	-0.438323	6.90884	5.44574	0.0196161	0.459265	1	protein_coding	ZDB-GENE-130625-2						PTHR14709	GLUTAMINE AND SERINE RICH 1
ENSONIG00000008909			35.4369	46.7145	-1.31745	-0.397751	5.32947	5.4429	0.019648	0.459265	1	protein_coding				GO:0007169;GO:0005003;GO:0004713;GO:0005887;GO:0016021;GO:0006468;GO:0004672;GO:0005524;GO:0005515;GO:0016020;GO:0016740;GO:0000166;GO:0016301;GO:0016310;GO:0018108;GO:0004714;GO:0048013	transmembrane receptor protein tyrosine kinase signaling pathway;ephrin receptor activity;protein tyrosine kinase activity;integral component of plasma membrane;integral component of membrane;protein phosphorylation;protein kinase activity;ATP binding;protein binding;membrane;transferase activity;nucleotide binding;kinase activity;phosphorylation;peptidyl-tyrosine phosphorylation;transmembrane re…	biological_process;molecular_function;cellular_component	PTHR24416_SF173	EPHRIN TYPE B RECEPTOR 1 EC_2.7.10.1 TYROSINE KINASE RECEPTOR	GO:0003674;GO:0043167;GO:0016301;GO:0006464;GO:0005575;GO:0007165	molecular_function;ion binding;kinase activity;cellular protein modification process;cellular_component;signal transduction
ENSONIG00000017444	nuclear receptor coactivator 6	ncoa6	100.167	122.723	-1.22523	-0.293057	6.82375	5.44831	0.0195873	0.459265	1	protein_coding	ZDB-GENE-080403-12			GO:0003713;GO:0005634;GO:1903508	transcription coactivator activity;nucleus;positive regulation of nucleic acid-templated transcription	molecular_function;cellular_component;biological_process	PTHR15690	NUCLEAR RECEPTOR COACTIVATOR 6 ACTIVATING SIGNAL COINTEGRATOR 2 ASC 2 AMPLIFIED IN BREAST CANCER 3 CANCER AMPLIFIED TRANSCRIPTIONAL COACTIVATOR ASC 2 NUCLEAR RECEPTOR COACTIVATOR RAP250 NRC NUCLEAR RECEPTOR ACTIVATING PROTEIN 250 KDA PEROXISOME PROLIFERATOR ACTIVATED RECEPTOR INTERACTING PPAR INTERACTING THYROID HORMONE RECEPTOR BINDING	GO:0005575;GO:0043226;GO:0005634;GO:0003674	cellular_component;organelle;nucleus;molecular_function
ENSONIG00000019160	low density lipoprotein receptor-related protein 1Aa	lrp1aa	131.641	169.268	-1.28636	-0.363298	7.14045	5.44014	0.0196791	0.459265	1	protein_coding	ZDB-GENE-030131-7889			GO:0005509;GO:0005515;GO:0016020;GO:0016021;GO:1901342	calcium ion binding;protein binding;membrane;integral component of membrane;regulation of vasculature development	molecular_function;cellular_component;biological_process	PTHR10529_SF100	PROLOW DENSITY LIPOPROTEIN RECEPTOR RELATED 1 PRECURSOR LRP 1 ALPHA 2 MACROGLOBULIN RECEPTOR A2MR CD91 ANTIGEN [CONTAINS LOW DENSITY LIPOPROTEIN RECEPTOR RELATED 1.85 KDA SUBUNIT LRP 85 ; LOW DENSITY LIPOPROTEIN RECEPTOR RELATED 1.515 KDA SUBUNIT LRP 515 ; LOW DENSITY LIPOPROTEIN RECEPTOR RELATED 1 INTRACELLULAR DOMAIN LRPICD ]	GO:0003674;GO:0043167;GO:0005575	molecular_function;ion binding;cellular_component
ENSONIG00000003657	cytidine monophosphate (UMP-CMP) kinase 2, mitochondrial	cmpk2	6.484	3.14195	2.05994	1.0426	2.63539	5.42358	0.0198666	0.46	1	protein_coding	ZDB-GENE-040724-24						PTHR10344	THYMIDYLATE KINASE EC_2.7.4.9 DTMP KINASE			00240+2.7.4.9
ENSONIG00000007292	fatty acid synthase	fasn	113.69	134.202	-1.18062	-0.239542	6.86373	5.42724	0.019825	0.46	1	protein_coding	ZDB-GENE-030131-7802			GO:0016788;GO:0016740;GO:0009058;GO:0003824;GO:0016491;GO:0004312;GO:0031177;GO:0055114;GO:0061959	hydrolase activity, acting on ester bonds;transferase activity;biosynthetic process;catalytic activity;oxidoreductase activity;fatty acid synthase activity;phosphopantetheine binding;oxidation-reduction process;response to (R)-carnitine	molecular_function;biological_process	PTHR11712_SF227	FATTY ACID SYNTHASE EC_2.3.1.85 [INCLUDES [ACYL CARRIER PROTEIN] S ACETYLTRANSFERASE EC_2.3.1.- 38 ; [ACYL CARRIER PROTEIN] S MALONYLTRANSFERASE EC_2.3.-.- 1 39 ; 3 OXOACYL [ACYL CARRIER PROTEIN] SYNTHASE EC 2.3.1.41 ; 3 OXOACYL [ACYL CARRIER PROTEIN] REDUCTASE EC 1.1.1.- 100 ; 3 HYDROXYACYL [ACYL CARRIER PROTEIN] DEHYDRATASE EC 4.2.-.- 1 59 ; ENOYL [ACYL CARRIER PROTEIN] REDUCTASE EC 1 3 1 39 ; …	GO:0016491;GO:0003674;GO:0009058;GO:0016746;GO:0043167	oxidoreductase activity;molecular_function;biosynthetic process;transferase activity, transferring acyl groups;ion binding	00780+1.1.1.100+4.2.1.59+2.3.1.41;00061+1.1.1.100+2.3.1.85+2.3.1.39+4.2.1.59+2.3.1.41+3.1.2.14
ENSONIG00000016024	teneurin transmembrane protein 3	tenm3	0.631325	1.32049	-2.0858	-1.0606	-0.116847	5.42487	0.0198519	0.46	2	protein_coding	ZDB-GENE-990714-19			GO:0005887;GO:0016021;GO:0007165	integral component of plasma membrane;integral component of membrane;signal transduction	cellular_component;biological_process	PTHR11219	TENEURIN TEN ODD OZ/TEN M HOMOLOG TENASCIN TEN TENEURIN TRANSMEMBRANE	GO:0007165;GO:0005575	signal transduction;cellular_component
ENSONIG00000016899	coiled-coil domain containing 187	ccdc187	25.2597	31.753	-1.26088	-0.334433	4.83605	5.42514	0.0198489	0.46	2	protein_coding	ZDB-GENE-070410-81						PTHR22115	COILED COIL DOMAIN CONTAINING 50
ENSONIG00000016925			35.3773	46.9365	-1.32556	-0.406599	5.37889	5.42506	0.0198497	0.46	1	protein_coding				GO:0070509;GO:0030317;GO:0019228;GO:0008332;GO:0005891;GO:0070588;GO:0005245;GO:0005216;GO:0006811;GO:0055085;GO:0016020;GO:0016021;GO:0005244;GO:0034765;GO:0005262;GO:0006816	calcium ion import;flagellated sperm motility;neuronal action potential;low voltage-gated calcium channel activity;voltage-gated calcium channel complex;calcium ion transmembrane transport;voltage-gated calcium channel activity;ion channel activity;ion transport;transmembrane transport;membrane;integral component of membrane;voltage-gated ion channel activity;regulation of ion transmembrane trans…	biological_process;molecular_function;cellular_component	PTHR10037_SF202	VOLTAGE DEPENDENT T TYPE CALCIUM CHANNEL SUBUNIT ALPHA 1I VOLTAGE GATED CALCIUM CHANNEL SUBUNIT ALPHA CAV3 3	GO:0005575;GO:0006810;GO:0055085;GO:0022857;GO:0003674;GO:0032991;GO:0050877;GO:0048870;GO:0040011	cellular_component;transport;transmembrane transport;transmembrane transporter activity;molecular_function;protein-containing complex;nervous system process;cell motility;locomotion
ENSONIG00000019918	calcium-binding protein 2		24.6089	18.5738	1.32854	0.40984	4.47047	5.42439	0.0198573	0.46	2	protein_coding		100708479	I3KVE1;I3KVE0	GO:0005509;GO:0046872	calcium ion binding;metal ion binding	molecular_function	PTHR23050_SF21;PTHR23050_SF129	CALCIUM BINDING 2 CABP2;CALCIUM BINDING 4 CABP4	GO:0003674;GO:0043167	molecular_function;ion binding
ENSONIG00000013215			0.541445	1.38321	-2.51586	-1.33105	0.0209787	5.42118	0.0198939	0.460031	2	protein_coding							PTHR10489_SF545	UNKNOWN
ENSONIG00000010179	aldehyde dehydrogenase 18 family member A1	ALDH18A1	56.1625	47.3822	1.18394	0.2436	5.72769	5.40742	0.0200514	0.460272	1	protein_coding				GO:0016620;GO:0003824;GO:0005737;GO:0055114;GO:0016491;GO:0006561;GO:0004350;GO:0004349;GO:0016740;GO:0000166;GO:0005524;GO:0016301;GO:0016310;GO:0005739;GO:0008652;GO:0055129	oxidoreductase activity, acting on the aldehyde or oxo group of donors, NAD or NADP as acceptor;catalytic activity;cytoplasm;oxidation-reduction process;oxidoreductase activity;proline biosynthetic process;glutamate-5-semialdehyde dehydrogenase activity;glutamate 5-kinase activity;transferase activity;nucleotide binding;ATP binding;kinase activity;phosphorylation;mitochondrion;cellular amino acid…	molecular_function;cellular_component;biological_process	PTHR11063	DELTA 1 PYRROLINE 5 CARBOXYLATE SYNTHASE P5CS [INCLUDES GLUTAMATE 5 KINASE GK EC_2.7.2.11 GAMMA GLUTAMYL KINASE ; GAMMA GLUTAMYL PHOSPHATE REDUCTASE GPR EC_1.2.1.- 41 GLUTAMATE 5 SEMIALDEHYDE DEHYDROGENASE GLUTAMYL GAMMA SEMIALDEHYDE DEHYDROGENASE ]	GO:0016491;GO:0005575;GO:0005737;GO:0003674;GO:0009058;GO:0044281;GO:0006520;GO:0016301;GO:0043167;GO:0043226;GO:0005739	oxidoreductase activity;cellular_component;cytoplasm;molecular_function;biosynthetic process;small molecule metabolic process;cellular amino acid metabolic process;kinase activity;ion binding;organelle;mitochondrion	00330+2.7.2.11;00332+2.7.2.11;00332+1.2.1.41;00330+1.2.1.41;00330+2.7.2.11+1.2.1.41;00332+2.7.2.11+1.2.1.41
ENSONIG00000010389	regulator of microtubule dynamics protein 2	rmdn2	5.65983	3.22346	1.74813	0.805813	2.16561	5.41797	0.0199305	0.460272	1	protein_coding	ZDB-GENE-111223-1	100705572	I3JW10	GO:0005515	protein binding	molecular_function	PTHR16056	REGULATOR OF MICROTUBULE DYNAMICS RMD	GO:0003674	molecular_function
ENSONIG00000011270	spectrin alpha, non-erythrocytic 1	sptan1	465.82	537.359	-1.15369	-0.206259	8.95788	5.40665	0.0200601	0.460272	2	protein_coding	ZDB-GENE-051113-60	100702242	I3JZ90;I3JZ89	GO:0005509;GO:0005515;GO:0045162;GO:0033268;GO:0033270	calcium ion binding;protein binding;clustering of voltage-gated sodium channels;node of Ranvier;paranode region of axon	molecular_function;biological_process;cellular_component	PTHR11915_SF250	SPECTRIN ALPHA CHAIN NON ERYTHROCYTIC 1 ALPHA II SPECTRIN FODRIN ALPHA CHAIN	GO:0003674;GO:0043167;GO:0061024;GO:0021700	molecular_function;ion binding;membrane organization;developmental maturation
ENSONIG00000011504			91.4483	133.539	-1.46045	-0.546411	6.68125	5.41393	0.0199767	0.460272	1	protein_coding				GO:0000413;GO:0003755;GO:0006457;GO:0016853	protein peptidyl-prolyl isomerization;peptidyl-prolyl cis-trans isomerase activity;protein folding;isomerase activity	biological_process;molecular_function	PTHR11071_SF242	PEPTIDYL PROLYL CIS TRANS ISOMERASE E PPIASE E EC_5.2.1.8 CYCLOPHILIN E ROTAMASE E	GO:0006457;GO:0016853;GO:0006464	protein folding;isomerase activity;cellular protein modification process
ENSONIG00000018915	ATPase family, AAA domain containing 3A	ATAD3A	26.6008	21.5054	1.23402	0.30336	4.6014	5.4116	0.0200033	0.460272	2	protein_coding		100711548	I3KRS5;I3KRS4	GO:0007005;GO:0005739;GO:0005524	mitochondrion organization;mitochondrion;ATP binding	biological_process;cellular_component;molecular_function	PTHR23075_SF4	ATPASE FAMILY AAA DOMAIN CONTAINING 3	GO:0003674;GO:0043167;GO:0005575;GO:0043226;GO:0005739;GO:0007005	molecular_function;ion binding;cellular_component;organelle;mitochondrion;mitochondrion organization
ENSONIG00000020744	family with sequence similarity 84 member A	fam84a	12.4925	9.70828	1.28932	0.366611	3.49395	5.40662	0.0200605	0.460272	1	protein_coding	ZDB-GENE-040426-1247	100699003	I3KY53				PTHR13943_SF38	FAM84A
ENSONIG00000007011			4.85721	6.95285	-1.43391	-0.519956	2.67935	5.40381	0.0200928	0.460418	1	protein_coding				GO:0003676	nucleic acid binding	molecular_function	PTHR24387_SF0	ZINC FINGER ZFAT ZINC FINGER 406	GO:0003674	molecular_function
ENSONIG00000007784	polypyrimidine tract-binding protein 1		62.3673	52.9799	1.17803	0.236378	5.86646	5.39519	0.0201924	0.461237	2	protein_coding		100710677	I3JLR1;I3JLR0	GO:0006397;GO:0003723;GO:0003676;GO:0005634	mRNA processing;RNA binding;nucleic acid binding;nucleus	biological_process;molecular_function;cellular_component	PTHR11546	POLYPYRIMIDINE TRACT BINDING	GO:0005575;GO:0043226;GO:0005634;GO:0003674;GO:0003723;GO:0034641;GO:0006397	cellular_component;organelle;nucleus;molecular_function;RNA binding;cellular nitrogen compound metabolic process;mRNA processing
ENSONIG00000013334	myelin protein zero-like 1 like	mpzl1l	50.5316	61.6528	-1.21835	-0.284934	5.79714	5.39394	0.0202068	0.461237	1	protein_coding	ZDB-GENE-050417-455			GO:0005887;GO:0007165;GO:0016020;GO:0060028	integral component of plasma membrane;signal transduction;membrane;convergent extension involved in axis elongation	cellular_component;biological_process	PTHR13869	PRECURSOR	GO:0005575;GO:0007165	cellular_component;signal transduction
ENSONIG00000020381	si:dkey-6b12.5	si:dkey-6b12.5	33.8392	40.1655	-1.18682	-0.247097	5.20289	5.39434	0.0202022	0.461237	1	protein_coding	ZDB-GENE-091204-190			GO:0016192;GO:0017137;GO:0016887;GO:0005515	vesicle-mediated transport;Rab GTPase binding;ATPase activity;protein binding	biological_process;molecular_function	PTHR24072_SF139	RHO RELATED BTB DOMAIN CONTAINING 3	GO:0003674;GO:0016887;GO:0006810;GO:0016192	molecular_function;ATPase activity;transport;vesicle-mediated transport
ENSONIG00000000060			1.52669	0.685196	2.23204	1.15836	0.464192	5.38285	0.0203356	0.462726	1	protein_coding							PTHR15665	ASTEROID HOMOLOG 1
ENSONIG00000000264	cyclin and CBS domain divalent metal cation transport mediator 1	CNNM1 (1 of many)	18.3873	24.1739	-1.31546	-0.395566	4.33281	5.36442	0.0205517	0.462726	2	protein_coding			I3IUP7;I3IUP6	GO:0016020;GO:0016021	membrane;integral component of membrane	cellular_component	PTHR12064_SF28	METAL TRANSPORTER CNNM1 ANCIENT CONSERVED DOMAIN CONTAINING 1 CYCLIN M1	GO:0005575	cellular_component
ENSONIG00000005255	RB transcriptional corepressor like 1	rbl1	14.0985	10.89	1.29762	0.375865	3.65573	5.38546	0.0203053	0.462726	2	protein_coding	ZDB-GENE-030131-8179	100699851	I3JCL3;I3JCL2	GO:0005667;GO:0051726;GO:0006357;GO:0005634;GO:0051302	transcription factor complex;regulation of cell cycle;regulation of transcription by RNA polymerase II;nucleus;regulation of cell division	cellular_component;biological_process	PTHR13742	RETINOBLASTOMA	GO:0005575;GO:0043226;GO:0005634;GO:0032991	cellular_component;organelle;nucleus;protein-containing complex
ENSONIG00000005447	tumor necrosis factor receptor superfamily, member 19	tnfrsf19	22.2926	17.9879	1.237	0.306844	4.32254	5.3672	0.0205188	0.462726	1	protein_coding	ZDB-GENE-030131-6760			GO:0005515;GO:0016020;GO:0016021;GO:0002040;GO:0014045;GO:0048916;GO:0048922	protein binding;membrane;integral component of membrane;sprouting angiogenesis;establishment of endothelial blood-brain barrier;posterior lateral line development;posterior lateral line neuromast deposition	molecular_function;cellular_component;biological_process	PTHR12120	TUMOR NECROSIS FACTOR RECEPTOR SUPERFAMILY MEMBER EDAR PRECURSOR ECTODYSPLASIN A RECEPTOR	GO:0003674;GO:0005575;GO:0048646;GO:0048856	molecular_function;cellular_component;anatomical structure formation involved in morphogenesis;anatomical structure development
ENSONIG00000006202	chondroitin polymerizing factor 2	chpf2	30.7556	25.6215	1.19934	0.262241	4.84373	5.36373	0.0205598	0.462726	1	protein_coding	ZDB-GENE-030131-7797	100691508	I3JG24	GO:0008376;GO:0032580;GO:0016740;GO:0005794	acetylgalactosaminyltransferase activity;Golgi cisterna membrane;transferase activity;Golgi apparatus	molecular_function;cellular_component	PTHR12369	CHONDROITIN SULFATE SYNTHASE EC_2.4.1.- 226 GLUCURONOSYL N ACETYLGALACTOSAMINYL PROTEOGLYCAN 4 BETA N ACETYLGALACTOSAMINYLTRANSFERASE N ACETYLGALACTOSAMINYL PROTEOGLYCAN 3 BETA GLUCURONOSYLTRANSFERASE	GO:0016757;GO:0005575;GO:0043226;GO:0005794	transferase activity, transferring glycosyl groups;cellular_component;organelle;Golgi apparatus
ENSONIG00000008052			6.32693	9.10888	-1.44063	-0.526697	2.92	5.37576	0.0204185	0.462726	3	protein_coding				GO:0007165;GO:0005515;GO:0005096;GO:0043547	signal transduction;protein binding;GTPase activator activity;positive regulation of GTPase activity	biological_process;molecular_function	PTHR23175_SF5	RHO GTPASE ACTIVATING 23 RHO TYPE GTPASE ACTIVATING 23	GO:0003674;GO:0007165;GO:0030234	molecular_function;signal transduction;enzyme regulator activity
ENSONIG00000010762	RAR related orphan receptor B	rorb	6.02747	4.14114	1.46105	0.547008	2.47405	5.3647	0.0205483	0.462726	2	protein_coding	ZDB-GENE-061204-2	100711296	I3JXD4;I3JXD5	GO:0003707;GO:0008270;GO:0043565;GO:0003700;GO:0005634;GO:0006355;GO:0003677;GO:0004879;GO:0046872;GO:0043401;GO:0030522	steroid hormone receptor activity;zinc ion binding;sequence-specific DNA binding;DNA-binding transcription factor activity;nucleus;regulation of transcription, DNA-templated;DNA binding;nuclear receptor activity;metal ion binding;steroid hormone mediated signaling pathway;intracellular receptor signaling pathway	molecular_function;cellular_component;biological_process	PTHR24082_SF206	NUCLEAR RECEPTOR ROR BETA NUCLEAR RECEPTOR RZR BETA NUCLEAR RECEPTOR SUBFAMILY 1 GROUP F MEMBER 2 RETINOID RELATED ORPHAN RECEPTOR BETA	GO:0003674;GO:0003677;GO:0005575;GO:0043226;GO:0005634;GO:0003700;GO:0043167;GO:0007165	molecular_function;DNA binding;cellular_component;organelle;nucleus;DNA-binding transcription factor activity;ion binding;signal transduction
ENSONIG00000012637	sepiapterin reductase	spra	23.7295	19.1223	1.24192	0.312575	4.33785	5.37959	0.0203736	0.462726	1	protein_coding	ZDB-GENE-050522-412	100692206	I3K460	GO:0055114;GO:0006729;GO:0004757	oxidation-reduction process;tetrahydrobiopterin biosynthetic process;sepiapterin reductase activity	biological_process;molecular_function	PTHR24318	SEPIAPTERIN REDUCTASE SPR EC_1.1.1.153	GO:0009058;GO:0044281;GO:0034641;GO:0051186	biosynthetic process;small molecule metabolic process;cellular nitrogen compound metabolic process;cofactor metabolic process	00790+1.1.1.153
ENSONIG00000016902	calmodulin binding transcription activator 1a	camta1a	57.8082	70.3058	-1.21664	-0.282905	5.99829	5.37678	0.0204065	0.462726	2	protein_coding	ZDB-GENE-090312-183			GO:0000981;GO:0005515;GO:0006357	DNA-binding transcription factor activity, RNA polymerase II-specific;protein binding;regulation of transcription by RNA polymerase II	molecular_function;biological_process	PTHR23335_SF2	CALMODULIN BINDING TRANSCRIPTION ACTIVATOR 1	GO:0003674;GO:0003700	molecular_function;DNA-binding transcription factor activity
ENSONIG00000018770	BUB1 mitotic checkpoint serine/threonine kinase	bub1	1.32956	0.650732	2.0221	1.01585	0.0657501	5.37145	0.020469	0.462726	2	protein_coding	ZDB-GENE-081104-75	100710499	I3KR86;I3KR85	GO:0007094;GO:0006468;GO:0004672;GO:0005524	mitotic spindle assembly checkpoint;protein phosphorylation;protein kinase activity;ATP binding	biological_process;molecular_function	PTHR14030_SF3	MITOTIC CHECKPOINT SERINE/THREONINE KINASE BUB1 EC_2.7.11.1 BUB1A	GO:0003674;GO:0043167;GO:0016301;GO:0006464	molecular_function;ion binding;kinase activity;cellular protein modification process
ENSONIG00000020559			0.276307	0.833842	-3.12658	-1.64459	-0.592371	5.37366	0.0204431	0.462726	1	protein_coding				GO:0008270;GO:0005515;GO:0046872	zinc ion binding;protein binding;metal ion binding	molecular_function	PTHR25462_SF201	TRIM	GO:0003674;GO:0043167	molecular_function;ion binding
ENSONIG00000002184	aminolevulinate, delta-, synthase 2	alas2	28.2504	14.8991	1.89338	0.920966	4.37259	5.34718	0.0207558	0.463598	1	protein_coding	ZDB-GENE-001229-1			GO:0033014;GO:0006778;GO:0003870;GO:0005759;GO:0016740;GO:0009058;GO:0030170;GO:0003824;GO:0005739;GO:0016746;GO:0006782;GO:0006783;GO:0020027;GO:0035162;GO:0042541;GO:0048821	tetrapyrrole biosynthetic process;porphyrin-containing compound metabolic process;5-aminolevulinate synthase activity;mitochondrial matrix;transferase activity;biosynthetic process;pyridoxal phosphate binding;catalytic activity;mitochondrion;transferase activity, transferring acyl groups;protoporphyrinogen IX biosynthetic process;heme biosynthetic process;hemoglobin metabolic process;embryonic he…	biological_process;molecular_function;cellular_component	PTHR13693_SF58	5 AMINOLEVULINATE SYNTHASE ERYTHROID SPECIFIC MITOCHONDRIAL PRECURSOR ALAS E EC_2.3.1.37 5 AMINOLEVULINIC ACID SYNTHASE 2 DELTA ALA SYNTHASE 2 DELTA AMINOLEVULINATE SYNTHASE 2	GO:0003674;GO:0043167;GO:0009058;GO:0005575;GO:0016746;GO:0051186;GO:0034641;GO:0043226;GO:0005739;GO:0048856	molecular_function;ion binding;biosynthetic process;cellular_component;transferase activity, transferring acyl groups;cofactor metabolic process;cellular nitrogen compound metabolic process;organelle;mitochondrion;anatomical structure development	00860+2.3.1.37;00260+2.3.1.37
ENSONIG00000005691	huntingtin interacting protein 1	hip1	15.4011	19.4477	-1.26477	-0.33888	4.14525	5.34912	0.0207327	0.463598	1	protein_coding	ZDB-GENE-010328-15			GO:0072583;GO:0035091;GO:0006897;GO:0005543;GO:0030136;GO:0030276;GO:0048268;GO:0006915;GO:0001878;GO:0043009	clathrin-dependent endocytosis;phosphatidylinositol binding;endocytosis;phospholipid binding;clathrin-coated vesicle;clathrin binding;clathrin coat assembly;apoptotic process;response to yeast;chordate embryonic development	biological_process;molecular_function;cellular_component	PTHR10407	HUNTINGTIN INTERACTING 1 HUNTINGTIN INTERACTING HIP	GO:0008219;GO:0003674;GO:0022607;GO:0065003;GO:0005575;GO:0043226;GO:0031410;GO:0043167;GO:0008289;GO:0006810;GO:0016192;GO:0048856;GO:0009790	cell death;molecular_function;cellular component assembly;protein-containing complex assembly;cellular_component;organelle;cytoplasmic vesicle;ion binding;lipid binding;transport;vesicle-mediated transport;anatomical structure development;embryo development
ENSONIG00000006844	glutaminase 2b (liver, mitochondrial)	gls2b	0.890211	0.264589	3.26901	1.70885	-0.445418	5.34875	0.0207371	0.463598	1	protein_coding	ZDB-GENE-050208-408			GO:0005515;GO:0006541;GO:0004359	protein binding;glutamine metabolic process;glutaminase activity	molecular_function;biological_process	PTHR12544	GLUTAMINASE ISOFORM MITOCHONDRIAL PRECURSOR GLS EC_3.5.1.2 GLUTAMINASE L GLUTAMINE AMIDOHYDROLASE	GO:0003674;GO:0044281;GO:0006520;GO:0016810	molecular_function;small molecule metabolic process;cellular amino acid metabolic process;hydrolase activity, acting on carbon-nitrogen (but not peptide) bonds	00250+3.5.1.2;00220+3.5.1.2;00471+3.5.1.2
ENSONIG00000014474	bassoon (presynaptic cytomatrix protein) b	bsnb	228.871	283.769	-1.23995	-0.310288	7.96059	5.3472	0.0207556	0.463598	3	protein_coding	ZDB-GENE-120628-1			GO:0048786;GO:0045202;GO:0046872;GO:0007416	presynaptic active zone;synapse;metal ion binding;synapse assembly	cellular_component;molecular_function;biological_process	PTHR14113	PICCOLO ACZONIN	GO:0003674;GO:0043167;GO:0005575;GO:0022607	molecular_function;ion binding;cellular_component;cellular component assembly
ENSONIG00000015780	phosphatidylinositol glycan anchor biosynthesis class G	si:ch73-49o8.1	11.7483	16.0955	-1.37144	-0.455694	3.82399	5.35304	0.0206861	0.463598	1	protein_coding	ZDB-GENE-141215-6	100698607		GO:0006506;GO:0003824;GO:0051377;GO:0016020;GO:0016021	GPI anchor biosynthetic process;catalytic activity;mannose-ethanolamine phosphotransferase activity;membrane;integral component of membrane	biological_process;molecular_function;cellular_component	PTHR23072	GPI ETHANOLAMINE PHOSPHATE TRANSFERASE 2 EC 2 GLYCOSYLPHOSPHATIDYLINOSITOL ANCHOR BIOSYNTHESIS 7	GO:0003674;GO:0009058;GO:0006464;GO:0006629;GO:0005575	molecular_function;biosynthetic process;cellular protein modification process;lipid metabolic process;cellular_component
ENSONIG00000020631	SRY-box 11	sox11a	26.7478	20.5511	1.30281	0.381629	4.57084	5.35646	0.0206457	0.463598	1	protein_coding	ZDB-GENE-980526-395	100712304	I3KXU0	GO:0003700;GO:0003677;GO:0005634;GO:0006355	DNA-binding transcription factor activity;DNA binding;nucleus;regulation of transcription, DNA-templated	molecular_function;cellular_component;biological_process	PTHR10270_SF113	TRANSCRIPTION FACTOR SOX 11	GO:0003674;GO:0003700;GO:0003677;GO:0005575;GO:0043226;GO:0005634	molecular_function;DNA-binding transcription factor activity;DNA binding;cellular_component;organelle;nucleus
ENSONIG00000001137	pantothenate kinase 1	pank1a	16.72	23.8878	-1.43051	-0.516526	4.32463	5.34335	0.0208015	0.464033	2	protein_coding	ZDB-GENE-040426-2846	100705818	I3IXU9;I3IXV0	GO:0015937;GO:0004594;GO:0005524;GO:0016310;GO:0001878	coenzyme A biosynthetic process;pantothenate kinase activity;ATP binding;phosphorylation;response to yeast	biological_process;molecular_function	PTHR12280_SF23	PANTOTHENATE KINASE 1 EC_2.7.1.33 PANTOTHENIC ACID KINASE 1	GO:0003674;GO:0043167;GO:0016301;GO:0009058;GO:0044281;GO:0034641;GO:0051186	molecular_function;ion binding;kinase activity;biosynthetic process;small molecule metabolic process;cellular nitrogen compound metabolic process;cofactor metabolic process	00770+2.7.1.33
[truncated: 16,897 more rows]

## Sheet: DEG
gene_id	gene_description	gene_name	baseMeanCPM_T_30	baseMeanCPM_V_30	FC	logFC	logCPM	LR	PValue	FDR	transcript_count	gene_biotype	zfin_id_id	Entrez_id	Uniprot_id	go_id	go_term	go_ontology	interpro_family	interpro_family_description	goslim_goa_accession	goslim_goa_description	kegg_path_enzyme
[truncated: 101 more rows]
